# Supplementary material for: Five-coordinate transition metal complexes and the value of τ5: observations and caveats
Source: Royal Society of Chemistry journal article supplement (doi:10.1039/d0dt02985h), 2020-01-01
Supplement: d0dt02985h1.xlsx [file d0dt02985h1.xlsx]

## Sheet: Query 1
Parameter Values for Query: 1																				NB - Dist 1 = MX1, Dist 2 = M-X2, Dist 3 = M-X3, Dist 4 = M-X4, Dist 5 = M-X5. Ang1 = X1MX2, Ang2 = X2MX3, Ang3 = X3MX4, Ang4 = X4MX5, Ang6 = X5MX1, Ang7 = X1MX3, Ang8 = X2MX4, Ang9 = X3MX5, Ang10 = X4MX1, Ang11 = X5MX2
Refcode	ANG1 (A)	ANG10 (A)	ANG11 (A)	ANG2 (A)	ANG3 (A)	ANG4 (A)	ANG6 (A)	ANG7 (A)	ANG8 (A)	ANG9 (A)	DIST1 (D)	DIST2 (D)	DIST3 (D)	DIST4 (D)	DIST5 (D)		beta	alpha	tau
NEHQID	90.664	52.387	79.334	179.047	83.58	104.609	52.393	89.31	97.156	99.904	3.115	2.321	2.31	3.113	3.039		179.047	104.609	1.24063
RENGUP	96.816	52.599	179.02	100.192	104.6	97.41	83.652	52.197	83.554	79.406	3.139	2.322	2.994	2.903	2.302		179.02	104.6	1.24033
EPUSUF	92.795	53.181	178.082	81.426	51.854	93.679	88.791	104.917	88.137	99.212	2.911	2.32	3.145	3.247	2.312		178.082	104.917	1.21942
NEHQUP	89.022	51.621	100.11	177.343	98.399	104.529	53.141	93.451	83.898	80.648	3.104	2.295	2.308	3.07	2.992		177.343	104.529	1.21357
NAXDAU	93.141	52.523	91.051	176.227	86.937	103.418	50.995	90.415	96.229	90.205	3.241	2.045	2.081	2.859	3.148		176.227	103.418	1.21348
NEHQOJ	53.221	89.386	78.682	105.639	83.671	178.363	90.227	52.578	99.822	97.351	3.134	3.018	3.1	2.295	2.311		178.363	105.639	1.21207
EHOCAH	91.186	49.564	171.632	84.889	98.634	88.945	97.103	49.074	97.35	99.667	3.218	2.29	3.208	3.168	2.317		171.632	99.667	1.19942
LAXVIP	50.38	91.966	100.76	77.31	176.068	77.31	50.38	91.966	105.274	105.274	2.632	2.481	1.927	1.927	2.481		176.068	105.274	1.1799
VEYFEM	70.469	180	109.413	109.437	109.527	109.521	70.479	70.473	109.531	109.398	2.762	2.276	2.276	1.792	2.277		180	109.531	1.17448
COZRIT	70.634	179.96	109.576	109.576	109.399	109.369	70.634	70.634	109.33	109.576	2.603	2.244	2.244	2.393	2.244		179.96	109.576	1.17307
POGTIO	50.455	52.374	105.533	76.922	105.528	77.313	91.637	92.473	102.818	175.876	2.569	2.544	1.926	2.467	1.935		175.876	105.533	1.17238
UJIDIC	73.108	55.589	96.668	174.542	80.593	51.829	102.138	104.377	101.462	88.579	2.969	2.336	2.332	3.019	3.223		174.542	104.377	1.16942
TITRAR	70.083	180	109.001	109.054	109.921	109.907	70.093	70.079	109.917	109.016	2.384	2.25	2.249	2.263	2.251		180	109.921	1.16798
COZROZ	70.057	180	108.974	108.97	109.954	109.955	70.045	70.046	109.943	109.019	2.638	2.326	2.325	2.4	2.325		180	109.955	1.16742
UJIDIC	101.603	55.582	89.05	172.984	102.577	51.972	103.246	75.61	80.616	97.841	2.934	2.296	2.319	3.037	3.211		172.984	103.246	1.1623
MASVEJ	71.431	180	110.358	110.358	108.569	108.569	71.431	71.431	108.569	110.358	2.312	2.443	2.443	2.501	2.443		180	110.358	1.1607
LOVLUF	110.259	109.124	179.843	109.994	108.603	69.933	69.797	108.916	109.912	70.105	2.468	2.432	2.46	2.459	2.369		179.843	110.259	1.15973
UJIDIC	75.456	55.699	97.49	173.169	78.616	52.379	103.733	99.876	102.273	88.422	2.951	2.291	2.296	3	3.194		173.169	103.733	1.15727
UJIDIC	105.51	55.811	82.497	174.924	103.986	51.83	104.008	74.612	79.928	102.443	2.966	2.296	2.31	3.033	3.14		174.924	105.51	1.1569
RENGUP	86.525	52.814	174.536	104.755	105.2	101.392	98.428	53.098	79.728	80.188	3.065	2.313	2.956	3.004	2.319		174.536	105.2	1.1556
GEZKED	110.633	108.255	71.744	110.67	108.263	180	71.745	110.667	108.256	71.737	1.993	1.992	1.992	1.984	1.432		180	110.67	1.1555
TITQOE	69.28	69.28	110.72	108.194	108.194	110.72	180	69.28	108.194	110.72	2.37	2.272	2.272	2.272	2.566		180	110.72	1.15467
UJECAN	71.825	180	110.74	110.764	108.17	108.164	71.836	71.83	108.175	110.719	2.641	2.197	2.198	2.264	2.198		180	110.764	1.15393
NEHQID	52.188	89.579	86.005	103.94	84.993	173.143	97.274	51.895	98.474	99.023	3.17	3.077	3.023	2.306	2.302		173.143	103.94	1.15338
TITREV	71.881	180	110.785	110.827	108.116	108.107	71.893	71.884	108.119	110.77	2.332	2.175	2.175	2.188	2.176		180	110.827	1.15288
ABEVEK	69.13	69.14	110.87	108.062	108.025	110.86	180	69.134	108.038	110.866	2.684	2.352	2.352	2.353	2.599		180	110.87	1.15217
QAFWOL	107.573	107.562	72.427	111.328	111.279	72.438	180	107.565	111.314	72.435	2.473	2.144	2.145	2.145	2.174		180	111.328	1.14453
NEHQUP	96.444	52.195	171.767	86.113	103.101	88.652	91.785	51.212	96.178	99.316	3.172	2.307	3.042	2.963	2.302		171.767	103.101	1.14443
SADXUQ	107.466	107.466	72.534	111.4	111.4	72.534	180	107.466	111.4	72.534	2.653	2.231	2.231	2.231	2.588		180	111.4	1.14333
ABEWEL	68.512	68.512	111.488	107.381	107.381	111.488	180	68.512	107.381	111.488	2.755	2.289	2.289	2.289	2.554		180	111.488	1.14187
EPUSUF	87.687	51.249	172.668	92.377	53.181	94.592	97.27	104.329	92.725	91.625	3.162	2.298	2.866	3.245	2.321		172.668	104.329	1.13898
OFIMUM	106.871	180	111.942	111.942	73.129	73.129	106.871	106.871	73.129	111.942	2.411	2.183	2.183	2.507	2.183		180	111.942	1.1343
TACXAZ	67.916	106.736	67.916	180	112.084	106.736	106.736	112.084	67.916	112.084	2.599	2.323	2.339	2.599	2.599		180	112.084	1.13193
NIQYIX	67.886	180	106.685	106.733	112.118	112.104	67.896	67.882	112.114	106.7	2.464	2.345	2.345	2.354	2.346		180	112.118	1.13137
TELMUV	92.711	104.54	172.375	94.512	51.353	95.035	87.025	53.188	92.409	91.432	2.787	2.314	3.145	3.079	2.322		172.375	104.54	1.13058
PONYIC	179.014	109.877	69.644	70.062	109.193	109.247	111.209	109.09	70.109	108.183	2.412	2.604	2.229	2.252	2.259		179.014	111.209	1.13008
NEHQOJ	52.837	52.132	85.735	98.596	83.944	100.699	97.741	89.563	104.887	172.692	3.154	3.048	2.32	3.021	2.312		172.692	104.887	1.13008
JARDIP	88.763	90.68	108.637	75.373	101.492	73.769	53.051	52.13	176.383	104.906	2.854	1.904	2.623	1.901	2.549		176.383	108.637	1.1291
KEBTAP	71.395	70.676	107.732	111.554	107.484	109.832	179.123	70.656	110.501	109.741	2.427	2.297	2.293	2.291	2.396		179.123	111.554	1.12615
XIZPUS	112.548	112.548	106.185	73.815	73.815	106.185	106.185	73.815	112.548	180	2.543	2.543	2.428	2.543	1.765		180	112.548	1.1242
FIFXAW	98.514	52.183	104.378	172.107	89.793	104.695	52.754	88.285	91.223	82.913	3.233	2.314	2.273	2.989	2.891		172.107	104.695	1.12353
XIZPUS	112.603	106.122	73.878	112.603	106.122	180	73.878	112.603	106.122	73.878	2.529	2.529	2.529	2.228	2.418		180	112.603	1.12328
JOFQAW	55.075	89.101	110.829	109	109.255	178.187	89.166	53.931	68.529	69.243	2.94	2.696	2.735	2.187	2.195		178.187	110.829	1.12263
HUPJOT	105.981	112.686	105.991	180	74.019	112.739	112.74	74.019	105.981	74.009	2.355	2.178	2.521	2.355	2.353		180	112.74	1.121
LELNOI	105.962	105.962	74.038	112.741	112.741	74.038	180	105.962	112.741	74.038	2.34	2.323	2.323	2.323	2.252		180	112.741	1.12098
FUNHIG	105.852	105.843	112.85	74.148	74.157	112.8	105.838	180	112.876	74.162	2.062	2.03	2.389	2.031	2.032		180	112.876	1.11873
TOYDAM	74.248	74.244	105.752	112.921	112.941	105.756	180	74.238	112.887	105.762	2.417	1.769	1.768	1.768	1.741		180	112.941	1.11765
FUNHIG	105.603	105.588	74.397	113.095	113.018	74.412	180	105.598	113.045	74.402	2.029	2.033	2.034	2.035	2.354		180	113.095	1.11508
GEYRUZ	178.866	68.546	112.063	111.429	108.042	107.637	68.688	68.938	110.343	107.141	2.767	1.856	2.318	2.324	2.328		178.866	112.063	1.11338
VEYDOU	179.099	73.534	107.128	106.139	111.026	112.515	72.613	73.248	107.339	112.281	2.538	1.745	2.188	2.187	2.201		179.099	112.515	1.10973
SOWCOX	106.147	112.997	107.109	179.47	72.921	112.522	110.806	73.621	106.79	73.421	2.055	2.719	2.54	2.06	2.06		179.47	112.997	1.10788
RITVAT	178.15	70.467	109.831	111.746	107.636	108.222	70.024	69.872	107.978	111.283	2.874	2.543	2.304	2.316	2.292		178.15	111.746	1.10673
RAXVET	71.307	72.105	111.091	109.496	110.698	107.321	177.492	70.411	110.427	107.759	2.151	2.158	2.172	2.13	2.313		177.492	111.091	1.10668
EQUFUT	66.38	177.998	55.976	55.976	98.874	98.874	80.034	80.034	111.618	111.568	1.933	3.134	2.795	2.068	2.795		177.998	111.618	1.10633
HUPJOT	75.145	75.151	104.855	113.67	113.64	104.849	180	75.156	113.703	104.844	2.462	2.346	2.348	2.347	2.205		180	113.703	1.10495
ABEVUA	179.56	73.582	105.647	106.585	111.824	113.279	73.914	73.623	106.654	112.255	2.455	1.8	2.198	2.201	2.195		179.56	113.279	1.10468
XIZPOM	112.919	112.578	106	74.248	74.204	105.153	106.326	74.067	113.074	179.351	2.532	2.523	2.413	2.531	1.818		179.351	113.074	1.10462
XIZPIG	113.33	113.347	105.879	74.369	74.276	105.34	105.216	74.918	112.778	179.61	2.525	2.531	2.405	2.527	1.759		179.61	113.347	1.10438
GEYSEK	178.182	71.424	107.855	107.862	111.927	111.191	71.107	71.259	110.391	107.446	2.716	1.822	2.274	2.277	2.266		178.182	111.927	1.10425
GEYSEK	177.965	71.123	108.951	110.185	110.266	108.529	71.353	71.35	106.953	111.816	2.712	1.817	2.279	2.272	2.272		177.965	111.816	1.10248
JOFQAW	56.095	90.797	111.133	112.495	112.122	178.613	90.476	56.401	69.189	69.076	2.917	2.663	2.653	2.197	2.169		178.613	112.495	1.10197
VEKFOG	75.44	75.44	104.56	113.904	113.904	104.56	180	75.44	113.904	104.56	1.314	2.375	2.375	2.375	2.564		180	113.904	1.1016
KENWUY	104.549	180	113.912	113.912	75.451	75.451	104.549	104.549	75.451	113.912	2.402	2.048	2.048	2.331	2.048		180	113.912	1.10147
RUZKUU	84.405	54.598	172.163	86.39	106.092	92.796	103.137	51.572	89.872	99.924	3.188	2.351	2.956	2.848	2.297		172.163	106.092	1.10118
CAJDUO	178.347	73.48	105.842	107.578	111.559	112.339	72.527	72.997	107.578	111.578	2.533	1.742	2.194	2.186	2.196		178.347	112.339	1.10013
BAZFIU	178.715	105.435	74.478	73.948	112.501	112.742	105.701	107.063	73.372	112.708	2.69	2.516	2.069	2.056	2.06		178.715	112.742	1.09955
TELMUV	53.32	52.59	91.722	88.753	99.955	87.815	92.195	94.665	105.821	171.779	3.083	2.819	2.319	3.035	2.324		171.779	105.821	1.0993
CIWSEH	106.391	111.574	107.243	179.405	73.864	111.873	113.475	73.437	105.72	73.332	2.071	2.296	2.538	2.072	2.071		179.405	113.475	1.09883
WAKWOX	51.715	93.729	103.032	97.177	168.943	100.875	51.827	97.095	91.291	84.177	3.205	3.019	2.319	2.318	2.973		168.943	103.032	1.09852
IPOZAP	104.336	180	114.066	114.117	75.663	75.672	104.328	104.337	75.664	114.068	2.282	2.06	2.06	2.337	2.061		180	114.117	1.09805
RURPIF	177.994	69.099	108.67	111.135	108.178	109.077	69.344	69.559	112.168	107.487	2.791	1.872	2.302	2.304	2.301		177.994	112.168	1.0971
CAJDUO	178.373	73.44	105.656	107.577	111.381	112.571	72.762	72.874	107.694	111.59	2.533	1.739	2.196	2.183	2.195		178.373	112.571	1.0967
JOFQAW	91.023	89.457	111.952	68.009	113.091	67.515	56.116	55.792	178.872	111.889	2.914	2.167	2.648	2.199	2.683		178.872	113.091	1.09635
IPOZAP	104.132	180	114.241	114.241	75.868	75.868	104.132	104.132	75.868	114.241	2.277	2.076	2.076	2.291	2.076		180	114.241	1.09598
DOCLEO	104.219	104.23	75.743	114.139	114.206	75.782	179.961	104.227	114.161	75.799	1.819	2.011	2.01	2.009	2.37		179.961	114.206	1.09592
RIKXOB	108.657	106.541	72.634	107.796	112.976	72.866	178.705	107.738	112.94	71.597	2.298	1.939	1.928	1.926	2.539		178.705	112.976	1.09548
JOFQAW	88.238	88.102	110.376	69.352	107.294	68.328	53.476	53.334	176.101	106.773	2.941	2.153	2.747	2.146	2.741		176.101	110.376	1.09542
TELMUV	87.892	103.938	94.379	169.635	89.033	51.126	52.928	92.448	100.946	94.083	2.833	2.281	2.343	3.159	3.121		169.635	103.938	1.09495
RENGUP	104.689	54.148	173.696	82.444	54.037	86.697	75.876	108.08	98.741	103.429	2.954	2.304	2.91	3.015	2.314		173.696	108.08	1.0936
SIYTUQ	104.981	110.979	107.674	178.221	73.006	111.866	112.638	73.343	108.322	72.666	2.104	1.87	2.446	2.108	2.131		178.221	112.638	1.09305
WAKWOX	94.311	51.394	101.433	168.011	96.929	102.431	51.618	97.507	92.008	84.471	3.223	2.285	2.315	3.004	2.979		168.011	102.431	1.093
HUBVUW	179.33	74.258	105.701	104.524	113.802	112.404	74.458	74.832	106.231	113.235	2.411	1.819	2.21	2.215	2.211		179.33	113.802	1.09213
AVIYUB	177.917	110.202	71.095	71.152	112.241	112.462	108.665	107.065	71.662	105.951	2.619	2.435	2.39	2.374	2.422		177.917	112.462	1.09092
SAZVEX	103.818	103.799	76.182	114.518	114.399	76.201	180	103.79	114.57	76.21	2.034	2.044	2.048	2.047	2.502		180	114.57	1.0905
TITQUK	65.412	65.412	114.588	103.905	103.905	114.588	180	65.412	103.905	114.588	2.681	2.27	2.27	2.27	2.545		180	114.588	1.0902
XIBRIL	177.284	72.46	105.839	109.974	111.88	109.148	71.5	71.854	108.286	111.487	2.735	1.83	2.272	2.258	2.266		177.284	111.88	1.09007
HEWGOF	103.654	103.654	76.346	114.608	114.608	76.346	180	103.654	114.608	76.346	2.332	1.919	1.919	1.919	2.229		180	114.608	1.08987
RUCKEH	105.083	104.483	75.417	113.978	113.659	75.391	179.478	103.854	114.276	75.767	2.347	2.44	2.442	2.444	2.42		179.478	114.276	1.0867
NAXDEY	94.071	53.389	96.021	171.591	97.705	106.578	53.199	94.315	87.806	88.517	3.177	2.004	2.025	2.896	3.108		171.591	106.578	1.08355
BOHPEV	178.307	72.765	110.208	105.962	108.493	111.327	71.247	72.521	107.229	113.309	2.696	1.851	2.26	2.266	2.271		178.307	113.309	1.0833
RAYSUF	109.586	108.204	69.335	110.452	113.908	72.013	178.895	109.87	104.644	70.899	3.114	2.312	2.253	2.281	2.709		178.895	113.908	1.08312
MOQVET	76.891	180	115.014	115.014	103.109	103.109	76.891	76.891	103.109	115.014	2.393	2.014	2.014	2.064	2.014		180	115.014	1.0831
YIDSUC	115.041	103.072	76.928	115.042	103.072	180	76.928	115.041	103.072	76.928	1.964	1.964	1.964	2.022	2.418		180	115.042	1.08263
RAWPAJ	103.398	115.042	64.957	103.366	115.03	180	64.958	103.361	115.043	64.97	2.716	2.716	2.717	1.926	2.482		180	115.043	1.08262
RITTUL	70.504	67.304	112.232	108.689	108.615	112.004	177.133	71.048	108.315	106.879	3.081	2.284	2.271	2.32	2.541		177.133	112.232	1.08168
XIZPUS	113.029	107.914	112.681	73.776	177.83	104.388	112.155	74.064	105.976	73.861	2.534	2.53	2.423	1.81	2.525		177.83	113.029	1.08002
QAMBAI01	102.834	102.834	77.166	115.213	115.213	77.166	180	102.834	115.213	77.166	2.277	2.068	2.068	2.068	2.214		180	115.213	1.07978
SAZVEX	103.824	103.717	76.167	114.523	114.175	75.914	179.566	103.871	114.785	76.508	2.046	2.038	2.043	2.047	2.523		179.566	114.785	1.07968
QAMBAI	102.808	102.808	77.192	115.232	115.232	77.192	180	102.808	115.232	77.192	2.276	2.065	2.065	2.065	2.212		180	115.232	1.07947
PAJTAY	102.715	102.715	77.285	115.299	115.299	77.285	180	102.715	115.299	77.285	2.428	2.068	2.068	2.068	2.213		180	115.299	1.07835
RAXVET	72.121	110.423	177.013	72.171	112.349	105.635	110.86	110.888	72.732	106.499	2.144	2.171	2.132	2.125	2.339		177.013	112.349	1.07773
MOQVAP	77.507	180	115.456	115.456	102.493	102.493	77.507	77.507	102.493	115.456	2.311	1.999	1.999	2.079	1.999		180	115.456	1.07573
VEYDIO	176.379	70.424	110.28	111.133	109.164	108.21	70.975	71.008	105.984	111.85	2.8	1.761	2.258	2.266	2.267		176.379	111.85	1.07548
VECWIM	178.502	74.578	104.853	104.888	112.918	112.347	74.418	74.359	106.92	114.009	2.404	1.84	2.218	2.22	2.217		178.502	114.009	1.07488
XIZPOM	113.098	113.107	107.851	74.297	74.411	103.551	105.436	74.432	112.893	177.579	2.524	2.537	2.401	2.526	1.776		177.579	113.107	1.07453
VIWVUT	77.633	180	115.543	115.543	102.367	102.367	77.633	77.633	102.367	115.543	2.273	1.963	1.963	2.053	1.963		180	115.543	1.07428
KOMMOO01	102.354	180	115.553	115.553	77.646	77.646	102.354	102.354	77.646	115.553	1.813	1.827	1.827	2.295	1.827		180	115.553	1.07412
EQUFUT	65.362	178.136	56.912	56.912	100.577	100.577	78.45	78.45	112.774	113.71	1.974	3.09	2.804	2.106	2.804		178.136	113.71	1.07377
CEMZEC	95.982	53.669	171.569	87.969	107.167	87.384	92.168	53.498	99.18	95.178	3.128	1.979	2.981	2.909	1.934		171.569	107.167	1.07337
RUZKUU	54.708	95.53	106.743	93.247	171.138	97.298	52.052	93.193	90.525	89.295	3.181	2.86	2.35	2.225	2.927		171.138	106.743	1.07325
WAKWOX01	52.585	96.264	104.291	89.205	168.674	82.148	52.145	94.979	98.72	103.827	3.15	2.983	2.318	2.287	2.995		168.674	104.291	1.07305
TITRIZ	67.231	67.976	112.91	105.618	107.407	113.657	178.032	67.226	105.738	110.988	2.618	2.32	2.32	2.315	2.532		178.032	113.657	1.07292
TUCTIW	178.736	107.3	74.408	73.133	112.62	110.627	104.764	106.493	73.929	114.386	2.284	2.485	2.028	2.033	2.048		178.736	114.386	1.0725
TIRHIM	103.196	102.863	76.884	115.261	114.593	77.266	179.787	102.866	115.477	76.923	2.31	2.009	2.009	2.004	2.213		179.787	115.477	1.07183
GIGYEB	105.543	105.193	74.181	112.905	110.631	74.592	179.49	106.566	115.186	73.944	2.615	2.069	2.065	2.081	2.442		179.49	115.186	1.07173
VEYFOW	177.452	72.091	110.762	106.258	108.95	113.196	71.539	71.662	107.549	109.861	2.847	1.75	2.257	2.261	2.249		177.452	113.196	1.07093
AVIZAI	175.75	111.497	70.707	70.796	109.789	110.034	105.475	109.492	72.01	110.485	2.48	2.435	2.368	2.314	2.412		175.75	111.497	1.07088
KEMPUQ	105.977	177.857	112.082	113.609	73.911	73.52	105.244	108.219	73.106	111.145	2.247	2.037	2.05	2.471	2.038		177.857	113.609	1.0708
RAYSUF	107.489	108.324	72.241	111.972	114.696	70.845	178.932	108.252	105.832	72.773	3.114	2.324	2.263	2.301	2.655		178.932	114.696	1.0706
NIYCEE	101.997	101.997	78.003	115.797	115.797	78.003	180	101.997	115.797	78.003	1.857	1.951	1.951	1.951	2.322		180	115.797	1.07005
BAZFOA	179.77	107.3	72.303	72.024	110.193	107.644	107.926	107.858	72.584	115.607	2.472	2.586	2.126	2.109	2.135		179.77	115.607	1.06938
GEYSIO	177.127	72.03	108.846	105.59	111.922	112.982	71.218	71.781	110.324	106.838	2.672	1.867	2.28	2.273	2.271		177.127	112.982	1.06908
AVIZAI	71.705	111.326	178.032	71.377	106.704	109.305	108.565	113.927	72.226	106.852	2.357	2.451	2.377	2.393	2.468		178.032	113.927	1.06842
RUCKEH	104.221	103.874	75.16	113.257	113.644	75.934	179.141	105.285	115.056	75.538	2.323	2.435	2.421	2.436	2.42		179.141	115.056	1.06808
KOMMOO	101.733	180	115.974	115.974	78.267	78.267	101.733	101.733	78.267	115.974	1.834	1.833	1.833	2.264	1.833		180	115.974	1.0671
HAVTAC	101.712	101.712	78.288	115.989	115.989	78.288	180	101.712	115.989	78.288	2.107	2.062	2.062	2.062	2.225		180	115.989	1.06685
POCGAQ	94.96	77.533	85.58	60.905	46.103	109.033	173.038	92.251	105.674	94.067	2.34	3.273	2.796	2.714	2.346		173.038	109.033	1.06675
RUZKUU	95.81	55.004	170.977	97.964	106.975	91.898	92.271	51.975	89.462	90.172	3.178	2.316	2.945	2.83	2.275		170.977	106.975	1.0667
XIZPIG	106.777	113.505	106.839	177.487	74.373	113.001	112.686	74.684	103.124	74.196	2.538	1.766	2.404	2.531	2.532		177.487	113.505	1.06637
XIZPOM	107.673	112.646	102.854	177.122	74.319	113.167	113.025	74.198	106.62	74.318	2.531	1.764	2.407	2.53	2.525		177.122	113.167	1.06592
GEYRUZ	177.583	68.715	113.631	109.566	107.616	108.093	68.748	68.883	110.42	107.297	2.773	1.912	2.326	2.32	2.318		177.583	113.631	1.06587
RIKXOB	107.526	103.923	73.015	111.089	114.15	74.176	178.056	108.45	111.214	72.904	2.301	1.941	1.938	1.947	2.407		178.056	114.15	1.0651
NIYCII	102.334	102.367	77.447	115.699	115.326	77.856	179.745	102.05	115.847	77.947	1.864	1.966	1.965	1.965	2.346		179.745	115.847	1.06497
HAQKIW	180	78.428	101.568	101.564	116.085	116.112	78.432	78.436	101.572	116.054	2.288	2.048	2.13	2.128	2.129		180	116.112	1.0648
SIWJUD	102.064	63.867	116.133	102.064	63.867	180	116.133	102.064	63.867	116.133	2.613	2.613	2.613	2.81	2.326		180	116.133	1.06445
IFOGIV	177.07	71.61	105.389	108.11	113.212	111.749	72.029	71.722	110.911	107.069	2.661	1.83	2.266	2.266	2.257		177.07	113.212	1.0643
CAJFAW	178.342	74.897	107.494	105.677	114.531	111.162	74.109	73.15	104.722	112.536	2.611	1.736	2.17	2.167	2.168		178.342	114.531	1.06352
YIDSEM	179.626	102.409	76.256	77.001	113.367	115.828	103.807	103.283	77.243	115.702	2.717	2.386	1.917	1.922	1.926		179.626	115.828	1.0633
OJEKAR	53.051	98.026	89.765	106.102	102.067	169.899	91.94	53.546	94.897	85.167	3.158	2.936	2.902	2.012	1.986		169.899	106.102	1.06328
VEYFAI	176.372	70.699	107.942	112.642	111.65	107	70.71	70.933	106.854	110.488	2.75	1.814	2.268	2.258	2.277		176.372	112.642	1.06217
RAWPAJ	116.292	116.307	63.708	101.845	101.881	63.693	180	116.304	101.852	63.696	1.919	2.716	2.715	2.715	2.512		180	116.307	1.06155
ADOYAU	69.843	68.078	113.202	107.176	109.129	110.965	176.876	69.515	107.82	108.422	2.607	2.341	2.336	2.363	2.242		176.876	113.202	1.06123
RETCEY	116.292	101.204	78.793	116.34	101.21	180	78.796	116.319	101.207	78.79	3.125	3.125	3.124	1.947	1.977		180	116.34	1.061
KACNOS01	108.607	108.996	108.942	176.35	70.946	108.925	108.588	69.508	112.703	69.25	2.808	2.547	2.296	2.677	2.775		176.35	112.703	1.06078
KENWOS	178.157	106.655	74.436	75.188	112.58	114.562	104.538	103.986	75.186	113.336	2.26	2.343	2.037	2.049	2.038		178.157	114.562	1.05992
AGODAB	103.865	105.108	74.672	113.229	114.945	75.87	178.507	104.933	113.339	75.523	1.789	2.064	1.995	2.01	2.383		178.507	114.945	1.05937
DANPIU	77.597	115.579	77.398	179.204	101.472	115.472	115.646	103.183	78	102.346	2.215	2.445	1.651	2.213	2.227		179.204	115.646	1.0593
GIWYAM	100.993	100.993	79.007	116.453	116.453	79.007	180	100.993	116.453	79.007	2.574	2	2	2	2.243		180	116.453	1.05912
TITRIZ	66.749	67.183	112.615	105.573	105.574	114.644	178.139	67.141	106.103	111.643	2.642	2.334	2.313	2.314	2.564		178.139	114.644	1.05825
KOMWOY	178.337	103.308	75.715	76.216	112.958	114.412	104.983	104.72	75.037	114.854	2.711	2.635	2.554	2.567	2.548		178.337	114.854	1.05805
UQOSIE	73.254	105.111	172.87	92.565	51.84	76.811	108.946	53.272	109.423	94.107	3.149	2.319	3.181	3.091	2.313		172.87	109.423	1.05745
HAQKOC	180	79.23	100.77	100.77	116.591	116.591	79.23	79.23	100.77	116.591	2.29	2.024	2.165	2.165	2.165		180	116.591	1.05682
EXEFOE	100.812	100.809	79.188	116.561	116.535	79.191	180	100.804	116.607	79.196	2.325	1.983	1.985	1.984	2.294		180	116.607	1.05655
XIZPOM	113.104	107.44	74.43	112.947	107.694	176.494	74.146	112.723	102.068	74.182	2.534	2.519	2.538	1.762	2.407		176.494	113.104	1.0565
SAMNID	101.034	72.405	84.71	72.405	101.034	84.71	53.029	106.058	169.42	53.029	3.36	2	3.36	2	2.811		169.42	106.058	1.05603
RURNOJ	79.307	79.314	100.693	116.659	116.595	100.686	180	79.316	116.671	100.684	2.698	2.138	2.139	2.139	1.986		180	116.671	1.05548
SIWJUD	63.304	180	101.376	101.376	116.696	116.696	63.304	63.304	116.696	101.376	2.839	2.626	2.626	2.321	2.626		180	116.696	1.05507
ADECET	106.527	113.313	176.844	102.235	112.99	74.563	74.866	113.553	107.158	74.615	2.043	1.982	2.049	2.05	2.42		176.844	113.553	1.05485
EWECIT	179.522	77.951	101.749	101.08	115.686	115.914	78.168	78.555	102.499	116.24	2.302	2.129	2.099	2.116	2.114		179.522	116.24	1.0547
QOSWAX	100.625	180	116.66	116.719	79.375	79.382	100.618	100.625	79.375	116.665	2.58	2.499	2.498	2.54	2.5		180	116.719	1.05468
WEQLIN	106.504	112.58	104.424	178.227	74.236	114.947	112.854	75.159	104.415	75.297	2.064	2.423	2.445	2.066	2.066		178.227	114.947	1.05467
ZIDTAH	178.641	75.95	104.283	103.354	114.328	112.836	76.081	75.337	105.025	115.363	2.451	1.833	1.946	1.928	1.943		178.641	115.363	1.05463
CERQUL	100.581	180	116.677	116.74	79.416	79.423	100.577	100.584	79.419	116.704	2.584	2.091	2.09	2.12	2.092		180	116.74	1.05433
AVIYUB	176.18	112.933	71.168	70.56	110.595	108.638	108.969	106.03	70.313	109.619	2.634	2.466	2.399	2.368	2.342		176.18	112.933	1.05412
LOCWUV	101.637	116.161	102	179.383	77.736	115.004	115.904	77.863	102.829	77.938	2.032	1.737	2.183	2.027	2.02		179.383	116.161	1.0537
JAVWAS	116.831	180	101.21	101.21	63.169	63.169	116.831	116.831	63.169	101.21	2.213	2.7	2.7	2.503	2.7		180	116.831	1.05282
VEDZOT	63.111	180	101.139	101.139	116.889	116.889	63.111	63.111	116.889	101.139	2.68	2.475	2.475	2.304	2.475		180	116.889	1.05185
LUXGAM	178.892	103.709	77.873	77.063	115.808	115.137	101.181	103.899	76.261	114.467	2.28	2.229	2.055	2.075	2.073		178.892	115.808	1.0514
YOXFUO	79.837	180	116.955	116.955	100.163	100.163	79.837	79.837	100.163	116.955	2.505	2.194	2.194	1.785	2.194		180	116.955	1.05075
YEHWIR	179.255	103.014	77.53	77.846	114.658	116.231	101.831	102.143	77.643	115.82	2.292	2.267	1.815	1.8	1.817		179.255	116.231	1.0504
OFIMUM	100.056	180	117.018	117.018	79.944	79.944	100.056	100.056	79.944	117.018	2.398	2.079	2.079	2.114	2.079		180	117.018	1.0497
ZAGHIB	179.288	102.882	76.574	77.098	113.703	116.327	102.813	103.524	77.127	115.092	1.894	2.308	1.965	1.958	1.968		179.288	116.327	1.04935
OFIKUK	180	100.003	79.997	79.997	117.048	117.048	100.003	100.003	79.997	117.048	2.234	2.119	2.078	2.078	2.078		180	117.048	1.0492
IGUZUF	101.662	102.109	77.52	114.605	115.707	77.373	178.655	104.323	115.616	77.01	2.273	2.051	2.049	2.065	2.201		178.655	115.707	1.04913
YIDSAI	179.436	101.38	76.556	76.085	115.254	114.049	103.303	103.527	79.168	116.517	2.332	2.365	1.891	1.95	1.925		179.436	116.517	1.04865
JOFMOH	113.519	109.906	107.707	176.428	70.446	110.286	107.095	69.988	108.294	70.043	2.208	2.178	2.626	2.197	2.213		176.428	113.519	1.04848
XIPNES	99.957	180	117.125	117.068	80.052	80.046	99.954	99.948	80.043	117.039	1.768	1.91	1.911	2.171	1.91		180	117.125	1.04792
XIZPUS	74.609	113.467	176.361	74.402	113.504	109.05	103.366	112.509	74.583	103.904	2.529	2.396	2.52	2.53	2.199		176.361	113.504	1.04762
YOXFUO	80.11	180	117.144	117.067	99.888	99.896	80.104	80.112	99.89	117.126	2.51	2.171	2.171	1.806	2.17		180	117.144	1.0476
OBOCUE	101.003	103.63	77.222	115.256	114.957	76.659	178.1	104.431	115.013	77.044	2.268	2.069	2.059	2.024	2.342		178.1	115.256	1.0474
XIZPIG	113.405	113.686	107.129	74.218	74.419	107.68	101.63	74.915	112.355	176.519	2.531	2.536	2.399	2.534	1.762		176.519	113.686	1.04722
RIXGUA	176.693	71.987	105.044	107.673	110.419	108.612	72.514	71.761	111.112	113.879	2.418	2.346	2.389	2.38	2.399		176.693	113.879	1.0469
NIQYUJ	178.466	65.656	112.736	115.662	101.963	105.685	65.823	65.529	114.647	104.938	2.544	1.646	2.237	2.23	2.217		178.466	115.662	1.04673
GAHDIE	56.128	87.527	110.111	112.255	110.111	175.054	87.527	56.128	66.925	66.925	2.908	2.674	2.674	2.132	2.132		175.054	112.255	1.04665
QOSWEB	99.787	180	117.15	117.212	80.212	80.219	99.781	99.788	80.213	117.155	2.367	2.358	2.358	2.508	2.359		180	117.212	1.04647
OJETIH	104.386	109.707	105.162	177.813	74.047	115.047	113.613	74.366	108.118	73.92	2.086	2.059	2.504	2.096	2.084		177.813	115.047	1.0461
YOXFUO	80.3	180	117.194	117.268	99.701	99.693	80.307	80.299	99.7	117.203	2.505	2.167	2.167	1.789	2.168		180	117.268	1.04553
TUPSEE	92.511	51.981	166.246	101.972	51.677	94.271	91.504	103.518	98.564	89.852	3.045	2.311	2.968	3.245	2.29		166.246	103.518	1.04547
CEDBUJ06	99.591	180	117.282	117.282	80.409	80.409	99.591	99.591	80.409	117.282	2.162	1.744	1.744	2.609	1.744		180	117.282	1.0453
VUCYOJ	103.508	101.688	75.386	114.967	113.566	77.438	178.007	105.745	115.299	76.246	2.359	2.407	2.413	2.423	2.76		178.007	115.299	1.04513
VIHLEG	80.397	180	117.285	117.301	99.598	99.597	80.403	80.402	99.603	117.244	2.075	2.437	2.438	2.407	2.438		180	117.301	1.04498
ZEFTAH	99.539	99.539	80.461	117.31	117.31	80.461	180	99.539	117.31	80.461	2.046	2.056	2.056	2.056	2.251		180	117.31	1.04483
JELHIU	80.473	80.473	99.527	117.317	117.317	99.527	180	80.473	117.317	99.527	2.173	2.08	2.08	2.08	2.117		180	117.317	1.04472
SOWCIR	102.575	110.817	110.062	175.869	73.918	113.006	113.188	73.592	106.47	73.231	2.071	2.706	2.523	2.045	2.083		175.869	113.188	1.04468
UMEHUR	178.436	75.428	104.856	103.753	115.206	112.161	76.489	76.224	103.24	115.768	2.278	2.248	2.057	2.088	2.076		178.436	115.768	1.04447
HUSVOI	69.098	69.539	110.405	112.472	105.873	113.791	176.449	69.264	106.178	108.12	2.65	2.364	2.342	2.354	2.574		176.449	113.791	1.0443
ZEFTAH	99.46	99.46	80.54	117.354	117.354	80.54	180	99.46	117.354	80.54	2.086	2.073	2.073	2.073	2.235		180	117.354	1.0441
KIXQUF	80.494	180	117.295	117.324	99.513	99.51	80.49	80.487	99.506	117.359	2.295	1.979	1.978	2.081	1.979		180	117.359	1.04402
VEDZOT	62.595	62.595	117.405	100.499	100.499	117.405	180	62.595	100.499	117.405	2.705	2.486	2.486	2.486	2.306		180	117.405	1.04325
PAJSIF	103.908	101.172	77.448	116.057	115.374	78.122	178.644	100.981	115.899	78.351	2.269	2.052	2.053	2.06	2.186		178.644	116.057	1.04312
XUZTUJ	105.771	102.353	76.154	113.357	115.42	76.193	177.995	103.544	114.526	76.011	2.435	2.098	2.097	2.103	2.717		177.995	115.42	1.04292
GIHWOK	180	99.288	80.712	80.712	117.447	117.447	99.288	99.288	80.712	117.447	2.237	2.048	2.076	2.076	2.076		180	117.447	1.04255
ONUFIO	178.396	101.595	76.68	76.214	114.378	114.119	104.399	104.232	76.844	115.847	2.064	2.34	2.022	2.01	2.015		178.396	115.847	1.04248
DAEAMN	99.275	99.275	80.725	117.454	117.454	80.725	180	99.275	117.454	80.725	2.49	2.267	2.267	2.267	2.19		180	117.454	1.04243
KITLOQ	117.46	80.652	99.342	117.363	80.661	180	99.348	117.428	80.658	99.339	2.099	2.101	2.101	1.843	1.87		180	117.46	1.04233
UTIMUH	177.546	74.989	107.93	104.275	113.446	115.006	74.162	75.835	102.815	112.158	2.868	2.371	2.549	2.55	2.549		177.546	115.006	1.04233
PAJSUR	103.957	101.145	77.55	115.944	115.099	77.879	178.473	101.467	115.937	77.98	2.413	2.056	2.067	2.054	2.193		178.473	115.944	1.04215
VECXEJ	177.478	74.256	104.304	106.485	114.96	112.838	73.185	74.877	106.797	110.599	2.241	1.856	2.222	2.229	2.218		177.478	114.96	1.04197
SINWOC	102.209	101.521	77.931	115.023	115.254	78.239	179.759	102.056	117.252	78.046	2.408	2.087	2.084	2.094	2.262		179.759	117.252	1.04178
ZEFTAH	99.231	99.237	80.769	117.447	117.502	80.763	180	99.233	117.48	80.767	2.075	2.08	2.079	2.079	2.222		180	117.502	1.04163
RUZKUU	88.261	52.365	93.936	169.63	99.227	107.138	54.876	102.097	87.442	91.679	3.16	2.333	2.352	2.91	2.847		169.63	107.138	1.04153
ADOYEY	69.801	69.694	112.497	106.968	111.769	105.295	174.988	70.325	107.851	112.446	2.685	2.346	2.331	2.315	2.26		174.988	112.497	1.04152
IBUTOO	99.224	180	117.453	117.514	80.774	80.78	99.22	99.226	80.776	117.478	1.862	2.034	2.034	2.21	2.035		180	117.514	1.04143
XIZPIG	112.741	104.844	74.269	112.946	102.484	176.109	74.799	113.625	109.257	74.326	2.534	2.539	2.527	1.765	2.402		176.109	113.625	1.0414
YIWKUL	99.141	99.141	80.859	117.525	117.525	80.859	180	99.141	117.525	80.859	2.384	2.073	2.073	2.073	2.04		180	117.525	1.04125
CADWOT10	117.567	99.111	80.892	117.513	99.106	180	80.889	117.548	99.108	80.894	2.311	2.311	2.312	1.912	2.398		180	117.567	1.04055
GABYIS	104.596	116.667	104.963	179.094	75.205	112.298	111.423	74.869	105.7	74.637	2.038	1.978	2.523	1.984	2.018		179.094	116.667	1.04045
ADECOD	108.02	112.694	176.171	107.551	113.752	74.769	74.007	112.521	101.407	74.209	2.002	1.933	2.046	2.024	2.463		176.171	113.752	1.04032
TAVVOE	99.032	99.032	80.968	117.583	117.583	80.968	180	99.032	117.583	80.968	2	2.38	2.38	2.38	2.345		180	117.583	1.04028
DABXIP	81.002	180	117.601	117.601	98.998	98.998	81.002	81.002	98.998	117.601	2.945	1.753	1.753	2.189	1.753		180	117.601	1.03998
DMAECO	98.957	98.957	81.043	117.622	117.622	81.043	180	98.957	117.622	81.043	2.431	2.08	2.08	2.08	2.152		180	117.622	1.03963
LIDSOG	78.934	116.567	80.068	179.527	100.504	117.156	116.307	101.028	79.107	100.361	1.997	2.293	1.907	2.009	2.023		179.527	117.156	1.03952
RACVUM	98.89	180	117.657	117.657	81.11	81.11	98.89	98.89	81.11	117.657	2.399	1.985	1.985	2.182	1.985		180	117.657	1.03905
VEYFEM	81.061	81.066	98.939	117.659	117.607	98.934	180	81.063	117.633	98.937	2.762	2.133	2.133	2.134	1.955		180	117.659	1.03902
DMAECO01	98.836	180	117.685	117.685	81.164	81.164	98.836	98.836	81.164	117.685	2.447	2.137	2.137	2.216	2.137		180	117.685	1.03858
APUDEW	72.287	175.738	107.845	113.431	110.315	103.798	71.966	71.382	109.972	111.019	2.713	2.247	2.239	1.833	2.233		175.738	113.431	1.03845
YOMGUC	98.783	98.783	81.217	117.712	117.712	81.217	180	98.783	117.712	81.217	2.398	1.977	1.977	1.977	2.184		180	117.712	1.03813
QIGNUR	117.717	98.774	81.226	117.717	98.774	180	81.226	117.717	98.774	81.226	1.82	1.82	1.82	2.095	2.478		180	117.717	1.03805
SEZTOG	177.468	76.607	105.348	103.465	115.196	111.593	73.341	75.34	105.922	114.092	2.31	1.78	1.753	1.788	1.765		177.468	115.196	1.03787
EGILOX	98.741	98.741	81.259	117.733	117.733	81.259	180	98.741	117.733	81.259	2.282	2.152	2.152	2.152	2.176		180	117.733	1.03778
HUPKAG	104.863	103.162	75.936	115.358	110.791	76.078	179.111	103.929	116.848	75.988	2.699	2.359	2.337	2.358	2.421		179.111	116.848	1.03772
NAYXEQ	178.93	77.607	103.071	102.24	116.689	114.294	77.635	76.712	102.757	114.97	2.204	1.738	2.043	2.046	2.033		178.93	116.689	1.03735
LOCWOP	117.001	101.772	77.518	115.446	102.56	179.233	78.003	114.735	101.972	78.191	2.027	2.025	2.028	1.735	2.189		179.233	117.001	1.0372
NICFEL	178.334	76.436	104.225	105.545	113.854	116.104	75.541	76.01	102.283	113.057	2.199	2.094	2.067	2.077	2.071		178.334	116.104	1.03717
DAEAFE	98.663	98.663	81.337	117.773	117.773	81.337	180	98.663	117.773	81.337	2.482	2.153	2.153	2.153	2.205		180	117.773	1.03712
DMAECO02	81.336	81.336	98.664	117.773	117.773	98.664	180	81.336	117.773	98.664	2.209	2.134	2.134	2.134	2.451		180	117.773	1.03712
HUPJUZ	103.014	103.063	77.503	114.968	113.005	76.396	179.396	103.092	117.172	76.923	2.507	2.326	2.323	2.31	2.415		179.396	117.172	1.03707
OBEGIN	178.644	102.174	77.692	77.741	114.978	115.913	103.018	100.902	78.465	116.421	2.332	2.339	2.076	2.074	2.084		178.644	116.421	1.03705
CUXKEN	178.702	102.894	76.105	76.432	114.489	112.54	103.641	104.779	76.096	116.481	2.339	2.373	2.029	2.033	2.024		178.702	116.481	1.03702
YEHWIR	179.068	102.614	77.669	77.971	114.491	116.862	101.402	102.561	77.8	115.644	2.296	2.256	1.806	1.803	1.813		179.068	116.862	1.03677
YEPDEC	177.567	106.217	76.558	76.355	113.315	115.214	102.256	102.408	76.216	115.363	2.43	2.378	2.191	2.177	2.182		177.567	115.363	1.03673
EYITEM	178.19	102.249	75.769	75.751	115.986	113.925	104.91	105.393	75.956	112.706	2.306	2.297	2.118	2.112	2.099		178.19	115.986	1.03673
LAHVOF	77.944	115.085	77.474	178.955	102.579	116.754	115.038	102.679	77.845	101.489	1.83	2.282	1.776	1.841	1.836		178.955	116.754	1.03668
HAWXAH	106.887	102.903	74.995	110.561	114.444	75.329	177.914	105.152	115.72	74.793	1.954	2.026	2.028	2.027	2.345		177.914	115.72	1.03657
TESVOC	62.193	180	99.996	99.996	117.807	117.807	62.193	62.193	117.807	99.996	2.583	2.689	2.689	2.292	2.689		180	117.807	1.03655
ICONPB	104.923	108.062	74.14	111.685	115.33	74.404	177.515	103.982	111.926	74.424	2.465	2.351	2.356	2.376	2.726		177.515	115.33	1.03642
SARZER	98.55	98.55	81.45	117.83	117.83	81.45	180	98.55	117.83	81.45	2.096	2.068	2.068	2.068	2.224		180	117.83	1.03617
MODDEQ	70.188	70.451	108.514	109.572	102.891	112.34	177.162	70.235	114.999	108.215	2.606	2.242	2.217	2.23	2.413		177.162	114.999	1.03605
FERHAN	98.517	98.517	81.483	117.846	117.846	81.483	180	98.517	117.846	81.483	1.991	1.97	1.97	1.97	2.174		180	117.846	1.0359
CEDBUJ09	98.49	117.859	98.49	180	81.51	117.859	117.859	81.51	98.49	81.51	1.759	2.205	2.716	1.759	1.759		180	117.859	1.03568
NAFLUD	104.852	73.254	107.736	109.024	72.368	72.907	115.93	111.695	178.037	107.374	2.109	2.101	2.101	2.378	2.125		178.037	115.93	1.03512
ZECVOS	111.026	104.14	73.057	109.557	111.989	73.03	175.848	106.013	113.742	72.721	2.316	2.146	2.135	2.145	2.516		175.848	113.742	1.0351
FIFXAW	94.544	52.68	168.309	97.369	105.854	106.222	93.239	53.243	85.446	80.386	3.215	2.303	2.92	3.075	2.261		168.309	106.222	1.03478
CEDBUJ07	98.378	117.915	98.378	180	81.622	117.915	117.915	81.622	98.378	81.622	1.766	2.181	2.687	1.766	1.766		180	117.915	1.03475
HUPKIO	103.649	105.713	75.132	109.203	115.171	75.353	178.691	105.091	116.612	74.988	2.677	2.402	2.373	2.378	2.489		178.691	116.612	1.03465
VEYDIO	175.903	70.198	107.843	106.254	110.883	109.888	70.691	70.98	113.832	107.898	2.806	1.762	2.25	2.271	2.265		175.903	113.832	1.03452
OBEFUY	178.743	102.861	78.553	78.188	115.244	116.05	100.28	102.003	78.126	116.675	2.356	2.336	2.075	2.097	2.085		178.743	116.675	1.03447
NECZAW	99.89	116.352	99.288	179.679	79.34	117.64	117.24	80.377	100.684	80.424	1.984	2.189	2.304	1.973	1.996		179.679	117.64	1.03398
MIYWUN	100.992	100.776	79.394	116.857	117.142	79.687	179.156	99.939	116.145	79.218	2.436	2.117	2.13	2.124	2.268		179.156	117.142	1.03357
ZAGJEZ	98.211	180	117.966	118.016	81.785	81.79	98.21	98.215	81.789	118.004	2.487	1.957	1.956	2.15	1.957		180	118.016	1.03307
BETPEW	178.674	103.761	75.786	75.82	115.697	116.7	105.077	104.729	74.924	109.392	2.265	2.407	2.008	1.997	2.015		178.674	116.7	1.0329
LETLUU	176.467	106.052	74.922	72.475	114.494	113.211	107.339	104.069	75.143	110.871	1.975	2.401	2.058	2.057	2.057		176.467	114.494	1.03288
TENROW	99.332	51.83	104.175	166.19	91.029	104.221	52.48	92.38	90.493	88.743	3.229	2.274	2.302	3.051	2.948		166.19	104.221	1.03282
NEBLIP	78.816	116.439	81.053	179.679	100.612	116.752	117.711	100.972	79.702	98.847	2.108	2.242	2.128	2.089	2.105		179.679	117.711	1.0328
JAVWAS	61.955	180	99.695	99.695	118.045	118.045	61.955	61.955	118.045	99.695	2.503	2.73	2.73	2.202	2.73		180	118.045	1.03258
WIWJOD	101.968	178.889	111.212	116.276	76.576	76.201	104.783	103.328	77.136	116.957	2.298	1.998	2.037	2.296	2.044		178.889	116.957	1.0322
IFARUF	103.715	178.05	115.031	116.129	75.263	74.192	104.443	106.587	75.802	109.692	1.993	2.079	2.093	2.455	2.101		178.05	116.129	1.03202
EGILIR	98.03	98.03	81.97	118.081	118.081	81.97	180	98.03	118.081	81.97	2.288	2.161	2.161	2.161	2.184		180	118.081	1.03198
XECFET	180	98.077	81.928	81.928	118.077	118.083	98.072	98.072	81.923	118.023	2.45	2.067	2.306	2.305	2.306		180	118.083	1.03195
HEQWIJ	179.518	75.077	104.999	105.945	114.761	117.605	75.176	74.395	104.453	107.921	2.43	1.99	2.069	2.122	2.077		179.518	117.605	1.03188
WUVQUA	81.945	180	118.042	118.049	98.061	98.061	81.939	81.939	98.055	118.112	2.253	2.204	2.202	1.763	2.202		180	118.112	1.03147
QAWGAW	175.481	71.142	113.603	99.197	111.816	113.175	70.733	79.801	105.365	112.666	2.418	2.28	2.235	2.087	2.097		175.481	113.603	1.0313
NIQZAQ	65.596	177.987	102.835	107.091	115.305	116.115	65.578	64.87	112.644	101.467	2.561	2.255	2.253	1.67	2.269		177.987	116.115	1.0312
GIJBIL	102.036	101.389	77.562	117.726	114.557	78.859	179.594	102.103	115.405	78.062	1.828	1.827	1.832	1.833	2.263		179.594	117.726	1.03113
ABEWAH	175.458	72.422	105.201	105.858	112.792	113.6	71.955	72.051	112.101	106.661	2.562	1.857	2.28	2.275	2.279		175.458	113.6	1.03097
MIYXIC	99.585	98.951	80.474	117.448	116.982	80.81	179.75	99.326	117.91	80.856	2.362	2.117	2.11	2.117	2.229		179.75	117.91	1.03067
UTOXUX	118.169	97.841	82.159	118.169	97.841	180	82.159	118.169	97.841	82.159	2.186	2.186	2.186	1.733	2.259		180	118.169	1.03052
ADOYEY	71.158	69.18	112.609	108.474	109.819	112.292	174.427	70.569	109.412	104.039	2.679	2.326	2.313	2.358	2.25		174.427	112.609	1.0303
WAKJEZ	105.282	104.785	75.654	111.313	117.249	74.799	179.063	104.16	112.695	75.374	2.29	2.03	2.034	2.041	2.383		179.063	117.249	1.03023
CEDBUJ08	97.801	118.188	97.801	180	82.199	118.188	118.188	82.199	97.801	82.199	1.781	2.217	2.754	1.781	1.781		180	118.188	1.0302
ALOPOI	101.776	102.45	77.919	117.049	117.475	77.098	179.279	102.93	112.021	77.787	2.278	2.063	2.076	2.068	2.213		179.279	117.475	1.03007
XIPNIW	101.216	99.316	79.746	117.263	117.206	80.159	179.037	99.33	116.76	80.232	1.774	1.908	1.904	1.913	2.162		179.037	117.263	1.02957
MIYXAU	99.949	99.216	80.444	116.943	117.138	80.211	179.415	99.823	117.644	80.358	2.519	2.119	2.116	2.13	2.247		179.415	117.644	1.02952
SINWOC	102.087	99.973	77.657	115.658	116.112	78.324	177.88	103.681	115.785	78.267	2.413	2.085	2.07	2.105	2.256		177.88	116.112	1.02947
HILKES	105.995	103.484	74.908	117.273	115.403	75.8	179.023	104.061	109.082	75.741	2.296	2.032	2.031	2.051	2.407		179.023	117.273	1.02917
ALOPOI	101.473	100.766	78.211	115.194	115.993	77.449	177.743	104.454	115.72	77.643	2.273	2.06	2.064	2.064	2.191		177.743	115.993	1.02917
DOCKUD	101.058	179.562	117.229	113.495	77.891	78.921	101.442	101.709	78.965	117.834	2.146	1.92	1.914	2.225	1.925		179.562	117.834	1.0288
RAWPAJ	61.741	61.725	118.259	99.399	99.433	118.275	180	61.729	99.407	118.271	2.512	2.765	2.764	2.763	1.919		180	118.275	1.02875
PACNAJ	97.562	97.562	82.438	118.296	118.296	82.438	180	97.562	118.296	82.438	2.236	2.004	2.004	2.004	2.209		180	118.296	1.0284
XEZXEH	97.594	118.251	97.599	180	82.404	118.309	118.282	82.406	97.596	82.401	2.039	1.939	2.02	2.038	2.038		180	118.309	1.02818
EXEGAR	178.621	101.858	77.18	78.072	116.933	115.657	104.086	100.842	77.974	114.269	2.59	2.3	1.958	1.971	1.966		178.621	116.933	1.02813
XEZXEH	97.576	118.319	97.573	180	82.422	118.288	118.261	82.424	97.578	82.427	2.046	1.979	1.986	2.046	2.047		180	118.319	1.02802
YUSBOF	179.025	99.261	79.057	79.167	117.029	115.89	100.407	101.807	80.283	117.346	2.647	2.212	1.952	1.959	1.954		179.025	117.346	1.02798
ZAGJAV	179.599	101.251	78.936	79.633	117.934	116.897	101.417	100.033	78.733	114.692	1.993	2.272	1.925	1.926	1.927		179.599	117.934	1.02775
UXELIT	97.545	97.538	82.455	118.35	118.269	82.462	180	97.543	118.295	82.457	1.995	2.097	2.098	2.099	2.265		180	118.35	1.0275
PAJSUR	102.939	103.124	77.587	115.742	114.893	78.26	177.998	100.495	116.351	77.569	2.422	2.064	2.069	2.064	2.217		177.998	116.351	1.02745
QIHNIH	103.159	100.696	78.195	116.616	114.948	77.673	178.256	101.923	115.952	78.323	2.271	2.057	2.046	2.052	2.179		178.256	116.616	1.02733
DAEAZN	97.406	180	118.364	118.364	82.594	82.594	97.406	97.406	82.594	118.364	2.449	2.115	2.115	2.195	2.115		180	118.364	1.02727
MUTYAC	104.615	105.07	75.832	116.648	113.034	76.224	178.266	105.011	111.185	73.347	2.289	2.057	2.102	2.074	2.31		178.266	116.648	1.02697
HAJKUB	97.421	180	118.331	118.385	82.577	82.581	97.419	97.423	82.579	118.358	2.073	2.285	2.284	2.338	2.285		180	118.385	1.02692
MAZREK	98.181	99.193	81.314	117.464	117.741	81.161	179.482	99.095	117.869	81.055	2.407	1.963	1.968	1.967	2.174		179.482	117.869	1.02688
VEYDEK	174.947	70.911	113.336	104.642	106.879	112.152	71.052	70.958	108.707	110.667	2.749	1.757	2.262	2.267	2.27		174.947	113.336	1.02685
PHASNI10	79.279	116.921	78.93	178.688	99.625	117.078	115.514	101.359	79.064	101.76	2.412	2.586	2.345	2.412	2.4		178.688	117.078	1.02683
SIHDUL	178.591	79.184	100.796	101.917	115.688	116.989	78.071	79.377	100.672	116.427	2.117	2.329	2.209	2.208	2.254		178.591	116.989	1.0267
EXEGIZ	177.44	102.552	77.212	76.313	114.423	115.841	105.188	101.721	76.97	114.651	2.478	2.388	2	1.99	1.98		177.44	115.841	1.02665
VIHLEG	82.643	180	118.411	118.396	97.353	97.354	82.646	82.647	97.357	118.353	2.112	2.402	2.403	2.416	2.403		180	118.411	1.02648
GIWXOZ	98.8	99.978	80.57	117.661	117.351	80.693	179.247	99.663	117.015	80.298	2.389	1.97	1.965	1.966	2.179		179.247	117.661	1.02643
UMEJAZ	103.737	105.042	75.931	116.77	110.283	76.506	178.35	103.23	115.948	75.587	2.272	2.058	2.079	2.057	2.266		178.35	116.77	1.02633
SIYSIC	177.207	76.511	104.021	104.98	112.001	113.927	73.186	76.53	104.873	115.63	2.326	1.776	1.775	1.77	1.77		177.207	115.63	1.02628
IXUCOV	103.756	100.632	116.446	77.003	77.391	115.603	103.956	178.014	113.656	77.204	2.65	2.056	2.203	2.073	2.066		178.014	116.446	1.02613
GEGHOS	99.432	115.044	179.553	101.487	116.958	79.099	80.135	117.991	101.007	78.832	2.455	2.025	2.461	2.463	2.398		179.553	117.991	1.02603
RANHEU	98.536	117.205	100.374	179.181	80.611	117.623	117.048	80.645	99.796	80.03	2.003	1.947	2.212	1.989	1.976		179.181	117.623	1.02597
WIWJIX	103.78	178.947	113.455	114.014	76.489	76.703	102.787	103.012	77.272	117.39	2.284	2.032	2.038	2.337	2.006		178.947	117.39	1.02595
ZALCUN	178.544	73.775	107.685	105.177	107.297	112.572	73.481	73.436	106.382	116.994	2.433	1.995	2.01	2.038	2.029		178.544	116.994	1.02583
QIRWIZ	97.187	97.187	82.813	118.458	118.458	82.813	180	97.187	118.458	82.813	2.335	2.22	2.22	2.22	2.114		180	118.458	1.0257
TAVDUS	104.909	105.133	76.349	114.916	115.937	76.192	177.459	100.863	113.045	76.597	1.984	2.025	2.001	2.015	2.291		177.459	115.937	1.02537
YIXCIS	82.865	180	118.481	118.481	97.135	97.135	82.865	82.865	97.135	118.481	2.317	2.424	2.424	2.607	2.424		180	118.481	1.02532
WUVPAF	179.171	99.078	79.345	80.469	116.048	117.666	100.664	100.24	80.205	117.439	2.095	2.307	2.378	2.404	2.377		179.171	117.666	1.02508
RATCEW	118.247	116.183	79.685	100.196	99.848	80.401	80.161	99.712	116.856	179.75	2.071	2.07	2.061	2.08	2.312		179.75	118.247	1.02505
HUTQOC	99.344	118.275	98.914	179.778	80.926	116.354	117.987	80.461	99.083	81.276	1.983	1.964	2.188	1.973	1.976		179.778	118.275	1.02505
SIHDUL	178.546	78.001	101.712	100.529	117.047	116.907	79.406	79.747	100.629	115.474	2.101	2.303	2.218	2.249	2.207		178.546	117.047	1.02498
ONUGAH	97.225	97.227	82.795	118.414	118.437	82.785	179.967	97.222	118.476	82.745	2.412	1.878	1.879	1.878	2.135		179.967	118.476	1.02485
IXUCOV01	100.68	177.914	113.847	115.567	77.319	77.225	103.659	103.825	77.237	116.424	2.655	2.077	2.07	2.192	2.063		177.914	116.424	1.02483
HUMFEB	98.8	98.914	80.879	117.381	117.197	80.494	179.074	100.459	117.596	80.454	2.048	2.124	2.126	2.131	2.279		179.074	117.596	1.02463
BOHPAR	175.541	72.349	112.412	105.571	108.924	114.068	71.97	72.942	104.518	110.826	2.632	1.816	2.271	2.266	2.288		175.541	114.068	1.02455
ONUFIO	179.441	103.141	77.485	77.001	117.972	112.73	102.882	103.188	76.315	114.395	2.046	2.329	2.022	2.022	2.013		179.441	117.972	1.02448
GOGJAN08	97.011	118.532	97.011	180	82.989	118.532	118.532	82.989	97.011	82.989	1.753	2.281	2.656	1.753	1.753		180	118.532	1.02447
RAQCUI	82.919	180	118.464	118.503	97.087	97.084	82.916	82.913	97.081	118.538	2.117	2.166	2.165	2.009	2.166		180	118.538	1.02437
RAQCUI	82.971	180	118.543	118.482	97.03	97.034	82.966	82.97	97.029	118.547	2.096	2.197	2.196	2.002	2.195		180	118.547	1.02422
ARAVUL	104.243	102.177	74.979	112.343	115.11	75.262	176.557	108.409	113.299	74.897	2.1	2.044	2.044	2.046	2.494		176.557	115.11	1.02412
ZITYUW	96.947	180	118.559	118.559	83.053	83.053	96.947	96.947	83.053	118.559	2.168	2.19	2.19	1.889	2.19		180	118.559	1.02402
HUPJEJ	99.781	99.786	80.928	117.722	117.581	80.255	179.162	98.859	116.734	80.397	2.483	2.113	2.115	2.102	2.298		179.162	117.722	1.024
ABEWEL	83.091	83.091	96.909	118.574	118.574	96.909	180	83.091	118.574	96.909	2.755	2.085	2.085	2.085	2.351		180	118.574	1.02377
EMEROE	98.003	117.896	98.059	179.755	81.901	118.334	117.877	81.98	98.319	81.738	2.195	1.795	2.236	2.2	2.194		179.755	118.334	1.02368
TEMTOU	96.861	180	118.594	118.594	83.139	83.139	96.861	96.861	83.139	118.594	2.081	1.94	1.94	2.149	1.94		180	118.594	1.02343
VEYDEK	80.774	80.405	98.709	117.551	118.062	99.721	179.464	80.388	116.416	99.995	2.749	2.126	2.147	2.145	1.913		179.464	118.062	1.02337
AJEGIF	80.44	118.005	80.835	179.406	99.73	116.483	117.348	99.302	79.942	99.757	1.967	2.442	1.916	1.993	1.949		179.406	118.005	1.02335
GIHWIE	103.629	113.199	177.994	103.996	111.134	74.896	75.131	116.597	107.088	75.35	2.071	2.398	2.083	2.089	2.437		177.994	116.597	1.02328
JUVVAX	179.109	100.354	79.968	80.632	116.585	117.718	99.234	99.426	80.393	117.407	1.836	2.244	2.012	2.004	2.012		179.109	117.718	1.02318
QALZOT01	101.162	101.631	116.862	77.63	77.858	114.406	104.316	178.25	115.344	77.396	2.272	2.048	2.186	2.05	2.058		178.25	116.862	1.02313
GOGJAN07	96.81	118.614	96.81	180	83.19	118.614	118.614	83.19	96.81	83.19	1.765	2.289	2.674	1.765	1.765		180	118.614	1.0231
XEZXEH	96.792	118.621	96.792	180	83.208	118.621	118.621	83.208	96.792	83.208	2.03	1.931	2.017	2.03	2.03		180	118.621	1.02298
HIGWOM	118.623	96.788	83.212	118.623	96.788	180	83.212	118.623	96.788	83.212	2.28	2.28	2.28	1.794	2.252		180	118.623	1.02295
ACIMEG	104.426	112.986	102.432	178.16	77.264	114.562	116.819	76.793	103.38	75.751	2.052	1.977	2.289	2.031	2.037		178.16	116.819	1.02235
XANNOQ	104.841	112.702	178.243	103.536	116.908	76.198	76.693	114.417	102.328	76.442	2.032	1.97	2.048	2.057	2.277		178.243	116.908	1.02225
VEQFUT	97.534	118.181	97.654	179.667	82.237	118.105	118.358	82.488	98.04	82.047	1.871	1.676	2.132	1.88	1.876		179.667	118.358	1.02182
TESVOC	61.307	180	98.872	98.872	118.693	118.693	61.307	61.307	118.693	98.872	2.594	2.695	2.695	2.292	2.695		180	118.693	1.02178
MIYWUN	100.166	99.432	79.275	117.5	116.158	79.907	178.787	102.007	116.535	79.204	2.43	2.127	2.116	2.114	2.272		178.787	117.5	1.02145
JUTNET	102.638	107.26	73.954	115.277	110.555	73.978	176.551	107.314	113.021	74.949	2.26	2.041	2.043	2.049	2.423		176.551	115.277	1.02123
EPUSUF	102.885	52.8	165.886	94.002	51.96	88.395	91.214	104.619	100.591	82.919	2.975	2.32	3.075	3.238	2.317		165.886	104.619	1.02112
ZALCOH	178.317	75.382	105.898	104.962	114.15	110.17	75.429	75.151	103.109	117.054	2.338	1.99	2.034	2.034	2.029		178.317	117.054	1.02105
WABJUF	176.563	69.728	111.224	115.309	104.186	111.711	67.395	68.109	108.453	105.795	2.59	2.315	2.727	2.711	2.718		176.563	115.309	1.0209
WUSDEV	80.957	117.637	81.351	179.257	98.479	117.327	118.03	98.759	81.068	99.385	2.187	2.3	1.792	2.188	2.192		179.257	118.03	1.02045
SENCEV	96.48	180	118.743	118.71	83.518	83.516	96.484	96.482	83.52	118.776	1.859	1.918	1.917	2.962	1.916		180	118.776	1.0204
MIYXIC	100.256	98.636	80.706	117.802	117.156	81.037	179.021	98.177	117.799	81.179	2.371	2.104	2.092	2.125	2.224		179.021	117.802	1.02032
TENROW	98.993	51.372	92.024	164.342	91.665	103.125	51.834	95.407	102.109	92.052	3.24	2.279	2.312	3.025	3.008		164.342	103.125	1.02028
EVOWAO	179.352	99.742	80.987	80.737	116.578	117.872	98.522	99.15	80.87	118.136	2.139	2.116	1.957	1.951	1.96		179.352	118.136	1.02027
EQUFUT	67.679	177.437	58.345	58.345	96.916	96.916	81.762	81.762	109.757	116.222	1.999	3.031	2.773	2.072	2.773		177.437	116.222	1.02025
GOGJAN06	96.352	118.793	96.352	180	83.648	118.793	118.793	83.648	96.352	83.648	1.752	2.299	2.694	1.752	1.752		180	118.793	1.02012
ALOPIC	101.675	103.192	77.54	115.188	115.149	78.487	178.318	101.01	117.113	78.073	2.32	2.06	2.08	2.069	2.171		178.318	117.113	1.02008
SENCAR	96.433	180	118.725	118.761	83.562	83.564	96.436	96.438	83.567	118.796	1.738	1.781	1.78	2.804	1.78		180	118.796	1.02007
HUMFEB	99.641	99.633	81.187	117.679	117.649	80.618	178.88	98.973	116.807	79.959	2.041	2.12	2.14	2.129	2.273		178.88	117.679	1.02002
TESVOC	61.2	180	98.736	98.736	118.8	118.8	61.2	61.2	118.8	98.736	2.594	2.698	2.698	2.298	2.698		180	118.8	1.02
CIWVAG	179.395	101.95	78.943	78.532	117.568	118.203	100.968	100.971	78.604	112.969	2.021	2.215	2.06	2.048	2.053		179.395	118.203	1.01987
MUCKOK	74.908	75.858	104.51	109.501	118.242	104.401	179.417	74.848	113.363	105.431	2.404	2.024	2.06	2.038	2.272		179.417	118.242	1.01958
ZOKMIV	179.121	73.563	105.102	106.691	117.954	109.627	74.141	73.246	107.175	109.472	2.54	1.963	2.023	2.023	2.023		179.121	117.954	1.01945
RANLIC	78.825	79.604	115.815	101.27	99.49	116.029	79.1	178.995	117.83	101.723	2.301	1.908	1.773	1.881	1.904		178.995	117.83	1.01942
VIPNUF	100.513	179.236	117.537	118.073	80.283	79.476	101.236	99.138	79.359	115.014	1.748	2.051	2.025	2.251	2.035		179.236	118.073	1.01938
FIVDUK	99.26	116.825	99.455	178.869	80.923	117.457	117.714	79.623	99.785	80.955	2.002	2.169	2.206	2.011	1.998		178.869	117.714	1.01925
TIVNUJ01	96.189	96.189	83.811	118.853	118.853	83.811	180	96.189	118.853	83.811	2.282	2.143	2.143	2.143	2.072		180	118.853	1.01912
GEYPAB	83.838	83.838	96.162	118.863	118.863	96.162	180	83.838	118.863	96.162	2.282	1.803	1.803	1.803	1.841		180	118.863	1.01895
HUVLAM	177.421	78.008	101.376	99.958	114.965	116.286	77.591	78.51	104.549	116.203	2.158	2.039	2.101	2.081	2.096		177.421	116.286	1.01892
FOKJEV	178.632	106.245	85.017	70.381	113.958	111.4	96.233	109.432	72.733	117.499	2.428	2.723	2.071	2.06	2.41		178.632	117.499	1.01888
DIDYOF	178.998	102.332	78.395	78.775	113.993	117.865	101.907	100.248	78.316	116.503	2.445	2.187	2.028	2.029	2.006		178.998	117.865	1.01888
NOFJOI	103.174	100.751	77.447	115.696	113.728	78.136	178.887	102.337	117.758	78.149	1.876	2.018	2.022	2.025	2.194		178.887	117.758	1.01882
TAXBEC	53.649	53.649	93.744	93.111	93.744	93.111	95.789	95.789	107.299	168.422	3.079	3.011	2.31	3.011	2.31		168.422	107.299	1.01872
NAWWAK	118.878	96.121	83.879	118.878	96.121	180	83.879	118.878	96.121	83.879	2.302	2.302	2.302	2.275	2.27		180	118.878	1.0187
CUPCOF01	96.148	180	118.879	118.88	83.854	83.854	96.146	96.146	83.852	118.847	2.239	2.073	2.073	2.011	2.073		180	118.88	1.01867
LIMBAL	175.44	111.019	73.42	73.893	112.919	114.322	103.475	104.461	73.47	109.792	2.726	2.526	2.049	2.072	2.057		175.44	114.322	1.01863
TAMCUG01	83.901	180	118.886	118.886	96.099	96.099	83.901	83.901	96.099	118.886	1.958	2.42	2.42	2.203	2.42		180	118.886	1.01857
MALWAX	118.899	96.062	83.938	118.899	96.062	180	83.938	118.899	96.062	83.938	2.299	2.299	2.299	2.143	2.252		180	118.899	1.01835
FUTWOH	118.864	96.091	83.911	118.89	96.092	180	83.909	118.912	96.089	83.908	2.326	2.327	2.325	1.997	2.217		180	118.912	1.01813
TIVNUJ	96.021	96.021	83.979	118.914	118.914	83.979	180	96.021	118.914	83.979	2.275	2.13	2.13	2.13	2.064		180	118.914	1.0181
EXEGIZ	105.636	102.172	76.975	114.742	116.301	76.485	177.387	102.204	113.517	76.574	2.463	1.972	1.988	2.013	2.362		177.387	116.301	1.0181
CAHPOQ	98.562	61.065	118.935	98.562	61.065	180	118.935	98.562	61.065	118.935	2.68	2.68	2.68	2.593	2.223		180	118.935	1.01775
ACIMIK	102.717	114.532	105.744	178.195	76.459	117.133	112.235	76.665	102.366	76.045	2.042	1.958	2.286	2.049	2.033		178.195	117.133	1.0177
MIRNUY	104.88	177.46	115.364	114.145	77.416	77.224	102.892	100.345	77.245	116.404	1.924	2.067	2.05	2.202	2.052		177.46	116.404	1.0176
HEJJIR	83.975	83.975	96.025	118.944	118.94	96.025	180	83.969	118.852	96.031	2.286	1.806	1.804	1.806	1.933		180	118.944	1.0176
SIYTEZ	96.012	180	118.911	118.892	83.985	83.984	96.016	96.015	83.988	118.947	2.449	2.326	2.325	2.198	2.324		180	118.947	1.01755
VERPEO	179.618	97.723	83.104	82.692	118.218	118.586	96.514	97.495	82.471	118.498	2.251	2.123	1.894	1.886	1.876		179.618	118.586	1.0172
GEYPAB	84.141	84.141	95.859	118.971	118.971	95.859	180	84.141	118.971	95.859	2.291	1.803	1.803	1.803	1.853		180	118.971	1.01715
HUPJIN	98.555	97.81	81.792	117.766	118.063	81.282	179.085	98.922	117.841	81.639	2.567	2.115	2.112	2.132	2.272		179.085	118.063	1.01703
JONKUS	77.589	77.727	103.555	111.721	117.502	102.46	178.522	77.294	117.186	101.363	2.117	1.921	1.936	1.967	1.78		178.522	117.502	1.017
XIPNAO	100.812	99.805	117.533	80.075	80.335	117.888	98.824	178.9	116.056	80.166	1.779	1.914	2.155	1.913	1.913		178.9	117.888	1.01687
ROBWOV	95.807	180	118.989	118.989	84.193	84.193	95.807	95.807	84.193	118.989	2.317	2.149	2.149	2.062	2.149		180	118.989	1.01685
HUPJUZ	101.051	104.733	76.938	114.067	114.067	76.83	177.905	103.548	116.896	76.899	2.521	2.306	2.306	2.33	2.44		177.905	116.896	1.01682
DMAENI	95.777	95.777	84.223	119	119	84.223	180	95.777	119	84.223	2.467	2.135	2.135	2.135	2.104		180	119	1.01667
ARAVUL	102	102.029	75.953	114.906	114.514	75.828	175.902	107.804	113.67	76.294	2.071	2.078	2.057	2.062	2.425		175.902	114.906	1.0166
PIHVOR	84.243	180	119.006	119.006	95.757	95.757	84.243	84.243	95.757	119.006	2.004	2.184	2.184	1.959	2.184		180	119.006	1.01657
PIHVOR10	84.243	180	119.006	119.006	95.757	95.757	84.243	84.243	95.757	119.006	2.004	2.184	2.184	1.959	2.184		180	119.006	1.01657
JUVVAX	178.491	101.105	80.015	80.677	116.688	117.503	98.749	99.194	80.267	117.502	1.827	2.259	1.999	2.001	1.996		178.491	117.503	1.01647
VIYXIL	75.63	115.889	176.872	75.43	111.432	106.612	102.597	115.353	76.513	103.268	2.061	2.384	2.048	2.036	2.43		176.872	115.889	1.01638
QALZOT01	103.323	113.24	178.568	103.429	115.311	77.603	77.269	117.586	100.966	77.347	2.061	2.276	2.068	2.058	2.21		178.568	117.586	1.01637
HAWXEL	107.511	103.792	74.566	116.81	113.118	74.638	177.791	105.488	109.084	73.939	2.26	2.036	2.039	2.052	2.388		177.791	116.81	1.01635
QEVDAX	84.228	180	119.024	119.001	95.769	95.77	84.23	84.231	95.772	118.98	2.038	2.122	2.123	1.927	2.122		180	119.024	1.01627
SIQLEJ	84.299	180	119.025	119.025	95.701	95.701	84.299	84.299	95.701	119.025	2.617	1.749	1.749	2.216	1.749		180	119.025	1.01625
TUFPEP	99.33	117.556	98.408	179.362	81.242	117.178	118.393	81.278	98.623	81.115	1.988	1.99	2.196	1.994	1.995		179.362	118.393	1.01615
TUFPEP01	99.33	117.556	98.408	179.362	81.242	117.178	118.393	81.278	98.623	81.115	1.988	1.99	2.196	1.994	1.995		179.362	118.393	1.01615
LETLUU	178.296	103.94	75.166	74.263	114.228	109.792	106.048	104.063	76.621	117.337	1.962	2.416	2.06	2.049	2.041		178.296	117.337	1.01598
UWENOB	99.303	118.101	101.214	179.053	80.314	116.048	116.744	79.783	99.943	79.456	2.34	1.973	2.306	2.337	2.349		179.053	118.101	1.01587
SIYTOJ	95.722	180	118.994	119.05	84.277	84.28	95.72	95.723	84.278	119.012	2.678	2.316	2.315	2.194	2.317		180	119.05	1.01583
GOGJAN05	95.567	119.07	95.567	180	84.433	119.07	119.07	84.433	95.567	84.433	1.777	2.295	2.65	1.777	1.777		180	119.07	1.0155
XIVKOD	102.536	104.994	75.956	113.872	117.496	76.117	178.417	104.421	111.609	75.896	2.388	2.073	2.069	2.057	2.338		178.417	117.496	1.01535
VEYFIQ	176.555	72.412	104.379	111.353	113.452	105.18	73.397	72.078	105.959	115.641	2.711	1.773	2.261	2.256	2.243		176.555	115.641	1.01523
TAMCUG	119.095	84.508	95.492	119.095	84.508	180	95.492	119.095	84.508	95.492	2.433	2.433	2.433	1.946	2.17		180	119.095	1.01508
HAWTUX	84.434	84.431	95.566	119.042	119.096	95.569	180	84.433	119.073	95.567	2.468	2.384	2.384	2.383	2.436		180	119.096	1.01507
SIYTID	95.577	180	119.06	119.042	84.421	84.42	95.58	95.579	84.423	119.097	2.54	2.32	2.319	2.187	2.319		180	119.097	1.01505
TUFNUD	100.601	117.59	99.016	178.493	80.868	116.714	116.808	79.381	100.437	79.685	2.017	1.84	2.253	2.027	1.979		178.493	117.59	1.01505
TUFNUD01	100.601	117.59	99.016	178.493	80.868	116.714	116.808	79.381	100.437	79.685	2.017	1.84	2.253	2.027	1.979		178.493	117.59	1.01505
GOMJAT	84.35	179.966	119.008	119.072	95.684	95.622	84.351	84.348	95.646	119.047	2.506	2.338	2.337	3.048	2.339		179.966	119.072	1.0149
IFIXIE	109.751	78.249	105.251	116.91	76.906	178.895	102.586	118.003	75.059	102.034	2.024	2.002	2.009	2.448	1.964		178.895	118.003	1.01487
SAJJOC	119.108	95.454	84.546	119.108	95.454	180	84.546	119.108	95.454	84.546	2.357	2.357	2.357	2.104	2.235		180	119.108	1.01487
LIWZEX	98.787	98.498	80.743	116.31	118.382	81.335	179.332	99.074	118.44	81.567	1.92	1.999	1.944	1.949	2.406		179.332	118.44	1.01487
EFIJEK	104.92	103.719	109.568	76.03	73.719	115.011	105.856	177.383	116.492	75.943	2.488	2.313	2.482	2.363	2.414		177.383	116.492	1.01485
CEDBUJ05	95.431	180	119.115	119.115	84.569	84.569	95.431	95.431	84.569	119.115	2.214	1.762	1.762	2.669	1.762		180	119.115	1.01475
LAQLUK	95.448	95.451	84.552	119.083	119.123	84.549	180	95.448	119.121	84.552	2.233	2.186	2.186	2.185	2.041		180	119.123	1.01462
IJEBOO	178.986	77.376	101.805	102.043	114.255	118.114	77.46	77.689	103.61	113.979	2.356	2.266	2.34	2.308	2.339		178.986	118.114	1.01453
WIVVIG	84.619	180	119.131	119.131	95.381	95.381	84.619	84.619	95.381	119.131	1.634	2.287	2.287	1.908	2.287		180	119.131	1.01448
UROVIH	95.378	95.378	84.622	119.132	119.132	84.622	180	95.378	119.132	84.622	2.259	2.149	2.149	2.149	2.055		180	119.132	1.01447
PAJSUR	77.498	118.471	179.337	78.335	112.779	102.437	101.845	115.982	77.996	101.919	2.075	2.19	2.055	2.064	2.409		179.337	118.471	1.01443
GOGHIT	101.222	103.392	76.799	115.522	117.119	77.164	177.979	103.461	113.255	77.886	2.276	2.083	2.073	2.054	2.282		177.979	117.119	1.01433
PAJSIF	103.171	100.726	77.835	117.606	114.524	77.77	178.46	103.442	114.275	76.995	2.276	2.058	2.061	2.05	2.212		178.46	117.606	1.01423
WEMBUO	118.387	81.629	101.457	115.942	77.221	179.232	98.992	115.313	78.606	102.085	1.99	2.041	2.058	2.276	2.023		179.232	118.387	1.01408
HIDKOV	81.636	118.7	81.705	179.545	97.699	117.124	118.112	98.776	81.924	98.255	1.817	2.327	1.798	1.812	1.818		179.545	118.7	1.01408
VEQFON	179.485	97.706	83.029	82.575	118.102	118.474	96.464	97.757	82.47	118.644	2.233	2.129	1.893	1.883	1.88		179.485	118.644	1.01402
DMAECU	95.29	95.29	84.71	119.16	119.16	84.71	180	95.29	119.16	84.71	2.392	2.143	2.143	2.143	2.069		180	119.16	1.014
UTOYIM	78.276	114.757	178.297	78.294	117.466	99.458	101.73	116.226	79.038	103.17	2.469	2.409	2.465	2.465	2.208		178.297	117.466	1.01385
CPPOCU01	84.744	84.744	95.256	119.171	119.171	95.256	180	84.744	119.171	95.256	1.9	2.387	2.387	2.387	1.879		180	119.171	1.01382
JOSQOX	95.249	180	119.173	119.173	84.751	84.751	95.249	95.249	84.751	119.173	2.217	2.011	2.011	2.93	2.011		180	119.173	1.01378
DMAECU01	95.239	95.239	84.761	119.176	119.176	84.761	180	95.239	119.176	84.761	2.393	2.144	2.144	2.144	2.036		180	119.176	1.01373
IWAWIN	119.176	95.239	84.761	119.176	95.239	180	84.761	119.176	95.239	84.761	2.413	2.413	2.413	2.005	1.92		180	119.176	1.01373
KIJJAO	119.177	95.235	84.765	119.177	95.235	180	84.765	119.177	95.235	84.765	2.316	2.316	2.316	1.835	2.164		180	119.177	1.01372
VEYGOX	96.028	118.374	179.923	96.836	118.864	83.719	83.904	119.104	96.284	83.228	2.323	2.003	2.33	2.33	2.217		179.923	119.104	1.01365
ABEVEK	84.693	84.696	95.307	119.183	119.127	95.304	180	84.695	119.155	95.305	2.684	2.106	2.106	2.107	2.397		180	119.183	1.01362
TESVOC	60.814	180	98.239	98.239	119.186	119.186	60.814	60.814	119.186	98.239	2.583	2.724	2.724	2.286	2.724		180	119.186	1.01357
DMAECU02	95.19	180	119.191	119.191	84.81	84.81	95.19	95.19	84.81	119.191	2.402	2.153	2.153	2.046	2.153		180	119.191	1.01348
AMECUA	95.144	95.144	84.856	119.205	119.205	84.856	180	95.144	119.205	84.856	2.022	2.081	2.081	2.081	2.042		180	119.205	1.01325
VOVFAN	84.858	180	119.206	119.206	95.142	95.142	84.858	84.858	95.142	119.206	2.218	1.999	1.999	2.448	1.999		180	119.206	1.01323
HUPJEJ	98.683	98.819	80.489	117.997	117.274	80.815	178.789	100.713	116.871	80.47	2.47	2.123	2.11	2.094	2.295		178.789	117.997	1.0132
ULUXEG	95.25	95.245	84.75	119.232	119.129	84.755	180	95.249	119.159	84.751	1.949	1.999	1.999	2.001	2.132		180	119.232	1.0128
MUKBAV	84.9	180	119.196	119.237	95.101	95.099	84.901	84.899	95.1	119.224	2.02	2.16	2.159	1.938	2.16		180	119.237	1.01272
CESFEM	82.997	82.325	96.573	118.425	118.185	97.575	179.435	82.902	118.674	97.63	2.149	1.952	1.958	1.955	2.162		179.435	118.674	1.01268
IGUZUF	102.949	101.433	77.006	118.001	113.847	77.502	178.761	103.428	114.231	77.633	2.276	2.066	2.06	2.062	2.216		178.761	118.001	1.01267
DUMZEQ01	84.973	119.241	84.973	180	95.027	119.241	119.241	95.027	84.973	95.027	1.909	2.845	2.307	1.909	1.909		180	119.241	1.01265
YUZPEP	100.211	102.499	78.227	116.022	117.337	79.225	178.093	100.361	115.929	79.452	1.756	1.954	1.976	1.979	2.241		178.093	117.337	1.0126
OKAXUT	179.423	98.322	82.553	82.01	118.44	117.485	97.556	97.446	82.119	118.676	2.078	2.25	1.881	1.878	1.878		179.423	118.676	1.01245
DOCKUD	100.322	178.684	115.082	116.541	78.678	78.977	102.161	100.161	79.716	117.939	2.135	1.924	1.925	2.216	1.925		178.684	117.939	1.01242
EBEQIO	95.17	180	119.181	119.153	84.826	84.825	95.175	95.174	84.83	119.256	2.015	1.982	1.98	2.147	1.98		180	119.256	1.0124
JUVVEB	101.011	116.2	98.93	178.711	79.584	117.04	117.968	80.263	99.963	80.248	1.989	1.796	2.235	1.988	1.976		178.711	117.968	1.01238
CEDBUJ04	94.937	119.268	94.937	180	85.063	119.268	119.268	85.063	94.937	85.063	1.785	2.189	2.653	1.785	1.785		180	119.268	1.0122
ZUCTUM	118.27	101.617	117.853	179.5	61.398	100.618	95.718	61.243	118.776	62.455	2.716	2.252	2.548	2.682	2.691		179.5	118.776	1.01207
CEWRIF10	119.278	94.904	85.096	119.278	94.904	180	85.096	119.278	94.904	85.096	2.211	2.211	2.211	2.105	2.127		180	119.278	1.01203
GOGJAN19	85.103	180	119.28	119.28	94.897	94.897	85.103	85.103	94.897	119.28	2.636	1.786	1.786	2.29	1.786		180	119.28	1.012
NECYOJ	105.779	116.096	102.037	177.026	77.913	113.904	116.308	76.909	99.617	77.639	1.992	2.167	2.422	1.987	2.011		177.026	116.308	1.01197
SIQLIN	85.099	180	119.274	119.278	94.901	94.901	85.099	85.099	94.901	119.283	2.471	1.77	1.77	2.238	1.77		180	119.283	1.01195
CEDBUJ03	94.871	119.287	94.871	180	85.129	119.287	119.287	85.129	94.871	85.129	1.783	2.187	2.651	1.783	1.783		180	119.287	1.01188
CEDBUJ09	85.137	119.289	85.137	180	94.863	119.289	119.289	94.863	85.137	94.863	1.76	2.141	2.716	1.76	1.76		180	119.289	1.01185
PEGJUG	80.812	82.538	99.761	118.634	117.897	96.888	179.336	81.786	117.34	98.207	2.63	1.781	1.776	1.776	1.795		179.336	118.634	1.0117
PEGJUG10	80.812	82.538	99.761	118.634	117.897	96.888	179.336	81.786	117.34	98.207	2.63	1.781	1.776	1.776	1.795		179.336	118.634	1.0117
AYUBEB	85.187	85.187	94.813	119.304	119.304	94.813	180	85.187	119.304	94.813	2.45	2.422	2.422	2.422	2.448		180	119.304	1.0116
GOGJAN18	85.188	180	119.304	119.304	94.812	94.812	85.188	85.188	94.812	119.304	2.636	1.788	1.788	2.29	1.788		180	119.304	1.0116
OXCLPC	119.306	85.194	94.806	119.306	85.194	180	94.806	119.306	85.194	94.806	2.442	2.442	2.442	1.895	1.935		180	119.306	1.01157
WUVPAF	178.825	99.535	80.037	80.252	117.301	118.136	99.608	100.901	79.688	115.694	2.084	2.308	2.38	2.372	2.407		178.825	118.136	1.01148
PAJSIF	101.452	102.05	77.585	116.107	112.673	78.053	178.917	103.067	118.229	77.849	2.263	2.068	2.048	2.052	2.184		178.917	118.229	1.01147
FAJWOD	79.224	116.561	83.031	177.249	108.979	115.386	116.488	98.343	73.401	96.997	2.329	1.661	1.942	2.343	2.327		177.249	116.561	1.01147
MIQGAW	94.886	94.888	85.114	119.242	119.29	85.112	180	94.885	119.316	85.115	2.294	1.923	1.923	1.922	2.135		180	119.316	1.0114
YOXLII	97.121	118.488	97.253	179.659	83.349	118.975	118.235	83.21	96.414	82.656	1.955	2.114	2.162	1.951	1.967		179.659	118.975	1.0114
VUCYUP	95.233	95.468	84.763	119.094	119.167	84.651	179.864	95.287	119.181	84.597	2.323	1.923	1.926	1.923	2.167		179.864	119.181	1.01138
SINWIW	103.375	103.583	77.543	113.911	115.035	77.43	177.993	100.589	117.312	77.404	2.64	2.068	2.095	2.084	2.238		177.993	117.312	1.01135
MIWZEY	176.608	106.132	76.076	76.835	112.62	115.93	101.057	103.067	76.908	115.837	2.588	2.388	2.204	2.209	2.255		176.608	115.93	1.0113
GOGJAN04	94.745	119.323	94.745	180	85.255	119.323	119.323	85.255	94.745	85.255	1.768	2.29	2.629	1.768	1.768		180	119.323	1.01128
CEDBUJ24	94.729	119.328	94.729	180	85.271	119.328	119.328	85.271	94.729	85.271	1.785	2.189	2.651	1.785	1.785		180	119.328	1.0112
WOHPOY	109.473	103.815	74.705	108.867	113.789	73.758	175.818	105.093	115.15	73.222	2.28	2.009	2.047	2.067	2.549		175.818	115.15	1.01113
YOLYIH	85.313	180	119.34	119.34	94.687	94.687	85.313	85.313	94.687	119.34	2.418	2.028	2.028	2.058	2.028		180	119.34	1.011
CEDBUJ02	94.681	119.341	94.681	180	85.319	119.341	119.341	85.319	94.681	85.319	1.783	2.188	2.649	1.783	1.783		180	119.341	1.01098
GOGJAN02	94.682	94.682	85.318	119.341	119.341	85.318	180	94.682	119.341	85.318	2.295	1.789	1.789	1.789	2.643		180	119.341	1.01098
BURFEA	176.639	77.02	105.53	101.442	115.981	114.597	77.826	76.716	101.489	115.099	2.351	1.803	1.841	1.833	1.84		176.639	115.981	1.01097
CEDBUJ23	94.669	119.345	94.669	180	85.331	119.345	119.345	85.331	94.669	85.331	1.786	2.189	2.65	1.786	1.786		180	119.345	1.01092
GOGJAN17	85.341	180	119.347	119.347	94.659	94.659	85.341	85.341	94.659	119.347	2.636	1.787	1.787	2.291	1.787		180	119.347	1.01088
TUFNUD	101.49	117.168	99.141	178.691	79.641	118.042	115.574	79.775	100.005	79.96	1.998	1.877	2.215	2.009	2		178.691	118.042	1.01082
TUFNUD01	101.49	117.168	99.141	178.691	79.641	118.042	115.574	79.775	100.005	79.96	1.998	1.877	2.215	2.009	2		178.691	118.042	1.01082
VEYGAJ	174.165	72.08	103.984	113.328	113.517	106.346	71.799	72.346	105.878	112.993	2.597	1.78	2.273	2.274	2.276		174.165	113.517	1.0108
WIKCAW	105.402	108.358	116.666	73.9	74.256	110.002	104.819	177.313	111.016	73.432	2.194	2.089	2.517	2.072	2.064		177.313	116.666	1.01078
ZAGHUN	177.675	100.674	78.467	78.578	117.03	116.84	100.575	103.743	77.989	114.194	2.123	2.227	1.944	1.969	1.954		177.675	117.03	1.01075
XEKNUW	118.519	80.937	115.624	99.527	179.163	80.904	118.519	98.226	80.904	99.527	1.979	1.97	2.183	2.209	1.97		179.163	118.519	1.01073
ALOPOI	101.366	101.851	77.746	118.066	113.123	77.772	178.709	103.886	115.425	77.384	2.279	2.067	2.061	2.064	2.2		178.709	118.066	1.01072
TOLBIF	119.359	94.615	85.385	119.359	94.615	180	85.385	119.359	94.615	85.385	2.289	2.289	2.289	1.883	2.164		180	119.359	1.01068
MIYXAU	98.655	98.733	80.753	116.836	118.165	80.655	178.806	100.904	117.101	80.291	2.515	2.115	2.116	2.129	2.249		178.806	118.165	1.01068
CEDBUJ22	94.613	119.36	94.613	180	85.387	119.36	119.36	85.387	94.613	85.387	1.783	2.187	2.65	1.783	1.783		180	119.36	1.01067
YASDOM	102.948	103.603	75.96	113.682	112.138	74.087	176.437	107.299	115.798	76.188	2.269	2.016	2.019	2.053	2.374		176.437	115.798	1.01065
VEQFIH	179.394	96.787	82.727	83.091	118.528	118.563	96.779	96.854	83.764	118.756	1.905	2.109	1.881	1.874	1.879		179.394	118.756	1.01063
GOGJAN16	85.402	180	119.364	119.364	94.598	94.598	85.402	85.402	94.598	119.364	2.636	1.785	1.785	2.29	1.785		180	119.364	1.0106
IBUTII	99.735	116.023	100.81	178.382	79.7	117.75	115.969	78.983	101.789	78.955	1.996	1.93	2.253	2.015	2.015		178.382	117.75	1.01053
GOGJAN01	85.43	180	119.372	119.372	94.57	94.57	85.43	85.43	94.57	119.372	2.639	1.785	1.785	2.295	1.785		180	119.372	1.01047
JOSQIR	85.469	180	119.383	119.383	94.531	94.531	85.469	85.469	94.531	119.383	2.04	1.96	1.96	2.379	1.96		180	119.383	1.01028
GIJBOR	102.553	113.681	102.593	178.506	77.387	117.889	115.537	78.619	101.248	77.628	1.826	1.831	2.301	1.837	1.841		178.506	117.889	1.01028
MEFHAI	72.734	112.515	176.428	71.751	111.184	103.727	104.39	115.811	79.491	108.146	2.13	2.2	2.132	2.102	2.04		176.428	115.811	1.01028
QOZCIS	179.36	74.313	105.334	101.497	115.639	118.751	74.505	77.99	106.28	107.41	2.417	2.091	2.034	2.136	2.149		179.36	118.751	1.01015
CENLOX	81.537	117.962	81.231	179.412	97.657	118.804	116.967	98.146	82.072	99.356	1.836	2.379	1.808	1.846	1.833		179.412	118.804	1.01013
LIHZOR	94.444	180	119.406	119.406	85.556	85.556	94.444	94.444	85.556	119.406	1.997	2.07	2.07	1.974	2.07		180	119.406	1.0099
QUHDAZ	70.06	114.398	177.395	73.573	111.929	95.503	111.753	116.809	85.274	103.842	2.055	2.836	2.08	2.776	2.781		177.395	116.809	1.00977
BIJHEI	178.677	102.949	77.725	77.992	113.085	118.095	100.953	102.725	77.707	115.793	1.823	2.263	1.836	1.831	1.841		178.677	118.095	1.0097
CEDBUJ07	94.383	119.422	94.383	180	85.617	119.422	119.422	85.617	94.383	85.617	1.719	2.159	2.687	1.719	1.719		180	119.422	1.00963
CEDBUJ01	94.378	119.423	94.378	180	85.622	119.423	119.423	85.622	94.378	85.622	1.784	2.186	2.649	1.784	1.784		180	119.423	1.00962
ILUTOZ	101.64	105.971	75.152	112.292	114.687	75.497	176.778	104.094	116.213	77.627	2.556	2.094	2.067	2.059	2.419		176.778	116.213	1.00942
ZAGHOH	177.904	100.632	79.142	79.685	115.388	117.34	102.749	98.575	79.164	117.224	1.979	2.293	1.933	1.937	1.933		177.904	117.34	1.0094
CEDBUJ20	94.321	180	119.438	119.438	85.679	85.679	94.321	94.321	85.679	119.438	2.188	1.78	1.78	2.65	1.78		180	119.438	1.00937
VIJGEA	85.683	85.683	94.317	119.439	119.439	94.317	180	85.683	119.439	94.317	2.477	1.79	1.79	1.79	1.82		180	119.439	1.00935
GOGJAN15	85.705	180	119.445	119.445	94.295	94.295	85.705	85.705	94.295	119.445	2.637	1.782	1.782	2.29	1.782		180	119.445	1.00925
QUMRIB	94.372	94.374	85.628	119.394	119.445	85.626	180	94.372	119.435	85.628	2.632	3.309	3.309	3.308	2.654		180	119.445	1.00925
XENHED	85.541	180	119.451	119.423	94.454	94.455	85.545	85.546	94.459	119.335	2.383	1.7	1.702	1.687	1.701		180	119.451	1.00915
CEDBUJ16	94.267	180	119.452	119.452	85.733	85.733	94.267	94.267	85.733	119.452	2.189	1.78	1.78	2.652	1.78		180	119.452	1.00913
CEDBUJ18	94.267	180	119.452	119.452	85.733	85.733	94.267	94.267	85.733	119.452	2.188	1.781	1.781	2.65	1.781		180	119.452	1.00913
VOFQIQ	103.542	114.868	175.598	104.297	113.362	78.508	72.057	115.051	103.839	77.885	1.998	1.759	1.874	1.883	2.301		175.598	115.051	1.00912
CEDBUJ19	94.262	180	119.454	119.454	85.738	85.738	94.262	94.262	85.738	119.454	2.188	1.781	1.781	2.65	1.781		180	119.454	1.0091
CEDBUJ17	94.25	180	119.457	119.457	85.75	85.75	94.25	94.25	85.75	119.457	2.188	1.781	1.781	2.651	1.781		180	119.457	1.00905
EQAZON	101.457	103.02	77.276	114.183	118.179	77.423	178.721	103.602	113.514	77.156	2.43	2.081	2.066	2.059	2.197		178.721	118.179	1.00903
RANHIY	99.396	118.004	98.991	178.955	80.957	118.415	116.555	81.608	98.286	80.779	1.98	2.206	2.157	1.968	1.966		178.955	118.415	1.009
KAGCIH	81.674	179.329	118.803	118.089	99.387	97.494	82.342	81.262	97.851	117.053	2.197	2.31	2.306	2.248	2.312		179.329	118.803	1.00877
CEDBUJ01	94.182	119.474	94.182	180	85.818	119.474	119.474	85.818	94.182	85.818	1.78	2.188	2.649	1.78	1.78		180	119.474	1.00877
ISOFAX	82.302	82.998	97.927	118.621	118.251	97.6	179.147	82.474	118.217	96.701	2.364	1.865	1.855	1.783	1.81		179.147	118.621	1.00877
QIYVEZ	104.817	109.13	73.489	117.216	105.176	73.033	177.742	106.59	113.568	73.178	2.381	2.169	2.157	2.161	2.498		177.742	117.216	1.00877
YUDRIZ	80.365	116.709	179.307	76.535	118.781	105.549	99.103	110.276	75.106	103.271	2.485	2	2.04	2.037	2.157		179.307	118.781	1.00877
ROMCIF	175.612	74.023	109.929	96.023	114.616	113.488	73.931	80.253	105.711	115.087	2.402	2.119	2.096	1.936	1.944		175.612	115.087	1.00875
YUZNIR	98.361	100.083	80.811	118.609	116.942	80.089	179.133	100.35	116.278	80.3	2.366	1.984	1.983	1.979	2.205		179.133	118.609	1.00873
ZUSVIS	85.61	119.429	179.951	85.648	119.424	94.378	94.346	119.432	85.664	94.354	2.351	1.932	2.351	2.351	1.868		179.951	119.432	1.00865
REPJAZ	180	94.141	85.859	85.859	119.484	119.484	94.141	94.141	85.859	119.484	2.197	2.683	1.786	1.786	1.786		180	119.484	1.0086
CEDBUJ14	94.128	180	119.487	119.487	85.872	85.872	94.128	94.128	85.872	119.487	2.189	1.778	1.778	2.662	1.778		180	119.487	1.00855
ICOZEF	75.898	81.798	102.474	114.636	116.244	101.444	176.757	75.898	116.244	102.474	2.497	1.764	1.764	1.761	1.792		176.757	116.244	1.00855
CEDBUJ	94.115	180	119.49	119.49	85.885	85.885	94.115	94.115	85.885	119.49	2.191	1.778	1.778	2.661	1.778		180	119.49	1.0085
CEDBUJ13	94.114	180	119.491	119.491	85.886	85.886	94.114	94.114	85.886	119.491	2.191	1.777	1.777	2.666	1.777		180	119.491	1.00848
CEDBUJ15	94.109	180	119.492	119.492	85.891	85.891	94.109	94.109	85.891	119.492	2.192	1.774	1.774	2.662	1.774		180	119.492	1.00847
RURPIF	81.5	81.459	98.58	119.086	116.669	98.157	179.594	82.145	118.103	98.154	2.791	2.146	2.135	2.139	1.981		179.594	119.086	1.00847
CEDBUJ22	94.091	119.496	94.091	180	85.909	119.496	119.496	85.909	94.091	85.909	1.782	2.187	2.65	1.782	1.782		180	119.496	1.0084
WEQLAF	102.569	112.546	104.114	173.494	73.395	112.755	111.125	73.07	112.99	73.598	2.088	2.324	2.548	2.073	2.08		173.494	112.99	1.0084
GOGJAN08	85.931	119.501	85.931	180	94.069	119.501	119.501	94.069	85.931	94.069	1.772	2.242	2.656	1.772	1.772		180	119.501	1.00832
VOMQUK	101.805	85.842	84.848	56.127	112.253	95.644	172.747	109.772	56.176	76.267	2.023	3.117	3.127	2.968	2.048		172.747	112.253	1.00823
QUMREX	94.117	94.117	85.883	119.501	119.509	85.883	180	94.119	119.458	85.881	2.409	3.229	3.227	3.229	2.419		180	119.509	1.00818
PPEACO10	104.328	105.031	74.594	113.009	118.435	75.37	178.919	104.49	110.052	76.099	2.224	2.356	2.374	2.378	2.676		178.919	118.435	1.00807
REPHUR	179.959	94.304	85.684	85.674	119.462	119.476	94.301	94.301	85.736	119.391	2.193	2.672	1.78	1.779	1.78		179.959	119.476	1.00805
ONUFOU	179.29	99.81	79.996	80.027	117.304	115.411	99.312	100.203	80.656	118.811	2.414	2.266	1.999	1.996	2.002		179.29	118.811	1.00798
MASFEC	86.022	180	119.523	119.523	93.978	93.978	86.022	86.022	93.978	119.523	2.406	1.728	1.728	2.296	1.728		180	119.523	1.00795
CEDBUJ25	85.788	119.488	179.962	85.73	119.409	94.247	94.249	119.474	85.74	94.246	1.784	2.65	1.785	1.785	2.189		179.962	119.488	1.0079
KUBWUB	98.999	98.756	80.702	118.673	116.215	80.698	179.144	100.025	117.493	80.816	2.364	2.108	2.112	2.116	2.237		179.144	118.673	1.00785
CEDBUJ23	93.95	119.53	93.95	180	86.05	119.53	119.53	86.05	93.95	86.05	1.781	2.188	2.65	1.781	1.781		180	119.53	1.00783
CEDBUJ24	93.95	119.53	93.95	180	86.05	119.53	119.53	86.05	93.95	86.05	1.784	2.188	2.651	1.784	1.784		180	119.53	1.00783
WEMCID	117.911	80.103	101.682	115.959	78.131	178.381	101.515	114.595	77.414	101.159	1.943	2.033	2.03	2.258	2.011		178.381	117.911	1.00783
CEDBUJ02	93.922	119.537	93.922	180	86.078	119.537	119.537	86.078	93.922	86.078	1.782	2.187	2.649	1.782	1.782		180	119.537	1.00772
LAZGAX	98.098	117.082	97.82	179.448	81.988	117.987	118.994	81.592	98.562	81.949	2.366	2.086	2.3	2.368	2.358		179.448	118.994	1.00757
LIXGIJ	93.867	93.867	86.133	119.55	119.55	86.133	180	93.867	119.55	86.133	2.292	2.029	2.029	2.029	1.927		180	119.55	1.0075
POVXOO	86.039	119.546	180	86.041	119.487	93.959	93.961	119.551	86.041	93.959	2.406	1.916	2.408	2.408	1.943		180	119.551	1.00748
GOGJAN14	93.849	180	119.554	119.554	86.151	86.151	93.849	93.849	86.151	119.554	2.29	1.78	1.78	2.638	1.78		180	119.554	1.00743
NIHPOK	178.53	79.639	101.904	100.352	118.085	116.698	79.161	80.018	98.951	115.675	2.305	2.282	2.344	2.349	2.363		178.53	118.085	1.00742
PODTAF	79.96	79.164	101.174	115.898	118.113	99.488	178.551	80.442	116.88	99.8	2.654	2.074	2.085	2.082	2.145		178.551	118.113	1.0073
GOGJAN13	93.793	180	119.567	119.567	86.207	86.207	93.793	93.793	86.207	119.567	2.29	1.781	1.781	2.64	1.781		180	119.567	1.00722
CEDBUJ03	93.776	119.571	93.776	180	86.224	119.571	119.571	86.224	93.776	86.224	1.786	2.186	2.651	1.786	1.786		180	119.571	1.00715
CEDBUJ04	93.772	119.571	93.772	180	86.228	119.571	119.571	86.228	93.772	86.228	1.788	2.187	2.653	1.788	1.788		180	119.571	1.00715
WECDAJ	93.954	93.951	86.046	119.572	119.512	86.049	180	93.954	119.505	86.046	2.415	2.084	2.083	2.085	2.06		180	119.572	1.00713
TEGVUY	93.932	180	119.576	119.552	86.072	86.071	93.929	93.928	86.068	119.477	2.264	2.03	2.032	1.926	2.032		180	119.576	1.00707
CAVJOZ	93.749	93.749	86.251	119.578	119.578	86.251	180	93.749	119.575	86.251	2.358	2.133	2.133	2.133	2.285		180	119.578	1.00703
HUTQES	98.494	116.844	99.639	179.19	80.6	116.742	118.768	80.701	99.711	80.86	2.045	1.913	2.21	2.032	2.028		179.19	118.768	1.00703
GEYPAB	82.145	179.59	119.17	118.211	95.569	96.591	83.817	84.262	97.613	118.719	2.288	1.768	1.805	1.818	1.809		179.59	119.17	1.007
MIQGOK	93.861	93.863	86.139	119.51	119.558	86.137	180	93.86	119.585	86.14	2.214	1.924	1.925	1.923	2.112		180	119.585	1.00692
PODTAF	79.714	79.805	99.219	118.411	114.655	100.323	178.826	80.209	117.915	100.766	2.647	2.088	2.08	2.067	2.143		178.826	118.411	1.00692
TAMKID	106.283	100.482	76.99	114.641	114.727	76.773	176.506	101.932	116.095	77.5	1.938	2.034	2.102	2.107	2.192		176.506	116.095	1.00685
HUPJIN	99.912	97.573	81.152	118.515	117.434	82.03	178.925	97.887	117.67	81.436	2.571	2.114	2.129	2.116	2.27		178.925	118.515	1.00683
GOGJAN12	93.679	180	119.592	119.592	86.321	86.321	93.679	93.679	86.321	119.592	2.29	1.778	1.778	2.641	1.778		180	119.592	1.0068
YICPOS	80.88	81.118	99.245	117.662	116	98.455	179.557	81.037	119.151	99.268	2.198	2.283	2.285	2.274	2.341		179.557	119.151	1.00677
ZAHXOY	176.715	104.356	73.301	74.734	107.945	116.31	108.892	106.268	72.381	112.335	2.369	2.479	2.164	2.138	2.124		176.715	116.31	1.00675
GOGJAN07	86.362	119.601	86.362	180	93.638	119.601	119.601	93.638	86.362	93.638	1.776	2.249	2.674	1.776	1.776		180	119.601	1.00665
YOXLII	96.892	118.576	97.632	179.033	83.188	118.635	118.596	83.07	95.993	83.223	1.963	2.111	2.156	1.958	1.964		179.033	118.635	1.00663
GOGJAN11	93.632	180	119.603	119.603	86.368	86.368	93.632	93.632	86.368	119.603	2.292	1.778	1.778	2.643	1.778		180	119.603	1.00662
HAHKUX	86.213	180	119.547	119.549	93.79	93.79	86.21	86.21	93.787	119.607	2.327	1.935	1.934	2.073	1.934		180	119.607	1.00655
GOGJAN09	93.587	180	119.612	119.612	86.413	86.413	93.587	93.587	86.413	119.612	2.293	1.776	1.776	2.649	1.776		180	119.612	1.00647
YUGWUT	93.849	179.97	119.535	119.592	86.166	86.123	93.847	93.849	86.166	119.535	1.799	1.812	1.812	2.7	1.813		179.97	119.592	1.0063
ASAQIV	179.655	82.634	96.92	97.087	118.143	119.281	83.004	83.243	97.116	118.135	2.285	2.175	2.393	2.394	2.386		179.655	119.281	1.00623
GOGJAN	93.485	180	119.634	119.634	86.515	86.515	93.485	93.485	86.515	119.634	2.293	1.78	1.78	2.649	1.78		180	119.634	1.0061
KEMLOD	86.526	86.526	93.474	119.636	119.636	93.474	180	86.526	119.636	93.474	2.669	1.776	1.776	1.776	1.811		180	119.636	1.00607
GOGJAN15	86.578	180	119.647	119.647	93.422	93.422	86.578	86.578	93.422	119.647	2.637	1.784	1.784	2.288	1.784		180	119.647	1.00588
LUXGAM	178.778	102.157	76.304	76.699	111.57	118.428	102.533	103.578	78.793	115.8	2.284	2.239	2.055	2.039	2.027		178.778	118.428	1.00583
HUPKEK	105.652	101.737	75.946	113.621	112.399	76.248	177.901	103.839	117.552	76.562	2.526	2.347	2.335	2.356	2.465		177.901	117.552	1.00582
DIVZOX	93.38	180	119.656	119.656	86.62	86.62	93.38	93.38	86.62	119.656	2.176	1.772	1.772	2.671	1.772		180	119.656	1.00573
VOFQIQ	103.969	114.185	175.516	103.663	115.173	78.442	71.547	114.082	103.836	78.556	2.011	1.77	1.876	1.876	2.313		175.516	115.173	1.00572
GOGJAN03	93.337	180	119.664	119.664	86.663	86.663	93.337	93.337	86.663	119.664	2.294	1.785	1.785	2.648	1.785		180	119.664	1.0056
EXEGEV	178.825	100.153	79.914	79.937	117.194	115.652	100.625	98.892	80.506	118.5	2.26	2.246	1.971	1.983	1.976		178.825	118.5	1.00542
MIQFUP	93.439	93.441	86.561	119.603	119.65	86.559	180	93.438	119.678	86.562	2.185	1.927	1.928	1.926	2.115		180	119.678	1.00537
NOQKOT	98.405	98.202	82.154	119.064	117.39	81.286	179.38	97.612	117.729	82.333	2.291	2.09	2.098	2.132	2.107		179.38	119.064	1.00527
HUBVEG	110.453	106.586	69.521	107.068	106.422	69.123	174.865	114.549	111.773	69.933	2.584	2.381	2.361	2.365	2.628		174.865	114.549	1.00527
GOGJAN02	93.227	93.227	86.773	119.686	119.686	86.773	180	93.227	119.686	86.773	2.291	1.79	1.79	1.79	2.643		180	119.686	1.00523
COSPHP	93.245	119.679	180	93.245	119.687	86.755	86.755	119.682	93.245	86.755	1.926	2.348	1.926	1.926	2.42		180	119.687	1.00522
GOGJAN16	86.806	180	119.692	119.692	93.194	93.194	86.806	86.806	93.194	119.692	2.636	1.782	1.782	2.287	1.782		180	119.692	1.00513
WECDAJ	93.325	93.325	86.675	119.695	119.681	86.675	180	93.327	119.624	86.673	2.415	2.045	2.044	2.045	2.069		180	119.695	1.00508
HECVIV	115.534	104.9	109.696	76.317	177.522	101.863	117.218	74.878	105.89	76.191	1.89	1.897	2.26	2.215	1.923		177.522	117.218	1.00507
CENKEO	178.083	102.292	77.857	78.281	113.325	117.785	100.352	103.218	78.075	116.401	1.99	2.328	1.901	1.901	1.918		178.083	117.785	1.00497
HITVOV	93.127	93.127	86.873	119.705	119.705	86.873	180	93.127	119.705	86.873	2.48	2.338	2.338	2.338	2.671		180	119.705	1.00492
TAVDIG	99.119	104.239	77.575	115.546	114.059	76.626	176.558	104.853	116.264	77.623	2.009	1.992	2.014	2.001	2.218		176.558	116.264	1.0049
GOGJAN01	86.895	180	119.709	119.709	93.105	93.105	86.895	86.895	93.105	119.709	2.639	1.785	1.785	2.292	1.785		180	119.709	1.00485
GOGJAN17	86.917	180	119.713	119.713	93.083	93.083	86.917	86.917	93.083	119.713	2.636	1.787	1.787	2.286	1.787		180	119.713	1.00478
DUMZEQ01	86.92	119.714	86.92	180	93.08	119.714	119.714	93.08	86.92	93.08	1.905	2.845	2.297	1.905	1.905		180	119.714	1.00477
XIBROR	176.602	73.063	110.953	106.178	107.694	116.319	72.315	73.006	104.269	110.778	2.698	1.852	2.246	2.25	2.26		176.602	116.319	1.00472
ABEVOU	174.112	72.418	111.981	108.461	113.837	112.267	72.652	72.612	102.092	108.118	2.547	1.788	2.164	2.155	2.173		174.112	113.837	1.00458
RUDDUR	74.589	73.897	113.521	109.905	100.178	113.41	75.007	173.794	112.467	106.28	2.369	2.032	1.964	2.042	2.032		173.794	113.521	1.00455
MANKEU	86.743	180	119.727	119.63	93.255	93.259	86.741	86.745	93.257	119.684	1.944	2.058	2.059	2.446	2.057		180	119.727	1.00455
GOGJAN18	86.996	180	119.728	119.728	93.004	93.004	86.996	86.996	93.004	119.728	2.636	1.787	1.787	2.285	1.787		180	119.728	1.00453
GOGJAN19	87.009	180	119.73	119.73	92.991	92.991	87.009	87.009	92.991	119.73	2.636	1.788	1.788	2.285	1.788		180	119.73	1.0045
TEPXIX	105.179	110.391	106.29	177.247	73.421	108.619	117.003	72.537	109.016	73.777	2.067	2.2	2.536	2.07	2.085		177.247	117.003	1.00407
UJUPAR	102.537	100.068	79.239	115.532	117.974	78.904	178.214	100.628	115.708	78.664	2.417	2.123	2.134	2.135	2.228		178.214	117.974	1.004
GOGJAN06	87.186	119.761	87.186	180	92.814	119.761	119.761	92.814	87.186	92.814	1.78	2.261	2.694	1.78	1.78		180	119.761	1.00398
JUVVEB	100.005	114.999	100.546	179.622	80.438	116.678	119.385	79.661	99.563	79.782	1.982	1.796	2.25	1.978	1.98		179.622	119.385	1.00395
YOLYIH	87.236	87.236	92.764	119.769	119.769	92.764	180	87.236	119.769	92.764	2.418	2.015	2.015	2.015	2.052		180	119.769	1.00385
BUBCIK	179.049	81.153	97.587	99.403	115.99	118.224	81.519	80.779	99.58	118.821	2.05	2.233	2.072	2.06	2.062		179.049	118.821	1.0038
HAHKOR	87.063	180	119.719	119.779	92.937	92.935	87.065	87.063	92.937	119.722	2.261	1.944	1.944	2.086	1.946		180	119.779	1.00368
CEQYOM	87.302	87.302	92.698	119.78	119.78	92.698	180	87.302	119.78	92.698	2.117	2.367	2.367	2.367	2.248		180	119.78	1.00367
WIWFEO	92.644	180	119.789	119.789	87.356	87.356	92.644	92.644	87.356	119.789	2.337	2.252	2.252	2.11	2.252		180	119.789	1.00352
EWECOZ	178.553	80.779	100.108	98.317	116.394	117.157	80.265	80.293	100.246	118.349	2.214	2.094	2.022	2.005	2.014		178.553	118.349	1.0034
IMEFOV	97.976	98.168	81.596	118.95	117.983	81.4	179.152	98.451	117.07	82.397	2.371	2.072	2.093	2.09	2.24		179.152	118.95	1.00337
CEDBUJ08	87.46	119.805	87.46	180	92.54	119.805	119.805	92.54	87.46	92.54	1.756	2.154	2.754	1.756	1.756		180	119.805	1.00325
KEMLOD01	87.47	180	119.807	119.807	92.53	92.53	87.47	87.47	92.53	119.807	2.67	1.772	1.772	1.822	1.772		180	119.807	1.00322
HIGWIF	68.755	69.989	114.559	107.906	110.868	111.922	174.737	69.872	106.616	104.948	2.457	2.322	2.306	2.312	2.573		174.737	114.559	1.00297
XANNOQ	101.23	111.972	176.53	103.022	116.361	77.163	76.374	115.874	106.16	76.051	2.053	1.965	2.059	2.013	2.285		176.53	116.361	1.00282
FOQVEM	87.644	87.644	92.356	119.832	119.832	92.356	180	87.644	119.832	92.356	2.157	2.107	2.107	2.107	2.281		180	119.832	1.0028
FOQVIQ	87.722	87.722	92.278	119.843	119.843	92.278	180	87.722	119.843	92.278	2.152	2.112	2.112	2.112	2.411		180	119.843	1.00262
CBUPCO01	119.845	87.732	92.268	119.845	87.732	180	92.268	119.845	87.732	92.268	1.754	1.754	1.754	2.665	2.178		180	119.845	1.00258
EQAZON02	103.11	103.646	113.185	77.518	76.999	114.203	101.283	178.648	118.499	77.366	2.431	2.061	2.193	2.066	2.079		178.648	118.499	1.00248
XEKPIM	101.514	117.547	99.426	178.033	79.802	117.887	114.696	79.807	100.769	78.668	1.974	1.913	2.243	1.978	1.968		178.033	117.887	1.00243
EXEFEU	177.827	103.96	78.695	79.086	116.085	117.701	99.803	100.234	78.166	114.875	2.626	2.277	1.982	1.964	1.975		177.827	117.701	1.0021
GOGJAN04	92.001	119.879	92.001	180	87.999	119.879	119.879	87.999	92.001	87.999	1.795	2.283	2.629	1.795	1.795		180	119.879	1.00202
FEVDUG	91.965	91.965	88.035	119.883	119.883	88.035	180	91.965	119.883	88.035	2.473	2.245	2.245	2.245	2.332		180	119.883	1.00195
TAVVEU	81.582	116.561	179.001	81.97	118.884	97.817	99.384	118.603	81.942	97.32	2.389	2.287	2.397	2.404	2.264		179.001	118.884	1.00195
YIJLAG	179.963	87.636	92.399	92.399	119.854	119.852	87.582	87.584	92.401	119.772	1.969	1.946	2.34	2.338	2.34		179.963	119.854	1.00182
DIPYIK	88.109	88.109	91.891	119.892	119.892	91.891	180	88.109	119.892	91.891	2.618	1.927	1.927	1.927	1.888		180	119.892	1.0018
UTOHAO	92.209	92.21	87.791	119.837	119.899	87.79	180	92.211	119.822	87.789	2.423	2.262	2.261	2.261	2.237		180	119.899	1.00168
NIPDAR	119.834	92.079	87.92	119.901	92.081	180	87.921	119.873	92.08	87.919	2.167	2.166	2.165	1.939	2.141		180	119.901	1.00165
AJOQAS	77.719	177.667	115.924	113.985	98.327	105.75	76.501	79.963	101.645	117.568	3.505	2.55	2.52	2.535	2.52		177.667	117.568	1.00165
JAMGAG	78.182	178.644	118.55	117.489	103.293	102.311	77.557	77.983	100.757	111.13	2.232	1.941	1.916	1.83	1.93		178.644	118.55	1.00157
BESCOS	83.387	83.063	97.366	118.602	118.181	96.61	179.244	83.35	119.151	96.219	2.089	2.144	2.148	2.16	2.039		179.244	119.151	1.00155
RIJQAF	78.835	115.834	81.286	178.471	100.081	116.635	118.381	100.198	79.352	100.23	1.969	2.528	1.959	1.94	1.987		178.471	118.381	1.0015
YIJLEK	179.964	87.79	92.244	92.244	119.876	119.873	87.737	87.738	92.246	119.794	2.005	1.968	2.359	2.357	2.359		179.964	119.876	1.00147
YIJMEL	179.964	87.822	92.213	92.213	119.88	119.878	87.769	87.77	92.214	119.798	2.009	1.959	2.348	2.347	2.348		179.964	119.88	1.0014
MSBFEC	91.619	180	119.921	119.921	88.381	88.381	91.619	91.619	88.381	119.921	1.816	1.657	1.657	2.49	1.657		180	119.921	1.00132
YUGLUH	178.658	79.99	101.215	98.243	117.322	118.581	80.106	81.332	99.114	116.039	1.996	1.935	2.124	2.108	2.091		178.658	118.581	1.00128
YIJLUA	179.964	87.883	92.151	92.151	119.888	119.886	87.83	87.831	92.153	119.807	2.014	1.965	2.35	2.348	2.35		179.964	119.888	1.00127
YIJMAH	179.964	87.898	92.136	92.136	119.89	119.888	87.845	87.847	92.138	119.808	2.004	1.958	2.349	2.347	2.349		179.964	119.89	1.00123
YIJMIP	179.962	87.909	92.127	92.127	119.891	119.889	87.854	87.855	92.129	119.809	1.925	1.931	2.34	2.338	2.34		179.962	119.891	1.00118
YIJLOU	179.963	87.906	92.128	92.129	119.893	119.887	87.851	87.855	92.13	119.81	1.977	1.977	2.362	2.36	2.362		179.963	119.893	1.00117
YIJLIO	179.964	87.951	92.083	92.083	119.897	119.894	87.898	87.899	92.085	119.815	2.01	1.958	2.358	2.356	2.358		179.964	119.897	1.00112
YIJMUB	179.964	87.974	92.061	92.061	119.9	119.897	87.92	87.922	92.062	119.818	2.011	1.964	2.343	2.342	2.344		179.964	119.9	1.00107
YIJMOV	179.964	87.982	92.053	92.053	119.901	119.898	87.928	87.93	92.054	119.819	2.003	1.967	2.358	2.356	2.358		179.964	119.901	1.00105
YIJNAI	179.964	87.991	92.044	92.044	119.903	119.898	87.937	87.94	92.045	119.82	2.005	1.959	2.349	2.347	2.349		179.964	119.903	1.00102
IBOCAE	102.455	102.214	78.857	116.523	114.514	79.033	177.384	99.808	117.329	77.576	2.347	2.139	2.184	2.158	2.116		177.384	117.329	1.00092
BIJHIM	77.993	115.853	78.026	178.508	101.42	118.463	112.906	101.32	77.774	103.466	1.823	2.28	1.818	1.818	1.875		178.508	118.463	1.00075
SELFOE	119.958	88.818	91.182	119.958	88.818	180	91.182	119.958	88.818	91.182	2.835	2.835	2.835	2.063	2.602		180	119.958	1.0007
RURPAX	81.134	80.732	98.067	118.774	117.877	100.416	178.816	80.813	115.976	98.851	2.825	2.134	2.145	2.139	1.978		178.816	118.774	1.0007
IBIQIW	102.652	79.773	98.236	98.949	80.067	80.286	117.099	117.518	177.556	116.603	2.278	2.028	2.274	2.3	2.269		177.556	117.518	1.00063
COHPPP	91.019	91.019	88.981	119.969	119.969	88.981	180	91.019	119.969	88.981	1.439	2.128	2.128	2.128	2.089		180	119.969	1.00052
IKOMIF	90.919	90.919	89.081	119.974	119.974	89.081	180	90.919	119.974	89.081	2.055	2.199	2.199	2.199	2.331		180	119.974	1.00043
VECWUY	178.176	74.504	104.226	107.94	109.212	118.153	73.971	73.137	106.329	110.375	2.252	1.857	2.224	2.215	2.219		178.176	118.153	1.00038
WEMDIE	117.098	80.945	103.12	114.965	78.034	177.33	100.528	117.312	78.038	99.3	1.931	2.026	2.015	2.249	2.018		177.33	117.312	1.0003
BOCDAA	91.322	91.321	88.678	119.944	119.916	88.679	180	91.321	119.982	88.679	2.262	2.04	2.041	2.04	2.114		180	119.982	1.0003
XIXRAZ	99.235	106.81	82.366	115.428	118.126	71.567	178.143	96.983	115.679	83.127	1.919	2.248	2.247	2.104	2.352		178.143	118.126	1.00028
IJIVUS	179.31	84.676	98.089	95.064	118.789	119.298	82.601	84.594	94.972	118.63	2.03	2.023	2.078	2.048	2.119		179.31	119.298	1.0002
FODXOL	119.991	90.549	89.451	119.991	90.549	180	89.451	119.991	90.549	89.451	2.204	2.204	2.204	2.195	2.183		180	119.991	1.00015
UJUPIZ	98.379	100.899	80.679	118.56	116.552	80.501	178.569	99.57	116.701	79.997	2.317	2.203	2.201	2.177	2.228		178.569	118.56	1.00015
GOGJAN05	90.515	119.992	90.515	180	89.485	119.992	119.992	89.485	90.515	89.485	1.791	2.277	2.65	1.791	1.791		180	119.992	1.00013
PPEHCO	88.83	180	119.93	119.994	91.171	91.17	88.83	88.829	91.17	119.953	2.091	2.124	2.123	1.379	2.124		180	119.994	1.0001
HUVLEQ	177.979	77.389	103.998	103.234	112.477	115.542	76.662	78	100.628	117.977	2.154	2.042	2.114	2.103	2.136		177.979	117.977	1.00003
BENLUB	90.233	90.233	89.767	119.998	119.998	89.767	180	90.233	119.998	89.767	2.551	2.572	2.572	2.572	2.554		180	119.998	1.00003
FASSEX	119.979	89.103	90.897	119.998	89.103	180	90.897	119.95	89.103	90.897	2.152	2.151	2.151	1.737	1.741		180	119.998	1.00003
RETDID	90.239	119.998	90.239	180	89.761	119.998	119.998	89.761	90.239	89.761	2.73	3.141	3.129	2.73	2.73		180	119.998	1.00003
SAMGIW	90.278	90.278	89.722	119.998	119.998	89.722	180	90.278	119.998	89.722	2.348	1.926	1.926	1.926	2.361		180	119.998	1.00003
KIZKEJ	119.999	89.786	90.214	119.999	89.786	180	90.214	119.999	89.786	90.214	2.28	2.28	2.28	2.682	2.701		180	119.999	1.00002
COSPHP	90	120	180	90	120	90	90	120	90	90	1.896	2.318	1.896	1.896	2.318		180	120	1
ESELIY	90	180	120	120	90	90	90	90	90	120	2.358	1.927	1.927	2.358	1.927		180	120	1
GATMAP	90	120	180	90	120	90	90	120	90	90	2.375	2.118	2.375	2.375	2.118		180	120	1
GATMAP01	120	90.029	89.971	120	90.029	180	89.971	120	90.029	89.971	2.379	2.379	2.379	2.127	2.107		180	120	1
GATMAP02	120	90	90	120	90	180	90	120	90	90	2.377	2.377	2.377	2.12	2.12		180	120	1
HEMCUX	90	180	120	120	90	90	90	90	90	120	2.547	2.2	2.2	2.547	2.2		180	120	1
JESPED	90	120	180	90	120	90	90	120	90	90	2.39	2.366	2.39	2.39	2.366		180	120	1
JESPIH	90	120	180	90	120	90	90	120	90	90	2.308	2.27	2.308	2.308	2.27		180	120	1
KUQDUW	90	120	90	180	90	120	120	90	90	90	1.835	2.176	2.176	1.835	1.835		180	120	1
MALMUI	90	180	120	120	90	90	90	90	90	120	2.429	2.539	2.539	2.429	2.539		180	120	1
SOBYUE	90	180	120	120	90	90	90	90	90	120	2.682	2.28	2.28	2.682	2.28		180	120	1
SOBZAL	90	180	120	120	90	90	90	90	90	120	2.841	2.342	2.342	2.841	2.342		180	120	1
SOBZEP	90	180	120	120	90	90	90	90	90	120	2.287	2.104	2.104	2.287	2.104		180	120	1
SOBZIT	90	180	120	120	90	90	90	90	90	120	2.467	2.029	2.029	2.467	2.029		180	120	1
KANLIV	90	180	119.999	119.999	90	90	90	90	90	120.002	2.285	2.347	2.347	2.285	2.347		180	120.002	0.999967
EVUJEL	90	180	120.01	119.98	90	90	90	90	90	120.01	2.312	2.118	2.118	2.312	2.117		180	120.01	0.999833
EVUJEL01	90	180	120.01	120.01	90	90	90	90	90	119.98	2.309	2.148	2.149	2.309	2.149		180	120.01	0.999833
AHIFOM	89.374	180	120.011	119.996	90.626	90.626	89.374	89.374	90.626	119.957	2.716	2.595	2.597	1.824	2.596		180	120.011	0.999817
RUFLUB	97.271	82.139	98.263	97.359	82.472	82.51	118.552	119.205	179.193	117.041	2.317	1.84	2.328	2.229	2.322		179.193	119.205	0.9998
RITWOH01	104.148	102.05	112.299	77.196	77.364	115.195	101.516	178.642	118.655	77.705	2.283	2.058	2.201	2.056	2.069		178.642	118.655	0.999783
UBUGOQ	90	120.009	180	90	120.017	90	90	119.974	90	90	2.918	2.468	2.918	2.917	2.468		180	120.017	0.999717
IBIZEZ	90	180	120.018	119.964	90	90	90	90	90	120.018	2.495	2.458	2.458	2.495	2.457		180	120.018	0.9997
REGLEU	84.705	119.078	179.06	81.564	117.405	98.37	94.36	118.908	82.184	98.825	2.269	2.227	1.81	1.811	1.793		179.06	119.078	0.9997
RITWOH02	101.465	104.245	115.202	77.644	77.188	118.559	102.059	178.541	112.349	77.373	2.286	2.069	2.204	2.061	2.056		178.541	118.559	0.9997
WIRFOS	90.472	90.473	89.528	119.953	120.019	89.527	180	90.472	120.007	89.528	2.637	1.936	1.936	1.935	2.647		180	120.019	0.999683
HEDSOY	90.424	90.424	89.576	120.002	120.021	89.576	180	90.424	119.96	89.576	1.786	2.138	2.136	2.137	1.903		180	120.021	0.99965
ILUTEP	175.938	74.466	107.902	103.188	109.436	115.967	76.082	74.039	104.023	114.922	2.411	1.991	2.111	2.103	2.062		175.938	115.967	0.999517
ESELIY	89.418	89.418	90.582	120.031	119.987	90.582	180	89.418	119.951	90.582	2.342	1.928	1.927	1.929	2.356		180	120.031	0.999483
IVOCIH	90	120.031	180	90	119.985	90	90	119.985	90	90	1.857	2.311	1.858	1.857	2.311		180	120.031	0.999483
LAXWUD	90	180	120.032	119.977	90	90	90	90	90	119.991	2.251	2.317	2.318	2.251	2.317		180	120.032	0.999467
LAXXAK	90	180	119.991	120.033	90	90	90	90	90	119.977	2.252	2.317	2.317	2.252	2.318		180	120.033	0.99945
JURPAN	178.77	80.269	100.587	98.636	115.047	117.534	80.028	80.135	100.334	118.807	2.891	2.345	2.242	2.251	2.245		178.77	118.807	0.999383
IFIXAW	112.633	78.42	104.944	117.075	77.707	177.038	103.971	115.992	75.482	99.582	2.035	2.017	2.012	2.406	1.978		177.038	117.075	0.999383
RIJQAF	81.214	117.057	79.117	177.255	99.292	117.294	116.339	101.479	78.895	100.025	1.978	2.518	1.935	1.934	1.983		177.255	117.294	0.99935
LELFEQ	99.978	177.247	115.964	110.834	75.604	76.52	104.389	106.048	77.323	117.288	2.277	2.067	2.048	2.259	2.061		177.247	117.288	0.999317
OZERAO	179.978	90	90	90.019	120	119.98	90	90	89.981	120.02	2.969	2.97	2.462	2.463	2.463		179.978	120.02	0.9993
OMIQUW	90	119.984	179.973	90	120.015	89.799	90	120	90.178	90.023	1.698	1.991	1.696	1.697	1.997		179.973	120.015	0.9993
GOFVOO	90	120.02	179.977	89.98	120	90	90	119.98	90.02	90	2.449	2.751	2.449	2.448	2.746		179.977	120.02	0.999283
OZERUI	179.976	90	89.98	90.02	120.02	119.98	90	90	90	120	2.703	2.708	2.374	2.374	2.375		179.976	120.02	0.999267
YEMXIA	89.979	120	179.976	90	120.02	90	90	119.98	90.021	90	2.376	2.691	2.376	2.376	2.686		179.976	120.02	0.999267
YEMXIA01	90.021	120.02	179.976	89.979	119.98	90	90	120	90	90	2.467	2.704	2.468	2.468	2.7		179.976	120.02	0.999267
VUCZAW	98.934	97.108	82.083	117.709	119.022	82.483	178.976	96.151	118.376	83.246	2.677	1.934	1.931	1.929	2.135		178.976	119.022	0.999233
EXEFIY	177.338	104.277	79.039	78.494	117.387	116.095	100.145	99.662	78.324	115.125	2.62	2.276	1.976	1.963	1.977		177.338	117.387	0.999183
KUQDUW	90	120.015	90	180	90	120.05	119.935	90	90	90	1.824	2.177	2.177	1.822	1.824		180	120.05	0.999167
IXAXAI	90	120.022	179.97	89.974	120	90	90	119.978	90.026	90	2.352	2.334	2.352	2.351	2.335		179.97	120.022	0.999133
GATMAP03	90.029	120	179.967	90	119.978	90	90	120.022	89.971	90	2.374	2.103	2.375	2.375	2.104		179.967	120.022	0.999083
ROFKOO	89.876	179.965	120.004	120.023	90.137	90.09	89.876	89.876	90.146	119.971	2.392	2.569	2.57	2.263	2.57		179.965	120.023	0.999033
VOCSOW	102.081	103.422	75.909	116.61	110.091	75.224	176.549	107.213	115.804	76.234	2.304	2.063	2.025	2.041	2.418		176.549	116.61	0.998983
XEQBIE	90	179.962	120.023	120.023	89.967	90	90	90	90.034	119.954	2.429	2.025	2.026	2.429	2.026		179.962	120.023	0.998983
NIHPUQ	179.138	80.974	100.649	99.107	117.823	115.127	80.181	80.648	98.435	119.201	2.29	1.78	2.308	2.296	2.317		179.138	119.201	0.99895
KUQDUW	90	120.065	90	180	90	119.986	119.949	90	90	90	1.82	2.181	2.181	1.819	1.821		180	120.065	0.998917
GAHDIE	57.44	57.44	114.278	68.748	114.278	68.748	92.593	92.593	114.88	174.815	2.908	2.634	2.125	2.634	2.125		174.815	114.88	0.998917
TOJLAH	81.536	82.286	98.272	118.987	118.269	98.745	178.919	79.652	115.758	99.542	1.981	2.294	2.258	2.127	1.818		178.919	118.987	0.998867
MEFHAI	72.05	103.598	78.955	72.088	105.418	107.947	112.926	112.978	173.01	113.084	2.146	2.197	2.145	2.02	2.085		173.01	113.084	0.998767
EZIQAF	178.401	97.972	79.802	80.821	118.477	117.708	100.776	100.213	80.45	115.573	2.338	2.192	1.989	1.983	2.002		178.401	118.477	0.998733
HUKTAI	179.065	94.934	83.894	83.956	118.654	119.148	95.706	96.976	84.535	119.098	2.062	2.14	1.876	1.87	1.869		179.065	119.148	0.998617
GIDQES01	119.885	88.656	119.578	93.252	179.798	86.647	119.885	91.546	86.647	93.252	2.485	2.546	2.055	1.999	2.546		179.798	119.885	0.99855
DIDYIZ	178.118	101.83	78.337	78.419	115.965	114.154	99.822	102.892	78.679	118.209	2.294	2.195	2.026	2.007	2.032		178.118	118.209	0.998483
ERASIB	90	179.952	119.956	120	90.041	90	90	90	89.959	120.044	2.189	1.767	1.766	2.191	1.766		179.952	120.044	0.998467
CAZNUM	82.938	80.026	97.596	116.075	119.066	98.942	178.968	82.938	119.066	97.596	2.517	1.741	1.741	1.722	1.782		178.968	119.066	0.998367
QAWVUF	176.873	74.787	100.026	101.859	116.99	116.708	78.804	81.255	103.343	114.161	2.536	1.73	1.785	1.765	1.731		176.873	116.99	0.99805
ACIMIK	106.179	116.604	103.964	176.487	77.612	115.079	113.344	76.781	99.23	76.248	2.027	1.974	2.292	2.033	2.028		176.487	116.604	0.99805
ALOPOI	100.544	103.475	77.769	114.842	118.39	76.97	178.271	103.106	113.295	78.041	2.282	2.07	2.067	2.064	2.231		178.271	118.39	0.998017
CAVPOF	105.746	108.533	110.94	70.82	172.557	112.681	105.746	64.024	112.681	70.82	1.852	1.853	1.656	1.864	1.853		172.557	112.681	0.997933
EFIJAG	101.674	177.75	112.527	117.876	76.631	76.396	104.262	104.929	76.113	113.475	2.515	2.36	2.355	2.457	2.338		177.75	117.876	0.9979
ISINEF	98.097	98.6	81.012	117.645	116.776	81.031	178.684	99.462	118.818	81.822	2.288	2.161	2.129	2.14	2.203		178.684	118.818	0.997767
APUDEW	72.256	177.463	107.55	108.852	104.989	110.612	71.921	73.347	106.755	117.597	2.604	2.258	2.247	1.86	2.252		177.463	117.597	0.997767
HIKNOF	176.379	105.033	76.688	76.869	113.988	116.515	105.133	99.511	76.619	114.165	2.309	2.246	2.11	2.095	2.107		176.379	116.515	0.997733
TPCOAU	79.573	176.633	115.542	115.289	101.074	101.176	75.999	78.809	103.424	116.785	2.509	1.76	1.76	1.746	1.776		176.633	116.785	0.997467
ICOZAB	76.07	82.143	101.979	115.069	116.255	101.756	176.101	76.07	116.255	101.979	2.464	1.759	1.759	1.76	1.786		176.101	116.255	0.997433
BAYJIW	178.422	98.994	80.032	80.109	118.6	115.353	101.529	99.3	80.064	117.311	2.282	2.06	2.316	2.32	2.354		178.422	118.6	0.997033
ACONOW	178.901	96.499	82.877	82.905	119.083	118.307	96.715	98.183	82.817	118.053	2.374	2.379	2.322	2.317	2.315		178.901	119.083	0.996967
UWEPAP	99.911	116.854	100.722	178.326	80.103	118.528	116.355	80.328	98.337	80.608	2.386	1.913	2.305	2.388	2.379		178.326	118.528	0.996633
ABEWAI	179.471	79.483	99.972	99.787	116.669	114.561	80.42	79.702	100.652	119.684	2.224	2.301	2.039	2.024	2.032		179.471	119.684	0.99645
XEPFEE	105.399	177.607	111.531	114.683	75.592	76.846	102.301	103.005	76.982	117.831	2.303	2.041	2.057	2.386	1.994		177.607	117.831	0.996267
QIHNUT	102.591	177.562	117.794	112.424	78.265	77.429	100.197	103.444	78.197	117.054	2.289	2.038	2.038	2.189	2.068		177.562	117.794	0.996133
NOFJUO	100.574	101.692	77.131	113.739	117.93	79.286	177.698	103.573	115.79	77.662	1.886	2.031	2.064	2.002	2.199		177.698	117.93	0.996133
UDOMEG	100.151	105.12	79.247	112.178	117.673	77.322	177.439	101.769	116.674	76.252	1.962	2.082	2.144	2.14	2.203		177.439	117.673	0.9961
BESCOS	83.43	82.678	97.311	117.429	119.162	96.482	179.085	83.664	119.326	96.45	2.103	2.14	2.157	2.157	1.976		179.085	119.326	0.995983
WEMDAW	116.66	80.899	104.353	113.57	78.532	178.523	99.05	118.768	76.946	100.24	1.955	2.038	2.028	2.274	1.991		178.523	118.768	0.995917
ZATXEZ	100.138	98.672	80.964	114.409	118.617	80.046	178.622	99.875	118.878	80.36	2.39	2.058	2.061	2.083	2.209		178.622	118.878	0.995733
LARGES	97.574	97.529	83.152	117.939	119.52	82.23	179.262	96.846	117.752	82.682	1.936	2.315	2.305	2.323	2.23		179.262	119.52	0.9957
GIDQES	119.897	91.643	119.549	86.597	179.634	93.22	119.897	88.723	93.22	86.597	2.483	2.543	2.004	2.057	2.543		179.634	119.897	0.995617
GEYRUZ	82.538	82.307	98.153	117.966	117.24	97.261	179.304	82.246	119.582	97.484	2.773	2.14	2.131	2.135	1.917		179.304	119.582	0.995367
PAJSEB	178.336	78.716	99.813	101.195	117.408	118.617	78.531	79.395	102.307	113.066	2.17	2.037	2.032	2.038	2.043		178.336	118.617	0.995317
SASKIG	179.697	96.633	82.088	83.106	119.986	116.915	97.615	96.988	83.564	118.613	2.273	2.002	2.307	2.311	2.321		179.697	119.986	0.995183
BOHPEV	81.324	82.309	99.73	118.956	116.68	96.457	178.665	80.611	117.791	99.535	2.696	2.157	2.158	2.14	1.945		178.665	118.956	0.99515
UJUPIZ	99.566	99.098	79.657	116.335	116.577	80.103	178.386	100.577	118.678	81.037	2.315	2.202	2.185	2.214	2.234		178.386	118.678	0.995133
HUKSUB	178.95	95.89	83.773	83.108	118.195	119.242	95.667	97.942	83.626	118.775	2.44	2.135	1.877	1.868	1.875		178.95	119.242	0.995133
HILKES	103.936	106.211	75.455	118.194	110.542	75.85	177.893	103.924	112.691	74.765	2.288	2.03	2.055	2.039	2.384		177.893	118.194	0.994983
IGUZUF	102.002	101.163	77.699	112.264	116.165	77.463	178.146	103.612	118.451	78.159	2.265	2.069	2.048	2.061	2.188		178.146	118.451	0.994917
QOMTIV	100.81	102.862	76.349	117.456	113.74	78.268	177.145	104.605	114.601	77.16	2.253	2.079	2.071	2.047	2.261		177.145	117.456	0.994817
SEZTOG	78.73	175.711	113.587	112.323	103.322	105.318	75.2	72.825	104.735	116.025	2.336	1.751	1.753	1.746	1.752		175.711	116.025	0.994767
RITWOH	101.646	104.14	77.487	114.067	118.994	77.15	178.673	102.377	112.744	77.151	2.282	2.062	2.047	2.064	2.199		178.673	118.994	0.99465
TEQQAH	179.665	81.645	98.491	98.536	116.358	119.987	81.247	81.774	98.318	117.292	1.991	1.749	2.001	2	1.995		179.665	119.987	0.994633
LEFYAW	95.643	179.628	119.951	117.224	84.548	83.96	95.668	95.643	84.548	119.951	1.829	2.159	2.159	2.023	2.166		179.628	119.951	0.994617
XIBROR	175.636	72.517	105.31	105.136	115.964	109.721	72.584	72.306	111.847	108.237	2.716	1.841	2.242	2.259	2.241		175.636	115.964	0.994533
ECASEI	179.455	83.254	97.075	96.604	117.71	118.139	82.502	83.323	97.254	119.791	2.213	2.095	2.103	2.085	2.108		179.455	119.791	0.9944
ALOPOI	102.117	104.102	77.741	118.644	116.874	77.487	178.303	101.059	111.025	77.601	2.272	2.074	2.077	2.059	2.199		178.303	118.644	0.994317
PUKTAQ	176.437	78.347	101.549	99.55	114.862	116.783	77.668	77.805	105.024	115.617	2.886	2.012	2.018	1.913	1.989		176.437	116.783	0.994233
ZATXUP	99.812	100.458	80.278	118.395	118.578	81.073	178.227	98.694	114.776	79.744	2.387	2.07	2.094	2.065	2.247		178.227	118.578	0.99415
FIVDOE	98.931	118.367	99.029	178.016	80.85	115.841	117.483	79.684	101.084	80.437	2.003	1.781	2.228	2.02	2.005		178.016	118.367	0.99415
BODHEJ	177.755	81.433	96.234	100.057	118.011	118.109	81.521	81.055	99.68	117.198	2.205	2.02	2.121	2.126	2.122		177.755	118.109	0.9941
KEVJEA	179.534	85.39	94.504	94.473	119.897	118.575	85.185	85.984	94.458	119.718	2.841	2.175	2.224	2.226	2.214		179.534	119.897	0.99395
JAYGEY	179.266	77.741	101.727	102.771	119.629	116.691	77.612	77.793	102.326	110.429	2.301	2.049	2.02	2.023	2.023		179.266	119.629	0.99395
YUZZAV	86.08	179.694	120.061	119.769	92.908	93.492	86.203	87.232	94.084	119.064	2.724	1.727	1.775	1.746	1.802		179.694	120.061	0.993883
XURXOZ	96.267	118.686	96.29	179.683	83.621	117.797	120.051	83.816	96.072	83.928	2.195	1.74	2.165	2.205	2.205		179.683	120.051	0.993867
BAPKEI	83.061	119.765	84.14	179.397	95.767	117.259	119.538	96.408	84.26	96.378	2.257	2.035	2.21	2.259	2.252		179.397	119.765	0.993867
EDICIF	175.479	75.687	108.618	101.892	115.858	113.399	75.768	75.035	103.079	112.574	2.372	1.953	2.267	2.234	2.206		175.479	115.858	0.993683
UTOYEI	98.881	119.084	99.474	178.704	81.253	116.942	117.262	81.004	97.704	81.705	2.381	1.842	2.325	2.4	2.389		178.704	119.084	0.993667
POTLAM	179.13	97.284	82.171	82.365	119.51	117.484	98.381	96.777	83.034	118.007	1.814	2.233	2.234	2.228	2.238		179.13	119.51	0.993667
FUYNAO01	81.889	82.666	96.882	119.055	118.305	98.398	178.661	82.518	117.418	97.653	2.509	1.804	1.802	1.807	1.802		178.661	119.055	0.993433
REDCOU	179.314	96.148	84.302	81.944	118.262	118.292	95.135	98.011	84.469	119.73	2.319	2.235	1.766	1.762	2.278		179.314	119.73	0.993067
FINGER	95.223	179.655	116.099	117.973	80.442	80.673	99.653	99.287	84.726	120.084	1.755	2.081	1.991	2.287	2.002		179.655	120.084	0.99285
NAFLOX	174.353	71.867	105.105	105.492	105.467	114.785	72.356	71.406	113.714	112.03	2.437	1.995	2.1	2.082	2.149		174.353	114.785	0.9928
TAMKID	106.611	102.235	76.253	117.249	112.949	77.514	176.813	100.111	114.998	77.168	1.944	2.046	2.119	2.104	2.195		176.813	117.249	0.992733
JIWVIV	103.611	105.688	76.617	113.78	116.983	77.216	176.543	100.907	113.612	75.954	1.877	1.998	2.009	2.013	2.271		176.543	116.983	0.992667
ASAQUH	97.593	96.489	82.122	117.599	117.862	82.683	178.83	98.969	119.271	82.16	2.528	2.416	2.421	2.409	2.276		178.83	119.271	0.99265
ZIFDUN	178.914	81.036	97.28	100.51	119.101	119.37	82.028	80.549	98.61	114.632	2.024	1.931	2.095	2.047	2.073		178.914	119.37	0.9924
AMEROA	81.876	119.047	81.287	178.589	98.857	117.589	117.501	97.706	82.513	97.745	1.859	2.353	1.775	1.817	1.857		178.589	119.047	0.992367
JIPFIY	179.408	96.838	84.051	83.762	118.315	119.867	95.406	96.299	83.644	118.386	1.863	2.069	1.887	1.888	1.886		179.408	119.867	0.99235
ZUXTOB	179.245	96.45	83.901	83.93	117.575	119.71	95.357	96.566	83.81	119.35	2.354	2.37	1.903	1.911	1.91		179.245	119.71	0.99225
OWEMOU	86.251	83.673	117.581	93.628	96.56	120.244	86.251	179.766	120.244	93.628	2.335	1.905	2.137	1.925	1.905		179.766	120.244	0.992033
OMUHAH	95.873	120.131	179.648	96.899	117.978	82.681	83.904	117.916	97.202	83.447	1.964	1.68	1.964	1.971	2.02		179.648	120.131	0.99195
SIYTOK	102.637	111.431	105.638	173.236	73.063	113.72	109.232	72.529	113.455	72.224	2.121	1.852	2.479	2.112	2.113		173.236	113.72	0.991933
JELHEQ	80.645	82.831	98.02	117.193	118.472	98.417	178.514	83.346	118.999	96.728	2.064	2.042	2.059	2.048	1.743		178.514	118.999	0.991917
CAPSAP	177.406	108.106	74.075	72.908	117.891	106.067	104.103	106.43	74.294	113.309	2.279	2.436	2.055	2.033	2.053		177.406	117.891	0.991917
BEGLAD	178.841	81.723	97.411	97.541	117.774	119.327	82.656	81.413	99.23	117.09	2.212	2.015	2.098	2.087	2.13		178.841	119.327	0.9919
RUKZOM	178.154	79.124	102.564	99.618	113.012	117.475	78.915	78.656	101.05	118.645	2.177	2.047	2.053	2.037	2.041		178.154	118.645	0.991817
LIHZAD	176.237	74.056	104.528	107.565	114.73	116.728	74.897	76.045	103.153	109.054	2.423	1.983	2.071	2.111	2.097		176.237	116.728	0.991817
IFIXOK	118.449	78.62	102.189	108.682	75.865	177.957	101.512	117.836	76.031	105.769	1.993	1.982	2.051	2.376	1.949		177.957	118.449	0.9918
CENKEO	176.045	104.701	77.294	77.722	114.345	116.231	99.158	102.577	78.604	116.538	1.977	2.338	1.911	1.902	1.917		176.045	116.538	0.991783
BTECOP	98.933	98.614	81.411	116.689	119.907	80.797	179.406	99.408	116.219	80.848	2.399	2.355	2.384	2.378	2.311		179.406	119.907	0.99165
UTIZEE	174.428	75.871	108.831	104.388	113.515	114.929	75.952	75.591	99.233	114.132	2.875	2.399	2.521	2.518	2.519		174.428	114.929	0.99165
GOHQEB	179.579	81.278	99.12	98.846	120.09	115.673	81.256	81.133	98.379	117.373	2.071	1.966	2.027	2.051	2.042		179.579	120.09	0.991483
YUSBOF	178.372	98.606	79.567	79.972	118.889	116.372	101.903	99.931	80.063	115.659	2.666	2.222	1.957	1.947	1.949		178.372	118.889	0.991383
WATVET	179.264	82.804	97.74	96.81	119.784	116.591	81.535	83.667	97.428	118.827	2.715	1.784	1.789	1.801	1.799		179.264	119.784	0.991333
ADUDAF	174.56	113.577	62.982	69.19	102.094	108.426	111.97	115.084	67.64	104.85	2.278	2.334	1.947	1.928	1.885		174.56	115.084	0.991267
EPUSUF	91.795	91.693	105.513	101.547	92.078	87.806	103.761	51.906	164.987	51.939	3.062	2.34	3.249	2.326	3.028		164.987	105.513	0.991233
UNOTIB	83.39	179.013	119.148	119.543	94.756	97.057	83.919	84.641	96.243	118.053	1.897	2.212	2.227	2.202	2.208		179.013	119.543	0.991167
IBINOZ	177.343	99.773	80.846	81.002	117.267	117.705	100.732	96.357	81.269	117.887	2.256	2.312	2.262	2.296	2.28		177.343	117.887	0.990933
VUHJEN	91	179.506	119.671	120.051	87.741	88.752	91	92.753	88.752	120.051	2.234	1.783	1.768	1.771	1.783		179.506	120.051	0.990917
ZUBZEB	101.277	105.372	77.583	115.356	117.89	77.29	177.335	101.069	112.92	77.393	2.606	2.088	2.093	2.089	2.232		177.335	117.89	0.99075
ADEBUI	111.745	74.666	101.569	110.767	73.882	175.299	107.944	115.856	73.752	107.855	2.008	2.048	2.06	2.496	2.014		175.299	115.856	0.990717
PEMREF	178.928	99.2	80.391	80.077	115.999	116.087	100.681	99.341	80.288	119.487	1.921	2.439	1.94	1.992	1.956		178.928	119.487	0.990683
ESUDIH	177.257	80.539	97.274	99.29	117.747	117.818	80.545	80.298	102.001	116.364	2.224	2.12	2.033	2.058	2.063		177.257	117.818	0.99065
TAKWAF	81.816	119.3	82.862	178.736	97.229	116.194	119.279	97.335	82.408	98.378	1.847	2.33	1.776	1.852	1.841		178.736	119.3	0.9906
TUXVOZ	178.124	77.322	102.584	97.477	116.194	115.763	78.322	83.453	100.802	118.689	2.616	2.206	1.776	1.761	1.713		178.124	118.689	0.990583
PEGDAG	174.891	74.249	109.284	102.319	113.036	115.458	75.279	73.551	105.154	110.542	2.438	1.999	2.108	2.131	2.094		174.891	115.458	0.99055
WAVVIZ	94.748	119.952	94.759	179.382	86.018	118.621	119.484	84.652	94.415	85.414	2.225	2.298	2.198	2.224	2.229		179.382	119.952	0.9905
XIPMUE	93.901	119.583	95.011	179.136	85.224	118.787	119.712	85.288	94.925	85.656	2.274	2.09	2.229	2.302	2.285		179.136	119.712	0.9904
NAFKIQ	177.897	75.89	103.923	103.428	118.481	113.221	74.767	75.646	106.187	109.972	2.28	2.107	2.079	2.097	2.096		177.897	118.481	0.990267
QOZCOY	175.317	74.975	102.15	99.644	112.352	115.136	75.26	78.285	109.706	115.908	2.384	2.078	2.018	2.136	2.126		175.317	115.908	0.99015
GERSUR	178.876	82.413	96.23	98.521	118.814	119.469	82.681	82.239	97.911	116.61	2.939	1.777	1.777	1.782	1.797		178.876	119.469	0.990117
ZUJGIW	81.51	81.434	97.216	116.681	118.471	98.395	178.402	82.777	118.995	98.679	2.657	2.088	2.064	2.08	2.184		178.402	118.995	0.990117
XETBIJ	87.764	119.279	88.065	179.649	91.702	120.247	120.146	91.885	88.46	92.122	2.135	2.247	2.243	2.134	2.131		179.649	120.247	0.990033
WUVNAD	178.624	100.608	80.897	80.47	116.332	116.774	98.461	98.832	80.767	119.23	1.913	2.298	2.378	2.392	2.404		178.624	119.23	0.9899
ROCNOM	177.322	73.107	106.552	105.528	105.406	117.934	72.746	72.56	109.363	111.422	2.519	2.364	2.166	2.149	2.136		177.322	117.934	0.9898
EWEPUR	97.751	96.11	82.964	118.671	117.307	82.536	178.646	98.021	119.258	82.608	2.12	2.293	2.302	2.311	2.368		178.646	119.258	0.9898
GEYSEK	81.039	81.544	98.933	117.821	119.266	99.657	178.649	81.138	116.081	97.707	2.716	2.13	2.138	2.144	1.953		178.649	119.266	0.989717
TEDCUB	178.954	96.522	83.38	83.29	118.812	119.572	97.464	95.759	83.575	117.726	1.968	2.07	2.089	2.08	2.104		178.954	119.572	0.9897
QEQHUP	99.454	119.802	98.927	179.195	84.467	114.516	119.815	81.021	95.84	80.269	1.928	2.283	2.619	1.944	1.917		179.195	119.815	0.989667
MIGJIX	113.477	81.463	104.831	118.515	77.339	177.891	98.935	116.38	76.835	100.661	2.003	2.055	2.074	2.309	2.051		177.891	118.515	0.9896
NELBAK	76.736	118.82	77.079	178.193	105.556	115.693	109.787	103.129	75.997	101.329	2.403	2.388	2.051	2.452	2.45		178.193	118.82	0.98955
BXNPYW	80.369	115.709	80.991	176.971	99.343	117.598	117.275	100.684	77.661	100.931	1.875	2.323	1.732	1.888	1.898		176.971	117.598	0.98955
LARGIW	82.689	82.386	98.287	117.68	119.518	97.613	178.878	82.288	117.707	96.753	2.258	2.301	2.32	2.291	1.786		178.878	119.518	0.989333
PEGJUG	82.272	82.837	118.179	99.025	95.962	118.423	84.422	178.561	119.219	95.481	2.638	1.771	1.794	1.767	1.783		178.561	119.219	0.989033
PEGJUG10	82.272	82.837	118.179	99.025	95.962	118.423	84.422	178.561	119.219	95.481	2.638	1.771	1.794	1.767	1.783		178.561	119.219	0.989033
GEYSEK	81.324	81.414	97.567	116.538	117.893	97.95	178.21	81.235	118.868	100.531	2.712	2.127	2.144	2.135	1.954		178.21	118.868	0.989033
AXAHOW	94.004	95.58	84.746	119.407	119.149	85.15	178.744	95.986	119.017	84.533	2.219	2.192	2.164	2.183	2.028		178.744	119.407	0.98895
GABYEO	174.872	74.767	101.312	104.652	110.607	115.541	74.897	74.192	110.186	113.542	2.526	2.019	2.046	2.023	2.01		174.872	115.541	0.98885
XEMZUK	90.231	90.316	119.927	89.452	90.316	120.036	89.452	179.367	120.036	90.231	2.438	2.242	2.438	2.244	2.242		179.367	120.036	0.98885
OLEDOA	99.797	97.85	80.437	119.65	120.052	81.52	179.369	98.892	113.316	81.479	2.378	2.059	2.037	2.06	2.054		179.369	120.052	0.988617
VIBGUK	98.265	99.008	81.437	114.69	120.182	80.797	179.498	98.754	118.407	81.74	1.782	1.815	1.84	1.893	2.239		179.498	120.182	0.9886
LAYMUU	81.631	118.571	81.531	179.105	98.905	115.225	119.793	98.938	81.395	97.582	1.992	2.159	2.104	1.992	1.991		179.105	119.793	0.988533
BOXTUF	100.743	102.225	77.08	117.746	110.115	77.653	177.338	105.262	118.027	77.205	2.095	2.149	2.127	2.165	2.347		177.338	118.027	0.988517
RIKXOA	112.635	175.953	116.648	103.563	69.609	68.98	112.635	106.344	68.98	103.563	2.937	2.305	2.365	2.556	2.305		175.953	116.648	0.988417
UTOLOG	177.95	96.808	78.879	81.122	118.645	114.98	103.076	98.374	81.738	118.503	1.847	1.417	1.776	1.834	1.779		177.95	118.645	0.988417
WAGRAZ	90.236	90.236	90.606	89.159	90.606	89.159	119.888	119.888	179.529	120.225	1.78	2.196	1.776	2.196	1.776		179.529	120.225	0.9884
VILQUE	89.399	90.635	120.633	90.635	89.399	120.633	89.967	179.933	118.735	89.967	2.185	2.216	2.185	2.216	2.204		179.933	120.633	0.988333
CARLEN	177.706	79.164	97.566	104.022	114.469	118.407	80.146	76.968	102.168	116.041	2.447	1.793	1.772	1.786	1.772		177.706	118.407	0.988317
PUXWEK	98.944	100.276	80.009	117.404	114.834	79.336	178.468	100.302	119.195	81.191	2.261	2.165	2.121	2.186	1.985		178.468	119.195	0.987883
LELFIU	76.353	76.366	102.921	117.671	110.42	106.573	176.93	74.962	114.649	102.948	2.317	2.076	2.074	2.051	2.273		176.93	117.671	0.98765
YIWKUL01	178.809	99.25	79.699	80.823	119.553	119.151	100.117	98.203	81.847	113.778	2.38	2.052	2.065	2.07	2.054		178.809	119.553	0.9876
IXUCOV	100.84	176.921	111.613	117.398	77.296	77.425	105.605	100.606	78.328	117.674	2.629	2.067	2.08	2.187	2.066		176.921	117.674	0.98745
SETYAR	88.872	88.872	91.017	119.612	119.612	91.017	179.776	87.306	120.53	92.918	2.347	1.772	1.771	1.772	1.77		179.776	120.53	0.987433
TAMKOJ	111.218	100.583	74.573	112.536	114.55	74.998	173.989	101.662	114.746	76.929	2.003	2.128	2.204	2.234	2.329		173.989	114.746	0.987383
QOZCEO	176.224	78.293	100.899	99.305	116.016	114.641	76.88	79.196	105.457	116.981	2.255	2.025	1.945	2.029	2.042		176.224	116.981	0.987383
TAGGAL	94.647	179.43	118.893	118.643	84.732	85.024	94.593	95.827	85.174	120.189	2.171	2.138	2.14	2.124	2.14		179.43	120.189	0.98735
QUNKAL	179.672	85.115	96.072	95.659	120.444	118.859	84.219	84.332	94.61	118.031	2.232	1.781	1.75	1.747	1.751		179.672	120.444	0.987133
BODHEJ	99.427	117.584	178.282	98.774	119.064	82.014	81.976	117.345	96.432	81.397	2.109	1.997	2.113	2.114	2.194		178.282	119.064	0.986967
LATJIZ	179.366	90.427	90.378	89.985	119.887	120.152	89.607	89.473	90.128	119.959	2.392	1.772	1.781	1.781	1.797		179.366	120.152	0.9869
PACJIN	179.145	96.769	82.768	84.973	119.932	118.923	96.411	95.63	83.44	117.611	2.258	2.008	2.126	2.146	2.142		179.145	119.932	0.986883
IXUCOV01	100.91	176.927	117.073	111.951	77.608	77.372	100.616	105.433	78.136	117.717	2.635	2.073	2.068	2.194	2.07		176.927	117.717	0.986833
LELFAM	99.646	105.711	77.404	114.497	117.826	75.861	177.035	104.888	111.831	76.292	2.282	2.061	2.064	2.05	2.264		177.035	117.826	0.986817
ASUJAZ	79.552	76.404	101.411	114.498	114.861	101.193	177.565	78.617	118.379	102.897	1.363	2.082	2.09	2.086	2.119		177.565	118.379	0.986433
JELHOA	177.593	77.344	100.205	98.356	116.62	115.648	82.053	79.768	102.291	118.409	2.162	1.741	2.007	2.049	1.905		177.593	118.409	0.9864
ZATXOJ	97.92	96.925	82.951	119.503	119.661	83.342	178.844	96.508	116.304	82.391	2.296	2.095	2.113	2.091	2.061		178.844	119.661	0.986383
XITKOA	92.903	87.381	120.263	87.381	92.903	120.263	89.719	179.439	119.473	89.719	2.196	1.766	2.196	1.766	1.781		179.439	120.263	0.986267
TGLCDI	105.525	103.676	78.277	115.795	108.574	75.404	175.968	104.999	116.803	71.819	2.807	2.575	2.548	2.538	3.798		175.968	116.803	0.986083
OLEDOA	98.464	100.867	81.05	118.697	116.237	81.173	177.859	97.163	118.13	81.295	2.366	2.062	2.06	2.07	2.035		177.859	118.697	0.986033
ZUBZAX	102.274	101.255	77.694	119.679	112.194	77.74	178.838	103.905	114.429	77.066	2.272	2.072	2.077	2.086	2.228		178.838	119.679	0.985983
HINKAR	102.67	114.108	178.489	97.202	119.338	81.787	78.752	118.915	98.027	81.613	2.01	2.017	2.179	2.139	2.261		178.489	119.338	0.98585
RAWPOX	65.215	177.511	100.276	104.669	118.368	113.438	65.215	64.121	113.438	104.669	2.431	2.842	2.588	1.897	2.842		177.511	118.368	0.985717
ALOPOI	100.966	102.009	77.738	117.506	110.957	77.132	177.725	103.555	118.585	78.718	2.282	2.068	2.044	2.077	2.212		177.725	118.585	0.985667
HUBVIK	82.601	83.737	97.166	118.31	117.815	97.267	178.941	83.454	119.803	95.763	2.732	2.101	2.1	2.107	2.423		178.941	119.803	0.985633
ZAGSUV	179.401	82.269	97.305	96.634	120.277	117.317	83.283	82.981	97.545	117.815	2.62	1.832	1.768	1.748	1.76		179.401	120.277	0.9854
XIPMIS	100.532	117.118	97.397	177.417	80.793	116.649	118.293	80.81	100.449	80.02	2.347	1.801	2.439	2.331	2.351		177.417	118.293	0.9854
XUDJOV	90.234	89.877	118.736	89.892	89.877	120.632	89.892	179.754	120.632	90.234	2.132	1.763	2.132	1.853	1.763		179.754	120.632	0.985367
ZUBZEB	100.936	104.244	76.498	112.958	118.216	76.368	177.336	103.817	113.992	77.997	2.626	2.121	2.057	2.091	2.255		177.336	118.216	0.985333
OBOCUE	100.615	105.697	76.299	114.666	113.133	77.347	176.506	102.805	117.388	77.268	2.296	2.092	2.065	2.015	2.323		176.506	117.388	0.9853
BAHXOX10	179.914	91.868	88.064	88.171	120.815	119.672	91.983	91.869	88.047	119.184	2.428	2.129	2.14	2.11	2.126		179.914	120.815	0.984983
SOMFIJ	178.915	85.038	95.826	95.31	118.361	118.905	84.106	83.794	95.936	119.821	2.338	1.815	1.789	1.795	1.79		178.915	119.821	0.9849
KEBQAJ	120.846	120.846	89.669	90.365	89.669	90.365	89.967	89.967	118.307	179.934	2.336	1.877	1.898	1.877	1.898		179.934	120.846	0.9848
PEJBEL	90.183	90.183	89.583	119.744	119.744	89.583	179.53	91.851	120.463	88.619	2.37	1.801	1.789	1.801	1.772		179.53	120.463	0.98445
KADZIA	100.176	100.176	78.317	116.981	116.981	78.317	176.916	98.461	117.851	84.623	2.335	2.014	2.053	2.014	2.312		176.916	117.851	0.984417
ALAHUR	83.102	84.562	95.357	119.121	117.818	96.325	178.455	83.162	119.391	97.513	2.687	1.798	1.797	1.798	1.766		178.455	119.391	0.9844
ERASOH	89.83	89.922	120.783	90.247	89.922	119.608	90.247	179.844	119.608	89.83	2.202	1.762	2.202	1.764	1.762		179.844	120.783	0.98435
MURPOG	88.595	89.231	91.42	120.132	120.393	90.286	179.453	89.526	119.404	90.939	2.123	1.795	1.793	1.801	1.804		179.453	120.393	0.984333
BABGIX	176.404	80.36	103.37	98.986	116.809	117.344	80.076	80.145	97.014	117.329	2.257	2.102	2.061	2.081	2.067		176.404	117.344	0.984333
ORUVUT	92.717	93.256	86.828	119.908	118.886	86.476	179.263	93.975	120.213	86.754	1.978	2.009	2.018	2.024	1.941		179.263	120.213	0.984167
LIHYEI	99.636	117.929	178.494	102.792	113.226	80.181	80.493	119.447	98.462	78.394	2.035	2.083	2.042	2.025	2.243		178.494	119.447	0.984117
RASQAF	104.975	176.872	114.388	117.828	76.091	77.363	99.516	105.496	76.352	112.132	2.282	2.061	2.047	2.266	2.06		176.872	117.828	0.984067
FONTAD	91.846	120.59	179.632	87.966	120.59	90.184	87.966	118.82	90.184	91.846	1.85	1.887	1.85	1.798	1.887		179.632	120.59	0.984033
EZIRIO	115.368	104.799	69.06	102.944	111.677	72.536	175.57	105.102	116.529	73.087	2.356	2.039	2.036	2.031	2.604		175.57	116.529	0.984017
NUDVOZ	99.785	97.901	116.517	80.808	80.598	119.454	99.679	178.491	116.641	81.246	1.872	2.091	2.01	2.073	2.207		178.491	119.454	0.98395
WEMCEZ	116.416	80.692	102.832	112.805	78.207	178.842	98.17	119.816	77.547	102.595	1.964	2.035	2.034	2.279	2.021		178.842	119.816	0.983767
IWULER	85.974	83.069	93.745	119.135	119.696	95.982	178.71	87.139	119.252	94.094	1.885	1.979	1.941	1.918	1.868		178.71	119.696	0.983567
HEWGUL	178.137	78.743	103.074	102.266	117.058	110.61	78.546	76.063	101.431	119.124	2.2	1.992	1.904	1.895	1.886		178.137	119.124	0.98355
BAHXOX	179.885	91.831	88.068	88.225	120.872	119.642	91.973	91.848	88.055	119.164	2.429	2.128	2.14	2.11	2.127		179.885	120.872	0.98355
ONUFOU	177.916	101.463	79.847	80.401	118.91	116.794	98.127	100.125	79.964	115.565	2.41	2.265	1.996	2.004	2.003		177.916	118.91	0.983433
VUNPAW	179.787	85.905	94.147	93.44	120.782	118.401	85.819	86.759	93.927	119.487	2.229	1.786	1.789	1.757	1.779		179.787	120.782	0.983417
OJIFIY	179.02	98.524	82.62	82.269	118.855	120.017	96.403	98.115	82.054	115.841	2.38	2.103	2.106	2.087	2.096		179.02	120.017	0.983383
LIXGEF	94.221	93.48	86.321	120.196	120.441	86.387	179.44	93.708	118.056	85.893	2.273	2.021	2.031	2.029	1.944		179.44	120.441	0.983317
WAXJEK	176.986	80.411	101.157	99.198	117.987	114.305	80.411	77.788	101.157	117.987	2.566	1.773	1.724	1.759	1.759		176.986	117.987	0.983317
AZUDAA	116.94	81.129	118.871	95.236	177.849	78.181	116.535	98.915	82.855	103.661	2.109	1.775	1.758	1.453	2.108		177.849	118.871	0.982967
DIBKII	104.21	100.658	76.199	112.531	117.991	76.506	176.961	105.237	113.965	77.23	1.902	2.002	2.036	2.04	2.322		176.961	117.991	0.982833
BETPEW	175.628	101.02	74.55	75.438	116.661	112.016	109.113	104.855	75.141	112.066	2.238	2.393	2.007	2.008	2.019		175.628	116.661	0.982783
AQUFIC	97.697	100.965	81.235	119	119.252	80.791	178.218	97.957	114.751	81.373	2.244	2.071	2.052	2.069	2.026		178.218	119.252	0.982767
HEWGUL	177.569	79.328	103.243	101.802	116.99	111.203	78.266	75.774	101.765	118.611	2.216	1.984	1.909	1.911	1.904		177.569	118.611	0.982633
TULPAT	102.003	108.355	75.007	116.088	110.817	76.569	175.044	104.045	114.309	74.202	2.111	2.199	2.169	2.174	2.305		175.044	116.088	0.9826
LEWWUF	96.041	119.307	94.578	178.698	85.168	119.745	118.871	85.156	93.789	85.277	2.231	1.905	2.231	2.238	2.235		178.698	119.745	0.98255
LEWWUF10	96.041	119.307	94.578	178.698	85.168	119.745	118.871	85.156	93.789	85.277	2.231	1.905	2.231	2.238	2.235		178.698	119.745	0.98255
HIKNOF	178.611	103.924	76.491	77.132	119.659	110.23	103.498	101.673	77.34	115.322	2.309	2.25	2.122	2.09	2.121		178.611	119.659	0.982533
HAVJOE	178.258	102.745	79.574	79.648	115.221	119.308	99.914	99.13	78.929	115.51	2.179	2.276	1.983	1.983	1.98		178.258	119.308	0.9825
NAYXEQ	176.643	77.996	100.887	100.497	113.004	116.283	78.143	77.279	105.259	117.693	2.193	1.747	2.031	2.051	2.037		176.643	117.693	0.9825
PIDMAR	93.756	118.98	94.255	178.538	85.651	119.516	119.589	85.524	95.811	85.007	2.228	1.951	2.201	2.239	2.232		178.538	119.589	0.982483
BIXPIH	97.076	98.866	81.899	118.917	115.43	80.757	178.514	98.874	119.567	82.574	1.919	2.066	2.045	2.044	1.993		178.514	119.567	0.98245
BTECOP	96.19	98.731	82.518	117.276	117.388	82.157	178.685	98.829	119.745	81.578	2.395	2.391	2.388	2.379	2.233		178.685	119.745	0.982333
PEVPAI	97.523	97.664	82.844	118.193	116.353	82.403	179.518	96.901	120.592	82.646	1.786	1.848	1.835	1.847	2.351		179.518	120.592	0.9821
CPOMCT	80.069	82.778	100.409	118.147	120.476	97.314	179.4	83.99	116.081	95.458	2.613	1.788	1.689	1.761	1.808		179.4	120.476	0.982067
HAVSEF	101.068	100.564	79.374	115.838	113.552	78.815	179.368	100.518	120.444	79.66	2.07	2.085	2.091	2.101	2.235		179.368	120.444	0.982067
IFASAM	97.918	179.296	114.53	119.04	81.614	82.064	97.652	99.082	81.63	120.375	1.947	2.084	2.051	2.024	2.054		179.296	120.375	0.982017
OZOBUB	104.057	101.035	74.924	111.727	116.512	75.493	175.426	109.58	112.581	74.817	2.122	2.082	2.088	2.087	2.485		175.426	116.512	0.9819
TIBJEV	178.599	79.853	101.409	97.89	119.693	116.327	79.594	80.776	100.501	115.257	2.253	2.078	2.058	2.078	2.074		178.599	119.693	0.981767
PAVWUH	91.79	179.285	120.392	119.868	87.169	88.002	92.705	92.578	87.758	119.237	2.514	1.894	1.897	2.02	1.885		179.285	120.392	0.98155
ADOYAU	86.154	88.317	94.338	120.297	118.434	90.925	179.232	85.926	120.34	94.329	2.607	2.157	2.156	2.149	2.431		179.232	120.34	0.981533
VUDKEK	179.325	99.226	80.199	81.256	114.514	120.434	100.021	99.19	80.12	117.053	2.279	2.238	1.891	1.876	1.884		179.325	120.434	0.981517
PIYHOU	177.944	97.195	80.795	80.427	117.361	119.063	99.925	100.917	80.787	115.848	2.367	2.183	1.964	1.957	1.962		177.944	119.063	0.98135
ESORIP	100.358	99.784	80.288	120.284	119.027	80.438	179.155	98.978	112.339	80.212	2.088	2.075	2.095	2.058	2.178		179.155	120.284	0.981183
HUTRAP	99.145	117.207	98.163	178.482	80.767	119.611	116.322	82.265	99.029	80.671	1.978	2.236	2.148	1.919	1.945		178.482	119.611	0.981183
DIBKII	101.982	101.325	77.722	119.883	112.017	77.767	178.753	102.714	115.408	78.452	2.031	2.049	2.042	2.019	2.276		178.753	119.883	0.981167
XUHCUA	89.932	90.425	120.292	89.646	90.425	119.854	89.646	179.151	119.854	89.932	2.212	2.101	2.212	2.1	2.101		179.151	120.292	0.980983
SIQMEN	100.358	104.741	77.796	116.842	118.339	77.968	177.198	100.727	112.305	78.398	1.791	2.038	2.018	2.024	2.329		177.198	118.339	0.980983
WEMDEA	119.929	80.474	102.04	111.529	77.398	178.786	98.477	117.233	78.028	103.664	1.978	2.043	2.064	2.302	2.033		178.786	119.929	0.98095
UKAGUK	89.688	90.462	90.53	120.873	119.771	89.291	179.729	90.03	119.356	89.996	2.171	1.871	1.853	1.866	1.946		179.729	120.873	0.980933
RAWQAI	89.345	90.359	90.55	120.035	119.105	89.454	179.7	91.279	120.851	89.017	2.238	1.871	1.879	1.868	2.227		179.7	120.851	0.980817
ILIYAD	82.295	116.674	82.221	179.682	97.635	120.835	117.071	97.623	82.134	98.087	1.862	2.304	1.773	1.85	1.844		179.682	120.835	0.980783
GABYIS	105.203	108.967	104.439	179.522	74.112	120.675	110.68	75.256	105.574	75.473	2.037	2.02	2.436	2.052	2.063		179.522	120.675	0.980783
DAHXIW	176.925	100.237	81.375	79.858	118.079	117.524	95.793	102.555	80.125	116.305	2.514	2.555	2.02	2.024	2.013		176.925	118.079	0.980767
GEZQIO	86.121	94.953	86.612	74.87	103.767	93.758	115.498	119.731	178.577	119.601	1.897	2.245	2.071	1.941	1.932		178.577	119.731	0.980767
SIHFAT	175.708	77.995	105.779	100.92	114.088	116.703	78.289	78.116	98.736	116.862	2.221	2.005	2.064	2.086	2.072		175.708	116.862	0.980767
ORUWAA	179.719	85.961	93.856	94.552	118.186	119.323	86.134	85.213	94.288	120.875	1.958	1.936	2.036	2.014	2.018		179.719	120.875	0.980733
WIDHOJ	179.21	93.364	86.771	86.358	119.703	120.371	93.251	94.32	85.946	118.727	2.275	1.937	2.034	2.04	2.044		179.21	120.371	0.98065
ZOTLUR01	83.307	81.379	119.862	96.127	99.487	113.933	80.827	179.126	120.29	98.903	1.583	1.76	1.758	1.755	1.747		179.126	120.29	0.9806
ODODAM	91.574	91.351	87.509	119.724	120.079	88.601	178.911	90.978	120.043	89.987	2.268	2.285	2.272	2.27	2.259		178.911	120.079	0.980533
WAKJEZ	101.994	104.253	75.307	108.973	115.57	75.553	176.619	106.596	117.79	76.368	2.284	2.055	2.031	2.06	2.369		176.619	117.79	0.980483
VOCXEQ	179.358	96.032	84.208	84.285	117.899	120.533	95.156	96.106	84.226	118.582	2.269	2.043	1.877	1.869	1.886		179.358	120.533	0.980417
MEMMOG	96.507	119.321	178.143	97.851	117.696	82.171	81.821	118.018	98	83.677	2.013	2.007	2.071	2.048	2.032		178.143	119.321	0.980367
YIBTIO	95.011	95.095	84.36	120.447	118.578	84.884	179.267	95.419	118.561	85.229	2.235	2.151	2.137	2.16	2.034		179.267	120.447	0.980333
SAVJOR	178.799	81.016	101.116	99.39	111.43	119.985	79.53	79.409	99.478	119.648	2.219	1.795	2.047	1.959	1.94		178.799	119.985	0.980233
SBPCOB	88.997	88.203	90.743	119.114	120.923	91.88	179.734	88.923	119.812	91.251	2.593	1.779	1.751	1.709	2.212		179.734	120.923	0.980183
PADFUX	79.002	77.706	102.842	117.499	114.468	98.596	176.301	80.304	117.376	101.477	2.402	1.769	1.759	1.755	1.761		176.301	117.499	0.980033
XUDJIP	89.218	89.811	118.342	90.976	89.811	120.829	90.976	179.622	120.829	89.218	2.125	1.767	2.125	1.836	1.767		179.622	120.829	0.979883
LEWXAM	84.995	119.91	85.48	178.7	94.924	118.744	119.285	93.833	85.186	95.594	2.228	2.191	2.325	2.227	2.225		178.7	119.91	0.979833
LEWXAM10	84.995	119.91	85.48	178.7	94.924	118.744	119.285	93.833	85.186	95.594	2.228	2.191	2.325	2.227	2.225		178.7	119.91	0.979833
RUGZID	81.7	81.587	99.653	117.049	119.638	98.446	178.427	82.017	117.268	96.625	2.578	2.453	2.448	2.457	2.618		178.427	119.638	0.979817
CPEACO	102.227	101.253	77.603	117.299	110.969	75.513	176.086	105.492	117.012	77.897	2.248	2.439	2.415	2.037	2.423		176.086	117.299	0.979783
CENLUD	97.183	179.51	115.478	120.724	82.659	82.765	97.101	97.005	83.299	119.283	2.308	1.811	1.817	2.216	1.809		179.51	120.724	0.979767
CEBCAN	179.339	88.894	90.811	92.629	120.496	120.559	88.722	88.006	90.941	118.753	2.247	1.771	1.791	1.788	1.794		179.339	120.559	0.979667
ONAYIN	98.946	98.737	81.879	113.089	120.385	80.965	179.16	99.899	119.008	79.607	1.928	2.341	2.352	2.318	2.139		179.16	120.385	0.979583
LIXGUV	93.978	93.376	86.587	118.769	120.035	85.432	178.808	93.992	119.904	86.649	2.425	2.008	2.019	2.025	1.952		178.808	120.035	0.97955
SINWUI	102.832	101.985	77.64	115.887	110.291	78.112	179.344	101.957	120.574	77.411	2.274	2.064	2.083	2.062	2.264		179.344	120.574	0.9795
DEMWAT	96.505	99.111	82.584	117.463	117.875	82.458	178.427	96.79	119.662	82.529	2.507	1.984	2.089	2.116	2.176		178.427	119.662	0.979417
RARHIC	88.942	120.514	89.196	179.48	90.688	118.722	120.716	90.562	89.698	90.924	1.872	2.107	2.121	1.864	1.88		179.48	120.716	0.9794
XUBBUR	82.939	83.749	96.938	120.306	116.034	97.112	179.066	81.785	119.041	97.495	2.667	1.798	1.786	1.749	1.813		179.066	120.306	0.979333
OZOBUB	101.911	99.978	76.497	115.911	115.148	76.227	174.667	108.439	113.072	76.721	2.131	2.117	2.109	2.117	2.407		174.667	115.911	0.979267
YAQCID	60.24	59.888	119.754	97.645	97.731	119.493	179.294	60.068	96.416	120.542	2.601	2.435	2.443	2.446	2.338		179.294	120.542	0.9792
XUBBIF	83.022	83.135	96.196	120.442	116.621	97.45	179.186	82.18	118.264	98.041	2.595	1.792	1.791	1.79	1.808		179.186	120.442	0.979067
IBINOZ	177.412	100.272	80.519	80.93	117.157	118.67	97.031	100.976	80.285	116.288	2.249	2.298	2.293	2.285	2.264		177.412	118.67	0.979033
QAMDIR	179.029	93.095	84.882	83.724	120.29	119.49	96.085	95.729	86.499	118.003	2.218	2.702	1.765	1.799	1.799		179.029	120.29	0.978983
EJIMOB	97.52	179.735	120.999	117.477	82.245	82.762	97.403	97.494	82.566	116.525	1.943	2.075	2.082	2.01	2.059		179.735	120.999	0.978933
AXAHOW	95.852	94.641	84.62	120.793	120.484	85.192	179.525	95.739	116.078	83.968	2.239	2.184	2.188	2.185	2.021		179.525	120.793	0.978867
YEYYEI	94.339	94.07	84.602	119.481	118.781	85.206	178.204	96.769	119.431	85.017	1.934	1.961	1.927	1.95	1.954		178.204	119.481	0.978717
UKEHOI	178.863	94.301	87.367	84.673	118.417	120.142	93.735	95.015	84.897	119.736	2.187	2.419	2.019	2.032	1.992		178.863	120.142	0.978683
PEVHEG	178.955	81.695	98.359	97.206	120.238	116.246	82.626	82.004	98.147	117.943	2.171	2.207	2.376	2.398	2.371		178.955	120.238	0.978617
CICJII	120.816	120.816	97.791	81.965	97.791	81.965	90.236	90.236	118.368	179.529	2.7	2.086	1.979	2.086	1.979		179.529	120.816	0.97855
EXUWOJ	85.793	93.417	84.84	84.247	97.065	94.646	119.741	119.976	178.68	117.997	2.387	1.899	2.412	1.966	2.391		178.68	119.976	0.9784
HENXON	93.216	93.513	87.476	120.145	120.482	86.536	179.182	92.378	118.541	86.896	2.42	2.204	2.208	2.187	2.341		179.182	120.482	0.978333
LOBXIL	84.665	95.028	85.854	85.603	95.253	93.581	118.341	120.436	179.129	119.292	2.412	1.892	2.392	1.961	2.377		179.129	120.436	0.978217
OFUNAH	81.615	80.856	99.503	116.818	116.283	97.653	178.46	80.656	119.768	99.718	2.049	2.055	2.092	2.097	2.38		178.46	119.768	0.9782
WASQIR	101.526	98.518	81.013	117.807	118.677	80.886	177.368	97.924	115.819	80.186	2.039	2.067	2.068	2.056	2.271		177.368	118.677	0.978183
AZITAF	120.486	94.265	117.165	85.683	179.16	96.406	119.876	85.035	95.075	83.555	2.419	2.396	1.92	1.974	2.426		179.16	120.486	0.9779
IXIKIK	97.615	101.363	81.097	118.981	115.133	80.986	177.65	98.387	118.514	80.599	2.303	2.286	2.286	2.299	2.068		177.65	118.981	0.977817
HUPKAG	101.936	100.692	75.752	116.409	111.871	76.687	175.077	108.659	115.241	76.246	2.703	2.385	2.324	2.33	2.44		175.077	116.409	0.9778
ESORIP	178.557	100.695	81.58	80.317	119.529	113.042	98.545	98.402	80.55	119.897	2.093	2.188	2.077	2.066	2.052		178.557	119.897	0.977667
SIQLAF	177.996	80.364	98.866	100.498	115.013	117.94	80.242	81.496	98.542	119.357	2.705	1.789	1.765	1.761	1.763		177.996	119.357	0.977317
FOCXEA	86.981	86.421	119.738	93.997	93.47	119.368	88.828	178.923	120.284	90.293	2.261	1.759	1.801	1.758	1.75		178.923	120.284	0.977317
RASQAF	105.121	175.817	117.179	110.884	76.098	76.473	99.366	106.425	76.723	115.927	2.274	2.044	2.065	2.273	2.064		175.817	117.179	0.9773
JEKMOE	84.028	177.2	118.241	118.568	97.905	96.986	80.236	83.178	97.663	118.135	2.064	1.86	1.866	1.802	1.868		177.2	118.568	0.9772
VECJAO	82.203	82.325	98.714	120.356	116.095	96.843	178.986	82.133	118.136	97.741	2.152	1.873	1.88	1.884	1.682		178.986	120.356	0.977167
FOWHOP	82.179	96.649	80.945	82.852	98.075	99.32	120.123	116.513	178.753	117.619	2.457	2.685	2.46	2.568	2.463		178.753	120.123	0.977167
SAHLIW	179.162	81.761	97.579	98.544	120.535	116.452	82.465	80.701	98.955	116.761	2.551	1.727	1.724	1.765	1.75		179.162	120.535	0.977117
YIWLAS	104.284	105.43	74.861	120.511	112.406	74.798	179.137	105.251	107.611	75.367	2.509	2.075	2.071	2.102	2.44		179.137	120.511	0.9771
KICDIK	90.42	120.291	89.632	178.912	90.481	120.107	119.602	90.311	89.846	89.307	2.553	2.54	2.543	2.552	2.568		178.912	120.291	0.977017
GIHWOK01	96.956	178.179	118.664	119.558	81.232	81.503	97.779	100.583	81.966	115.441	2.234	2.055	2.055	2.043	2.065		178.179	119.558	0.977017
AXINOM	179.03	81.987	96.438	94.454	120.41	116.377	84.025	84.576	98.55	119.462	2.351	2.293	2.354	2.367	2.376		179.03	120.41	0.977
SUJFIM	96.404	98.746	82.46	118.816	120.171	82.163	178.784	97.521	115.894	82.68	2.234	2.367	2.37	2.381	2.214		178.784	120.171	0.976883
JEWMEG	118.147	108.838	103.886	75.223	73.756	109.337	99.339	78.525	115.578	176.759	2.04	2.131	2.41	2.133	2.065		176.759	118.147	0.976867
GICGUW	178.058	81.384	101.205	99.544	119.45	113.815	80.483	80.37	97.012	119.104	2.228	2.109	1.967	1.988	1.992		178.058	119.45	0.9768
PIHVUX	92.757	118.732	94.135	178.409	84.76	119.802	119.812	85.654	95.947	86.735	2.143	1.905	2.011	2.138	2.134		178.409	119.812	0.976617
PIHVUX10	92.757	118.732	94.135	178.409	84.76	119.802	119.812	85.654	95.947	86.735	2.143	1.905	2.011	2.138	2.134		178.409	119.812	0.976617
SAMGES	101.95	79.966	91.82	79.966	101.95	91.82	58.883	117.767	176.361	58.883	2.957	2.007	2.957	2.007	3.227		176.361	117.767	0.976567
HEWGUL01	102.073	103.474	78.978	116.746	118.695	78.342	177.285	101.3	111.36	76.013	1.98	1.901	1.926	1.903	2.216		177.285	118.695	0.9765
VAKRII	179.253	85.351	95.023	95.369	120.663	116.546	85.098	83.938	95.249	120.338	2.568	1.733	1.787	1.771	1.747		179.253	120.663	0.9765
DOGHEO	98.91	179.287	120.699	113.964	81.375	82.442	98.009	97.919	81.309	119.213	2.283	2.102	2.133	2.117	2.055		179.287	120.699	0.976467
LARGAO	98.527	95.844	82.76	117.315	120.044	83.105	178.627	97.182	118.033	82.613	1.905	2.31	2.334	2.306	2.245		178.627	120.044	0.976383
CAJDUO	84.481	85.196	96.391	118.918	120.321	94.963	178.904	84.159	118.145	94.831	2.533	2.15	2.159	2.148	2.071		178.904	120.321	0.976383
ZATWOI	99.165	98.659	81.287	120.75	117.678	81.577	179.331	98.419	114.753	80.92	2.367	2.16	2.173	2.177	2.114		179.331	120.75	0.97635
KOWNAL	179.048	86.264	93.306	95.02	117.876	120.062	85.745	85.41	94.279	120.472	2.407	1.994	2.253	2.25	2.257		179.048	120.472	0.976267
KOWNAL10	179.048	86.264	93.306	95.02	117.876	120.062	85.745	85.41	94.279	120.472	2.407	1.994	2.253	2.25	2.257		179.048	120.472	0.976267
ODUKEF	91.372	91.997	88.391	120.548	120.29	88.855	179.124	90.473	119.014	88.921	2.423	2.032	2.022	2.028	2.271		179.124	120.548	0.976267
IFASIU	97.451	116.655	178.568	98.765	116.893	81.849	81.283	119.993	99.345	81.345	2.066	1.94	2.029	2.084	2.033		178.568	119.993	0.97625
EHIFIK	98.945	97.638	81.497	115.491	118.099	81.107	178.716	98.583	120.143	82.283	1.935	2.058	2.07	2.053	2.013		178.716	120.143	0.976217
TOXSEE	96.866	118.19	94.747	178.846	84.381	120.277	118.221	83.161	96.611	84.233	2.103	1.997	2.022	2.079	2.114		178.846	120.277	0.97615
JUWPEY	93.76	93.904	86.69	119.042	120.868	86.173	179.436	92.965	118.956	86.517	2.471	1.919	1.911	1.925	2.067		179.436	120.868	0.976133
ALOPIC	101.063	100.574	77.88	111.915	119.337	78.405	177.893	102.958	117.059	79.142	2.318	2.069	2.068	2.081	2.176		177.893	119.337	0.975933
CUTPEM10	83.69	85.811	96.48	118.832	118.841	95.964	177.838	83.059	119.289	94.988	2.491	2.321	2.314	2.328	1.745		177.838	119.289	0.975817
ULOWOH	103.163	112.106	101.495	175.211	76.142	113.572	116.682	76.286	108.313	74.768	2.029	2.014	2.422	1.992	2.013		175.211	116.682	0.975483
BEHTIU	81.45	81.375	97.969	120.801	116.187	99.211	179.32	80.639	116.035	99.384	2.337	2.388	2.387	2.362	2.421		179.32	120.801	0.975317
SIZWEE	89.947	120.79	87.803	179.412	87.326	120.894	118.316	90.636	92.311	91.986	1.801	1.823	1.806	1.806	1.783		179.412	120.894	0.9753
PEXGIL	97.14	119.291	178.305	95.177	118.162	84.727	84.544	119.789	94.261	84.122	2.261	2.066	2.27	2.255	2.219		178.305	119.789	0.975267
DESZIK	115.17	82.247	121.084	98.151	179.599	82.414	118.438	97.676	82.235	97.285	1.891	1.899	1.697	2.183	1.899		179.599	121.084	0.97525
BEGSUE	80.653	118.544	81.084	179.649	98.525	113.264	121.141	98.997	81.634	99.13	1.826	2.188	1.694	1.834	1.833		179.649	121.141	0.975133
NOQKOT	98.4	98.998	81.856	117.54	120.289	81.924	178.786	96.756	116.391	82.084	2.28	2.125	2.089	2.115	2.093		178.786	120.289	0.97495
YIKTOB	89.724	88.796	90.817	118.858	120.723	91.417	179.218	88.769	120.344	90.476	2.647	1.779	1.782	1.799	1.76		179.218	120.723	0.974917
UTIZII	173.18	75.623	97.918	109.712	114.579	113.668	76.113	76.138	104.283	114.687	2.868	2.375	2.507	2.514	2.515		173.18	114.687	0.974883
GOYGAC	93.497	93.865	86.026	119.978	117.804	86.771	179.342	94.32	120.85	85.531	2.274	2.016	2.019	2.014	1.95		179.342	120.85	0.974867
QULSUM	120.704	85.152	95.361	119.393	84.4	179.188	95.011	117.587	85.232	94.823	3.249	3.269	3.296	2.257	2.317		179.188	120.704	0.974733
IQIVUZ	174.955	77.548	106.955	98.443	116.472	115.712	77.104	77.001	102.897	113.567	2.252	1.819	1.985	1.976	1.969		174.955	116.472	0.974717
SOQJIS	98.874	119.727	96.068	178.21	82.157	117.477	117.554	82.566	97.989	82.302	2.052	1.927	2.019	2.05	2.076		178.21	119.727	0.974717
COSFEV	89.504	91.262	90	120.949	118.923	89.23	179.43	91.003	120.097	89.011	2.387	1.75	1.779	1.738	1.716		179.43	120.949	0.974683
GERSUR	178.834	82.959	97.28	96.356	118.997	120.358	81.622	84.501	97.293	116.274	2.912	1.79	1.774	1.789	1.806		178.834	120.358	0.9746
MOJKAY	100.509	95.402	81.884	117.292	118.123	81.387	176.664	99.51	118.191	81.317	2.066	2.066	2.07	2.077	2.242		176.664	118.191	0.97455
ZUXTOB	179.027	94.566	84.183	84.968	119.583	120.557	95.939	95.826	84.547	117.199	2.351	2.36	1.897	1.905	1.91		179.027	120.557	0.9745
GERSUR	178.641	83.489	97.432	95.332	120.172	117.139	82.741	83.413	97.611	118.564	2.897	1.788	1.782	1.78	1.799		178.641	120.172	0.974483
SAYZIE	99.915	103.929	77.376	117.478	114.265	79.862	176.117	99.078	117.649	79.915	2.557	2.329	2.297	2.334	2.356		176.117	117.649	0.974467
TEGVUY	94.165	179.889	121.422	118.652	86.354	86.25	93.685	93.598	85.947	118.608	2.273	2.022	2.018	1.936	2.025		179.889	121.422	0.97445
TUFPEP	98.96	115.998	98.546	179.056	81.433	116.206	120.589	80.605	99.511	80.99	2.001	1.995	2.184	1.987	1.994		179.056	120.589	0.97445
TUFPEP01	98.96	115.998	98.546	179.056	81.433	116.206	120.589	80.605	99.511	80.99	2.001	1.995	2.184	1.987	1.994		179.056	120.589	0.97445
ODURUA	179.359	79.809	100.487	99.063	113.437	116.979	79.004	81.544	100.11	120.897	2.25	2.011	1.959	2.049	2.059		179.359	120.897	0.974367
SICLEW	106.062	102.276	79.366	114.731	115.905	73.818	174.366	102.849	113.035	75.747	1.847	2.064	2.074	2.088	2.176		174.366	115.905	0.97435
FUTWAT	98.653	178.71	120.254	114.675	82.219	82.476	97.936	96.523	82.161	119.747	2.237	2.394	2.356	2.218	2.369		178.71	120.254	0.974267
YEXZEI	175.142	100.196	75.463	76.362	116.689	113.124	108.095	104.808	75.187	112.431	2.381	2.463	2.314	2.35	2.353		175.142	116.689	0.974217
XIHSOW	177.93	75.686	102.799	105.637	119.479	115.652	76.205	76.422	103.275	108.001	2.355	2.019	2.005	2.061	2.031		177.93	119.479	0.974183
DOGGIQ	172.066	113.391	73.885	74.154	113.475	113.617	98.946	105.9	73.228	110.364	2.822	2.516	2.039	2.076	2.065		172.066	113.617	0.97415
ONAYOT	100.476	100.02	78.807	113.413	120.827	80.45	179.271	99.93	116.65	80.271	2.008	2.342	2.339	2.33	2.146		179.271	120.827	0.974067
ODURUA	81.504	80.077	120.93	99.006	100.032	116.942	79.12	179.369	113.636	100.288	2.247	1.962	2.013	2.046	2.044		179.369	120.93	0.973983
MALWIF	96.365	118.701	96.893	178.48	84.104	120.041	118.147	84.603	94.399	83.655	2.285	1.8	2.256	2.286	2.311		178.48	120.041	0.973983
ROFKEE	90.178	119.708	89.696	178.921	89.718	120.496	119.787	90.296	89.205	90.91	2.215	2.254	1.779	2.214	2.213		178.921	120.496	0.97375
LIJCOW	93.876	119.504	93.668	178.712	85.219	120.287	118.372	85.967	95.966	85.288	2.138	1.938	1.993	2.165	2.157		178.712	120.287	0.97375
PAKNOF	82.015	84.66	98.58	118.589	119.439	96.854	177.863	81.537	117.242	96.392	3.004	2.599	2.583	2.599	2.624		177.863	119.439	0.973733
SEHDER	85.114	179.347	119.683	116.869	94.715	95.962	84.407	84.632	95.162	120.929	2.355	2.16	2.172	1.518	2.161		179.347	120.929	0.973633
CAFSEJ	102.348	117.564	177.222	101.967	112.848	78.504	78.889	118.815	98.727	79.45	2.04	2.068	2.044	2.057	2.246		177.222	118.815	0.97345
CAJDUO	84.685	85.085	96.024	118.683	120.792	94.902	179.198	84.153	117.937	95.17	2.533	2.145	2.156	2.151	2.076		179.198	120.792	0.973433
MEMMOG	97.32	120.502	178.899	97.598	117.51	82.44	83.681	117.368	96.641	82.32	2.001	1.95	2.066	2.019	2.026		178.899	120.502	0.973283
JELHOA	178.359	81.405	100.708	100.654	116.38	119.962	80.671	77.913	98.599	114.844	2.155	1.754	2.025	2.049	2.021		178.359	119.962	0.973283
CINWUS	97.016	117.531	95.713	179.176	83.551	120.784	118.117	82.418	96.198	85.086	2.088	2.019	2.152	2.05	2.051		179.176	120.784	0.9732
XETLEP	90.183	118.946	177.485	98.026	119.103	82.068	87.31	118.975	98.993	83.382	1.871	2.379	2.327	2.333	2.387		177.485	119.103	0.973033
YOYNIJ	102.013	120.431	178.812	78.602	120.431	89.406	78.602	119.138	89.406	102.013	2.268	2.281	2.268	2.065	2.281		178.812	120.431	0.973017
TAMCUG01	83.859	85.256	119.745	94.411	94.975	118.328	84.132	178.124	119.116	97.379	1.921	2.431	2.268	2.38	2.383		178.124	119.745	0.972983
JAMGEK	77.488	77.535	101.522	117.893	109	100.968	177.361	76.92	118.999	105.669	2.24	1.933	1.925	1.932	1.785		177.361	118.999	0.9727
DOSYIT	178.451	93.796	86.93	85.349	118.272	119.977	94.44	94.573	84.886	120.103	2.185	2.66	1.775	1.777	1.796		178.451	120.103	0.972467
WODNEK	81.549	81.048	99.986	119.793	119.041	99.215	178.139	80.463	113.968	97.828	2.72	2.066	2.065	2.062	2.148		178.139	119.793	0.972433
REZCOO	81.946	179.515	113.685	121.172	93.518	98.313	81.946	85.997	98.313	121.172	2.695	1.769	1.733	1.711	1.769		179.515	121.172	0.972383
UMIQOW	102.306	118.148	177.382	98.401	113.5	80.141	79.88	119.04	99.944	79.211	2.037	2.082	2.064	2.041	2.202		177.382	119.04	0.972367
QOZCEO	178.649	78.304	101.27	100.552	109.656	120.314	77.467	80.53	102.025	118.758	2.276	2.027	1.957	2.042	2.031		178.649	120.314	0.97225
GOGQIC	178.998	92.047	87.756	88.615	120.123	120.664	91.418	92.281	87.889	118.881	2.12	2.36	2.245	2.248	2.233		178.998	120.664	0.972233
HOCHUC	96.823	178.16	119.827	119.697	83.747	82.534	95.75	96.475	84.631	116.85	2.027	2.1	2.155	2.087	2.018		178.16	119.827	0.972217
MOMBIA	173.523	76.903	100.238	99.728	114.907	115.19	76.386	77.034	109.574	114.687	2.317	2.228	2.088	2.084	2.113		173.523	115.19	0.972217
POTKOZ	98.158	118.655	96.519	178.592	83.322	120.27	117.093	82.914	95.351	83.772	2.298	2.314	2.213	2.284	2.284		178.592	120.27	0.972033
QOZDAL	99.347	119.823	178.145	102.485	116.074	78.407	81.283	114.334	99.786	78.775	1.943	2.022	1.97	2.008	2.275		178.145	119.823	0.972033
COHDEI	91.015	89.544	120.765	89.436	89.544	119.617	89.436	179.087	119.617	91.015	2.509	1.741	2.509	1.769	1.741		179.087	120.765	0.972033
WAGRAZ	90.531	89.794	89.67	89.794	90.531	89.67	119.491	121.019	179.339	119.491	1.778	2.201	1.778	2.201	1.782		179.339	121.019	0.972
FINJIV	117.997	90.301	121.001	90.049	179.321	89.557	121.001	90.049	90.301	89.764	2.229	2.229	2.27	2.275	2.206		179.321	121.001	0.972
HUTQIW	177.438	80.41	98.627	102.429	116.049	119.119	79.893	80.118	98.589	116.218	2.24	1.863	2.029	2.024	2.034		177.438	119.119	0.971983
REDDEL	85.542	120.998	179.314	82.409	114.777	96.85	93.837	120.9	83.726	97.672	2.288	2.235	1.77	1.781	2.319		179.314	120.998	0.971933
ASAQAN	95.581	95.133	83.548	119.833	117.938	83.875	178.146	98.26	118.631	83.591	1.592	2.315	2.316	2.313	2.309		178.146	119.833	0.971883
WOCSUE	98.181	98.553	81.11	113.984	118.612	79.757	177.476	102.219	119.164	80.264	2.432	2.073	2.095	2.08	2.763		177.476	119.164	0.971867
RANJAS	101.12	119.378	97.304	177.687	79.677	115.173	116.684	80.108	101.301	80.386	2.055	1.849	2.197	2.006	2.022		177.687	119.378	0.971817
CINWUS	95.91	118.54	97.072	179.012	83.846	120.704	116.74	83.294	97.058	82.784	2.079	2.025	2.117	2.037	2.062		179.012	120.704	0.9718
ZNTATE10	101.771	96.746	80.692	115.994	118.035	80.271	176.829	98.985	118.521	81.587	2.043	2.045	2.06	2.069	2.292		176.829	118.521	0.9718
FINZAG	85.484	85.903	95.341	120.102	120.503	92.947	178.81	88.689	118.412	91.632	2.064	2.137	2.129	2.144	2.163		178.81	120.503	0.971783
PABQAL	96.292	96.741	120.128	84.353	84.206	119.286	94.695	178.432	117.455	83.748	2.574	2.381	2.293	2.378	2.362		178.432	120.128	0.971733
AVIGES	87.969	87.834	91.285	119.698	118.966	92.607	179.251	88.053	120.956	92.262	1.872	2.565	2.567	2.567	1.874		179.251	120.956	0.971583
IHEPOC	79.863	80.266	114.318	98.063	99.106	118.848	80.303	177.14	118.224	102.395	2.165	2.009	2.322	1.981	1.965		177.14	118.848	0.971533
IRIKEA	176.701	77.65	102.805	103.666	118.412	118.296	78.505	78.518	99.091	111.06	2.187	2.283	1.975	2.079	2.071		176.701	118.412	0.971483
RANJUM	178.314	97.548	79.803	80.367	115.593	120.026	101.373	100.114	80.8	116.069	2.297	2.378	2.407	2.453	2.447		178.314	120.026	0.971467
FAKTET	104.309	114.539	175.855	97.805	115.727	77.408	78.944	117.571	103.244	78.31	2.02	2.012	2.006	2.049	2.264		175.855	117.571	0.9714
VUCYOJ	178.475	97.554	83.042	83.328	118.412	117.379	95.524	96.981	83.587	120.202	2.76	2.088	1.921	1.917	1.936		178.475	120.202	0.971217
ZEFTEL	98.462	177.372	112.388	119.094	80.062	79.608	102.673	99.807	79.381	119.102	2.069	2.077	2.094	2.274	2.049		177.372	119.102	0.971167
IYUGAK	101.784	101.319	77.669	116.714	110.581	78.58	179.249	101.416	120.999	79.305	1.941	2.115	2.111	2.11	2.208		179.249	120.999	0.970833
GOYGAC	93.308	93.659	86.537	121.51	119.115	86.576	179.76	94.169	118.127	85.758	2.268	2.019	2.015	2.025	1.944		179.76	121.51	0.970833
BODXEX	89.07	88.303	119.134	90.716	92.035	119.29	88.607	179.659	121.413	91.265	2.542	1.793	1.771	1.782	1.791		179.659	121.413	0.970767
FAJNOW	84.364	177.254	119.012	111.997	96.891	107.275	70.026	84.166	97.552	118.748	2.385	2.245	2.258	2.366	2.062		177.254	119.012	0.9707
NEDKUF	85.271	178.999	120.763	116.817	95.038	95.404	85.307	83.993	94.958	120.041	2.295	1.793	1.772	1.807	1.757		178.999	120.763	0.9706
MOJKAY	96.266	100.633	81.185	118.908	116.966	81.762	177.14	98.528	117.74	81.663	2.033	2.072	2.068	2.06	2.242		177.14	118.908	0.970533
LIXGEF	178.783	94.625	85.916	86.038	119.952	118.135	94.155	92.884	86.408	120.552	2.276	1.946	2.022	2.013	2.019		178.783	120.552	0.970517
QOZCUE	178.421	78.216	102.1	98.549	113.469	115.153	77.765	80.218	103.219	120.191	2.349	2.041	1.952	2.043	2.02		178.421	120.191	0.9705
AMOZEH	95.683	119.418	93.705	178.343	86.135	120.115	118.908	85.973	93.095	85.423	2.235	1.961	2.196	2.229	2.232		178.343	120.115	0.970467
GAJHIK	87.438	91.089	91.944	119.82	119.909	88.036	178.494	90.946	120.268	90.553	2.082	1.959	1.99	2.024	2.078		178.494	120.268	0.970433
MANJUJ	178.546	81.801	98.832	94.394	118.27	116.999	82.571	84.546	97.855	120.321	2.116	2.2	2.15	2.146	2.155		178.546	120.321	0.970417
RACMOZ	98.529	98.166	81.941	118.624	116.714	83.26	177.979	95.461	119.756	82.604	2.312	1.803	1.813	1.813	2.272		177.979	119.756	0.970383
EQAZON	104.611	100.558	77.279	111.576	115.363	77.481	177.824	102.036	119.602	78.104	2.427	2.061	2.075	2.07	2.191		177.824	119.602	0.970367
GEYRUZ	82.666	82.449	96.008	117.591	119.277	100.052	177.498	82.99	118.363	95.792	2.767	2.135	2.133	2.138	1.925		177.498	119.277	0.97035
KEVJEA	179.365	85.381	93.394	94.15	116.784	120.578	86.036	86.386	94.675	121.145	2.841	2.135	2.227	2.221	2.202		179.365	121.145	0.970333
MEBSOD	110.471	113.703	174.585	101.224	109.492	75.008	74.516	116.367	104.191	74.244	2.003	1.997	2.043	2.017	2.483		174.585	116.367	0.9703
PADGAE	179.334	81.714	96.833	97.013	115.844	118.02	83.457	82.326	98.662	121.117	2.538	1.751	1.754	1.755	1.759		179.334	121.117	0.970283
ROCNOM	175.179	73.569	103.986	111.024	112.294	116.967	72.883	73.61	105.196	107.048	2.502	2.357	2.155	2.162	2.168		175.179	116.967	0.9702
RAQDET	178.424	85.488	94.371	95.522	118.032	120.218	84.063	85.416	95.172	119.481	2.062	1.926	2.106	2.093	2.111		178.424	120.218	0.9701
TUXJUT	83.396	82.682	98.685	119.49	117.973	95.387	177.682	84.583	118.809	95.23	2.79	1.775	1.779	1.784	1.746		177.682	119.49	0.969867
XUGDEK	177.42	98.926	81.391	80.902	117.907	119.229	100.875	96.945	80.921	115.77	2.076	2.285	2.062	2.048	2.042		177.42	119.229	0.96985
HAGXOD	86.549	121.508	86.427	179.694	94.047	120.7	116.622	93.374	86.245	93.343	2.077	2.004	2.029	2.073	2.084		179.694	121.508	0.969767
VOZNAZ	178.925	91.205	88.515	90.05	120.522	118.705	90.477	90.145	89.606	120.74	2.306	1.776	1.779	1.774	1.767		178.925	120.74	0.96975
VOZNAZ10	178.925	91.205	88.515	90.05	120.522	118.705	90.477	90.145	89.606	120.74	2.306	1.776	1.779	1.774	1.767		178.925	120.74	0.96975
HUPKIO	100.656	102.634	76.074	111.821	115.918	74.695	174.098	109.648	114.458	76.221	2.68	2.36	2.356	2.422	2.471		174.098	115.918	0.969667
ASPHNI	178.457	85.481	94.721	95.018	120.278	119.628	84.037	86.382	94.356	118.104	1.875	2.207	2.338	2.314	2.318		178.457	120.278	0.96965
YEPDOM	177.251	80.988	100.202	101.321	119.075	116.411	81.026	80.2	96.265	116.888	2.269	2.187	2.051	2.034	2.034		177.251	119.075	0.9696
VAJPOM	82.901	116.124	83.744	179.495	96.885	121.32	118.298	97.516	82.669	96.297	2.055	2.011	1.954	2.053	2		179.495	121.32	0.969583
WELMOP	177.609	93.207	86.792	83.357	118.932	119.355	95.314	96.557	84.763	119.434	2.171	2.666	1.772	1.753	1.785		177.609	119.434	0.969583
ORUVUT	178.965	94.4	86.539	86.838	117.869	120.329	92.813	92.805	86.625	120.797	1.976	1.948	2.027	2.019	2.011		178.965	120.797	0.969467
EDAVAI	82.225	97.507	83.205	82.576	94.936	99.518	118.817	118.003	176.98	118.37	1.959	2.424	1.957	1.951	1.903		176.98	118.817	0.969383
GEYPAB	82.637	177.997	118.897	119.835	98.115	96.369	84.121	83.354	95.437	117.316	2.289	1.803	1.779	1.832	1.782		177.997	119.835	0.969367
QOMTIV	102.649	101.254	77.197	113.608	113.375	76.85	177.593	103.525	119.431	78.667	2.24	2.069	2.042	2.087	2.239		177.593	119.431	0.969367
SINWIW	100.765	101.146	77.206	118.463	111.818	77.559	176.624	105.103	116.397	78.266	2.618	2.08	2.077	2.086	2.233		176.624	118.463	0.96935
DEJVAP	90.061	90.5	89.84	116.6	121.657	89.55	179.901	89.578	121.742	90.468	2.348	1.952	1.943	1.94	2.357		179.901	121.742	0.969317
VODCIA	96.417	96.866	84.455	120.265	115.609	82.65	179.128	94.435	120.972	85.133	1.95	2.061	2.077	2.083	2.054		179.128	120.972	0.969267
AMIQOE	99.58	97.372	80.318	113.272	119.642	80.946	177.944	100.299	119.79	81.595	2.287	2.317	2.321	2.281	2.065		177.944	119.79	0.969233
OGELUH	94.586	119.713	93.977	178.576	86.047	120.424	118.538	86.785	92.934	85.692	2.278	2.146	2.165	2.287	2.279		178.576	120.424	0.9692
MIRNUY	99.795	105.577	77.227	118.404	111.812	77.415	176.552	103.432	115.303	76.739	1.931	2.072	2.06	2.072	2.219		176.552	118.404	0.969133
MADCUS	86.224	87.662	92.925	120.965	119.51	92.526	179.11	88.162	118.889	92.5	2.338	1.774	1.794	1.793	1.781		179.11	120.965	0.969083
HAVSOP	99.427	100.785	79.595	120.458	111.532	78.839	178.6	103.513	116.893	77.867	2.079	2.087	2.122	2.084	2.236		178.6	120.458	0.969033
RACMIT	179.875	96.652	83.036	82.146	121.738	116.044	96.991	97.734	83.444	117.656	2.313	2.236	1.816	1.812	1.805		179.875	121.738	0.96895
CPETCP	90.341	121.389	90.822	179.524	89.649	119.26	119.319	89.184	90.625	89.384	2.182	2.287	2.274	2.187	2.2		179.524	121.389	0.968917
QOWFAK	121.422	121.422	87.035	93.198	87.035	93.198	89.777	89.777	117.156	179.553	1.909	2.006	2.268	2.006	2.268		179.553	121.422	0.96885
WIDHOJ	179.135	93.894	86.16	85.78	121.011	118.5	94.544	93.435	86.205	119.077	2.272	1.948	2.032	2.044	2.029		179.135	121.011	0.968733
ZOJMEQ	120.789	89.876	118.411	89.986	178.908	90.573	120.789	89.033	90.573	89.986	2.511	2.529	2.327	2.34	2.529		178.908	120.789	0.96865
VUHZIH	118.17	90.428	120.91	90.079	179.013	90.079	120.91	90.079	90.428	88.935	2.555	2.555	2.278	2.284	2.543		179.013	120.91	0.968383
TMATBI	117.516	89.635	121.241	90.705	179.344	91.199	121.241	90.705	89.635	88.145	2.444	2.444	2.364	2.269	2.4		179.344	121.241	0.968383
CAJFEA	80.575	80.579	97.096	116.598	118.712	98.628	176.81	80.096	116.541	102.947	2.723	2.128	2.128	2.126	1.969		176.81	118.712	0.9683
WASFIF	100.017	120.218	97.822	178.315	81.042	115.375	116.912	80.908	99.635	80.498	2.072	2.054	2.254	2.084	2.081		178.315	120.218	0.968283
HINPAV	178.24	97.275	82.245	80.1	116.021	117.151	99.504	99.122	81.701	120.156	2.442	2.173	1.916	1.913	1.94		178.24	120.156	0.968067
DIMQAT	178.563	97.137	82.927	82.039	118.407	120.482	96.946	99.291	81.718	115.704	1.945	2.012	2.057	2.067	2.039		178.563	120.482	0.968017
ODUKEF	90.004	92.248	88.843	120.766	118.7	88.4	178.844	91.174	120.417	89.352	2.411	2.026	2.037	2.026	2.269		178.844	120.766	0.967967
XUGLER	177.797	78.668	99.844	100.929	116.204	119.72	78.527	81.134	100.993	114.169	2.203	1.985	1.955	2.059	2.061		177.797	119.72	0.96795
PENCAP	94.4	179.223	117.289	119.965	85.608	85.552	94.564	93.677	86.225	121.147	1.824	2.223	2.185	2.02	2.249		179.223	121.147	0.967933
NUDVOZ	99.476	178.266	120.19	112.461	80.186	79.71	98.607	100.362	81.787	119.383	1.886	2.2	2.096	2.013	2.061		178.266	120.19	0.967933
PEVHAC	97.137	96.628	83.707	118.365	120.513	83.966	178.581	95.231	117.529	83.36	2.215	2.275	2.272	2.276	2.195		178.581	120.513	0.9678
CLTAMV	118.069	90.421	120.965	90.078	179.03	89.616	120.965	90.078	90.421	89.414	2.242	2.242	2.232	2.196	2.237		179.03	120.965	0.96775
UKACIS	178.824	100.404	80.333	82.583	114.628	117.659	98.632	97.511	80.602	120.762	1.915	2.061	2.036	2.15	2.057		178.824	120.762	0.9677
LELFAM	76.571	76.125	105.7	117.165	115.703	106.593	175.225	76.238	110.845	98.998	2.278	2.04	2.076	2.066	2.279		175.225	117.165	0.967667
HUYRUO	92.824	117.739	93.932	178.678	86.063	120.196	120.621	86.362	95.24	85.594	2.215	1.942	2.184	2.214	2.242		178.678	120.621	0.967617
LIXGOP	178.716	94.214	84.162	86.69	118.769	118.932	94.554	94.015	86.379	120.66	2.283	1.971	2.003	2.01	2.002		178.716	120.66	0.9676
GAMQIV	103.025	178.311	112.879	120.26	77.148	78.71	102.503	101.248	77.468	113.688	2.243	1.924	1.911	2.154	1.912		178.311	120.26	0.967517
PUQJOA	75.621	102.801	77.49	82.27	99.266	102.679	116.913	120.185	178.236	111.045	1.908	2.324	1.966	1.939	1.952		178.236	120.185	0.967517
YIKTOB	89.183	90.327	90.187	120.686	118.474	90.794	178.877	89.476	120.83	90.046	2.633	1.779	1.783	1.772	1.737		178.877	120.83	0.96745
HIMNEW	80.804	120.048	81.647	178.093	99.34	118.904	114.068	97.424	81.014	99.767	1.97	2.241	2.017	1.957	1.958		178.093	120.048	0.967417
HOKZUE	102.17	107.81	177.999	105.08	113.432	74.648	76.166	119.96	107.029	75.011	2.061	1.978	2.057	2.026	2.377		177.999	119.96	0.967317
DURSOZ	99.518	118.726	176.765	97.287	113.785	73.77	80.975	118.569	103.284	85.225	2.182	2.151	2.139	2.156	1.405		176.765	118.726	0.967317
RINCAU	121.889	179.918	97.848	93.316	58.482	58.149	121.889	121.436	58.149	93.316	2.228	2.477	2.456	2.625	2.477		179.918	121.889	0.96715
LOCXAC	101.319	117.498	104.875	175.524	78.425	115.342	116.002	78.932	97.606	78.856	2.023	1.748	2.198	2.017	2.036		175.524	117.498	0.9671
ONAYEJ	99.864	99.373	80.865	112.456	117.328	79.793	179.108	101.272	121.085	78.88	2.201	2.344	2.375	2.347	2.128		179.108	121.085	0.96705
OJIPAY	93.833	93.481	85.718	120.15	120.434	85.426	178.454	96.078	117.605	85.422	1.936	2.165	2.134	2.153	2.024		178.454	120.434	0.967
YAQQUE	100.136	176.33	110.146	118.31	76.754	76.105	106.247	104.41	76.319	115.443	2.321	2.08	2.086	2.307	2.089		176.33	118.31	0.967
DAMYUL	176.866	81.602	95.281	97.544	116.676	118.848	82.067	82.351	101.192	118.771	2.194	1.986	2.142	2.125	2.133		176.866	118.848	0.966967
ABEWAH	84.701	85.015	95.393	120.881	120.027	95.915	178.899	84.595	116.624	94.422	2.562	2.113	2.138	2.108	2.425		178.899	120.881	0.966967
LIHZIL	93.963	119.665	94.813	179.191	85.443	117.539	121.174	85.906	93.933	85.935	2.128	1.965	2.003	2.156	2.143		179.191	121.174	0.96695
TUXJUT	82.516	84.109	96.939	117.669	118.719	94.689	178.177	84.801	120.162	96.985	2.795	1.782	1.776	1.79	1.724		178.177	120.162	0.966917
MAWKOK	118.538	98.188	117.996	78.405	176.55	97.691	117.222	80.909	99.218	85.662	2.314	2.312	2.342	1.777	2.319		176.55	118.538	0.966867
PAMJIX	178.073	93.873	83.365	85.284	120.061	118.865	96.763	96.33	84.395	118.203	2.196	2.671	1.783	1.78	1.779		178.073	120.061	0.966867
LOBXIL	86.021	121.03	179.38	84.414	115.721	94.699	93.556	121.383	85.909	95.426	2.375	1.889	2.432	2.377	1.961		179.38	121.383	0.966617
JIJGAK	80.653	86.024	118.35	97.357	95.209	119.986	80.068	177.978	116.271	100.651	2.609	1.692	1.835	1.734	1.757		177.978	119.986	0.966533
VEYDIO	79.277	79.289	96.825	116.343	115.93	102.144	176.044	80.046	118.052	102.448	2.8	2.153	2.137	2.147	1.897		176.044	118.052	0.966533
DOSYIT01	178.399	93.565	86.727	85.412	118.256	119.688	94.65	94.58	85.037	120.411	2.191	2.661	1.764	1.779	1.785		178.399	120.411	0.966467
PODTUZ	118.644	82.983	99.142	119.017	83.104	177.005	94.102	117.44	81.727	98.901	2.304	1.89	1.92	2.577	2.349		177.005	119.017	0.966467
YAQQUE	103.424	176.125	114.402	118.138	75.751	76.501	107.129	101.45	75.897	110.537	2.314	2.101	2.09	2.301	2.098		176.125	118.138	0.96645
SARCEW	99.519	99.821	79.819	114.989	121.278	80.765	179.265	101.343	114.423	78.688	1.951	2.065	2.098	2.088	2.22		179.265	121.278	0.96645
PIYHOU	177.525	101.451	80.765	80.085	116.62	115.786	99.492	97.693	80.588	119.544	2.365	2.182	1.961	1.955	1.977		177.525	119.544	0.96635
REYFIK	118.901	85.205	118.417	96.914	178.379	85.2	120.398	94.811	84.484	93.402	2.386	2.411	1.903	1.897	2.387		178.379	120.398	0.96635
DPASNI10	177.942	93.639	85.836	83.914	118.564	119.084	93.767	98.023	84.801	119.964	2.994	2.307	2.351	2.359	2.338		177.942	119.964	0.9663
WAVVUL	85.182	119.092	85.021	177.854	95.546	119.877	119.117	92.749	85.972	95.51	2.229	2.207	2.223	2.232	2.232		177.854	119.877	0.966283
UJUPEV	97.442	96.872	83.051	118.334	121.477	83.113	179.453	96.451	115.901	83.098	2.212	2.16	2.14	2.131	2.052		179.453	121.477	0.966267
YICTUB	90.124	90.528	118.058	89.333	90.528	120.971	89.333	178.944	120.971	90.124	1.896	1.789	1.896	1.801	1.789		178.944	120.971	0.966217
WEMFIG	121.567	82.809	102.277	109.677	77.805	179.538	97.588	119.037	77.692	101.785	2	2.018	2.032	2.248	2.029		179.538	121.567	0.966183
REPHOL	178.592	94.998	86.008	85.224	120.623	119.187	95.146	93.513	85.126	118.321	2.196	2.672	1.785	1.773	1.778		178.592	120.623	0.96615
RENGUP	86.686	53.955	88.333	164.984	99.641	104.622	50.828	107.022	83.292	104.977	2.996	2.321	2.347	3.062	3.24		164.984	107.022	0.966033
WEMBUO	119.367	81.246	101.806	108.606	77.14	178.929	98.082	120.969	77.853	103.928	1.986	2.049	2.027	2.294	2.036		178.929	120.969	0.966
MALMEU	93.185	92.26	86.73	118.13	119.794	87.345	179.475	92.006	121.516	88.491	1.832	2.059	2.063	2.054	1.928		179.475	121.516	0.965983
FOJBOV02	90.4	89.654	117.298	89.961	89.654	121.351	89.961	179.307	121.351	90.4	1.805	1.805	1.805	1.755	1.805		179.307	121.351	0.965933
UDOQOU	95.656	118.401	176.462	101.317	118.508	80.263	80.87	115.355	100.937	80.882	2.021	1.918	2.077	2.052	2.108		176.462	118.508	0.9659
ZESYUR	82.848	83.173	97.52	117.928	120.421	95.267	178.372	85.857	118.376	95.352	2.649	1.765	1.773	1.789	1.788		178.372	120.421	0.96585
APUCIZ	68.247	69.379	109.567	116.86	108.637	105.471	69.817	174.809	109.048	106.653	3.018	2.334	1.925	2.315	2.31		174.809	116.86	0.965817
LIXGOP	92.498	94.679	87.193	118.592	118.531	85.071	179.425	94.648	121.477	85.926	2.291	2.025	2.018	2.006	1.953		179.425	121.477	0.9658
VEPWUI	83.347	84.323	118.325	94.931	95.97	118.443	84.916	178.141	120.196	96.539	2.562	1.776	1.804	1.789	1.797		178.141	120.196	0.96575
WODNIO	175.939	77.879	99.558	104.649	114.71	117.999	78.636	79.404	99.964	115.929	2.807	2.284	2.095	2.085	2.092		175.939	117.999	0.965667
LORBAW	178.729	95.345	86.135	86.609	120.793	118.346	93.824	92.309	85.787	119.541	2.279	1.931	2.03	2.021	2.012		178.729	120.793	0.9656
FECXUJ	100.046	119.487	98.28	178.476	81.269	113.324	120.542	81.332	97.451	81.516	1.96	1.797	2.208	1.961	1.954		178.476	120.542	0.965567
QENNUV	78.834	79.9	98.732	119.195	114.299	102.665	177.125	81.229	117.6	98.759	1.432	1.776	1.771	1.775	2.268		177.125	119.195	0.9655
WAVVEV	85.505	118.941	84.485	177.909	93.526	119.979	119.006	93.247	85.624	97.59	2.226	2.207	2.297	2.234	2.23		177.909	119.979	0.9655
QAMKUK	178.59	75.968	105.561	107.045	105.726	113.186	73.895	74.305	103.164	120.661	2.493	1.966	2.014	2.033	2.006		178.59	120.661	0.965483
JARHUF	90.389	120.85	89.573	178.778	92.384	120.295	118.744	90.794	86.745	90.127	2.258	2.086	2.095	1.804	2.253		178.778	120.85	0.965467
PIFFEP	178.717	84.755	96.466	95.959	115.259	120.537	82.257	84.611	96.026	120.793	2.285	1.81	1.787	1.793	1.784		178.717	120.793	0.9654
RABFUV	99.414	94.523	82.077	116.806	119.887	83.346	177.81	98.938	118.134	81.744	1.98	2.069	2.037	2.054	1.941		177.81	119.887	0.965383
XITKAN	62.163	63.247	118.518	119.7	114.378	55.166	62.146	177.622	115.565	116.835	2.615	2.802	2.305	2.827	2.821		177.622	119.7	0.965367
LORBAW	93.678	94.015	86.042	120.784	119.604	87.227	178.706	93.042	118.457	86.021	2.299	2.033	2.043	2.029	1.919		178.706	120.784	0.965367
HUYSAV	93.856	120.059	92.632	177.98	86.131	119.294	119.189	86.249	95.551	85.563	2.242	1.932	2.216	2.226	2.232		177.98	120.059	0.96535
TEDDEM	96.227	119.368	93.227	178.047	84.738	118.122	120.129	84.998	95.957	84.839	2.068	1.939	2.023	2.074	2.074		178.047	120.129	0.9653
YAQCEZ	121.4	121.191	58.854	95.964	94.555	59.219	179.315	120.7	96.641	58.622	2.351	2.457	2.462	2.459	2.589		179.315	121.4	0.96525
TUXJUT	84.16	83.451	96.06	119.039	120.424	94.985	178.331	83.537	116.985	97.78	2.79	1.772	1.783	1.765	1.753		178.331	120.424	0.965117
EQAZON02	100.512	104.775	114.973	77.507	77.248	111.624	102.055	177.742	119.837	77.954	2.424	2.073	2.193	2.064	2.076		177.742	119.837	0.965083
TAFVIF01	84.21	85.682	94.953	120.319	121.098	95.185	179.002	85.591	116.477	94.374	2.531	1.816	1.792	1.809	1.795		179.002	121.098	0.965067
ADOYEY	84.231	84.022	95.189	116.798	121.034	97.044	178.933	83.65	118.892	95.828	2.685	2.099	2.108	2.107	2.403		178.933	121.034	0.964983
UFEPUS	84.18	119.5	87.713	179.009	90.957	118.717	121.114	95.256	90.03	91.888	1.875	1.986	1.948	1.945	1.955		179.009	121.114	0.964917
HIZVUH	174.919	78.513	102.643	101.787	117.027	113.073	81.272	73.417	102.625	116.565	2.499	1.786	1.76	1.777	1.765		174.919	117.027	0.964867
QAPLEB	179.184	85.879	95.998	95.426	120.143	121.295	84.481	84.942	93.307	116.404	1.917	1.984	2.523	2.491	2.417		179.184	121.295	0.964817
HUYSEZ	95.308	120.224	95.473	178.112	85.92	118.907	119.182	85.615	92.192	85.494	2.236	1.945	2.199	2.224	2.229		178.112	120.224	0.9648
TAGGAL	95.865	177.79	118.282	119.849	84.947	85.777	95.327	92.842	85.274	119.902	2.173	2.14	2.142	2.126	2.149		177.79	119.902	0.9648
JANXUR	86.994	80.469	92.432	119.958	120.148	98.158	178.029	88.797	118.011	93.122	2.548	1.74	1.748	1.779	1.739		178.029	120.148	0.964683
KAXLAY	86.185	178.597	120.718	119.157	95.745	94.828	86.53	83.902	92.812	118.337	2.621	1.763	1.78	1.811	1.734		178.597	120.718	0.96465
ODAGUW	104.748	102.434	75.961	108.435	114.154	74.957	177.206	106.326	119.329	75.852	2.335	2.132	2.161	2.173	2.341		177.206	119.329	0.964617
KUSGEL	91.751	93.428	87.774	121.09	118.465	87.605	178.966	92.4	119.87	87.062	2.414	2.206	2.198	2.205	2.334		178.966	121.09	0.9646
CIPRUO	178.633	103.619	76.023	76.522	120.757	110.598	105.021	102.21	76.722	112.576	2.024	2.293	2.005	2.044	2.06		178.633	120.757	0.9646
YIQLIT	92.573	119.783	85.854	178.596	86.551	120.726	119.388	87.203	94.761	93.047	1.864	2.1	2.11	1.859	1.863		178.596	120.726	0.9645
CBFMOP	89.225	89.225	90.59	90.198	90.59	90.198	120.584	120.584	178.451	118.832	1.764	2.155	1.76	2.155	1.76		178.451	120.584	0.96445
RAWPEN	65.199	176.549	102.043	97.889	118.684	115.481	61.626	61.296	117.899	101.798	2.482	2.715	2.803	1.903	2.748		176.549	118.684	0.964417
YOXXEQ	94.363	94.151	85.505	121.974	118.944	85.827	179.838	94.709	117.323	85.441	2.287	1.924	1.931	1.938	2.054		179.838	121.974	0.9644
GUJLEC	93.954	119.513	94.977	177.789	84.826	117.961	119.927	84.272	97.211	84.792	2.309	2.002	2.25	2.315	2.309		177.789	119.927	0.964367
WEMDIE	119.092	79.883	100.297	114.531	78.806	176.953	100.033	114.985	77.186	103.908	1.942	2.035	2.009	2.277	2.027		176.953	119.092	0.96435
IPUSAO	89.743	88.925	90.439	119.151	120.914	89.932	178.773	90.557	119.929	90.415	1.906	2.152	2.156	2.158	1.902		178.773	120.914	0.964317
UJOGUX	179.208	76.531	101.938	99.183	115.974	121.352	77.27	81.112	103.961	110.395	2.318	2.033	1.967	2.058	2.062		179.208	121.352	0.964267
BICDAV	118.139	81.595	113.486	105.75	175.991	77.928	117.089	100.096	76.409	98.077	2.362	1.874	1.935	2.439	2.344		175.991	118.139	0.9642
LEFXID	178.003	93.652	86.156	85.708	119.174	120.152	95.697	92.727	86.042	119.207	1.972	2.015	2.15	2.123	2.132		178.003	120.152	0.964183
LOBXIL	84.721	118.842	84.398	177.618	93.232	118.684	119.769	96.84	84.433	96.345	2.408	1.884	1.927	2.406	2.415		177.618	119.769	0.96415
KEMLUJ	86.965	87.043	93.412	119.277	120.736	91.581	178.582	86.811	119.14	94.191	2.738	1.826	1.747	1.719	1.79		178.582	120.736	0.9641
LEWXIU	85.242	119.336	86.423	178.246	95.134	118.284	120.401	93.626	84.274	95.308	2.243	2.183	2.305	2.24	2.222		178.246	120.401	0.964083
LEWXIU10	85.242	119.336	86.423	178.246	95.134	118.284	120.401	93.626	84.274	95.308	2.243	2.183	2.305	2.24	2.222		178.246	120.401	0.964083
PEWBOK	81.304	80.591	98.42	121.539	112.627	99.087	179.381	83.341	119.725	97.274	1.625	1.921	1.908	2.262	2.277		179.381	121.539	0.964033
RAQDET	179.221	84.341	94.864	93.751	116.474	120.012	85.592	85.472	95.967	121.385	2.046	1.958	2.11	2.113	2.083		179.221	121.385	0.963933
PUDDAV	177.936	94.163	86.868	87.36	120.101	119.461	94.013	90.582	87.017	119.667	1.759	2.197	2.15	2.156	2.144		177.936	120.101	0.963917
WIDHOJ	178.964	93.405	86.607	86.423	121.13	118.204	94.389	93.328	85.868	119.426	2.278	1.944	2.029	2.027	2.032		178.964	121.13	0.9639
SARCIA	99.988	100.394	81.367	115.58	120.784	79.278	178.607	100.238	114.396	78.831	1.968	2.049	2.119	2.078	2.268		178.607	120.784	0.963717
FUZMAO	85.9	85.9	120.551	94.944	94.944	120.551	84.895	178.369	117.116	93.473	2.227	1.783	1.801	1.783	1.792		178.369	120.551	0.963633
GUPWOE	98.562	115.963	99.3	178.782	80.539	116.122	120.972	81.079	98.606	81.869	2.088	2.06	2.262	2.075	2.067		178.782	120.972	0.9635
FOJBOV03	90.395	121.115	178.923	90.162	121.115	89.462	90.162	117.769	89.462	90.395	1.804	1.811	1.804	1.801	1.811		178.923	121.115	0.963467
PIDLOE	93.352	119.379	96.863	177.24	85.428	119.287	119.434	84.939	93.545	85.869	2.226	1.908	2.179	2.225	2.256		177.24	119.434	0.963433
GEGCED	121.896	118.183	98.436	81.704	93.836	85.865	98.436	81.704	118.183	179.701	2.03	2.03	2.423	2.198	2.138		179.701	121.896	0.963417
DAJKIL	97.549	120.583	96.835	178.385	81.814	113.838	119.812	82.069	99.712	82.028	2.015	2.348	2.479	2.002	2.004		178.385	120.583	0.963367
SITSOD	82.641	178.133	116.139	118.107	100.792	95.034	83.269	80.773	97.448	120.332	2.515	1.758	1.701	1.751	1.722		178.133	120.332	0.96335
HEQWEF	178.301	82.415	96.901	98.94	120.449	113.527	81.541	82.467	97.636	120.5	2.014	1.967	2.033	2.055	2.074		178.301	120.5	0.96335
PICGEO	77.445	117.833	83.237	176.008	99.772	116.642	118.208	98.564	82.172	98.89	1.839	2.328	1.772	1.842	1.869		176.008	118.208	0.963333
FUTWIB	95.967	118.295	94.674	179.313	85.119	117.817	121.514	84.692	94.734	84.806	2.219	1.803	2.146	2.222	2.218		179.313	121.514	0.963317
TAYPAK	178.526	91.49	86.616	85.96	120.729	118.432	93.573	92.686	89.703	120.235	1.789	1.912	1.777	1.765	1.768		178.526	120.729	0.963283
WAVDIG	96.911	118.584	94.645	179.208	84.2	121.416	117.256	83.669	95.044	85.557	2.155	1.827	2.046	2.114	2.18		179.208	121.416	0.9632
MIRNOS	98.665	175.704	115.011	114.837	78.795	78.627	102.692	103.941	77.116	117.914	1.966	2.076	2.054	2.231	2.069		175.704	117.914	0.963167
WAVVIZ	93.208	118.498	95.218	178.701	85.822	120.915	118.71	85.609	95.221	84.893	2.235	2.291	2.203	2.228	2.212		178.701	120.915	0.9631
FOKYUZ	84.412	82.8	97.192	120.09	120.107	97.659	177.892	84.641	116.52	93.361	2.581	1.759	1.792	1.757	1.766		177.892	120.107	0.963083
PONYIC	173.493	109.325	69.32	70.63	100.508	113.159	105.853	115.711	69.759	112.448	2.398	2.616	2.249	2.248	2.243		173.493	115.711	0.963033
SABGEI	100.484	178.297	111.534	119.311	80.66	79.135	99.226	99.86	80.61	120.516	1.962	2.194	2.191	2.282	2.046		178.297	120.516	0.963017
NESVOW	88.406	120.03	90.302	178.447	92.578	120.671	119.241	90.427	88.893	89.375	1.861	2.254	2.215	1.872	1.871		178.447	120.671	0.962933
WAVDIG10	96.957	118.289	94.647	179.268	84.548	121.495	117.525	83.696	94.844	85.332	2.155	1.829	2.045	2.121	2.179		179.268	121.495	0.962883
VEXSOH	104.904	110.558	106.565	176.036	73.78	112.365	118.266	75.309	102.577	76.541	2.301	1.916	2.203	2.38	2.3		176.036	118.266	0.962833
IBIQAO	96.304	115.725	175.717	101.957	117.956	80.059	79.419	117.151	102.183	79.972	2.317	2.048	2.349	2.314	2.304		175.717	117.956	0.962683
NOQKOT	96.808	99.973	82.157	120.648	119.056	81.576	178.404	97.431	114.499	82.098	2.285	2.109	2.091	2.104	2.11		178.404	120.648	0.9626
MECCOM	117.391	121.588	179.343	62.221	121.588	90.328	62.221	116.824	90.328	117.391	2.405	2.546	2.405	2.223	2.546		179.343	121.588	0.962583
RIBZEK	77.432	117.24	80.434	174.992	102.221	113.684	115.034	101.521	74.206	104.351	2.39	1.389	1.869	2.406	2.392		174.992	117.24	0.962533
CIQHUF	179.229	89.75	83.402	87.596	117.975	119.607	96.935	92.812	89.481	121.484	2.231	2.136	1.785	1.789	1.772		179.229	121.484	0.962417
KUDJIC	83.348	84.264	94.459	119.167	118.539	95.834	177.505	86.504	119.761	95.622	2.565	1.734	1.758	1.757	2.289		177.505	119.761	0.9624
PEFYUU	98.884	119.418	100.113	177.162	82.41	119.354	115.673	82.441	94.756	81.486	2.313	1.882	2.224	2.302	2.292		177.162	119.418	0.9624
CUXJIQ	104.732	107.797	75.098	118.777	108.201	75.295	176.52	103.072	113.207	74.201	2.29	2.037	2.037	2.021	2.43		176.52	118.777	0.962383
AKEJAD	118.623	121.428	95.536	85.286	94.671	84.809	89.201	90.519	119.945	179.168	1.855	2.161	2.181	2.156	2.181		179.168	121.428	0.962333
RIJQUZ	87.909	119.632	89.215	178.514	86.8	120.776	119.586	91.855	92.041	92.177	1.889	2.166	2.157	1.867	1.832		178.514	120.776	0.9623
YUBBAY	97.823	175.214	116.938	117.478	78.208	78.337	106.424	99.94	79.315	114.208	2.019	2.053	2.053	2.27	2.022		175.214	117.478	0.962267
DONQON	86.202	92.984	120.674	92.984	86.202	120.674	90.796	178.408	118.653	90.796	2.261	2.041	2.261	2.041	2.001		178.408	120.674	0.962233
LOBXIL	83.346	117.703	85.546	177.9	93.31	120.168	119.412	97.451	84.602	95.723	2.436	1.881	1.917	2.4	2.4		177.9	120.168	0.9622
FOKYUZ	83.526	83.34	95.39	118.618	117.664	98.715	177.945	84.414	120.214	94.602	2.534	1.735	1.723	1.813	1.821		177.945	120.214	0.962183
WUVNOR	177.176	97.934	80.464	79.59	119.448	116.473	101.679	101.022	79.413	114.892	2.076	2.299	2.381	2.398	2.352		177.176	119.448	0.962133
AKEJAD01	90.511	88.997	94.556	85.287	95.751	84.92	121.235	118.274	178.962	120.488	1.854	2.181	2.162	2.178	2.154		178.962	121.235	0.962117
UFOXAO	83.149	179.034	121.311	115.582	96.904	95.928	84.777	83.303	95.915	119.604	2.646	1.794	1.762	1.786	1.792		179.034	121.311	0.96205
VOKTIA	110.361	105.947	70.361	101.484	117.503	69.575	175.223	112.389	109.063	71.754	2.426	2.256	2.256	2.305	2.584		175.223	117.503	0.962
COPLIC01	83.885	84.337	95.5	121.359	117.202	96.569	179.072	83.275	118.012	96.47	2.38	1.788	1.786	1.776	1.81		179.072	121.359	0.961883
LURMEQ	90.616	89.897	90.854	89.992	88.483	90.179	119.063	120.178	178.446	120.738	1.823	1.819	1.807	1.806	1.804		178.446	120.738	0.9618
ZAWQIX	82.342	83.532	98.591	119.658	118.914	98.185	177.363	82.861	116.924	94.545	2.864	1.79	1.796	1.777	1.8		177.363	119.658	0.96175
MEPRUC	91.002	91.002	89.953	120.413	120.413	89.953	178.113	88.064	119.175	90.05	2.345	1.904	1.876	1.904	2.335		178.113	120.413	0.961667
PAFGEJ	92.534	118.834	178.411	96.24	118.577	84.786	86.256	120.714	94.908	85.268	2.153	1.971	2.124	2.161	2		178.411	120.714	0.961617
JUQZIE	88.255	90.135	89.824	120.376	120.192	90.929	178.073	88.927	119.359	91.925	1.877	2.171	2.151	2.148	1.924		178.073	120.376	0.961617
YEQSOF	177.261	98.374	81.961	81.329	118.604	119.565	100.448	96.403	81.456	115.51	2.051	2.247	2.052	2.046	2.037		177.261	119.565	0.9616
KITXUG	93.967	92.626	85.715	118.751	118.085	87.582	179.679	94.245	121.988	85.871	2.408	2.201	2.195	2.196	2.339		179.679	121.988	0.961517
XIHBEV	98.861	82.102	89.059	82.102	98.861	89.059	120.435	119.131	178.118	120.435	2.407	2.077	2.407	2.077	2.092		178.118	120.435	0.961383
SIGPAB	93.48	102.636	119.071	84.95	75.549	115.804	105.475	176.745	115.275	77.777	2.429	2.46	2.359	1.923	1.902		176.745	119.071	0.961233
AFAJIB	100.213	99.52	115.731	79.386	80.757	121.914	99.656	179.585	113.841	80.439	2.247	2.039	2.157	2.04	1.999		179.585	121.914	0.961183
BABPAY	83.19	84.015	117.209	97.238	96.198	121.699	82.582	179.363	117.016	96.799	2.082	2.04	1.779	2.062	2.064		179.363	121.699	0.961067
CUFLOF	98.922	101.671	79.3	116.641	113.174	79.627	178.184	100.812	120.52	79.749	2.364	2.082	2.079	2.072	2.247		178.184	120.52	0.961067
FAKTAP	98.773	175.609	110.428	117.955	77.32	76.53	106.755	103.339	77.204	116.909	2.317	2.02	2.055	2.27	2.051		175.609	117.955	0.9609
VEYDIO	79.401	79.283	96.217	115.994	116.422	103.308	175.601	80.002	117.954	101.761	2.806	2.146	2.15	2.155	1.889		175.601	117.954	0.960783
XIGYET	89.347	91	119.179	91	89.347	119.179	89.645	179.29	121.643	89.645	1.976	1.952	1.976	1.952	1.955		179.29	121.643	0.960783
WAVVOF	86.382	119.8	85.147	177.443	93.233	119.547	118.618	94.611	84.232	96.421	2.257	2.178	2.3	2.26	2.252		177.443	119.8	0.960717
BODHIN	119.518	81.969	98.91	117.192	81.666	177.157	95.216	117.504	82.208	100.06	2.136	2.143	2.117	2.179	2.022		177.157	119.518	0.96065
OFAJEM	87.744	91.12	90.686	120.793	118.641	89.675	178.43	91.245	120.567	89.561	2.26	1.779	1.787	1.787	2.689		178.43	120.793	0.960617
ADAMOJ03	108.696	112.919	174.056	99.139	116.422	76.054	75.902	113.13	104.94	75.349	2.044	2.005	2.08	2.061	2.39		174.056	116.422	0.960567
COPLUO	87.041	84.561	92.656	121.93	117.372	95.313	179.564	84.318	118.722	96.109	2.471	1.794	1.804	1.792	1.805		179.564	121.93	0.960567
CONCAK	101.385	99.535	80.085	111.454	118.303	79.182	178.43	100.07	120.798	79.827	2.356	2.079	2.068	2.089	2.243		178.43	120.798	0.960533
JAMGEK	77.375	78.188	110.024	104.65	101.114	120.321	77.82	177.934	116.581	100.975	2.207	1.927	1.789	1.94	1.936		177.934	120.321	0.960217
SBPCOB	88.129	86.499	92.759	117.658	120.529	92.527	178.929	88.419	121.321	91.697	2.594	1.725	1.742	1.753	2.216		178.929	121.321	0.960133
BABPAY	177.957	83.317	94.918	98.096	120.353	115.812	83.327	81.898	98.414	119.233	2.087	1.764	2.077	2.066	2.067		177.957	120.353	0.960067
ROFKAA	93.259	120.143	86.763	178.587	88.41	120.985	118.858	88.111	91.195	92.277	2.224	1.735	2.305	2.191	2.125		178.587	120.985	0.960033
OZUGAT	118.969	84.871	116.634	96.053	179.537	85.045	121.937	94.825	84.401	94.826	2.421	2.438	1.969	1.931	2.432		179.537	121.937	0.96
COPLIC	83.896	84.387	95.321	121.298	117.528	96.669	178.898	83.282	117.771	96.485	2.381	1.791	1.778	1.792	1.814		178.898	121.298	0.96
YUKYIM	119.913	87.198	119.974	89.613	177.573	89.173	119.913	95.229	89.173	89.613	1.915	2.031	2.085	2.173	2.031		177.573	119.974	0.959983
ORUVUT	179.081	92.399	86.738	86.85	121.484	118.791	93.893	93.427	86.71	118.779	1.989	1.938	2.01	2.02	2.011		179.081	121.484	0.95995
YOZRAG	118.809	118.809	89.545	90.445	89.545	90.445	90.011	90.011	122.383	179.979	2.283	2.264	2.371	2.264	2.371		179.979	122.383	0.959933
TUMCOV	107.252	98.243	77.11	113.235	115.029	76.366	174.318	103.915	116.728	77.157	2.076	2.11	2.117	2.108	2.267		174.318	116.728	0.959833
YOXTIP	178.578	92.632	86.188	86.043	118.649	118.986	93.947	95.093	86.068	120.99	1.95	2.015	2.083	2.116	2.101		178.578	120.99	0.9598
PIPQAG	91.445	85.781	89.836	120.284	118.173	93.897	178.659	85.844	121.072	93.168	1.965	1.787	1.781	1.792	1.799		178.659	121.072	0.959783
CUNSEL	97.551	118.065	97.696	177.101	82.404	119.515	118.064	85.282	95.674	81.442	2.184	1.822	2.258	2.212	2.241		177.101	119.515	0.959767
WUBREQ	98.442	111.132	178.522	101.403	119.373	79.826	80.701	120.941	99.41	80.074	2.011	2.03	2.043	2.042	2.219		178.522	120.941	0.959683
FOBWAU	120.574	86.326	90.308	118.992	92.211	178.153	91.931	120.432	91.103	88.145	2.192	1.795	1.8	1.806	1.81		178.153	120.574	0.95965
OFAJEM	91.207	87.873	89.582	118.659	120.877	90.58	178.453	91.16	120.464	89.63	2.259	1.787	1.784	1.779	2.689		178.453	120.877	0.9596
YEPFAA	175.638	77.8	103.313	97.323	118.064	115.612	77.782	78.42	105.266	113.701	2.328	2.215	2.131	2.149	2.127		175.638	118.064	0.959567
ZIDSUA	173.02	76.292	99.961	107.415	109.396	115.456	73.207	74.952	108.535	115.203	2.488	2.048	2.06	2.084	2.085		173.02	115.456	0.9594
YUDYEC	88.385	89.562	90.767	120.561	121.427	91.323	178.989	90.59	117.992	89.367	1.894	1.804	1.803	1.813	1.788		178.989	121.427	0.959367
RINCAU	122.114	179.676	97.415	93.381	58.47	58.036	122.114	121.206	58.036	93.381	2.229	2.475	2.452	2.625	2.475		179.676	122.114	0.959367
YOJMUF	179.46	87.569	93.009	90.204	121.78	116.057	87.44	89.812	91.964	121.902	2.413	1.774	1.788	1.787	1.778		179.46	121.902	0.9593
CAFSAF	102.795	118.172	99.807	176.975	79.121	113.021	119.418	79.683	98.104	80.301	2.044	2.078	2.204	2.072	2.046		176.975	119.418	0.959283
XESZAY	177.47	81.966	100.236	96.737	117.443	119.917	82.185	81.456	97.368	116.744	2.377	2.246	2.32	2.318	2.319		177.47	119.917	0.959217
QASGUM	99.754	103.364	78.503	109.079	120.099	78.911	177.652	100.625	119.457	78.571	1.813	2.081	2.061	2.03	2.271		177.652	120.099	0.959217
UJIMUV	89.271	121.062	91.543	178.612	88.437	120.733	118.194	91.74	90.226	88.817	2.202	2.134	2.154	2.212	2.199		178.612	121.062	0.959167
XEMDOI	179.417	80.058	98.462	98.472	121.87	111.24	81.874	80.946	100.246	119.566	2.033	2.031	2.057	2.059	2.099		179.417	121.87	0.959117
RINBUN	58.203	58.656	122.008	97.752	93.559	120.887	179.544	58.203	93.559	122.008	2.624	2.484	2.484	2.458	2.278		179.544	122.008	0.958933
KAKQUK	91.63	89.13	90.438	119.612	120.324	89.346	177.857	90.046	120.057	89.422	2.631	1.779	1.768	1.767	2.626		177.857	120.324	0.958883
WIBTUW	97.405	101.551	80.423	119.621	115.362	81.132	177.151	98.787	117.459	80.799	2.355	2.05	2.076	2.064	2.265		177.151	119.621	0.958833
ADAMOJ08	108.604	113.036	173.526	98.505	115.999	75.789	75.8	113.052	106.096	75.223	2.042	2.021	2.076	2.071	2.389		173.526	115.999	0.958783
XIPMIS	178.231	101.213	81.06	81.021	115.723	116.07	97.461	98.971	80.346	120.705	1.791	2.441	2.347	2.349	2.34		178.231	120.705	0.958767
WIBTOS	90	90.794	88.475	90	90.794	89.981	120.931	118.114	178.456	120.931	2.583	2.419	2.583	2.414	2.571		178.456	120.931	0.95875
RINBUN	121.994	179.518	93.454	98.002	58.227	58.65	120.868	121.994	58.227	93.454	2.27	2.481	2.481	2.623	2.457		179.518	121.994	0.958733
VARDIB	85.569	119.414	178.133	85.751	120.612	92.458	95.172	118.281	85.687	95.388	2.44	1.868	2.376	2.41	1.943		178.133	120.612	0.958683
ZIHRUG	94.333	120.202	96.297	178.219	85.662	120.698	117.343	86.028	92.653	85.073	2.224	1.877	2.221	2.239	2.242		178.219	120.698	0.958683
ZIHRUG10	94.333	120.202	96.297	178.219	85.662	120.698	117.343	86.028	92.653	85.073	2.224	1.877	2.221	2.239	2.242		178.219	120.698	0.958683
GIVFUM	84.882	86.152	120.118	93.986	96.21	118.805	83.326	177.638	118.621	95.479	2.315	1.782	1.679	1.775	1.812		177.638	120.118	0.958667
NERYUE	92.955	121.213	94.628	178.732	86.419	118.715	118.663	85.778	94.281	85.954	2.283	2.154	2.154	2.3	2.286		178.732	121.213	0.95865
FOKYOT01	85.842	84.747	92.165	120.152	118.243	95.208	177.667	85.55	119.681	96.51	2.602	1.773	1.785	1.802	1.802		177.667	120.152	0.958583
NERYUE01	92.959	121.218	94.624	178.732	86.432	118.715	118.662	85.773	94.268	85.958	2.283	2.154	2.154	2.301	2.285		178.732	121.218	0.958567
EDIDEC	98.598	119.512	177.836	97.264	120.323	81.459	80.903	113.164	100.59	81.041	2.076	1.919	2.08	2.057	2.019		177.836	120.323	0.95855
PEZYAU	89.505	177.517	120.004	119.23	95.308	96.516	81.073	86.415	91.207	119.064	2.588	1.788	1.752	1.722	1.723		177.517	120.004	0.95855
ASIJAN	82.747	176.313	118.807	116.708	98.404	98.468	78.215	84.674	97.588	118.55	2.458	1.96	1.951	1.957	1.966		176.313	118.807	0.958433
KAPMIZ	82.84	81.745	121.815	97.798	98.181	118.177	82.336	179.32	114.716	97.116	2.446	1.916	1.96	1.915	1.972		179.32	121.815	0.958417
ZESYUR	85.701	81.055	95.313	116.385	120.245	96.732	177.781	85.805	120.282	95.492	2.611	1.777	1.775	1.782	1.835		177.781	120.282	0.958317
VAKPUS	86.73	87.689	92.251	121.424	118.702	92.504	178.922	87.029	119.135	93.806	2.507	1.781	1.777	1.796	1.786		178.922	121.424	0.9583
QEYYAU	80.89	100.767	98.964	118.944	117.349	79.03	179.644	100.983	122.148	79.373	1.995	1.898	1.967	1.97	1.902		179.644	122.148	0.958267
LIDNIW	121.949	95.503	116.236	86.333	179.431	94.771	119.924	85.062	93.417	84.885	2.423	2.365	1.897	1.916	2.464		179.431	121.949	0.958033
VEYGAJ	178.508	83.762	97.12	95.424	121.026	116.319	84.31	83.483	95.959	119.248	2.597	2.446	2.155	2.126	2.122		178.508	121.026	0.958033
GABYEO	175.466	74.016	102.581	110.57	104.337	117.985	73.645	73.594	106.119	114.935	2.54	2.016	2.028	2.032	2.052		175.466	117.985	0.958017
TAFVIF	85.585	85.787	120.208	94.296	95.499	116.492	83.709	178.557	121.077	95.12	2.532	1.797	1.814	1.815	1.822		178.557	121.077	0.958
AZALAQ	99.148	99.688	80.636	112.353	118.746	81.026	179.25	97.878	121.771	81.556	2.303	2.264	2.263	2.261	2.055		179.25	121.771	0.957983
PUCJUT	175.924	81.243	96.808	99.322	115.191	118.446	80.011	80.11	102.584	118.27	2.239	2.156	2.099	2.078	2.105		175.924	118.446	0.957967
AEZNPB	97.701	102.148	78.698	118.92	113.332	79.556	176.396	103.037	117.226	79.013	2.308	2.064	2.062	2.067	2.325		176.396	118.92	0.957933
POCANC	89.765	121.018	88.497	178.491	89.13	120.906	118.076	90.957	91.633	89.995	2.13	2.128	2.122	2.123	2.135		178.491	121.018	0.957883
ECEKIG	80.953	76.662	114.398	101.721	103.552	119.377	77.328	176.848	114.107	99.95	2.343	1.955	2.053	2.095	2.071		176.848	119.377	0.95785
ENUPAF	176.733	103.355	77.026	76.772	119.264	117.278	100.162	105.843	76.722	108.279	2.296	2.29	2.029	2.034	2.072		176.733	119.264	0.957817
ZIHRUD	95.919	118.308	92.994	177.937	85.951	119.365	120.483	85.506	94.663	84.993	2.237	1.949	2.215	2.227	2.235		177.937	120.483	0.957567
DASPUJ	115.458	120.688	97.374	82.404	81.953	96.554	100.074	81.667	118.139	178.14	1.964	2.094	2.226	2.105	2.034		178.14	120.688	0.957533
FIKFOX	80.455	85.902	96.832	119.834	116.923	95.33	177.281	83.813	119.283	97.753	2.515	1.791	1.761	1.775	1.743		177.281	119.834	0.95745
UDAHEM	84.536	95.723	84.808	85.7	94.095	95.155	113.722	121.759	179.73	122.286	2.406	1.891	2.374	1.953	2.4		179.73	122.286	0.9574
UFEPUS	83.536	120.131	178.128	89.076	118.666	91.518	95.138	120.684	90.292	90.473	1.902	2.034	1.9	1.906	1.95		178.128	120.684	0.9574
IYAMOL	60.464	83.313	60.58	89.607	178.422	94.109	120.988	97.64	89.775	84.322	2.79	2.796	1.912	1.906	2.761		178.422	120.988	0.957233
IFPPAU	57.433	180	93.748	93.748	122.567	122.567	57.433	57.433	122.567	93.748	2.598	2.939	2.939	2.211	2.939		180	122.567	0.957217
VOKTOG	105.768	110.629	69.475	117.607	101.244	70.427	175.035	112.581	108.938	71.567	2.415	2.294	2.262	2.245	2.568		175.035	117.607	0.957133
ZIHRUD10	95.957	118.286	93.024	177.945	85.909	119.335	120.519	85.5	94.653	84.982	2.236	1.948	2.215	2.228	2.234		177.945	120.519	0.9571
KAJTOE	90.215	90.668	89.139	90.668	90.215	89.139	120.857	118.285	178.279	120.857	2.2	2.109	2.2	2.109	2.202		178.279	120.857	0.957033
XOQZEJ	100.885	101.137	80.58	118.458	113.456	80.202	177.063	97.125	119.641	79.938	2.043	2.087	2.094	2.066	2.27		177.063	119.641	0.957033
RCOHPH02	82.683	120.899	78.526	178.318	97.428	116.619	115.396	96.36	81.921	103.145	2.334	1.569	1.896	2.341	2.317		178.318	120.899	0.956983
WUVMUW	102.186	116.199	100.377	177.216	79.59	119.802	114.832	80.259	98.056	79.649	2.337	2.054	2.316	2.319	2.361		177.216	119.802	0.9569
ZIHRUG	94.366	120.269	96.391	178.011	85.79	120.602	117.355	85.471	92.59	85.435	2.226	1.889	2.226	2.241	2.242		178.011	120.602	0.956817
ZIHRUG10	94.366	120.269	96.391	178.011	85.79	120.602	117.355	85.471	92.59	85.435	2.226	1.889	2.226	2.241	2.242		178.011	120.602	0.956817
HUBVUW	92.664	94.092	85.93	121.155	117.801	86.347	178.56	94.277	119.826	86.724	2.972	2.164	2.156	2.152	2.411		178.56	121.155	0.95675
RITWOH	102.502	100.372	77.882	111.084	120.231	77.405	177.635	104.456	115.15	77.484	2.276	2.07	2.045	2.07	2.184		177.635	120.231	0.956733
UDAHEM	85.344	120.646	178.049	85.024	120.309	93.492	94.373	116.899	85.005	96.817	2.392	1.887	2.382	2.396	1.949		178.049	120.646	0.956717
GAYNAV	86.026	121.389	92.834	178.791	93.743	119.692	118.658	95.051	86.155	86.169	2.255	2.043	2.041	2.245	2.246		178.791	121.389	0.9567
GOVCUP	178.917	89.396	91.016	89.407	121.516	119.436	89.814	89.583	90.802	119.034	2.491	1.768	1.783	1.768	1.772		178.917	121.516	0.956683
YIQLUF	89.997	121.673	92.208	179.073	93.355	118.11	120.216	89.795	87.523	87.118	2.429	2.109	2.1	1.858	1.835		179.073	121.673	0.956667
KUGXOB	119.611	120.563	97.833	80.37	96.823	83.203	83.745	97.969	119.533	177.961	2.154	2.103	1.977	2.169	2.009		177.961	120.563	0.956633
ILIYAD	82.446	121.978	82.268	179.372	97.555	116.189	116.537	98.167	82.213	97.324	1.842	2.295	1.777	1.846	1.86		179.372	121.978	0.956567
HIGWIF	69.847	70.85	112.038	107.863	112.365	114.823	172.216	69.393	106.612	103.035	2.438	2.314	2.31	2.327	2.558		172.216	114.823	0.95655
HUBVEG	86.511	86.379	94.332	119.145	117.981	92.655	178.957	85.69	121.567	94.425	2.628	2.133	2.131	2.129	2.445		178.957	121.567	0.9565
FAJNOW	176.222	82.613	106.995	98.749	113.969	118.833	70.016	84.769	97.125	116.427	2.393	2.358	2.242	2.259	2.06		176.222	118.833	0.956483
ADAMOJ	102.94	111.147	179.283	101.91	112.825	77.383	77.049	121.894	103.268	77.526	2.057	1.982	2.065	2.064	2.382		179.283	121.894	0.956483
IMUXUL	177.315	119.635	63.853	60.335	97.646	100.962	113.73	119.929	62.572	101.61	2.495	2.51	2.752	2.787	2.689		177.315	119.929	0.956433
LOBXIL	83.509	119.612	85.229	176.997	91.913	119.02	118.76	98.399	85.122	95.827	2.434	1.881	1.918	2.381	2.412		176.997	119.612	0.956417
RAWNUY	178.215	85.435	92.791	95.528	119.517	120.833	85.959	86.189	94.125	118.1	2.168	1.78	2.245	2.253	2.26		178.215	120.833	0.956367
FOJBOV04	90.397	121.44	178.818	90.22	121.44	89.409	90.22	117.12	89.409	90.397	1.813	1.819	1.813	1.81	1.819		178.818	121.44	0.9563
LINTEI	85.358	84.07	95.758	118.826	117.237	96.631	178.118	82.642	120.74	95.488	2.556	1.796	1.79	1.784	1.798		178.118	120.74	0.9563
XALJOJ	86.571	88.2	91.301	119.999	119.785	94.185	177.375	85.673	119.296	94.076	2.551	1.781	1.793	1.76	1.767		177.375	119.999	0.956267
ELALUZ	107.081	105.238	75.179	111.53	119.081	76.103	176.457	100.74	111.673	75.802	2.261	2.012	2.03	2.02	2.381		176.457	119.081	0.956267
NEPTEJ	101.633	95.089	82.059	117.985	116.62	83.201	176.302	98.765	118.929	79.162	1.907	2.255	2.256	2.321	1.399		176.302	118.929	0.956217
FOJBOV05	90.395	121.458	178.828	90.216	121.458	89.414	90.216	117.083	89.414	90.395	1.812	1.819	1.812	1.808	1.819		178.828	121.458	0.956167
PPHCHN11	84.853	116.072	85.905	177.44	99.577	119.407	120.071	95.535	78.005	96.067	2.192	1.402	1.804	2.175	2.2		177.44	120.071	0.95615
HUSWAV	69.339	62.66	115.366	111.066	103.99	110.291	172.733	69.089	102.434	112.594	2.762	2.299	2.314	2.718	2.554		172.733	115.366	0.956117
WIDHOJ	93.481	93.703	86.087	121.997	118.48	86.083	179.354	94.138	118.235	86.499	2.283	2.033	2.028	2.039	1.942		179.354	121.997	0.95595
WACVII	100.188	105.025	77.25	116.046	120.005	76.587	177.356	103.791	108.971	76.947	2.324	1.989	2.037	2.035	2.32		177.356	120.005	0.95585
XEKPEI	101.654	116.346	99.809	175.798	80.114	118.452	114.868	81.308	101.023	76.163	1.979	1.88	2.31	1.952	1.981		175.798	118.452	0.955767
HIBXUN	97.664	177.402	116.952	119.537	83.515	84.186	97.105	93.887	83.71	120.058	1.849	2.292	2.267	2.192	2.289		177.402	120.058	0.955733
COPLUO	84.338	84.895	94.397	119.613	120.717	94.41	178.059	86.514	117.643	95.395	2.474	1.79	1.783	1.807	1.812		178.059	120.717	0.9557
LEVHEZ	179.528	74.207	102.927	107.881	122.188	104.985	77.247	71.65	106.146	111.007	2.266	2.086	2.733	2.682	2.707		179.528	122.188	0.955667
KOCRUP	83.065	178.409	116.866	118.497	96.363	95.532	83.026	84.973	97.024	121.07	2.367	1.79	1.81	1.817	1.808		178.409	121.07	0.95565
BOCRAN	96.427	118.321	94.157	177.357	84.476	120.02	119.751	85.824	93.22	85.899	2.241	1.944	2.223	2.249	2.233		177.357	120.02	0.955617
WAGRAZ	90.372	118.696	90.411	178.879	90.569	121.545	119.759	90.667	89.3	88.709	1.775	2.201	2.205	1.784	1.775		178.879	121.545	0.955567
XACZAD	94.755	94.47	84.896	118.921	120.914	84.187	178.248	96.447	117.698	85.217	1.954	2.157	2.136	2.161	2.03		178.248	120.914	0.955567
SIDDEO	95.804	118.883	94.612	178.263	84.131	120.931	117.007	84.171	97.385	83.865	2.345	2.296	2.179	2.379	2.381		178.263	120.931	0.955533
SIDDEO10	95.804	118.883	94.612	178.263	84.131	120.931	117.007	84.171	97.385	83.865	2.345	2.296	2.179	2.379	2.381		178.263	120.931	0.955533
BACYAI	98.612	97.163	81.131	119.473	119.169	80.081	176.802	101.672	113.823	81.161	2.133	2.03	2.014	2.038	2.246		176.802	119.473	0.955483
FPICOB	90.28	89.378	90.323	89.378	90.28	90.323	122.034	115.933	179.354	122.034	1.863	2.139	1.863	2.139	1.82		179.354	122.034	0.955333
GOFYAC	177.591	98.34	83.467	83.7	120.275	117.422	97.027	94.006	83.486	118.57	2.018	2.118	1.869	1.867	1.868		177.591	120.275	0.955267
QENZAK	177.659	101.846	78.99	78.978	120.346	110.241	99.3	103.276	77.371	117.642	2.258	2.247	2.014	2.032	2.011		177.659	120.346	0.955217
PSNPEA10	179.26	93.561	85.378	84.672	120.342	121.948	95.11	94.612	86.646	115.948	2.539	2.168	2.302	2.288	2.274		179.26	121.948	0.9552
LOBXIL	84.655	116.577	85.368	178.803	95.544	119.731	121.491	94.161	85.153	95.116	2.392	1.89	1.954	2.405	2.388		178.803	121.491	0.9552
MONLOR	98.11	108.348	77.139	117.371	113.418	76.037	174.683	103.376	113.952	77.078	2.301	1.998	2.057	2.063	2.263		174.683	117.371	0.9552
ODUKOP	89.236	87.725	92.028	119.568	121.427	91.688	178.736	88.387	118.785	90.965	2.283	2.021	2.031	2.023	2.078		178.736	121.427	0.95515
YEPDUS	176.611	80.214	101.062	102.943	119.302	115.008	80.171	79.163	96.417	116.557	2.254	2.151	2.085	2.061	2.073		176.611	119.302	0.95515
GOWFIH	101.281	99.258	82.731	118.563	117.305	79.645	175.869	97.285	116.496	79.808	1.86	2.05	2.093	2.129	2.037		175.869	118.563	0.9551
IFOGIV	81.809	82.072	101.688	119.071	117.154	95.354	176.376	82.194	118.095	96.798	2.661	2.136	2.132	2.137	1.972		176.376	119.071	0.955083
QOHTIQ	178.807	87.302	92.023	93.093	118.889	118.791	87.211	86.532	93.869	121.511	1.896	2.338	2.319	2.319	2.323		178.807	121.511	0.954933
KUBWIP	177.526	80.594	99.856	96.205	120.232	114.281	80.997	81.36	101.089	118.255	2.222	1.987	2.088	2.115	2.113		177.526	120.232	0.9549
VOGNEK	178.535	82.761	95.868	96.393	118.645	121.241	83.876	85.003	96.159	116.726	2.704	1.783	1.784	1.754	1.761		178.535	121.241	0.9549
OFIVIK	100.328	178.985	118.912	121.692	79.965	79.755	100.939	99.083	79.927	110.286	2.242	2.051	2.066	2.136	2.061		178.985	121.692	0.954883
PAFGEJ	179.838	85.196	94.062	94.443	122.548	119.791	85.895	85.436	94.961	115.831	2.002	1.982	2.134	2.131	2.14		179.838	122.548	0.954833
SEGYOV	106.764	103.335	75.827	109.146	119.888	76.38	177.172	102.665	113.468	75.223	2.297	2.024	2.048	2.033	2.332		177.172	119.888	0.954733
ELALOT	109.006	107.836	73.398	110.849	117.915	74.758	175.198	101.359	109.305	73.844	2.256	2.028	2.041	2.023	2.476		175.198	117.915	0.954717
SIYSIC	173.757	73.813	106.468	103.868	116.475	110.937	79.771	72.803	103.632	114.095	2.331	1.772	1.776	1.774	1.773		173.757	116.475	0.9547
SIVVAV	84.997	118.767	84.643	177.957	93.03	118.438	120.675	94.085	85.826	97.392	2.225	2.217	2.299	2.219	2.223		177.957	120.675	0.9547
WUPWOU	177.187	78.862	97.806	102.461	119.908	117.599	80.492	80.298	100.065	113.386	2.043	1.995	2.057	2.09	2.062		177.187	119.908	0.95465
PEVJEI	178.044	85.591	95.195	93.054	120.699	116.688	85.872	84.991	95.376	120.766	2.13	1.817	2.161	2.16	2.154		178.044	120.766	0.954633
BAHXOX	178.367	91.06	88.659	89.323	121.092	119.079	91.756	91.843	87.358	119.611	2.444	2.081	2.111	2.159	2.134		178.367	121.092	0.954583
BOCQUF	179.584	88.224	91.305	92.181	120.931	116.435	88.434	87.687	92.181	122.31	2.713	1.817	2.302	2.313	2.309		179.584	122.31	0.954567
DAJJUW	178.311	98.707	80.964	81.215	111.604	119.706	100.653	98.293	80.011	121.037	2.029	2.575	1.998	2.037	2.004		178.311	121.037	0.954567
UHONOU	179.515	84.466	97.301	95.741	116.037	122.241	82.609	84.718	95.186	118.382	2.284	1.833	1.801	1.77	1.795		179.515	122.241	0.954567
HIGWIF	89.699	88.562	91.277	120.139	120.388	89.106	177.66	90.09	119.446	91.259	2.438	1.941	1.926	1.944	1.877		177.66	120.388	0.954533
RITWOH01	102.695	177.539	110.538	115.668	77.504	77.257	104.564	100.092	78.037	120.269	2.282	2.07	2.06	2.196	2.051		177.539	120.269	0.9545
BAHXOX10	178.368	91.067	88.672	89.34	121.099	119.076	91.732	91.834	87.355	119.609	2.444	2.081	2.111	2.159	2.134		178.368	121.099	0.954483
NECZEA	175.548	97.738	80.916	81.058	117.928	116.617	103.404	95.804	81.08	118.281	2.166	2.171	1.981	1.977	1.975		175.548	118.281	0.95445
LADDOJ	87.876	121.009	88.662	178.759	91.225	117.344	121.498	90.919	89.649	91.719	1.758	2.296	1.773	1.777	1.78		178.759	121.498	0.95435
WEMCAV	116.594	81.096	100.962	111.93	77.534	177.654	101.23	120.396	77.613	101.405	1.98	2.015	2.023	2.287	2.009		177.654	120.396	0.9543
JIJGAK	82.665	82.806	119.184	99.393	96.423	120.691	81	177.937	114.591	97.8	2.621	1.687	1.774	1.753	1.694		177.937	120.691	0.9541
JOBHAL	87.498	118.776	87.285	177.497	93.238	120.251	119.814	94.509	84.477	93.001	1.913	2.338	2.085	1.931	1.945		177.497	120.251	0.9541
ZUGYIJ	177.824	82.995	95.824	92.424	120.58	117.258	85.653	88.191	94.9	120.443	2.237	1.786	1.776	1.787	1.772		177.824	120.58	0.954067
OKAYAA	178.377	97.227	80.998	81.353	116.227	115.93	98.494	100.211	81.647	121.135	2.073	2.288	1.884	1.87	1.885		178.377	121.135	0.954033
LERCEQ	85.432	86.065	97.236	118.678	119.656	92.703	177.328	85.953	120.086	92.609	2.011	2.125	2.143	2.151	1.746		177.328	120.086	0.954033
XIPMUE	178.377	95.511	86.824	85.076	118.889	118.396	91.591	95.459	85.556	121.136	2.085	2.041	2.271	2.304	2.292		178.377	121.136	0.954017
CEHZEV	101.905	120.068	177.306	76.712	120.068	91.347	76.712	119.864	91.347	101.905	2.428	2.275	2.428	2.201	2.275		177.306	120.068	0.953967
FUYNAO01	177.668	80.987	97.63	98.692	116.443	120.431	81.576	83.609	97.591	117.461	2.513	1.813	1.804	1.8	1.8		177.668	120.431	0.95395
XADXAB	91.988	119.303	94.465	178.04	86.024	118.607	120.804	86.053	94.891	86.604	2.285	2.157	2.154	2.308	2.294		178.04	120.804	0.953933
LEBQAN	100.499	116.186	96.563	177.805	81.077	120.57	116.578	81.411	98.957	81.572	2.403	1.775	2.321	2.386	2.378		177.805	120.57	0.953917
ISAHER	179.107	88.79	89.508	92.131	117.484	120.601	90.999	88.225	90.319	121.877	2.318	1.777	1.794	1.792	1.807		179.107	121.877	0.953833
CEVTEC	121.256	89.063	117.485	90.523	178.486	90.262	121.256	89.424	90.262	90.523	2.606	2.635	2.441	2.426	2.635		178.486	121.256	0.953833
CEVTEC10	121.256	89.063	117.485	90.523	178.486	90.262	121.256	89.424	90.262	90.523	2.606	2.635	2.441	2.426	2.635		178.486	121.256	0.953833
FOJYOS	82.358	86.668	96.364	116.361	121.167	94.823	178.394	84.834	119.893	94.89	2.767	1.767	1.763	1.75	1.771		178.394	121.167	0.953783
SOPROE	90.022	90.667	90.85	120.233	121.435	88.022	178.658	90.123	118.325	90.319	2.209	1.786	1.798	1.786	1.802		178.658	121.435	0.953717
MEBDOM	93.239	120.698	95.454	177.92	87.459	120.525	117.755	85.811	91.443	86.625	2.256	2.139	2.37	2.257	2.248		177.92	120.698	0.9537
ZOJMIU	114.691	90.386	122.644	89.689	179.862	90.68	122.644	89.689	90.386	89.182	2.551	2.551	2.348	2.322	2.532		179.862	122.644	0.953633
IXAFUJ	92.294	86.129	92.147	96.64	83.183	89.555	120.899	117.294	178.113	120.585	1.742	2.204	2.189	2.014	1.749		178.113	120.899	0.953567
AMEROA	82.209	97.493	81.351	83.766	99.073	96.155	119.673	118.153	176.882	117.052	1.851	2.361	1.814	1.77	1.861		176.882	119.673	0.953483
XUDJEL	90.092	91.383	89.854	122.292	117.41	89.074	179.5	89.223	120.294	90.385	2.123	1.836	1.758	1.764	2.129		179.5	122.292	0.953467
CEMXIC	107.363	103.204	72.973	106.854	110.681	72.029	174.366	111.562	117.161	73.375	2.263	2.027	2.023	2.021	2.568		174.366	117.161	0.953417
JELHUG	177.039	84.233	98.003	97.775	119.834	114.659	80.165	81.217	98.666	119.583	2.093	1.773	2.063	2.057	2.064		177.039	119.834	0.953417
FOKTOQ01	92.197	121.001	92.46	178.203	89.687	118.577	120.139	86.119	90.646	88.931	2.52	2.048	2.011	2.445	2.497		178.203	121.001	0.953367
ZEQRES	177.508	97.118	85.539	84.762	120.313	118.954	92.298	95.21	85.027	118.574	1.963	2.018	2.087	2.085	2.053		177.508	120.313	0.95325
RITWOH02	102.622	104.464	115.609	78.032	77.435	120.317	100.105	177.511	110.657	77.484	2.285	2.069	2.201	2.056	2.06		177.511	120.317	0.953233
EQEZAC	97.696	122.262	98.661	179.454	82.084	110.762	121.339	82.398	97.419	81.736	2.028	1.922	2.028	2.054	2.078		179.454	122.262	0.9532
AWISII	82.435	84.954	94.372	119.505	118.792	95.859	176.695	83.916	118.211	98.452	2.517	1.766	1.779	1.787	1.733		176.695	119.505	0.953167
MEJZOT	178.277	96.303	83.655	83.054	120.314	121.087	95.171	98.592	83.258	114.59	1.746	2.752	1.769	1.771	1.757		178.277	121.087	0.953167
IXUCIP	103.631	178.227	116.029	110.01	77.668	78.002	100.568	102.312	77.995	121.041	1.996	2.062	2.051	2.198	2.061		178.227	121.041	0.9531
ZEVSAX	100.771	174.284	115.81	117.1	76.88	81.446	104.17	99.448	77.373	115.557	2.288	2.386	2.396	2.384	2.293		174.284	117.1	0.953067
VOKVEY	105.679	110.582	69.486	117.726	101.148	70.359	174.905	112.617	109.016	71.725	2.418	2.288	2.259	2.246	2.572		174.905	117.726	0.952983
PUPVEC	100.216	113.364	97.043	176.359	80.187	119.183	118.55	80.057	102.94	79.71	2.142	2.084	2.292	2.117	2.115		176.359	119.183	0.952933
GIHWOK01	98.761	97.248	121.29	82.405	81.285	112.69	99.659	178.46	119.452	80.528	2.24	2.043	2.054	2.062	2.053		178.46	121.29	0.952833
ODUROU	80.948	112.923	177.398	79.286	120.235	97.96	100.904	117.833	79.594	101.319	1.961	2.241	2.05	2.071	1.987		177.398	120.235	0.952717
BADLIC	89.192	88.012	90.672	119.821	119.782	89.955	177.558	92.579	120.397	89.605	2.222	1.787	1.796	1.785	1.786		177.558	120.397	0.952683
TOVDUD	84.496	88.825	117.841	94.088	92.054	119.751	86.728	178.575	121.419	93.805	2.538	1.766	1.771	1.766	1.776		178.575	121.419	0.9526
NIZLIT	177.734	86.254	94.357	93.169	120.105	120.585	84.601	89.096	92.562	118.289	2.365	1.766	1.775	1.786	1.78		177.734	120.585	0.952483
FIFXAW	97.781	53.178	168.025	100.888	110.885	97.939	93.972	57.716	87.344	87.321	2.996	2.284	2.939	3.104	2.289		168.025	110.885	0.952333
ONUFUA	177.119	96.249	80.954	81.374	117.131	116.015	101.554	98.461	81.315	119.98	2.475	2.212	1.893	1.875	1.88		177.119	119.98	0.952317
PIHVUX	93.635	120.912	94.068	178.049	85.342	119.508	118.408	86.149	93.115	87.736	2.132	1.88	1.99	2.136	2.148		178.049	120.912	0.952283
PIHVUX10	93.635	120.912	94.068	178.049	85.342	119.508	118.408	86.149	93.115	87.736	2.132	1.88	1.99	2.136	2.148		178.049	120.912	0.952283
CAJPUY	93.781	105.072	86.761	116.564	122.3	74.881	179.436	105.039	109.157	74.563	2.715	2.343	2.109	2.093	2.916		179.436	122.3	0.952267
UTOXOR	98.5	117.633	100.616	178.04	81.753	114.879	120.904	81.438	96.573	81.051	2.275	1.769	2.294	2.262	2.291		178.04	120.904	0.952267
ZAWQIX	84.43	81.761	97.915	114.63	120.455	96.511	177.579	80.766	119.607	98.734	2.971	1.76	1.759	1.792	1.755		177.579	120.455	0.952067
OQUMAQ	173.823	110.216	77.67	76.718	115.933	111.909	101.395	98.499	75.624	116.699	2.32	2.292	1.964	2.052	1.963		173.823	116.699	0.952067
XEMDOI	178.169	80.846	101.289	98.548	116.23	121.048	80.531	80.427	98.31	114.872	2.042	1.984	2.087	2.065	2.062		178.169	121.048	0.952017
DURHAB	119.359	118.415	176.476	113.947	56.519	63.309	62.092	115.906	116.911	62.999	2.948	2.326	2.778	2.825	2.651		176.476	119.359	0.95195
GACKEB	95.863	177.965	116.788	120.855	85.394	83.82	96.374	92.768	85.841	120.124	2.015	2.115	2.072	2.037	2.097		177.965	120.855	0.951833
YIGVUF	85.426	85.743	121.43	94.09	95.702	118.63	84.542	178.536	117.887	94.545	2.463	1.807	1.772	1.719	1.77		178.536	121.43	0.951767
MIGJOD	115.974	81.004	102.861	112.323	77.095	177.612	100.508	120.508	78.001	100.527	1.97	2.044	2.063	2.314	2.025		177.612	120.508	0.951733
MALWOL	95.416	116.727	93.831	177.484	84.739	120.1	120.381	84.521	97.516	84.051	2.29	1.782	2.257	2.306	2.306		177.484	120.381	0.951717
CEDWIR	84.948	175.848	116.809	117.102	98.472	99.641	78.892	79.003	99.16	118.745	2.679	1.707	1.782	1.782	1.783		175.848	118.745	0.951717
HAVSIJ	101.617	98.511	79.388	117.951	121.229	79.859	178.328	100.801	111.386	79.813	2.06	2.076	2.091	2.095	2.25		178.328	121.229	0.95165
YEZTOP	77.143	118.048	176.744	77.877	107.883	101.575	101.645	119.648	76.539	105.294	1.977	2.245	2.034	2.02	1.782		176.744	119.648	0.9516
JUDMUS	98.945	178.366	115.211	116.042	80.806	80.848	97.803	100.713	80.856	121.271	2.372	2.077	2.057	2.018	2.067		178.366	121.271	0.951583
MAWKOK	81.259	116.934	79.545	177.222	96.867	120.13	117.515	97.973	85.848	98.522	2.311	2.351	1.768	2.318	2.314		177.222	120.13	0.951533
LIXGEF	178.698	93.136	86.055	85.161	121.607	120.835	94.49	95.655	85.571	115.802	2.27	1.959	2.038	2.05	2.006		178.698	121.607	0.951517
LIPKIE	91.079	91.022	118.254	87.872	91.022	120.873	87.872	177.957	120.873	91.079	2.933	2.039	2.933	2.062	2.039		177.957	120.873	0.9514
REJMOK	178.238	91.355	89.283	87.06	119.578	121.157	91.713	91.186	89.372	119.083	2.18	2.106	1.869	1.855	1.864		178.238	121.157	0.95135
TOJTER	178.722	95.345	83.3	83.632	121.645	113.309	97.978	95.701	84.098	121.439	2.414	2.237	2.389	2.449	2.435		178.722	121.645	0.951283
VODCIA	94.298	97.328	84.343	117.407	120.944	84.597	178.019	95.743	118.613	83.633	1.95	2.036	2.069	2.074	2.057		178.019	120.944	0.95125
FUDVEH	121.948	82.555	117.633	94.657	179.015	81.353	116.552	97.111	86.302	97.99	2.019	1.988	1.933	1.991	2.03		179.015	121.948	0.951117
PEVHEG	96.828	96.492	81.837	117.63	116.237	82.556	177.623	100.462	120.556	81.908	2.214	2.385	2.402	2.354	2.173		177.623	120.556	0.951117
MXCPFE	90.647	89.295	90.782	90.622	88.287	90.385	118.304	120.011	178.704	121.643	1.802	1.979	1.82	1.773	1.801		178.704	121.643	0.951017
YIDSIQ	175.752	103.136	76.01	77.334	111.956	118.693	100.438	106.429	76.895	114.001	1.81	2.426	2.005	2.051	2.09		175.752	118.693	0.950983
HARWOM	96.649	95.225	84.446	119.011	115.87	84.209	178.904	96.192	121.849	83.227	1.949	2.131	2.148	2.181	2.074		178.904	121.849	0.950917
HARWOM10	96.649	95.225	84.446	119.011	115.87	84.209	178.904	96.192	121.849	83.227	1.949	2.131	2.148	2.181	2.074		178.904	121.849	0.950917
LUJQIS	179.002	76.402	104.359	99.987	121.949	118.823	76.343	80.453	102.615	105.787	2.33	1.982	2.146	2.04	2.033		179.002	121.949	0.950883
NOCPOM	90.475	120.773	93.771	177.824	87.279	119.052	119.502	87.353	93.957	87.184	2.283	2.036	2.113	2.292	2.295		177.824	120.773	0.95085
YAVCII	91.025	91.025	90.903	88.044	90.903	88.044	120.899	120.899	177.949	118.202	2.059	2.907	2.034	2.907	2.034		177.949	120.899	0.950833
AYUHEJ	99.701	96.373	80.111	114.205	118.736	80.811	176.561	101.685	119.516	81.46	2.288	2.291	2.288	2.278	2.064		176.561	119.516	0.95075
TISCED	87.252	121.762	86.604	178.806	87.253	120.449	117.603	92.749	91.731	94.45	1.878	2.192	2.197	1.868	1.881		178.806	121.762	0.950733
GOCDIN	98.836	97.259	82.231	112.919	121.708	81.633	178.75	99.062	119.12	81.078	1.94	2.054	2.054	2.038	2.019		178.75	121.708	0.9507
FECXUJ	179.063	98.079	80.681	82.058	115.93	115.716	98.442	98.709	82.039	122.022	1.802	2.204	1.962	1.96	1.982		179.063	122.022	0.950683
JIJGAK	84.157	80.703	120.09	98.26	98.923	120.435	81.493	177.47	113.885	96.601	2.601	1.741	1.739	1.714	1.688		177.47	120.435	0.950583
BACTUW	178.115	92.726	87.574	84.603	121.031	121.081	94.16	93.947	87.003	116.715	2.148	2.662	1.754	1.774	1.774		178.115	121.081	0.950567
CUFLUL	96.345	102.206	79.038	113.769	118.26	79.375	175.292	103.408	117.861	79.484	2.355	2.099	2.08	2.096	2.254		175.292	118.26	0.950533
KEBTAP	89.002	89.745	89.59	120.96	118.858	92.207	177.986	89.815	120.161	89.675	2.427	2.054	2.044	2.049	2.451		177.986	120.96	0.950433
NOQKIN	177.644	83.709	98.068	98.423	120.622	117.549	83.166	82.72	93.938	117.679	2.077	2.001	2.082	2.058	2.055		177.644	120.622	0.950367
DAHXOC	175.28	94.677	79.812	79.839	116.54	118.258	101.302	103.553	80.807	116.616	2.389	2.565	2.021	2.019	2.021		175.28	118.258	0.950367
GIMPIE	89.503	119.669	179.403	81.24	122.384	81.636	90.958	117.93	97.806	98.873	2.884	1.934	2.079	2.058	1.938		179.403	122.384	0.950317
EQEYUV	92.648	118.019	97.224	176.81	84.736	119.512	119.793	84.185	96.452	84.717	2.086	1.971	2.042	2.074	2.069		176.81	119.793	0.950283
GECWAM	83.413	84.254	97.831	117.005	121.691	94.827	178.706	84.5	118.133	95.228	2.867	1.724	1.752	1.763	1.762		178.706	121.691	0.95025
YUTTEN	95.441	114.682	176.038	101.201	118.536	80.649	80.6	119.025	101.287	80.719	2.002	2.045	2.033	2.046	2.206		176.038	119.025	0.950217
VEPWOC	91.499	89.686	122.365	88.804	89.686	118.818	88.804	179.372	118.818	91.499	2.444	1.8	2.444	1.788	1.8		179.372	122.365	0.950117
NOMFIF	59.801	57.176	119.911	113.292	84.655	122.385	179.388	60.11	86.105	120.411	2.65	2.881	2.857	2.909	2.275		179.388	122.385	0.95005
YOXWOZ	92.835	93.086	87.787	118.934	118.298	87.013	179.195	91.607	122.192	87.644	2.502	1.884	1.89	1.891	2.016		179.195	122.192	0.95005
WECDEN	93.216	93.9	86.947	122.511	117.631	85.614	179.508	94.64	118.469	85.661	2.364	2.06	2.071	2.075	2.065		179.508	122.511	0.94995
MOJSEK	90.015	89.095	90.389	118.417	122.365	90.274	179.359	90.203	119.214	90.042	2.353	1.836	1.811	1.826	2.355		179.359	122.365	0.9499
POGYOA	178.458	81.658	99.543	97.283	119.089	121.471	81.94	81.702	97.87	113.371	2.028	1.941	2.085	2.041	2.066		178.458	121.471	0.949783
FUWZAA	97.815	122.165	179.15	99.667	113.634	81.008	81.558	117.348	98.876	81.142	2.051	1.97	2.081	2.045	1.999		179.15	122.165	0.94975
FORYAM	85.358	85.004	96.289	120.871	119.333	95.42	177.855	84.984	117.644	92.982	2.327	1.804	1.741	1.793	1.8		177.855	120.871	0.949733
IJIWII	120.853	94.78	117.06	84.988	177.836	92.956	119.984	85.444	96.725	85.077	2.361	2.377	1.905	1.953	2.514		177.836	120.853	0.949717
HOFKOE	179.147	102.075	77.799	77.512	122.164	116.508	103.032	102.002	77.66	107.865	2.566	2.283	2.119	2.127	2.147		179.147	122.164	0.949717
ABEVUA	86.191	85.726	94.591	117.674	121.473	95.036	178.455	86.349	119.468	92.107	2.455	2.124	2.128	2.139	2.553		178.455	121.473	0.9497
UBOCOG	67.332	68.332	106.931	106.15	103.38	116.787	173.769	66.223	108.608	114.434	2.693	2.298	2.328	2.311	2.56		173.769	116.787	0.9497
NUHJAB	99.338	117.617	177.128	96.151	120.151	81.519	77.831	115.612	100.337	84.729	2.028	2.009	2.113	2.155	2.255		177.128	120.151	0.949617
AMOGIT	85.894	86.345	93.265	119.797	121.25	95.431	178.224	85.362	117.406	93.711	1.995	2.152	2.124	2.128	1.968		178.224	121.25	0.949567
URIQES	102.343	100.004	80.833	116.158	118.804	80.803	175.776	95.908	117.172	80.126	2.384	2.053	2.059	2.048	2.271		175.776	118.804	0.949533
ADAMOJ05	108.927	113.442	172.422	97.264	115.451	75.636	75.672	113.003	107.144	75.254	2.034	2.017	2.083	2.062	2.388		172.422	115.451	0.949517
SAFLUH	176.488	93.352	84.969	84.424	119.519	118.707	96.719	97.405	83.136	118.722	2.242	1.918	2.386	2.452	2.382		176.488	119.519	0.949483
ZIGBIC	90.482	121.47	92.451	178.438	86.438	120.948	117.335	90.185	92.009	88.498	2.335	2.057	2.008	2.389	2.386		178.438	121.47	0.949467
DAPNEP	102.681	98.829	78.533	119.072	109.383	77.569	176.283	103.692	119.316	78.55	2.053	2.077	2.06	2.103	2.254		176.283	119.316	0.94945
POHBAP	87.039	80.236	94.119	117.908	119.722	96.923	177.135	88.036	120.172	93.726	2.481	1.755	1.8	1.77	1.795		177.135	120.172	0.949383
KEXSUC	176.594	82.803	95.696	100.513	119.632	118.897	81.753	82.679	96.54	116.326	2.563	1.75	1.76	1.762	1.765		176.594	119.632	0.949367
FANNOY	95.093	95.191	85.682	121.079	116.489	82.863	178.038	96.237	119.702	84.883	1.909	2.003	2.007	2.115	1.996		178.038	121.079	0.949317
TOJTER01	178.488	95.424	83.251	83.316	121.529	113.437	98.26	95.89	83.922	121.217	2.418	2.227	2.404	2.453	2.44		178.488	121.529	0.949317
HEFKOU	88.353	87.399	119.672	93.87	92.48	119.151	86.177	177.483	120.524	91.691	2.459	2.183	2.158	1.759	1.751		177.483	120.524	0.949317
FAXYIM	82.379	115.308	83.365	178.109	97.402	121.151	119.634	96.508	84.464	95.898	2.22	2.085	1.761	1.78	1.757		178.109	121.151	0.9493
QAJFUD	92.75	119.349	177.947	94.334	120.995	89.836	89.218	119.322	88.689	85.204	1.937	2.136	1.944	1.936	2.137		177.947	120.995	0.9492
QAQBIV	81.23	82.424	98.445	115.837	118.535	95.609	177.447	83.657	120.496	98.736	2.366	1.792	1.794	1.791	1.851		177.447	120.496	0.949183
WODYEV	176.815	99.785	82.155	82.41	117.309	117.453	94.699	98.81	82.177	119.867	1.946	2.009	2.062	2.068	2.055		176.815	119.867	0.949133
WIVXOQ	120.658	90.446	86.806	120.813	94.402	177.758	87.339	117.615	94.631	86.323	1.92	2.122	2.1	2.23	2.461		177.758	120.813	0.949083
AZALAQ	96.723	101.574	81.461	114.373	120.529	80.865	177.471	98.117	118.097	81.104	2.294	2.262	2.257	2.265	2.051		177.471	120.529	0.949033
CUZLUE11	86.685	83.248	96.003	120.024	117.853	96.207	177.137	86.18	120.196	91.607	2.742	1.767	1.78	1.773	1.736		177.137	120.196	0.949017
TAMKOJ	113.078	102.024	74.445	115.202	111.319	75.95	172.135	99.215	114.249	74.81	2.006	2.137	2.231	2.208	2.286		172.135	115.202	0.948883
ICOYOP	77.237	77.603	104.949	119.275	117.651	104.348	176.207	77.269	109.059	98.939	2.216	1.926	1.953	1.937	1.86		176.207	119.275	0.948867
SIGPAB	93.307	101.967	115.635	84.527	75.337	115.966	107	175.103	118.176	77.894	2.433	2.454	2.351	1.922	1.927		175.103	118.176	0.948783
CUZLUE	84.725	86.112	118.172	94.666	93.008	117.956	83.836	178.455	121.529	97.701	2.752	1.756	1.614	1.794	1.732		178.455	121.529	0.948767
CUZLUE10	84.725	86.112	118.173	94.666	93.008	117.954	83.836	178.455	121.529	97.701	2.752	1.756	1.614	1.794	1.732		178.455	121.529	0.948767
HEFGII	80.738	84.323	97.962	114.101	118.138	96.691	178.652	80.145	121.727	100.115	2.533	1.634	1.713	1.747	1.688		178.652	121.727	0.94875
MEKMEU	121.282	118.636	91.884	89.901	91.155	88.108	89.262	89.656	120.078	178.206	1.991	2.021	2.157	1.997	2.089		178.206	121.282	0.948733
OPAUPF	56.933	179.581	91.711	92.977	122.059	122.333	57.72	58.251	122.672	97.328	2.634	2.96	2.909	2.298	2.93		179.581	122.672	0.948483
VAKPIG	177.16	86.986	95.699	90.683	119.337	119.479	86.642	86.742	93.24	120.252	2.667	1.728	1.769	1.759	1.766		177.16	120.252	0.948467
QUSJUK	178.44	93.21	87.019	87.239	121.533	120.736	91.859	92.314	88.297	117.177	1.784	2.529	1.769	1.786	1.753		178.44	121.533	0.94845
GAMXIB	178.929	87.759	93.509	97.416	117.173	118.764	85.777	82.304	93.286	122.026	2.53	1.814	1.748	1.771	1.745		178.929	122.026	0.948383
EGAFAV	119.377	87.752	121.216	88.832	178.118	90.244	119.377	94.13	90.244	88.832	2.389	2.415	2.213	2.365	2.415		178.118	121.216	0.948367
ZUBZIF	99.214	98.256	81.252	122.192	113.401	80.835	179.09	100.002	116.897	80.37	2.379	2.049	2.067	2.097	2.037		179.09	122.192	0.9483
ODUROU	118.296	80.586	101.198	110.239	78.337	178.775	99.376	121.877	79.867	100.687	1.943	2.041	2.057	2.248	1.995		178.775	121.877	0.9483
UJEFIA	83.366	81.256	113.68	97.724	98.124	118.241	80.66	178.91	122.013	98.884	2.237	2.204	1.771	2.211	2.214		178.91	122.013	0.948283
APUCAR	88.365	91.46	90.778	116.828	122.198	88.712	179.087	91.288	120.96	89.378	2.222	1.789	1.788	1.788	1.793		179.087	122.198	0.94815
NIYCAA	176.792	79.264	96.983	102.981	119.908	111.198	79.82	78.929	101.793	118.798	2.246	2.126	2.012	2.023	2.045		176.792	119.908	0.948067
LOBXIL	84.88	121.612	84.286	178.692	95.99	114.111	121.809	93.974	85.156	95.802	2.383	1.892	1.959	2.404	2.439		178.692	121.809	0.94805
TOVFOZ	84.934	86.534	118.747	93.198	93.154	119.592	88.926	177.609	120.727	93.286	2.54	1.786	1.753	1.767	1.749		177.609	120.727	0.948033
VARDIC	85.409	92.44	86.267	85.437	94.727	95.751	120.728	119.563	177.604	118.043	2.412	1.895	2.442	1.931	2.371		177.604	120.728	0.947933
OCPYCU	85.892	118.656	84.512	176.725	96.514	119.783	119.849	91.598	86.545	94.94	2.398	1.882	1.969	2.409	2.403		176.725	119.849	0.947933
HAQSUN	85.54	117.569	179.013	84.871	117.365	96.666	94.637	122.138	82.397	95.848	2.159	1.95	2.225	2.189	2.221		179.013	122.138	0.947917
WAPDOI	94.4	87.127	116.969	86.363	93.669	121.535	90.252	178.409	121.47	88.157	1.759	1.972	1.978	1.776	1.78		178.409	121.535	0.9479
ZEFTEL	103.529	116.971	175.575	100.53	114.705	78.826	79.966	118.701	97.072	79.883	2.076	2.087	2.06	2.093	2.286		175.575	118.701	0.9479
FAPREU	175.776	80.264	102.814	95.553	118.906	118.446	78.287	80.296	102.574	113.126	2.154	2.028	2.009	1.948	1.96		175.776	118.906	0.947833
PALXEH	174.055	74.649	107.837	98.322	110.847	117.186	75.396	75.752	107.523	113.202	2.382	2.032	2.071	2.038	2.067		174.055	117.186	0.947817
TFMAPM	177.306	85.573	92.077	94.528	119.822	120.438	87.001	88.132	92.723	118.868	2.381	1.781	1.751	1.781	1.79		177.306	120.438	0.9478
YIHPAJ	94.778	106.37	83.616	120.646	113.221	76.065	177.513	101.935	115.605	77.35	1.911	1.823	1.936	1.957	2.265		177.513	120.646	0.947783
EGANOP	105.172	119.863	176.727	104.365	114.428	77.053	77.158	110.86	99.728	76.675	2.268	2.26	2.283	2.272	2.39		176.727	119.863	0.947733
AQOVAD	85.671	179.311	118.68	122.45	91.236	93.97	86.633	88.771	93.746	118.069	2.49	1.783	1.794	1.784	1.797		179.311	122.45	0.947683
QUWYUE	113.516	97.271	72.783	111.848	111.667	73.293	170.368	109.601	112.123	73.104	2.736	2.066	2.073	2.1	2.491		170.368	113.516	0.947533
MAMQEX	82.27	120.722	86.521	92.324	177.571	61.697	59.298	61.399	89.203	120.272	3.274	3.335	1.98	2.064	3.28		177.571	120.722	0.947483
GOCDIN	101.845	96.502	81.386	115.245	119.913	81.64	176.76	97.001	118.521	81.716	1.969	2.075	2.062	2.045	2.021		176.76	119.913	0.94745
OYIYIF	97.327	91.348	81.589	121.595	117.838	90.171	178.441	81.504	120.566	98.093	2.432	1.926	1.914	2.418	2.434		178.441	121.595	0.947433
XALHOH	82.612	87.536	96.359	114.664	121.213	94.405	178.059	82.612	121.213	96.359	2.417	1.766	1.766	1.764	1.789		178.059	121.213	0.947433
JAHNAI	89.128	90.323	118.988	90.323	89.128	118.988	90.566	178.867	122.023	90.566	2.206	1.764	2.206	1.764	1.762		178.867	122.023	0.9474
AYUHAF	99.17	98.425	80.901	122.221	114.486	80.705	179.053	100.698	115.327	80.031	2.299	2.296	2.293	2.315	2.059		179.053	122.221	0.9472
QORFAF	88.591	118.089	87.98	178.86	93.846	119.476	122.03	90.376	87.067	92.16	1.951	2.508	2.009	1.988	1.974		178.86	122.03	0.947167
FUYNAO	83.504	81.645	97.348	119.434	121.957	97.215	178.787	81.711	113.238	98.585	2.498	1.941	1.758	1.716	1.707		178.787	121.957	0.947167
XETREV01	91.327	120.827	88.13	178.418	90.044	117.581	121.588	90.07	89.878	90.506	2.548	2.363	2.789	2.583	2.564		178.418	121.588	0.947167
PHTPRE	88.671	88.708	118.821	92.644	88.708	120.59	92.644	177.417	120.59	88.671	2.392	2.029	2.392	2.024	2.029		177.417	120.59	0.947117
GALLIO	84.345	86.477	94.777	116.157	121.395	95.305	178.217	85.191	120.5	93.82	1.878	2.425	2.472	2.427	1.941		178.217	121.395	0.947033
JUMBOK	94.556	120.441	177.553	97.839	115.365	85.81	85.425	120.732	96.293	80.098	2.003	2.321	2.124	1.992	2.296		177.553	120.732	0.947017
ELOLOH	89.427	122.146	89.814	178.964	90.737	115.699	122.146	89.538	89.814	90.737	1.761	2.182	2.191	1.842	1.842		178.964	122.146	0.946967
YEZGAN	97.215	178.321	121.504	118.372	81.713	81.033	100.513	98.209	81.377	113.471	2.222	2.053	2.078	2.045	2.074		178.321	121.504	0.94695
UKEJUP	175.983	80.563	100.815	102.126	117.676	119.172	80.89	80.263	95.444	115.262	2.226	2.219	2.087	2.095	2.091		175.983	119.172	0.94685
ADAMOJ04	108.783	112.846	173.223	98.248	116.412	75.916	75.961	113.06	105.912	75.238	2.044	2.011	2.071	2.081	2.39		173.223	116.412	0.94685
GAPYAX	114.677	89.945	122.659	90.341	179.47	89.382	122.659	90.341	89.945	90.088	2.551	2.551	2.254	2.245	2.53		179.47	122.659	0.94685
MOJKAY	103.043	102.243	79.029	117.318	119.57	79.483	176.376	97.147	112.903	79.239	2.072	2.054	2.045	2.094	2.339		176.376	119.57	0.946767
ORUWAA	178.914	86.525	93.648	93.615	119.101	117.435	86.471	85.411	94.374	122.108	1.933	1.965	2.038	2.019	2.019		178.914	122.108	0.946767
TOJTER	178.27	96.11	83.242	83.724	121.476	121	98.487	95.504	83.005	113.502	2.421	2.215	2.455	2.42	2.446		178.27	121.476	0.946567
SEGBIQ	80.602	98.587	81.975	82.797	98.987	97.059	118.656	121.412	178.202	113.875	1.851	2.38	1.813	1.781	1.837		178.202	121.412	0.9465
TULPIB	103.251	100.799	78.219	110.88	115.1	76.841	177.637	102.759	120.848	78.299	2.074	2.044	2.055	2.048	2.24		177.637	120.848	0.946483
UWALEK	88.479	91.965	90.498	122.192	116.054	88.589	178.976	90.138	121.752	90.392	2.248	1.784	1.79	1.795	1.768		178.976	122.192	0.9464
WEXYON	83.904	117.253	85.171	178.988	93.131	122.206	118.653	95.102	87.164	95.484	2.43	1.909	1.981	2.391	2.401		178.988	122.206	0.946367
QAWWAM	176.73	80.749	99.044	99.556	116.939	119.951	78.193	83.282	99.287	115.434	2.511	1.795	1.73	1.594	1.807		176.73	119.951	0.946317
LASSUU	179.342	84.11	94.875	96.916	119.318	114.897	84.472	83.515	96.1	122.565	2.004	1.926	2.067	2.088	2.111		179.342	122.565	0.946283
CUNLOM	97.336	97.464	118.336	80.927	81.396	116.24	98.08	177.001	120.227	84.905	1.98	2.03	2.188	2.007	2.001		177.001	120.227	0.946233
MADCUS	87.827	87.982	93.129	118.792	121.787	92.494	178.559	87.485	118.968	91.109	2.351	1.788	1.794	1.788	1.776		178.559	121.787	0.9462
NIHQOL	104.919	118.88	97.54	175.651	79.261	117.4	113.414	79.121	99.887	79.203	2.35	2.043	2.321	2.319	2.349		175.651	118.88	0.946183
XUGLIV	178.536	78.57	100.44	97.326	110.996	121.766	78.219	82.848	102.695	117.965	2.177	1.973	1.978	2.046	2.063		178.536	121.766	0.946167
XUQJAV	90.929	177.976	120.027	121.206	90.483	91.179	89.929	87.499	89.983	118.74	2.428	2.526	2.396	2.426	2.393		177.976	121.206	0.946167
SUCXOD	84.062	95.252	86.111	84.818	95.888	93.869	122.288	113.074	179.17	122.401	2.459	1.922	2.447	1.972	2.398		179.17	122.401	0.94615
VEYFAI	80.395	80.731	95.121	117.653	117.565	104.376	174.417	80.764	116.989	98.561	2.75	2.129	2.124	2.146	1.912		174.417	117.653	0.946067
UMEJED	107.722	103.281	76.287	112.431	119.16	74.286	175.923	102.95	110.025	75.798	2.327	2.056	2.081	2.079	2.343		175.923	119.16	0.94605
UZONAA	177.639	96.659	81.561	82.038	118.769	120.878	97.569	100.314	81.965	114.422	1.954	2.034	2.07	2.041	2.065		177.639	120.878	0.946017
TOJLAH	80.567	80.411	99.359	121.548	114.124	98.147	178.307	81.129	116.637	100.308	1.976	2.215	2.228	2.267	1.882		178.307	121.548	0.945983
DIHPOB	120.814	88.196	118.409	90.842	177.571	86.384	120.032	93.492	86.791	94.272	2.124	2.118	1.887	1.956	2.11		177.571	120.814	0.94595
YUKDAJ	89.273	90.991	118.206	89.624	91.313	120.842	88.475	177.694	120.937	90.262	2.26	1.788	1.772	1.773	1.78		177.694	120.937	0.94595
QEHTOO	99.247	115.412	96.463	178.216	83.92	121.462	118.395	82.305	96.162	81.995	2.041	1.954	2.016	2.037	2.07		178.216	121.462	0.9459
WALFEX	116.067	99.95	82.739	120.508	96.969	177.261	82.788	118.262	95.929	81.711	1.803	1.912	1.863	1.783	2.308		177.261	120.508	0.945883
XEZZAF	96.093	118.433	102.872	175.184	79.094	113.093	118.061	79.113	103.818	79.211	2.044	2.016	2.168	2.038	2.032		175.184	118.433	0.94585
DOPFET	87.96	117.123	179.166	86.254	119.319	94.542	91.522	122.421	85.116	94.576	1.788	2.124	1.839	1.784	1.804		179.166	122.421	0.94575
IDUCIV	79.081	119.271	78.12	176.016	99.05	119.054	109.321	104.365	77.379	102.354	2.403	2.444	1.892	2.406	2.368		176.016	119.271	0.94575
JANXOL	84.736	81.044	95.972	121.29	119.024	100.234	178.031	87.159	116.816	90.905	2.626	1.708	1.701	1.732	1.733		178.031	121.29	0.945683
REHZEM	87.709	88.957	90.943	121.888	121.909	91.556	178.649	89.085	116.022	91.704	2.194	1.769	1.781	1.766	1.779		178.649	121.909	0.945667
WEMCID	120.617	80.409	100.331	116.572	78.57	177.357	99.968	111.603	77.295	103.644	1.95	2.052	2.033	2.264	2.013		177.357	120.617	0.945667
VAGFEO	90.398	90.854	119.365	89.595	89.97	122.336	89.678	179.068	118.29	89.513	1.823	1.8	1.823	1.797	1.801		179.068	122.336	0.945533
KACSUE	91.942	91.942	89.382	120.671	120.671	89.382	177.402	86.02	118.657	91.382	2.478	1.798	1.799	1.798	1.771		177.402	120.671	0.945517
SELXIQ	83.654	83.654	117.48	95.489	95.489	117.48	83.854	178.216	121.494	97.93	2.039	2.065	1.994	2.065	2.083		178.216	121.494	0.945367
BAVKEO11	92.985	119.704	177.649	98.734	115.104	81.123	84.877	120.929	99.139	83.227	1.977	1.996	2.048	2.053	2.071		177.649	120.929	0.945333
POHBAP	83.536	84.11	95.677	120.689	116.76	94.185	177.409	87.09	120.201	95.426	2.514	1.743	1.757	1.755	1.795		177.409	120.689	0.945333
VAZPEU	178.201	88.832	88.726	92.679	120.546	121.482	90.215	89.101	90.48	117.937	3.223	2.638	2.286	2.293	2.287		178.201	121.482	0.945317
QOLGIJ01	57.639	58.794	99.496	121.073	120.56	105.555	74.708	177.791	99.956	107.444	2.792	2.723	2.504	2.661	2.523		177.791	121.073	0.9453
YURXEP	83.622	84.676	122.308	96.256	96.241	117.668	84.202	179.019	116.95	95.052	2.506	1.943	1.977	1.948	1.949		179.019	122.308	0.945183
FODGAH	118.464	85.146	97.325	117.371	81.621	176.757	97.558	120.047	82.885	95.443	2.016	2.058	2.055	2.028	1.909		176.757	120.047	0.945167
YECGES	121.894	76.259	105.927	103.536	75.086	178.601	102.374	115.853	74.697	105.892	2.015	2.158	2.128	2.475	2.052		178.601	121.894	0.945117
SUCXOD01	85.894	122.203	84.066	179.004	96.033	113.212	122.298	93.937	84.882	95.203	2.396	1.923	1.957	2.443	2.457		179.004	122.298	0.9451
COCPOP01	177.316	95.868	85.978	83.442	120.612	117.492	95.481	93.877	85.426	119.582	2.122	2.672	1.781	1.788	1.785		177.316	120.612	0.945067
MIWHAD	99.303	97.88	85.006	118.821	117.662	80.997	175.525	95.488	118.402	81.292	1.904	1.965	2.078	2.084	2.01		175.525	118.821	0.945067
VAGMIC	89.854	87.96	120.486	90.815	90.713	121.967	89.59	178.671	117.479	91.061	2.385	2.026	1.827	2.043	2.053		178.671	121.967	0.945067
VUCYIB	89.317	177.944	121.245	119.254	91.871	92.728	86.805	90.102	89.215	119.356	2.478	1.758	1.747	1.76	1.751		177.944	121.245	0.944983
WICHUL01	177.888	89.931	91.937	94.232	120.737	117.399	86.343	85.625	91.95	121.191	2.472	1.753	1.755	1.773	1.777		177.888	121.191	0.94495
YERPOD	177.828	88.931	98.208	79.218	120.94	117.928	81.545	99.045	93.082	121.132	2.096	2.174	2.055	2.062	1.955		177.828	121.132	0.944933
MUYTIJ	83.082	94.828	88.504	84.223	95.187	94.206	120.478	119.366	177.172	118.131	2.162	2.011	2.183	2.199	2.22		177.172	120.478	0.9449
AKEJAD	121.856	122.186	94.228	86.496	95.581	84.875	88.82	90.072	115.912	178.88	1.849	2.167	2.165	2.169	2.187		178.88	122.186	0.9449
IBIGIJ	84.571	86.008	97.275	120.718	118.659	91.511	177.408	83.3	118.009	97.26	2.154	1.991	2.002	1.981	2.015		177.408	120.718	0.944833
RUHHEJ	101.457	100.266	79.851	120.176	121.896	79.75	178.585	98.348	109.076	80.482	1.938	2.096	2.034	2.107	2.079		178.585	121.896	0.944817
LUBKUO	94.09	120.683	92.898	177.372	83.275	118.729	118.133	86.503	98.593	84.57	2.308	2.393	2.18	2.361	2.395		177.372	120.683	0.944817
XUNBIT	89.687	89.611	89.636	122.556	120.076	90.999	179.244	91.315	117.364	88.767	2.285	3.015	3.03	3.007	2.283		179.244	122.556	0.9448
YUSBUL	176.696	82.758	100.062	97.223	120.009	117.646	82.764	79.924	97.339	116.357	2.582	1.792	2.192	2.197	2.191		176.696	120.009	0.944783
RODMAY	177.393	84.201	96.058	98.684	117.472	116.592	81.913	81.034	98.197	120.707	2.09	1.762	1.836	1.839	1.819		177.393	120.707	0.944767
MALWOL	95.504	120.365	97.808	177.051	84.099	119.966	116.914	84.547	93.351	84.772	2.289	1.783	2.257	2.304	2.31		177.051	120.365	0.944767
GIDQES02	92.799	118.437	92.899	178.735	88.623	122.052	118.98	88.203	91.576	85.938	2.513	2.052	1.999	2.48	2.566		178.735	122.052	0.944717
VEPWOC	89.25	90.568	122.183	90.201	90.568	118.909	90.201	178.864	118.909	89.25	2.441	1.791	2.441	1.786	1.791		178.864	122.183	0.944683
TUFPAL	176.214	101.781	80.439	81.058	116.117	117.385	97.499	97.323	81.999	119.535	1.809	2.262	2.032	2	2.012		176.214	119.535	0.94465
TUFPAL01	176.214	101.781	80.439	81.058	116.117	117.385	97.499	97.323	81.999	119.535	1.809	2.262	2.032	2	2.012		176.214	119.535	0.94465
OZUGAT	84.388	94.743	84.062	85.842	95.538	95.349	115.537	120.073	178.608	121.932	2.452	1.926	2.397	1.979	2.42		178.608	121.932	0.9446
PUKTAQ	176.3	78.182	102.921	99.78	119.631	114.97	79.811	81.068	98.327	115.991	2.886	2.027	1.986	1.925	1.988		176.3	119.631	0.944483
QOKFIH	119.698	176.367	93.635	59.18	119.233	88.626	95.004	60.635	60.054	95.231	2.008	3.387	3.37	2.011	3.109		176.367	119.698	0.944483
DAVXOO	100.437	176.08	119.414	116.461	80.644	87.804	95.208	100.101	75.858	117.585	2.294	1.935	1.914	2.608	2.287		176.08	119.414	0.944433
DOFBIJ	79.349	83.211	98.601	121.192	114.134	98.348	177.852	79.768	117.007	100.862	2.45	1.741	1.757	1.767	2.166		177.852	121.192	0.944333
JUDMOM	99.358	97.935	81.693	112.535	122.19	81.122	178.85	98.06	118.913	81.93	2.378	2.097	2.068	2.055	2.031		178.85	122.19	0.944333
YIDSAI	98.9	107.358	80.629	109.362	122.179	71.897	178.838	104.626	111.566	76.535	2.253	2.075	1.912	1.844	2.367		178.838	122.179	0.944317
EZILOP	88.465	177.955	118.52	120.18	88.315	91.474	90.558	90.826	90.363	121.301	1.937	1.932	1.933	1.954	1.946		177.955	121.301	0.944233
JIJFUD	90.427	89.887	90.771	121.742	122.144	89.684	178.797	90.758	116.102	88.518	2.233	1.794	1.767	1.78	2.234		178.797	122.144	0.944217
UYASOE	86.035	119.485	177.683	95.109	119.485	88.841	95.109	121.03	88.841	86.035	1.974	2.058	1.974	1.99	2.058		177.683	121.03	0.944217
NIPCUK	93.798	119.098	92.459	179.32	86.586	122.672	117.271	86.736	93.518	86.921	2.306	1.947	2.142	2.277	2.278		179.32	122.672	0.944133
IJIYIJ	89.855	89.855	90.524	89.634	90.524	89.634	123.064	123.064	179.709	113.872	2.259	2.033	2.233	2.033	2.233		179.709	123.064	0.944083
HEMFEK	177.622	83.874	92.236	92.966	120.98	120.978	88.296	88.849	93.87	117.208	2.65	1.739	1.785	1.719	1.771		177.622	120.98	0.944033
GEPVED	101.978	119.112	178.417	78.808	119.112	89.208	78.808	121.775	89.208	101.978	2.287	2.289	2.287	2.083	2.289		178.417	121.775	0.944033
TOJTIV	178.22	95.512	83.834	84.177	113.804	121.578	95.002	97.585	83.981	121.363	2.521	2.225	2.418	2.411	2.393		178.22	121.578	0.944033
FOFHAL	94.492	98.013	84.014	121.099	117.526	84.197	177.74	95.311	118.226	84.044	2.005	2.066	2.088	2.084	2.059		177.74	121.099	0.944017
WODYEV01	176.542	82.001	99.915	98.841	119.904	117.662	82.313	82.382	94.603	117.039	2.006	1.952	2.061	2.059	2.071		176.542	119.904	0.943967
VARDIC01	121.128	119.788	85.874	95.965	94.414	85.84	85.477	92.478	117.436	177.766	2.413	2.381	1.934	2.442	1.895		177.766	121.128	0.943967
FANMEP	85.981	85.884	95.99	117.873	121.388	92.959	178.018	86.217	119.312	93.025	2.198	2.284	2.259	2.261	2.219		178.018	121.388	0.943833
GUSCUT	90.294	90.294	90.501	89.218	90.501	89.218	118.607	118.607	179.413	122.786	2.241	2.106	2.233	2.106	2.233		179.413	122.786	0.943783
ZUBZAX	104.865	100.073	77.011	110.613	114.892	78.012	177.876	101.916	121.251	78.193	2.271	2.06	2.086	2.074	2.238		177.876	121.251	0.94375
XOGRAM	82.682	83.108	97.226	112.699	122.634	96.315	179.258	83.489	120.373	97.22	2.355	1.784	1.771	1.792	1.802		179.258	122.634	0.943733
DTHFEC	179.386	89.785	92.797	86.33	122.764	121.939	86.598	93.834	90.624	115.296	1.789	2.288	1.738	1.773	1.788		179.386	122.764	0.9437
XADXAB	92.391	119.046	95.2	177.46	84.324	118.027	120.843	85.07	96.886	86.171	2.313	2.135	2.18	2.307	2.299		177.46	120.843	0.943617
HIWLUV	176.608	81.442	97.936	100.182	113.204	119.992	80.612	77.932	101.921	117.965	2.181	2.129	2.089	2	2.027		176.608	119.992	0.9436
YOXWUF	92.461	92.527	87.783	117.672	123.043	87.565	179.658	92.09	118.781	87.584	2.491	1.9	1.889	1.893	2.01		179.658	123.043	0.943583
JAMGAG	177.813	79.403	104.299	100.626	121.199	115.468	77.797	77.909	100.109	111.454	2.193	1.825	1.95	1.943	1.914		177.813	121.199	0.943567
ROFKAA	93.092	118.131	90.574	178.651	91.879	122.042	119.798	88.101	88.115	88.285	2.213	1.742	2.301	2.122	2.189		178.651	122.042	0.943483
QEVHEF	88.641	178.467	121.212	121.859	90.502	90.065	90.729	90.307	89.826	116.928	1.829	1.796	1.778	1.797	1.775		178.467	121.859	0.943467
AQUFIC	98.108	97.985	81.418	111.457	119.299	81.701	179.146	99.959	122.539	80.882	2.242	2.082	2.076	2.038	2.033		179.146	122.539	0.94345
WEMCEZ	121.319	80.743	104.616	108.368	78.077	177.923	98.065	119.244	77.461	101.124	1.96	2.013	2.025	2.297	2.004		177.923	121.319	0.9434
OZUGAT	95.775	121.772	95.857	178.372	84.365	116.586	119.186	85.305	94.027	84.657	2.417	1.968	1.928	2.424	2.438		178.372	121.772	0.943333
VECWIM	86.777	86.652	94.684	121.3	117.857	91.31	177.9	86.377	119.799	94.135	2.404	2.143	2.154	2.146	2.313		177.9	121.3	0.943333
KAPMIZ	80.941	177.459	120.519	111.734	99.818	95.978	81.517	81.186	100.777	120.859	2.467	1.917	1.923	1.924	1.989		177.459	120.859	0.943333
QOMROB	177.414	80.694	95.753	100.215	115.756	120.815	83.373	82.333	97.724	117.903	2.254	1.794	1.801	1.869	1.869		177.414	120.815	0.943317
DANWUN	80.202	85.741	119.113	96.491	93.334	118.002	78.045	175.712	116.106	106.041	2.554	2.07	2.055	2.03	2.089		175.712	119.113	0.943317
WEZKAN	86.373	177.298	118.603	119.653	92.342	93.166	88.485	84.974	94.702	120.701	2.597	1.738	1.76	1.747	1.762		177.298	120.701	0.943283
REMLEA	179.492	91.474	89.572	89.822	116.162	122.898	90.794	89.688	88.624	120.901	1.769	2.231	1.772	1.791	1.763		179.492	122.898	0.943233
NAYXEQ	175.918	78.163	98.08	103.599	111.233	116.43	78.161	77.15	105.113	119.325	2.178	1.739	2.048	2.052	2.045		175.918	119.325	0.943217
BACYAI	97.851	97.22	81.451	120.524	118.294	80.562	177.117	102.031	113.807	80.69	2.125	2.032	2.023	2.043	2.241		177.117	120.524	0.943217
WEQLEJ	109.748	108.306	173.216	99.96	116.627	75.531	74.747	114.438	107.108	73.363	2.096	2.062	2.124	2.13	2.509		173.216	116.627	0.94315
GAHDEA	54.902	83.221	107.957	110.438	112.747	169.331	86.635	55.723	63.246	63.377	2.848	2.859	2.878	2.147	2.15		169.331	112.747	0.943067
IDEFII	176.604	76.062	104.447	104.817	120.021	107.634	77.72	76.223	100.708	116.707	2.406	2.042	2.02	2.018	2.01		176.604	120.021	0.94305
MOJKAY	95.166	99.995	81.028	117.609	115.644	80.934	175.996	102.185	119.414	80.79	2.035	2.062	2.052	2.066	2.283		175.996	119.414	0.943033
APUCAR	88.267	90.92	91.479	116.635	122.074	88.081	178.653	91.782	121.281	89.514	2.218	1.79	1.79	1.789	1.787		178.653	122.074	0.942983
MIYXEY	79.943	78.55	100.148	115.778	119.709	98.109	176.287	79.556	114.475	103.636	2.241	2.155	2.183	2.18	1.828		176.287	119.709	0.942967
KEYNAD	84.299	84.252	97.107	120.318	120.149	97.605	176.893	80.732	115.2	96.172	2.551	1.706	1.679	1.724	1.712		176.893	120.318	0.942917
FAWGUF	177.17	86.284	96.871	93.77	119.224	118.52	85.954	84.91	92.192	120.595	2.751	1.667	1.858	1.768	1.772		177.17	120.595	0.942917
ISOFIF	95.451	96.982	83.305	122.117	119.309	83.182	178.689	98.069	114.351	82.963	1.788	1.905	1.827	1.822	2.308		178.689	122.117	0.942867
HOKYUC	178.188	100.747	79.567	80.439	118.546	111.33	98.841	99.754	80.688	121.621	1.921	2.246	2.009	2.016	2.004		178.188	121.621	0.942783
LOBXIL	85.286	120.523	86.045	177.32	95.749	117.009	120.756	92.034	85.622	95.357	2.415	1.889	1.959	2.404	2.385		177.32	120.756	0.942733
UZOMAZ	78.414	84.107	100.359	118.02	114.233	98.044	177.849	82.123	121.287	96.98	2.394	1.687	1.779	1.779	1.788		177.849	121.287	0.9427
ACBPCO	177.573	94.659	86.308	85.661	120.568	116.903	95.623	92.077	85.753	121.012	2.173	2.663	1.756	1.772	1.773		177.573	121.012	0.942683
CINVAW	89.578	90.094	91.754	117.25	120.854	89.861	178.457	90.287	121.896	88.412	2.181	2.24	2.244	2.266	2.185		178.457	121.896	0.942683
ZICFOI	99.657	100.441	77.104	119.419	110.397	79.278	175.979	104.334	118.637	79.448	1.872	2.024	2.01	2.009	2.28		175.979	119.419	0.942667
MOJSEK	89.971	88.105	90.601	117.419	122.872	91.606	179.429	90.416	119.685	89.326	2.347	1.838	1.786	1.829	2.382		179.429	122.872	0.942617
CUBDOT	69.86	172.587	112.038	103.955	109.039	116.03	70.877	69.319	104.079	110.836	2.484	2.416	2.426	2.572	2.396		172.587	116.03	0.942617
DIDYOF	177.912	100.305	78.279	78.826	113.174	121.358	101.005	103.243	78.512	113.861	2.436	2.201	2.023	2	2.02		177.912	121.358	0.942567
WEMCUP	101.467	175.482	115.507	118.932	77.289	80.885	103.098	98.961	78.448	114.596	2.373	2.036	2.056	2.269	1.962		175.482	118.932	0.9425
XEHWIQ	122.382	121.124	58.563	94.467	93.952	58.77	178.931	120.744	97.378	58.36	2.326	2.464	2.465	2.45	2.582		178.931	122.382	0.942483
PUNCEG	176.291	100.109	80.315	80.283	115.884	116.24	96.118	102.491	80.698	119.744	1.991	2.195	1.975	1.968	1.99		176.291	119.744	0.94245
VIKGOL	177.425	97.186	84.946	80.32	119.445	115.471	96.218	97.117	84.35	120.88	2.281	2.014	2.29	2.314	2.304		177.425	120.88	0.942417
EDATAG	116.502	117.546	97.208	81.811	81.486	97.366	97.235	85.004	121.216	177.76	1.896	1.943	2.323	1.983	1.95		177.76	121.216	0.9424
IBIPUH	106.972	117.224	96.822	173.765	79.823	116.67	115.948	79.085	98.309	78.889	2.333	1.936	2.309	2.279	2.279		173.765	117.224	0.94235
NECVAV	86.03	80.521	120.779	94.384	96.955	118.88	86.478	177.319	117.49	95.568	2.327	1.768	1.787	1.764	1.775		177.319	120.779	0.942333
EQEZAC	97.003	113.17	96.86	179.193	81.843	122.658	118.98	82.726	98.96	82.623	2.06	1.929	2.021	2.067	2.044		179.193	122.658	0.94225
BIXMEA	177.431	81.513	99.917	100.659	120.898	114.463	80.446	81.352	96.048	117.602	2.045	1.959	2.064	2.075	2.099		177.431	120.898	0.942217
GOGHOZ	104.795	100.767	78.385	108.854	119.696	75.82	176.228	102.813	117.251	77.808	2.264	2.076	2.06	2.09	2.283		176.228	119.696	0.9422
KIDPIW01	84.293	84.904	93.77	121.34	121.086	96.74	177.866	84.426	114.882	95.85	1.904	2.386	2.386	2.405	1.936		177.866	121.34	0.9421
IBOCOS	101.088	103.76	77.93	118.54	108.902	79.456	176.625	100.844	120.099	76.974	2.286	2.211	2.186	2.152	2.113		176.625	120.099	0.9421
HOVPEN	77.366	177.964	112.011	121.457	100.792	104.685	75.862	77.205	104.125	111.374	1.576	2.261	2.254	2.309	2.26		177.964	121.457	0.941783
YERPUJ	90.459	98.799	119.144	91.88	78.556	120.609	81.958	177.114	120.23	98.355	2.09	2.074	2.187	2.051	1.956		177.114	120.609	0.94175
CEDWIR	84.14	176.461	111.834	119.863	99.594	100.333	79.596	77.497	99.123	119.961	2.685	1.731	1.751	1.797	1.752		176.461	119.961	0.941667
EZIREK	105.865	108.556	72.04	110.779	119.104	75.819	175.604	105.823	105.997	71.797	2.212	2.034	2.029	2.036	2.665		175.604	119.104	0.941667
EYINIL	92.488	177.358	120.858	119.834	84.512	85.831	95.587	96.791	84.871	117.116	1.961	2.395	2.408	1.895	2.382		177.358	120.858	0.941667
FOJBOV	122.935	115.412	88.214	91.225	87.646	92.717	91.462	88.775	121.604	179.433	1.837	1.828	1.786	1.828	1.807		179.433	122.935	0.941633
GIHWOK01	98.3	98.364	80.857	109.901	120.629	81.862	179.101	99.63	122.604	80.976	2.237	2.069	2.045	2.06	2.064		179.101	122.604	0.941617
TUFPAL	175.323	103.673	78.732	79.575	115.262	116.516	97.927	99.4	80.826	118.834	1.823	2.241	2.037	2.004	2.041		175.323	118.834	0.941483
TUFPAL01	175.323	103.673	78.732	79.575	115.262	116.516	97.927	99.4	80.826	118.834	1.823	2.241	2.037	2.004	2.041		175.323	118.834	0.941483
JUDMEC	179.214	104.911	74.622	75.755	122.727	108.214	105.996	103.538	75.279	110.064	2.504	2.406	2.092	2.086	2.116		179.214	122.727	0.94145
ZEFWAI	88.75	89.473	92.483	121.959	118.175	89.089	178.443	91.571	119.866	88.583	2.219	1.772	1.758	1.78	2.218		178.443	121.959	0.9414
KIDPIW	95.865	121.187	93.581	177.7	84.888	114.87	121.216	84.201	97.021	84.435	2.379	1.933	1.896	2.399	2.384		177.7	121.216	0.9414
YUPKAW	89.35	120.995	177.477	89.35	120.995	91.262	89.35	118.011	91.262	89.35	2.038	2.059	2.038	1.944	2.059		177.477	120.995	0.941367
GERSUR	177.136	82.478	96.061	97.908	117.15	120.655	81.652	84.711	97.287	117.707	2.876	1.795	1.758	1.791	1.765		177.136	120.655	0.94135
PIVHAD	84.394	94.481	85.185	83.686	97.419	94.881	122.22	117.082	178.699	117.906	2.396	1.931	2.395	2.04	2.395		178.699	122.22	0.941317
EREBEK	177.169	90.082	91.19	88.734	119.85	119.458	91.19	88.734	90.082	120.691	2.608	2.608	2.353	2.361	2.318		177.169	120.691	0.9413
VISCIK	99.958	108.82	177.793	99.136	121.322	79.902	79.091	120.182	102.301	79.725	2.02	2.074	2.041	2.025	2.247		177.793	121.322	0.941183
CUNSEL	97.001	117.252	95.333	176.536	81.59	120.066	118.097	85.62	99.133	81.411	2.184	1.808	2.259	2.228	2.237		176.536	120.066	0.941167
OWURUU	118.99	118.99	88.781	91.953	88.781	91.953	89.243	89.243	122.019	178.487	2.468	1.79	1.806	1.79	1.806		178.487	122.019	0.941133
POFGIC	173.557	76.87	104.961	105.23	117.092	115.997	78.185	78.171	96.688	113.74	2.728	2.088	2.144	2.125	2.097		173.557	117.092	0.941083
FOQVOW	95.514	91.19	87.687	119.771	120.278	87.757	176.741	90.281	119.462	87.59	2.637	2.12	2.119	2.12	2.157		176.741	120.278	0.94105
VUWRAG	84	174.204	117.743	116.165	100.591	101.349	74.818	77.51	101.707	115.012	2.534	1.699	1.699	1.7	1.699		174.204	117.743	0.941017
MAWZER	88.615	88.717	98.481	81.043	100.493	82.686	119.281	120.865	177.326	119.812	1.986	2.167	2.19	2.177	2.212		177.326	120.865	0.941017
QICZIN	175.801	102.407	79.681	79.872	112.765	119.342	103.2	96.029	78.531	117.888	2.412	2.065	2.452	2.439	2.42		175.801	119.342	0.940983
KUHYET	96.262	102.945	82.943	118.674	119.9	80.575	176.354	95.202	115.528	82.114	1.954	2.057	2.065	2.126	2.027		176.354	119.9	0.9409
BAVPIX	114.999	85.938	98.47	118.79	83.292	179.226	94.131	122.772	82.193	96.027	1.993	2.053	2.028	2.007	1.932		179.226	122.772	0.9409
UTOJUK	176.457	78.403	99.382	94.224	119.471	120.003	80.667	88.925	98.598	115.583	1.541	1.79	1.804	1.803	1.812		176.457	120.003	0.9409
ZEFTEL	100.483	100.262	79.83	123.167	109.654	79.76	179.62	99.459	118.116	80.181	2.063	2.12	2.103	2.095	2.233		179.62	123.167	0.940883
TEGGES	121.885	118.877	91.605	90.049	88.088	90.933	90.392	88.902	119.151	178.335	2.001	2.026	2.122	1.944	2.08		178.335	121.885	0.940833
KUBWIP	96.062	101.178	81.209	120.599	113.54	81.186	177.049	99.95	118.637	80.591	1.986	2.11	2.124	2.105	2.214		177.049	120.599	0.940833
FIHFIO	91.277	91.277	90.286	88.456	90.286	88.456	119.501	119.501	177.446	120.997	2.271	2.111	1.876	2.111	1.876		177.446	120.997	0.940817
WEFTEG	96.747	118.741	95.61	177.518	84.595	117.781	121.07	85.148	93.077	84.743	2.412	1.987	1.912	2.394	2.389		177.518	121.07	0.9408
LUJQIS01	178.535	76.313	101.056	102.724	118.76	105.781	80.395	76.57	103.023	122.09	2.334	1.982	2.044	2.046	2.138		178.535	122.09	0.94075
WUVPIN	99.139	117.668	97.021	175.87	79.179	113.604	119.428	80.134	104.671	79.914	2.316	2.061	2.319	2.331	2.316		175.87	119.428	0.9407
BOGMEP	94.994	122.489	94.594	178.928	84.942	119.96	115.25	83.945	95.516	86.006	2.458	2.006	1.906	2.397	2.415		178.928	122.489	0.94065
RIJQIN	82.989	98.762	79.575	81.417	100.077	97.317	117.702	115.095	176.883	120.445	1.944	2.45	1.926	1.928	1.965		176.883	120.445	0.940633
POCDIW	118.879	74.844	119.942	97.661	176.378	76.885	111.106	102.466	85.816	102.102	2.061	2.349	2.332	2.313	2.028		176.378	119.942	0.9406
VODMIK	177.656	91.675	87.573	86.649	121.221	120.38	93.068	95.047	86.059	117.444	2.605	2.236	2.333	2.315	2.335		177.656	121.221	0.940583
FUDKAQ	91.394	178.934	122.503	114.639	88.031	88.021	93.045	91.394	88.031	122.503	1.803	1.753	1.753	1.781	1.772		178.934	122.503	0.940517
SIQKUY	176.902	80.965	99.547	96.498	119.032	120.471	83.55	82.042	97.437	115.01	2.554	1.784	1.774	1.758	1.756		176.902	120.471	0.940517
LIXGOP	177.737	95.591	85.665	84.894	121.309	116.639	94.713	92.997	86.22	120.29	2.286	1.95	2.032	2.008	2.015		177.737	121.309	0.940467
UJEYEP	114.589	81.864	101.954	119.499	78.421	175.925	100.368	117.183	80.042	97.511	1.952	2.046	2.066	2.192	2.003		175.925	119.499	0.940433
ZAVLEN	91.49	91.49	97.424	81.084	97.424	81.084	119.703	119.703	177.02	120.595	2.491	1.983	2.091	1.983	2.091		177.02	120.595	0.940417
ADAMOJ02	109.701	112.649	173.072	98.238	116.647	75.726	75.79	112.892	105.207	75.434	2.045	2.01	2.072	2.076	2.39		173.072	116.647	0.940417
TAMCUG	120.549	98.184	118.871	83.529	176.972	93.531	117.96	84.791	94.431	85.528	2.398	2.449	1.921	2.251	2.377		176.972	120.549	0.940383
OQUMEU	173.559	109.999	77.228	78.544	112.007	117.138	97.628	100.675	76.039	116.686	2.475	2.266	1.965	2.052	1.954		173.559	117.138	0.94035
DIYRIO	79.616	117.48	88.836	177.673	79.616	121.26	121.26	101.614	101.614	88.836	2.001	2.149	2.149	2.001	1.984		177.673	121.26	0.940217
YETNIU	103.308	96.911	79.49	115.929	120.039	79.836	176.452	99.263	115.539	81.284	1.88	2.168	2.109	2.138	1.991		176.452	120.039	0.940217
VAGXUW	83.917	177.819	121.409	116.845	94.758	93.23	86.532	87.229	94.37	120.221	2.289	1.742	1.712	1.774	1.784		177.819	121.409	0.940167
XIRFEK	121.132	101.546	76.948	116.225	91.828	177.541	80.912	116.242	101.588	87.096	1.962	1.969	1.997	1.971	2.307		177.541	121.132	0.94015
ILUVIV	98.268	100.341	81.614	119.096	111.135	80.469	179.081	98.105	122.675	81.177	2.239	2.039	2.093	2.069	2.041		179.081	122.675	0.9401
ITAFAL	103.314	100.027	77.104	108.871	116.732	75.45	174.839	107.553	118.437	76.972	2.815	2.273	2.268	2.302	2.415		174.839	118.437	0.940033
TOJTIV01	178.141	97.998	83.129	83.999	113.027	121.739	95.438	95.78	83.777	121.563	2.519	2.221	2.436	2.442	2.395		178.141	121.739	0.940033
WUVNIL	175.653	97.214	79.621	80.154	116.637	114.238	102.816	101.528	78.47	119.252	2.052	2.318	2.312	2.319	2.311		175.653	119.252	0.940017
YOXXAM	92.616	92.536	87.481	123.092	117.772	87.854	179.491	92.023	118.618	87.505	2.531	1.903	1.897	1.908	2.018		179.491	123.092	0.939983
LIXGUV	178.345	93.596	85.485	86.912	121.949	120.688	95.26	94.085	84.755	115.692	2.42	1.953	2.042	2.041	2.047		178.345	121.949	0.939933
FIBFIF	81.997	117.269	76.803	177.403	101.332	121.008	112.594	95.7	80.844	103.091	2.083	1.56	1.726	1.727	1.735		177.403	121.008	0.939917
XALKAW	109.077	109.529	101.215	174.637	74.811	109.417	118.242	72.727	108.805	73.65	2.119	2.044	2.393	2.109	2.123		174.637	118.242	0.939917
TPAUCO10	77.303	72.861	100.817	118.024	109.191	104.268	174.876	81.631	118.484	103.409	2.503	1.838	1.555	1.765	1.692		174.876	118.484	0.939867
COHDEI	87.167	85.279	93.139	122.899	117.543	95.144	179.291	82.97	117.418	96.327	2.656	1.777	1.76	1.765	1.756		179.291	122.899	0.939867
LADCOI	117.922	121.686	97.891	81.437	96.807	81.963	91.696	90.208	120.376	178.078	2.288	1.894	1.914	1.87	1.906		178.078	121.686	0.939867
TUMCUB	175.305	74.936	107.61	103.905	118.915	115.103	76.661	76.122	101.189	108.624	2.334	2.132	2.143	2.149	2.148		175.305	118.915	0.939833
BOCZAW	84.597	52.117	78.268	175.078	87.212	118.69	66.665	99.183	97.621	100.264	3.233	2.294	2.297	2.999	3.108		175.078	118.69	0.9398
LOBXIL	85.661	122.691	179.075	85.084	114.982	94.747	94.005	120.605	86.157	94.352	2.383	1.892	2.409	2.409	1.951		179.075	122.691	0.939733
XORBAI	107.542	97.931	76.305	110.516	116.348	74.798	172.729	107.477	115.584	76.253	2.193	2.257	2.272	2.303	2.429		172.729	116.348	0.939683
KEPZOU	178.063	103.078	78.622	76.761	116.059	107.982	103.302	101.907	76.404	121.684	2.236	2.274	2.048	2.057	2.032		178.063	121.684	0.93965
CAYXAC	91.5	120.579	94.611	176.95	85.821	119.015	118.781	85.666	96.606	85.788	2.246	2.055	2.29	2.252	2.246		176.95	120.579	0.939517
SIYSOI	173.396	74.09	105.224	103.709	116.083	117.025	72.456	82.871	102.102	110.688	2.343	1.791	1.771	1.775	1.786		173.396	117.025	0.939517
LEFXOJ	176.282	92.163	84.712	84.392	119.913	119.6	96.532	98.075	84.185	117.691	1.875	2.049	2.189	2.16	2.164		176.282	119.913	0.939483
PEACOB	91.509	118.176	92.879	178.111	87.161	119.46	121.743	86.622	93.488	88.341	2.173	1.617	2.056	2.189	2.178		178.111	121.743	0.939467
FIQRON	83.725	84.514	94.565	117.394	117.513	96.798	178.23	83.784	121.865	96.628	2.638	1.775	1.765	1.766	2.196		178.23	121.865	0.939417
HOVSES	92.547	120.332	91.852	177.849	89.443	121.489	118.083	89.375	88.752	88.092	1.865	2.1	2.209	1.877	1.873		177.849	121.489	0.939333
QAPLEB	86.454	84.698	121.071	93.673	97.505	119.62	85.323	177.43	117.476	92.422	1.918	2.336	1.978	2.471	2.488		177.43	121.071	0.939317
TAFVIF01	85.227	86.523	93.66	119.425	116.187	94.318	178.853	84.505	122.496	95.813	2.532	1.795	1.817	1.787	1.81		178.853	122.496	0.939283
PAJQID	94.044	122.309	90.685	178.663	87.046	120.861	116.356	87.284	92.101	88.87	2.536	2.063	2.016	2.555	2.517		178.663	122.309	0.939233
VERCUS	84.258	176.626	117.56	118.91	97.855	94.484	82.579	85.094	95.687	120.272	2.564	1.781	1.792	1.794	1.811		176.626	120.272	0.939233
YAZBUW	91.787	122.535	94.031	178.879	87.126	119.283	117.602	88.429	91.831	86.841	2.565	2.589	2.535	2.564	2.564		178.879	122.535	0.939067
BOFHAG	123.657	180	92.262	92.276	56.352	56.361	123.639	123.648	56.343	92.248	2.385	2.672	2.672	2.961	2.673		180	123.657	0.93905
IWULER	87.065	86.451	93.407	119.359	117.131	92.905	179.341	89.503	123.007	90.666	1.732	1.919	1.962	1.898	1.882		179.341	123.007	0.9389
DETBOU	104.046	87.222	73.648	119.361	119.6	96.814	175.932	96.921	117.683	81.547	2.035	1.973	2.042	2.031	2.209		175.932	119.6	0.938867
WABJUF	57.01	179.049	97.438	91.079	122.718	121.573	58.379	58.133	122.239	94.243	2.59	3.032	2.98	2.299	2.947		179.049	122.718	0.93885
AMICIK	103.099	97.073	81.382	118.373	119.138	81.386	175.468	95.411	116.044	81.716	2.039	2.325	2.289	2.303	2.069		175.468	119.138	0.938833
PUQQOJ	84.024	176.675	114.1	120.346	99.828	96.807	79.879	81.701	97.653	119.638	1.545	1.911	1.93	2.292	2.249		176.675	120.346	0.938817
SBPCOB	88.516	87.41	90.562	119.937	118.404	91.223	177.649	88.281	121.321	94.053	2.602	1.733	1.778	1.759	2.226		177.649	121.321	0.9388
UZOMUT	103.481	96.484	79.894	113.032	119.809	80.153	176.136	100.016	118.42	80.176	1.971	2.074	2.06	2.04	2.223		176.136	119.809	0.938783
IZITAM	86.799	120.178	87.519	177.881	93.678	117.558	121.558	94.304	87.32	90.362	2.237	2.131	2.358	2.24	2.227		177.881	121.558	0.938717
AWESAY	179.017	101.625	80.819	80.017	118.306	110.189	99.029	99.282	79.329	122.7	2.27	2.163	2.01	2.046	2.048		179.017	122.7	0.938617
WEYJIV	177.407	98.331	84.019	84.445	119.169	116.645	93.812	95.497	83.935	121.092	2.066	2.238	1.966	2.001	1.896		177.407	121.092	0.938583
JATCAI	84.758	93.241	85.966	84.315	95.156	96.662	120.659	120.958	177.269	116.133	2.438	1.911	2.408	1.911	2.409		177.269	120.958	0.938517
ZENCUQ	87.402	119.383	86.116	177.002	92.888	120.697	118.796	95.577	85.925	92.136	1.765	2.654	2.135	1.77	1.77		177.002	120.697	0.938417
PIMKUT	102.573	102.366	77.079	119.004	105.852	77.986	179.612	99.346	123.307	80.697	2.353	2.054	2.113	2.07	2.322		179.612	123.307	0.938417
QIYVEZ	103.683	111.51	72.625	119.567	101.959	72.067	175.87	105.821	114.164	74.955	2.372	2.199	2.164	2.105	2.483		175.87	119.567	0.938383
FOKYOT01	86.447	84.865	120.192	95.422	93.639	121.69	83.944	177.99	115.916	95.729	2.609	1.783	1.808	1.798	1.787		177.99	121.69	0.938333
AMIQUK	177.079	80.908	96.094	101.688	120.789	113.72	82.419	81.233	97.453	119.049	2.043	2.021	2.305	2.331	2.327		177.079	120.789	0.938167
AYEBUD	77.735	117.951	78.821	174.666	98.1	118.38	116.187	97.2	85.866	102.22	1.787	1.476	1.764	1.77	1.763		174.666	118.38	0.9381
AJUJOE	90.612	90.568	122.584	88.842	90.568	118.708	88.842	178.865	118.708	90.612	2.211	1.776	2.211	1.769	1.776		178.865	122.584	0.938017
UKEHOI	177.358	95.359	85.499	85.442	119.189	121.078	94.85	96.716	82.236	116.876	2.185	2.436	2.031	2.038	1.992		177.358	121.078	0.938
COLPUP	119.565	119.565	99.931	78.634	99.931	78.634	91.429	91.429	120.87	177.141	1.993	2.087	1.951	2.087	1.951		177.141	120.87	0.93785
VOMLOY	84.282	117.523	84.396	176.294	97.838	119.424	120.026	97.732	83.913	91.9	2.409	2.197	2.256	2.399	2.376		176.294	120.026	0.9378
GUHTUA	84.465	84.05	96.522	119.917	115.791	93.972	178.019	85.59	121.751	95.379	1.903	2.416	2.392	2.419	1.951		178.019	121.751	0.9378
FUFFES	81.956	116.563	81.233	176.141	95.258	119.816	119.873	99.108	87.535	95.052	1.589	1.735	1.715	1.766	1.682		176.141	119.873	0.9378
QAVQOU	99.252	110.631	178.376	98.782	120.111	79.715	81.888	122.109	98.777	81.525	2.077	1.933	2.013	2.14	2.043		178.376	122.109	0.937783
EHIDUU	97.709	97.132	83.716	116.097	122.251	81.83	178.514	98.398	116.277	81.312	1.946	2.015	2.043	2.053	2.058		178.514	122.251	0.937717
PAGVIC	175.735	96.73	85.429	84.576	119.473	117.51	98.486	94.934	79.885	118.983	1.736	2.815	1.781	1.78	1.781		175.735	119.473	0.9377
QAWWAM	177.023	78.804	100.937	98.435	118.387	120.761	76.199	81.921	103.527	110	2.483	1.8	1.652	2.175	1.848		177.023	120.761	0.9377
BOXVAN	108.572	98.702	77.341	110.523	116.995	77.225	174	101.891	117.738	76.442	2.053	2.143	2.171	2.178	2.329		174	117.738	0.9377
LEFXID	178.252	94.394	85.535	86.154	117.748	121.992	92.784	94.251	86.914	118.953	1.99	1.996	2.159	2.124	2.096		178.252	121.992	0.937667
XAVXOI	89.257	121.203	177.462	92.059	121.203	88.731	92.059	117.594	88.731	89.257	2.048	1.991	2.048	2.048	1.991		177.462	121.203	0.93765
JEVZUF	99.402	99.599	79.916	121.654	112.035	79.029	177.912	101.851	116.92	80.155	2.234	2.011	2.021	2.062	2.167		177.912	121.654	0.937633
PEDHEM	85.869	81.672	96.09	121.31	120.596	96.172	177.566	84.6	114.916	95.577	2.019	2.029	2.065	2.134	1.955		177.566	121.31	0.9376
VEDMUO	90.145	177.695	121.443	118.553	87.865	91.206	87.158	91.545	92.095	119.99	2.444	1.943	1.96	2.431	1.961		177.695	121.443	0.937533
MIGJOD	120.795	80.39	100.278	108.335	78.015	177.043	99.355	119.504	77.432	104.583	1.982	2.059	2.047	2.299	2.037		177.043	120.795	0.937467
GOCCUW	179.324	86.964	93.274	92.062	123.077	114.978	87.368	87.421	92.955	121.26	2.54	1.752	1.778	1.785	1.777		179.324	123.077	0.93745
YUZNOX	98.827	98.672	80.928	116.218	113.473	80.314	178.57	101.014	122.327	80.339	1.914	2.051	2.036	2.06	2.209		178.57	122.327	0.937383
OZUGAT	84.456	85.447	121.707	94.122	96.515	119.434	84.251	177.95	116.333	95.27	1.925	2.407	1.97	2.44	2.4		177.95	121.707	0.937383
MOJKAY	95.946	99.701	80.781	120.355	113.224	81.194	176.594	101.615	119.154	80.953	2.034	2.071	2.074	2.073	2.277		176.594	120.355	0.937317
HEMCOR	95.95	87.204	122.475	85.194	92.78	119.256	83.642	178.713	118.164	95.249	1.996	1.78	1.785	1.813	1.813		178.713	122.475	0.9373
KUHYET	94.018	96.85	82.378	118.185	116.921	81.978	175.015	104.01	118.777	80.784	1.956	2.048	2.123	2.086	2.028		175.015	118.777	0.9373
UGIXUE	84.676	99.085	85.517	85.424	93.159	92.065	119.622	119.955	176.192	118.348	2.456	1.906	2.413	2.006	2.418		176.192	119.955	0.937283
QASGUM	100.962	103.292	78.217	109.2	117.654	78.769	177.88	99.676	121.644	78.825	1.813	2.063	2.07	2.036	2.28		177.88	121.644	0.937267
JOLWEM	89.87	178.441	122.206	121.991	88.959	89.241	91.763	91.68	88.586	115.697	1.814	1.791	1.797	1.791	1.799		178.441	122.206	0.93725
EQEZIK	97.8	120.501	98.487	179.338	82.033	110.706	123.104	81.974	97.563	82.153	2.036	1.948	2.013	2.063	2.068		179.338	123.104	0.937233
XUKTAA	176.431	74.193	96.134	104.564	114.607	120.198	80.477	75.726	108.669	109.883	3.173	2.61	2.497	2.455	2.586		176.431	120.198	0.937217
IKOKUP	89.982	90.209	89.417	119.748	117.669	89.235	178.795	91.171	122.565	90.034	2.041	2.207	2.199	2.205	2.326		178.795	122.565	0.937167
QENNOP	82.396	77.924	94.598	120.385	113.729	102.337	176.613	83.956	119.356	98.954	1.391	1.755	1.762	2.203	2.193		176.613	120.385	0.937133
CUQQUB	88.526	88.526	88.315	93.197	88.315	93.197	120.826	120.826	177.052	118.349	1.79	1.813	1.783	1.813	1.783		177.052	120.826	0.9371
FEMCEI	117.886	121.068	80.717	100.369	81.414	100.186	88.387	88.914	121.045	177.292	2.117	2.049	1.987	2.04	1.987		177.292	121.068	0.937067
ASAQAN	94.599	94.334	83.58	119.74	117.478	83.463	175.964	100.007	119.203	84.017	1.572	2.319	2.317	2.318	2.312		175.964	119.74	0.937067
FEQJAN	80.864	78.998	114.426	95.259	105.253	119.038	77.159	175.262	115.832	102.18	2.865	1.878	2.386	2.319	2.306		175.262	119.038	0.937067
IBUTUU	97.744	113.128	99.199	177.175	80.315	117.778	120.953	79.676	101.845	81.265	2.007	1.898	2.218	2.032	2.063		177.175	120.953	0.937033
OYIYIF	97.204	89.868	81.615	120.981	118.196	92.917	177.2	82.334	120.822	96.076	2.413	1.921	1.918	2.417	2.429		177.2	120.981	0.936983
OSAXIQ	86.784	119.97	176.279	91.357	119.97	91.86	91.357	120.061	91.86	86.784	1.963	2.2	1.963	1.959	2.2		176.279	120.061	0.936967
YACLET01	176.842	96.077	86.564	87.846	120.612	120.631	93.41	94.98	81.244	116.643	1.75	2.843	1.786	1.775	1.788		176.842	120.631	0.93685
KAGJEH	91.088	177.764	121.554	121.442	92.175	92.173	86.791	90.061	87.765	116.965	2.333	1.738	1.779	1.745	1.778		177.764	121.554	0.936833
GALLEK	84.097	120.792	87.156	176.998	95.534	116.677	120.636	93.083	85.062	95.186	2.471	1.894	1.932	2.416	2.372		176.998	120.792	0.936767
LIRCEU	177.47	91.494	89.526	82.266	118.348	121.271	92.741	95.632	88.285	119.412	1.962	2.237	2.09	1.919	1.909		177.47	121.271	0.93665
TOCFIC	61.189	57.982	76.144	87.734	98.161	176.798	120.607	57.779	100.83	82.854	2.694	2.84	2.928	2.817	2.64		176.798	120.607	0.936517
BAYJAN	99.67	97.272	119.467	80.464	79.323	119.93	89.104	176.119	118.043	94.207	2.42	2.144	2.277	2.182	2.354		176.119	119.93	0.936483
VARDIC01	123.478	113.486	84.25	95.794	94.861	84.834	85.91	94.339	120.754	179.666	2.426	2.375	1.923	2.431	1.902		179.666	123.478	0.936467
TAGGAL	94.514	179.081	122.896	117.605	85.017	85.051	95.71	95.082	84.635	117.149	2.164	2.158	2.142	2.122	2.154		179.081	122.896	0.936417
BAMDEZ	123.453	88.53	88.301	122.625	90.978	179.636	91.114	113.9	91.833	89.234	2.03	1.984	1.98	2.147	2.194		179.636	123.453	0.936383
TUBBOH	122.494	89.637	115.011	90.328	178.675	90.384	122.494	89.038	90.384	90.328	2.709	2.761	2.347	2.334	2.761		178.675	122.494	0.93635
PALXIL	108.824	116.507	98.458	172.685	74.067	110.896	111.409	74.552	109.191	74.228	2.03	2.027	2.489	2.033	2.059		172.685	116.507	0.9363
LIHQAV	177.789	94.947	91.303	94.192	120.377	118	88.431	87.815	83.24	121.611	2.383	2.401	2.219	2.214	2.196		177.789	121.611	0.9363
GEVQIJ	100.855	99.192	81.022	113.834	116.923	81.234	177.41	98.362	121.237	79.204	1.846	2.045	2.071	2.028	2.029		177.41	121.237	0.936217
PANCUD	102.108	103.688	79.579	112.979	119.602	78.787	175.775	97.589	116.439	78.19	2.381	2.07	2.09	2.07	2.344		175.775	119.602	0.936217
LOBXIL	84.909	121.529	84.562	179.01	95.977	113.211	122.837	94.482	85.008	95.127	2.384	1.894	1.952	2.405	2.426		179.01	122.837	0.936217
KUDJEY	84.549	85.298	93.54	118.749	117.503	94.873	177.839	85.78	121.669	96.038	2.574	1.699	1.794	1.776	2.196		177.839	121.669	0.936167
ZUBZIF01	99.371	99.967	81.272	116.553	113.169	80.458	178.825	98.321	122.655	80.507	2.377	2.05	2.107	2.065	2.039		178.825	122.655	0.936167
YOSPIH	91.32	90.823	86.946	118.926	119.427	88.863	177.748	90.471	121.578	91.626	2.179	2.056	2.071	2.045	2.155		177.748	121.578	0.936167
XUGLER	80.743	79.151	122.484	99.884	101.564	110.018	77.967	178.645	117.364	100.693	2.206	1.941	1.992	2.044	2.058		178.645	122.484	0.936017
PALXOR	172.857	74.315	108.54	98.208	110.101	116.698	74.578	74.654	109.044	112.591	2.466	2.023	2.067	2.032	2.04		172.857	116.698	0.935983
PPTCFF01	85.511	89.949	91.901	119.262	119.612	90.496	177.21	91.9	121.054	90.275	2.145	1.773	1.78	1.793	2.154		177.21	121.054	0.935933
XALJUP	177.944	86.212	93.465	92.187	120.108	116.893	86.939	85.891	95.394	121.789	2.307	1.778	1.775	1.77	1.775		177.944	121.789	0.935917
ADAPIG01	111.226	112.969	172.212	99.083	114.157	76.44	76.374	116.058	101.33	75.412	2.046	2.015	2.083	2.074	2.363		172.212	116.058	0.9359
HINJIY	111.651	108.9	172.831	98.819	116.678	75.315	74.617	114.898	105.029	74.932	1.994	1.98	2.006	2.009	2.46		172.831	116.678	0.935883
XOGRAM	83.268	85.685	95.287	120.122	119.215	98.028	176.27	82.585	117.241	95.227	2.341	1.785	1.778	1.784	1.823		176.27	120.122	0.9358
RUBCEY	99.806	122.31	178.455	98.918	112.583	81.295	81.402	118.385	97.225	81.291	2.031	1.954	2.071	2.059	2.01		178.455	122.31	0.93575
COHDEI	82.959	177.303	121.16	117.031	97.551	94.515	85.8	84.614	94.602	119.048	2.668	1.768	1.744	1.738	1.753		177.303	121.16	0.935717
XUNQAA	97.568	105.899	79.091	119.648	110.813	78.036	175.791	101.518	117.77	78.159	2.034	2.126	2.109	2.102	2.268		175.791	119.648	0.935717
DESJOD	92.366	95.094	84.534	120.758	118.899	86.273	176.896	95.638	118.624	86.114	2.437	2.371	2.422	2.433	1.989		176.896	120.758	0.935633
SAGNUM	89.639	122.826	90.462	178.954	89.785	119.622	117.552	89.611	90.009	90.531	1.928	2.326	2.327	1.9	1.912		178.954	122.826	0.935467
LIBDEI	178.96	92.833	88.114	88.362	118.144	118.537	92.916	91.202	86.542	122.835	2.109	2.192	1.995	1.957	1.976		178.96	122.835	0.935417
ODUREN	87.858	178.343	116.693	122.218	99.177	92.541	86.463	82.468	91.411	119.306	2.256	1.792	1.829	1.849	1.823		178.343	122.218	0.935417
GUWQIA	90.453	122.209	91.212	178.333	89.6	122.093	115.689	89.085	89.29	90.431	1.922	2.349	2.352	1.922	2.015		178.333	122.209	0.9354
FOJYOS	82.854	84.732	94.254	119.202	120.322	94.862	176.445	87.057	118.127	96.179	2.768	1.7	1.746	1.77	1.764		176.445	120.322	0.935383
KARXOR	109.474	111.672	173.48	102.975	117.357	77.153	76.514	115.264	97.872	76.046	2.022	1.95	2.092	2.075	2.307		173.48	117.357	0.935383
YACLET	177.204	95.684	86.3	87.613	121.083	120.148	93.685	94.883	81.928	116.72	1.74	2.844	1.773	1.765	1.771		177.204	121.083	0.93535
EKEHIN	83.655	84.737	96.882	122.461	121.574	96.246	178.582	84.188	112.914	94.421	1.885	2.43	2.368	2.417	1.915		178.582	122.461	0.93535
SINWUI	102.6	99.201	78.123	108.306	120.281	77.442	176.402	104.668	118.577	78.315	2.278	2.054	2.058	2.079	2.276		176.402	120.281	0.93535
ZIHZOI	83.445	119.069	82.235	175.186	97.94	116.269	117.484	98.01	77.385	101.039	1.864	2.319	1.785	1.839	1.839		175.186	119.069	0.935283
JUWPEY	178.499	82.234	97.833	99.313	118.341	122.382	80.702	81.601	98.33	112.845	2.471	2.12	2.121	2.101	2.13		178.499	122.382	0.935283
WEZKAN	178.956	84.453	93.432	93.301	120.153	115.597	85.87	87.73	95.158	122.842	2.595	1.763	1.752	1.77	1.806		178.956	122.842	0.935233
TAVVIY	81.417	81.757	99.29	122.808	116.834	98.662	178.922	81.692	114.072	97.235	2.274	2.412	2.411	2.407	2.383		178.922	122.808	0.935233
CLFESN	84.909	176.349	117.587	117.823	95.209	98.221	83.019	81.22	97.493	120.235	2.679	1.753	1.732	1.8	1.758		176.349	120.235	0.935233
FOKYOT01	178.112	84.17	95.924	93.081	119.672	122.004	85.136	87.827	93.943	116.635	2.607	1.817	1.795	1.79	1.799		178.112	122.004	0.935133
WICHUL	176.407	84.965	92.243	94.4	119.101	120.301	85.914	89.192	93.325	119.602	2.461	1.763	1.754	1.778	1.742		176.407	120.301	0.9351
ORUWAA	85.693	85.949	116.602	92.859	94.512	119.323	85.414	178.501	122.396	95.592	1.944	2.037	1.936	2.019	2.005		178.501	122.396	0.935083
REDDAH	177.284	97.615	83.382	82.486	115.402	121.179	93.948	99.298	83.396	119.139	2.31	2.256	1.767	1.762	2.293		177.284	121.179	0.935083
IBIQIW	100.131	115.215	100.206	178.559	80.045	122.456	114.043	81.02	98.652	80.05	2.262	2.022	2.292	2.272	2.267		178.559	122.456	0.93505
SEBBAF	78.374	103.432	81.849	92.324	87.743	96.396	120.146	114.885	177.975	121.872	2.073	2.22	2.026	2.025	1.987		177.975	121.872	0.93505
PIVHAD	84.194	121.924	178.027	84.837	116.142	94.567	94.912	119.19	84.439	97.133	2.4	1.929	2.411	2.423	2.038		178.027	121.924	0.93505
KUHPAG	86.349	84.105	97.15	115.982	120.36	94.461	176.474	81.427	120.373	96.581	2.104	2.295	2.282	2.3	2.33		176.474	120.373	0.935017
QAPLEB	175.924	85.818	95.811	91.385	119.826	118.578	86.278	84.539	96.21	119.801	1.916	1.959	2.514	2.425	2.418		175.924	119.826	0.934967
IVAQAY	178.374	94.221	86.526	86.057	116.372	120.305	93.313	92.668	87.253	122.28	2.293	2.053	2.103	2.092	2.077		178.374	122.28	0.9349
FAKTET	104.399	118.008	174.101	96.621	113.508	77.649	78.257	115.453	105.264	77.485	2.043	1.987	2.017	2.035	2.249		174.101	118.008	0.934883
TCAPFE10	178.095	88.541	90.768	91.891	120.621	122.005	88.903	89.926	90.043	117.303	2.245	1.792	1.78	1.789	1.791		178.095	122.005	0.934833
HUBNEY	100.024	97.974	82.365	121.095	117.849	82.247	177.185	95.706	115.492	81.742	2.042	2.151	2.17	2.148	2.184		177.185	121.095	0.934833
UZIMOH	179.29	95.122	83.515	84.112	123.2	116.255	95.971	95.706	85.548	117.723	2.376	2.321	1.91	1.904	1.925		179.29	123.2	0.934833
MIDJOA	94.723	115.29	177.846	96.506	120.126	84.328	83.415	121.757	95.523	85.411	2.227	2.261	2.074	2.061	2.028		177.846	121.757	0.934817
RABVAS	81.188	117.052	88.113	176.586	95.288	120.107	120.503	95.556	85.34	94.455	2.161	2.082	2.223	2.191	2.219		176.586	120.503	0.934717
OYAVAN02	101.536	91.284	120.566	78.685	89.428	111.959	98.173	178.971	122.888	80.869	2.021	2.07	2.242	2.015	1.97		178.971	122.888	0.934717
HAGKEI	93.165	119.642	175.725	99.325	119.412	80.97	83.071	114.501	102.725	80.496	2.001	1.969	2.046	2.039	2.18		175.725	119.642	0.934717
XITKAN	65.162	62.554	122.581	113.5	118.466	54.853	62.977	178.66	116.8	118.262	2.606	2.757	2.31	2.861	2.78		178.66	122.581	0.93465
FENPAS	91.278	91.278	96.732	82.006	96.732	82.006	119.317	119.317	177.444	121.365	2.712	1.989	2.065	1.989	2.065		177.444	121.365	0.93465
AMOZOR	92.375	118.201	94.086	177.106	85.128	118.818	121.027	85.384	97.557	85.523	2.237	1.96	2.206	2.239	2.235		177.106	121.027	0.93465
UNIXUK	175.339	81.014	96.538	103.152	119.26	116.656	79.954	81.236	97.981	116.469	2.009	1.936	2.07	2.051	2.18		175.339	119.26	0.93465
WIGMOO01	83.726	178.718	119.906	114.375	96.3	94.976	83.909	84.845	96.306	122.641	1.917	2.436	2.378	2.246	2.396		178.718	122.641	0.934617
XUNTOQ	101.456	96.854	81.655	111.791	120.693	81.196	176.875	97.828	120.8	81.173	2.32	2.253	2.241	2.243	2.361		176.875	120.8	0.934583
RIYYAB	80.589	105.474	113.288	97.983	92.641	74.113	104.455	53.72	169.359	50.917	3.128	2.329	3.087	2.3	3.213		169.359	113.288	0.934517
POTLOA	175.357	79.239	97.059	101.488	113.365	119.286	78.387	80.003	103.998	117.033	2.357	2.014	2.413	2.402	2.418		175.357	119.286	0.934517
OWURAA	89.627	116.09	89.518	178.413	90.822	121.562	122.348	89.131	90.612	90.311	2.43	1.803	1.828	1.752	1.769		178.413	122.348	0.934417
GASDEJ	89.689	80.162	91.554	118.684	122.65	99.522	178.712	99	118.652	80.105	1.982	2.375	2.088	2.079	1.994		178.712	122.65	0.934367
JINPAY	108.226	113.567	111.975	170.7	73.53	114.639	110.209	74.089	97.493	74.77	2.064	2.187	2.498	2.071	2.081		170.7	114.639	0.93435
CUNHUQ	85.425	119.132	84.208	179.113	96.464	115.235	123.06	94.561	84.312	95.062	2.391	1.922	2.021	2.414	2.393		179.113	123.06	0.934217
POVPOG	117.2	121.762	84.936	95.101	97.824	84.193	69.739	108.372	110.809	177.815	2.141	2.072	2.087	2.056	2.423		177.815	121.762	0.934217
LIVFUR	87.658	87.669	92.397	123.673	117.591	92.064	179.721	87.895	118.273	92.302	2.255	1.793	1.776	1.812	1.782		179.721	123.673	0.934133
QALZOT01	102.157	101.781	116.122	79.108	78.246	122.567	100.614	178.613	109.632	78.262	2.274	2.131	2.205	1.977	2.036		178.613	122.567	0.9341
QUNKAL	84.737	84.26	116.795	95.884	93.237	119.663	86.144	177.36	121.316	95.843	2.247	1.752	1.771	1.749	1.764		177.36	121.316	0.934067
VEBDEM	119.949	86.332	93.639	122.074	90.803	178.118	91.876	117.603	86.766	90.538	2.204	1.878	1.74	1.985	2.208		178.118	122.074	0.934067
DATVEZ	179.163	86.53	91.778	92.376	123.125	116.568	87.961	87.063	94.297	119.583	2.492	1.751	1.754	1.756	1.768		179.163	123.125	0.933967
TAFVIF	86.243	178.598	116.182	122.564	93.552	95.954	84.468	85.079	94.758	119.234	2.534	1.792	1.794	1.802	1.804		178.598	122.564	0.9339
FIDLAG	99.404	177.945	112.48	121.912	82.944	81.549	96.526	97.46	82.042	120.148	2.224	2.069	2.016	1.991	2.076		177.945	121.912	0.933883
VEZCEL	175.393	63.868	112.111	119.366	95.131	107.713	64.536	65.114	115.521	105.21	3.453	1.965	2.058	2.128	2.095		175.393	119.366	0.933783
NIDBEH	101.952	112.976	177.449	95.426	121.423	81.401	79.153	118.218	100.185	82.032	2.04	1.931	2.173	2.136	2.201		177.449	121.423	0.933767
CEGDIB	86.97	117.495	86.998	177.122	93.423	120.696	121.096	90.17	87.619	94.763	2.374	2.066	1.967	2.402	2.422		177.122	121.096	0.933767
COMARC	89.866	86.992	88.462	119.472	121.105	91.787	177.13	88.264	119.181	94.59	2.373	1.742	1.789	1.758	2.395		177.13	121.105	0.93375
WEMDUQ	114.794	82.082	101.994	116.232	78.508	174.906	102.688	118.882	77.307	97.456	1.956	2.049	2.036	2.246	2.019		174.906	118.882	0.933733
WECDEN	94.215	94.004	86.292	123.362	117.405	86.062	179.385	93.316	117.896	86.113	2.364	2.056	2.06	2.08	2.068		179.385	123.362	0.933717
PALXAD	172.484	75.636	108.024	97.002	114.026	116.462	75.351	75.482	107.963	111.321	2.367	2.049	2.073	2.069	2.041		172.484	116.462	0.9337
UDAMIV	176.434	92.83	92.398	88.863	119.959	120.412	87.464	88.108	90.313	119.604	2.24	1.77	1.77	1.783	1.779		176.434	120.412	0.9337
KADNEK	84.62	122.665	178.681	83.629	113.285	94.944	95.648	120.846	83.832	97.323	2.359	1.916	2.397	2.414	1.991		178.681	122.665	0.9336
OBIVIF	179.115	97.286	84.111	84.237	123.1	115.859	96.277	94.879	83.246	117.645	2.009	2.038	2.053	2.11	2.098		179.115	123.1	0.933583
BEHTIU	82.234	81.97	99.076	116.658	121.611	99.153	177.624	82.286	116.234	95.348	2.235	2.394	2.413	2.411	2.402		177.624	121.611	0.93355
RALZUB	176.643	80.441	99.561	100.837	114.078	120.631	81.892	81.012	96.229	118.272	2.099	1.947	2.063	2.071	2.047		176.643	120.631	0.933533
WUMFEP	174.898	80.84	102.219	94.405	118.886	117.537	80.545	80.511	101.42	115.788	2.214	2.027	2.103	2.095	2.086		174.898	118.886	0.933533
CUHZUA	90.221	91.251	88.503	122.002	116.837	88.102	178.01	90.74	121.112	91.231	2.206	1.845	1.765	1.74	1.747		178.01	122.002	0.933467
PIXPAN	99.956	101.233	80.202	123.662	108.505	78.436	179.668	100.078	118.187	80.061	2.245	2.018	2.05	2.078	2.144		179.668	123.662	0.933433
IBIBOL	118.428	121.587	100.831	79.835	78.169	103.669	96.572	81.101	110.612	177.593	2.502	2.106	2.174	2.102	1.912		177.593	121.587	0.933433
HELMAM	102.009	102.108	79.931	116.168	120.328	79.717	176.332	95.84	114.729	80.498	1.941	2.069	2.01	2.013	2.053		176.332	120.328	0.9334
QIDYOS	106.217	175.193	111.984	119.19	78.668	79.103	96.621	101.577	77.605	117.093	1.96	2.102	2.092	2.204	2.16		175.193	119.19	0.933383
VUBPEN	87.541	83.905	96.821	119.448	119.585	93.421	175.583	80.436	117.655	97.926	2.529	1.774	1.75	1.78	1.785		175.583	119.585	0.9333
YETNIU01	103.629	99.28	79.542	115.535	120.054	81.233	176.05	96.547	115.937	79.872	1.88	2.171	2.143	2.107	1.989		176.05	120.054	0.933267
NABCAU	100.436	177.896	121.901	109.938	78.107	77.442	102.184	103.876	78.121	115.2	2.275	2.08	2.063	2.271	2.063		177.896	121.901	0.93325
IFIXUQ	121.55	78.84	102.965	108.076	75.539	177.545	103.615	114.927	75.592	103.192	1.979	2.024	2.016	2.468	1.953		177.545	121.55	0.93325
JECBID	177.368	92.932	84.231	88.661	119.14	117.93	97.787	91.709	84.616	121.376	2.188	2.678	1.766	1.78	1.754		177.368	121.376	0.9332
VIRLAK	80.913	113.752	178.309	79.252	122.324	83.264	97.44	122.256	97.734	101.387	2.036	2.216	2.067	2.036	2.18		178.309	122.324	0.933083
TIYVIG01	177.313	91.48	85.089	87.453	117.73	121.332	92.244	93.632	90.188	120.396	2.209	2.087	1.797	1.779	1.783		177.313	121.332	0.933017
GIDQES03	92.678	122.206	93.45	178.184	88.61	118.29	118.969	85.906	91.19	88.233	2.567	2.044	1.984	2.478	2.509		178.184	122.206	0.932967
RESQAI	86.359	82.003	117.61	94.978	95.052	117.453	81.899	177.044	121.067	99.766	2.529	1.787	1.857	1.803	1.801		177.044	121.067	0.93295
FOJYAG	93.439	177.302	115.669	121.326	81.353	87.994	93.439	95.949	87.994	121.326	2.246	2.215	1.959	1.959	2.215		177.302	121.326	0.932933
ELEGEH	82.665	89.313	115.794	95.729	93.76	120.951	82.665	176.927	120.951	95.729	1.952	1.778	1.817	1.72	1.778		176.927	120.951	0.932933
EMERUK	98.209	114.281	175.78	97.943	116.935	80.011	79.592	119.804	104.2	80.192	2.258	1.695	2.251	2.25	2.31		175.78	119.804	0.932933
VEFGES10	94.838	119.107	97.298	176.178	85.344	120.204	118.929	85.669	91.109	85.74	2.233	2.065	2.274	2.23	2.245		176.178	120.204	0.9329
UFEPUS	178.249	90.279	94.33	89.595	115.766	122.278	84.358	90.109	91.404	121.652	2.003	1.959	1.943	1.925	1.903		178.249	122.278	0.93285
QUKROF	117.286	96.934	119.432	56.842	176.152	92.1	106.205	86.796	120.181	87.744	1.922	1.94	2.458	2.111	2.011		176.152	120.181	0.93285
QAMKOE	178.561	75.169	106.825	103.741	112.324	122.591	74.532	75.324	104.306	105.421	2.474	1.98	2.043	2.03	2.044		178.561	122.591	0.932833
TIYVIG	178.107	91.506	88.653	85.97	116.896	122.137	89.741	93.992	90.197	120.702	2.205	2.078	1.794	1.745	1.774		178.107	122.137	0.932833
TIYVEC01	176.129	93.177	86.754	84.624	119.231	119.935	92.524	92.467	90.476	120.163	2.216	2.084	1.778	1.777	1.787		176.129	120.163	0.932767
CPETCP	87.977	122.702	90.81	178.664	90.223	121.124	116.148	90.995	89.615	90.409	2.198	2.29	2.285	2.201	2.205		178.664	122.702	0.9327
MOJKAY	94.467	100.287	80.95	118.957	114.664	81.078	175.265	102.138	119.312	81.254	2.012	2.083	2.05	2.074	2.265		175.265	119.312	0.93255
WEMCOG01	86.46	82.327	121.334	93.856	95.129	119.722	85.012	177.286	116.329	97.105	2.343	1.806	1.828	1.817	1.809		177.286	121.334	0.932533
ABEWEM	99.267	102.25	77.1	119.235	108.595	76.952	175.18	107.802	117.314	76.873	2.387	2.114	2.114	2.083	2.267		175.18	119.235	0.932417
VACJAL	98.225	100.942	81.062	121.989	117.252	81.111	177.934	97.027	114.034	81.768	1.934	2.048	2.001	2.053	2.024		177.934	121.989	0.932417
SOWDEO	98.021	115.121	112.3	171.061	72.932	111.368	110.155	73.473	109.236	73.968	2.071	2.734	2.532	2.066	2.061		171.061	115.121	0.932333
[truncated: 66,557 more rows]
