# Supplementary material for: Five-coordinate transition metal complexes and the value of τ5: observations and caveats
Source: Royal Society of Chemistry journal article supplement (doi:10.1039/d0dt02985h), 2020-01-01
Supplement: d0dt02985h2.xlsx [file d0dt02985h2.xlsx]

## Sheet: Query 1
Parameter Values for Query: 1
Refcode	ANG1 (A)	ANG10 (A)	ANG2 (A)	ANG3 (A)	ANG4 (A)	ANG5 (A)	ANG6 (A)	ANG7 (A)	ANG8 (A)	ANG9 (A)	DIST1 (D)	DIST2 (D)	DIST3 (D)	DIST4 (D)	DIST5 (D)		beta	alpha	tau
LOVLUF	110.259	179.843	109.994	108.603	69.933	69.797	108.916	109.912	70.105	109.124	2.468	2.432	2.46	2.459	2.369		179.843	110.259	1.15973
VEKFOG	75.44	104.56	113.904	113.904	104.56	180	75.44	113.904	104.56	75.44	1.314	2.375	2.375	2.375	2.564		180	113.904	1.1016
ZITYUW	96.947	118.559	118.559	83.053	83.053	96.947	96.947	83.053	118.559	180	2.168	2.19	2.19	1.889	2.19		180	118.559	1.02402
RANLIC	78.825	115.815	101.27	99.49	116.029	79.1	178.995	117.83	101.723	79.604	2.301	1.908	1.773	1.881	1.904		178.995	117.83	1.01942
GEYPAB	83.838	96.162	118.863	118.863	96.162	180	83.838	118.863	96.162	83.838	2.282	1.803	1.803	1.803	1.841		180	118.863	1.01895
HEJJIR	83.975	96.025	118.944	118.94	96.025	180	83.969	118.852	96.031	83.975	2.286	1.806	1.804	1.806	1.933		180	118.944	1.0176
GEYPAB	84.141	95.859	118.971	118.971	95.859	180	84.141	118.971	95.859	84.141	2.291	1.803	1.803	1.803	1.853		180	118.971	1.01715
WIVVIG	84.619	119.131	119.131	95.381	95.381	84.619	84.619	95.381	119.131	180	1.634	2.287	2.287	1.908	2.287		180	119.131	1.01448
AYUBEB	85.187	94.813	119.304	119.304	94.813	180	85.187	119.304	94.813	85.187	2.45	2.422	2.422	2.422	2.448		180	119.304	1.0116
XENHED	85.541	119.451	119.423	94.454	94.455	85.545	85.546	94.459	119.335	180	2.383	1.7	1.702	1.687	1.701		180	119.451	1.00915
MASFEC	86.022	119.523	119.523	93.978	93.978	86.022	86.022	93.978	119.523	180	2.406	1.728	1.728	2.296	1.728		180	119.523	1.00795
CAVJOZ	93.749	86.251	119.578	119.578	86.251	180	93.749	119.575	86.251	93.749	2.358	2.133	2.133	2.133	2.285		180	119.578	1.00703
GEYPAB	82.145	119.17	118.211	95.569	96.591	83.817	84.262	97.613	118.719	179.59	2.288	1.768	1.805	1.818	1.809		179.59	119.17	1.007
COSPHP	93.245	180	93.245	119.687	86.755	86.755	119.682	93.245	86.755	119.679	1.926	2.348	1.926	1.926	2.42		180	119.687	1.00522
HITVOV	93.127	86.873	119.705	119.705	86.873	180	93.127	119.705	86.873	93.127	2.48	2.338	2.338	2.338	2.671		180	119.705	1.00492
FEVDUG	91.965	88.035	119.883	119.883	88.035	180	91.965	119.883	88.035	91.965	2.473	2.245	2.245	2.245	2.332		180	119.883	1.00195
RIJQAF	78.835	81.286	178.471	100.081	116.635	118.381	100.198	79.352	100.23	115.834	1.969	2.528	1.959	1.94	1.987		178.471	118.381	1.0015
IKOMIF	90.919	89.081	119.974	119.974	89.081	180	90.919	119.974	89.081	90.919	2.055	2.199	2.199	2.199	2.331		180	119.974	1.00043
FODXOL	119.991	89.451	119.991	90.549	180	89.451	119.991	90.549	89.451	90.549	2.204	2.204	2.204	2.195	2.183		180	119.991	1.00015
FASSEX	119.979	90.897	119.998	89.103	180	90.897	119.95	89.103	90.897	89.103	2.152	2.151	2.151	1.737	1.741		180	119.998	1.00003
KIZKEJ	119.999	90.214	119.999	89.786	180	90.214	119.999	89.786	90.214	89.786	2.28	2.28	2.28	2.682	2.701		180	119.999	1.00002
COSPHP	90	180	90	120	90	90	120	90	90	120	1.896	2.318	1.896	1.896	2.318		180	120	1
ESELIY	90	120	120	90	90	90	90	90	120	180	2.358	1.927	1.927	2.358	1.927		180	120	1
GATMAP	90	180	90	120	90	90	120	90	90	120	2.375	2.118	2.375	2.375	2.118		180	120	1
GATMAP01	120	89.971	120	90.029	180	89.971	120	90.029	89.971	90.029	2.379	2.379	2.379	2.127	2.107		180	120	1
GATMAP02	120	90	120	90	180	90	120	90	90	90	2.377	2.377	2.377	2.12	2.12		180	120	1
JESPED	90	180	90	120	90	90	120	90	90	120	2.39	2.366	2.39	2.39	2.366		180	120	1
JESPIH	90	180	90	120	90	90	120	90	90	120	2.308	2.27	2.308	2.308	2.27		180	120	1
KUQDUW	90	90	180	90	120	120	90	90	90	120	1.835	2.176	2.176	1.835	1.835		180	120	1
MALMUI	90	120	120	90	90	90	90	90	120	180	2.429	2.539	2.539	2.429	2.539		180	120	1
KANLIV	90	119.999	119.999	90	90	90	90	90	120.002	180	2.285	2.347	2.347	2.285	2.347		180	120.002	0.999967
EVUJEL	90	120.01	119.98	90	90	90	90	90	120.01	180	2.312	2.118	2.118	2.312	2.117		180	120.01	0.999833
EVUJEL01	90	120.01	120.01	90	90	90	90	90	119.98	180	2.309	2.148	2.149	2.309	2.149		180	120.01	0.999833
WIRFOS	90.472	89.528	119.953	120.019	89.527	180	90.472	120.007	89.528	90.473	2.637	1.936	1.936	1.935	2.647		180	120.019	0.999683
HEDSOY	90.424	89.576	120.002	120.021	89.576	180	90.424	119.96	89.576	90.424	1.786	2.138	2.136	2.137	1.903		180	120.021	0.99965
ESELIY	89.418	90.582	120.031	119.987	90.582	180	89.418	119.951	90.582	89.418	2.342	1.928	1.927	1.929	2.356		180	120.031	0.999483
RIJQAF	81.214	79.117	177.255	99.292	117.294	116.339	101.479	78.895	100.025	117.057	1.978	2.518	1.935	1.934	1.983		177.255	117.294	0.99935
OZERAO	179.978	90	90.019	120	119.98	90	90	89.981	120.02	90	2.969	2.97	2.462	2.463	2.463		179.978	120.02	0.9993
GOFVOO	90	179.977	89.98	120	90	90	119.98	90.02	90	120.02	2.449	2.751	2.449	2.448	2.746		179.977	120.02	0.999283
OZERUI	179.976	89.98	90.02	120.02	119.98	90	90	90	120	90	2.703	2.708	2.374	2.374	2.375		179.976	120.02	0.999267
YEMXIA	89.979	179.976	90	120.02	90	90	119.98	90.021	90	120	2.376	2.691	2.376	2.376	2.686		179.976	120.02	0.999267
YEMXIA01	90.021	179.976	89.979	119.98	90	90	120	90	90	120.02	2.467	2.704	2.468	2.468	2.7		179.976	120.02	0.999267
KUQDUW	90	90	180	90	120.05	119.935	90	90	90	120.015	1.824	2.177	2.177	1.822	1.824		180	120.05	0.999167
IXAXAI	90	179.97	89.974	120	90	90	119.978	90.026	90	120.022	2.352	2.334	2.352	2.351	2.335		179.97	120.022	0.999133
GATMAP03	90.029	179.967	90	119.978	90	90	120.022	89.971	90	120	2.374	2.103	2.375	2.375	2.104		179.967	120.022	0.999083
XEQBIE	90	120.023	120.023	89.967	90	90	90	90.034	119.954	179.962	2.429	2.025	2.026	2.429	2.026		179.962	120.023	0.998983
KUQDUW	90	90	180	90	119.986	119.949	90	90	90	120.065	1.82	2.181	2.181	1.819	1.821		180	120.065	0.998917
GIDQES01	119.885	119.578	93.252	179.798	86.647	119.885	91.546	86.647	93.252	88.656	2.485	2.546	2.055	1.999	2.546		179.798	119.885	0.99855
GIDQES	119.897	119.549	86.597	179.634	93.22	119.897	88.723	93.22	86.597	91.643	2.483	2.543	2.004	2.057	2.543		179.634	119.897	0.995617
SASKIG	179.697	82.088	83.106	119.986	116.915	97.615	96.988	83.564	118.613	96.633	2.273	2.002	2.307	2.311	2.321		179.697	119.986	0.995183
BAPKEI	83.061	84.14	179.397	95.767	117.259	119.538	96.408	84.26	96.378	119.765	2.257	2.035	2.21	2.259	2.252		179.397	119.765	0.993867
OWEMOU	86.251	117.581	93.628	96.56	120.244	86.251	179.766	120.244	93.628	83.673	2.335	1.905	2.137	1.925	1.905		179.766	120.244	0.992033
UNOTIB	83.39	119.148	119.543	94.756	97.057	83.919	84.641	96.243	118.053	179.013	1.897	2.212	2.227	2.202	2.208		179.013	119.543	0.991167
VUHJEN	91	119.671	120.051	87.741	88.752	91	92.753	88.752	120.051	179.506	2.234	1.783	1.768	1.771	1.783		179.506	120.051	0.990917
XETBIJ	87.764	88.065	179.649	91.702	120.247	120.146	91.885	88.46	92.122	119.279	2.135	2.247	2.243	2.134	2.131		179.649	120.247	0.990033
BXNPYW	80.369	80.991	176.971	99.343	117.598	117.275	100.684	77.661	100.931	115.709	1.875	2.323	1.732	1.888	1.898		176.971	117.598	0.98955
XEMZUK	90.231	119.927	89.452	90.316	120.036	89.452	179.367	120.036	90.231	90.316	2.438	2.242	2.438	2.244	2.242		179.367	120.036	0.98885
UTOLOG	177.95	78.879	81.122	118.645	114.98	103.076	98.374	81.738	118.503	96.808	1.847	1.417	1.776	1.834	1.779		177.95	118.645	0.988417
WAGRAZ	90.236	90.606	89.159	90.606	89.159	119.888	119.888	179.529	120.225	90.236	1.78	2.196	1.776	2.196	1.776		179.529	120.225	0.9884
VILQUE	89.399	120.633	90.635	89.399	120.633	89.967	179.933	118.735	89.967	90.635	2.185	2.216	2.185	2.216	2.204		179.933	120.633	0.988333
QUNKAL	179.672	96.072	95.659	120.444	118.859	84.219	84.332	94.61	118.031	85.115	2.232	1.781	1.75	1.747	1.751		179.672	120.444	0.987133
LATJIZ	179.366	90.378	89.985	119.887	120.152	89.607	89.473	90.128	119.959	90.427	2.392	1.772	1.781	1.781	1.797		179.366	120.152	0.9869
ASUJAZ	79.552	101.411	114.498	114.861	101.193	177.565	78.617	118.379	102.897	76.404	1.363	2.082	2.09	2.086	2.119		177.565	118.379	0.986433
XITKOA	92.903	120.263	87.381	92.903	120.263	89.719	179.439	119.473	89.719	87.381	2.196	1.766	2.196	1.766	1.781		179.439	120.263	0.986267
XUDJOV	90.234	118.736	89.892	89.877	120.632	89.892	179.754	120.632	90.234	89.877	2.132	1.763	2.132	1.853	1.763		179.754	120.632	0.985367
SOMFIJ	178.915	95.826	95.31	118.361	118.905	84.106	83.794	95.936	119.821	85.038	2.338	1.815	1.789	1.795	1.79		178.915	119.821	0.9849
PEJBEL	90.183	89.583	119.744	119.744	89.583	179.53	91.851	120.463	88.619	90.183	2.37	1.801	1.789	1.801	1.772		179.53	120.463	0.98445
MURPOG	88.595	91.42	120.132	120.393	90.286	179.453	89.526	119.404	90.939	89.231	2.123	1.795	1.793	1.801	1.804		179.453	120.393	0.984333
FONTAD	91.846	179.632	87.966	120.59	90.184	87.966	118.82	90.184	91.846	120.59	1.85	1.887	1.85	1.798	1.887		179.632	120.59	0.984033
VUNPAW	179.787	94.147	93.44	120.782	118.401	85.819	86.759	93.927	119.487	85.905	2.229	1.786	1.789	1.757	1.779		179.787	120.782	0.983417
AZUDAA	116.94	118.871	95.236	177.849	78.181	116.535	98.915	82.855	103.661	81.129	2.109	1.775	1.758	1.453	2.108		177.849	118.871	0.982967
XUHCUA	89.932	120.292	89.646	90.425	119.854	89.646	179.151	119.854	89.932	90.425	2.212	2.101	2.212	2.1	2.101		179.151	120.292	0.980983
RAWQAI	89.345	90.55	120.035	119.105	89.454	179.7	91.279	120.851	89.017	90.359	2.238	1.871	1.879	1.868	2.227		179.7	120.851	0.980817
ZOTLUR01	83.307	119.862	96.127	99.487	113.933	80.827	179.126	120.29	98.903	81.379	1.583	1.76	1.758	1.755	1.747		179.126	120.29	0.9806
XUDJIP	89.218	118.342	90.976	89.811	120.829	90.976	179.622	120.829	89.218	89.811	2.125	1.767	2.125	1.836	1.767		179.622	120.829	0.979883
CEBCAN	179.339	90.811	92.629	120.496	120.559	88.722	88.006	90.941	118.753	88.894	2.247	1.771	1.791	1.788	1.794		179.339	120.559	0.979667
UKEHOI	178.863	87.367	84.673	118.417	120.142	93.735	95.015	84.897	119.736	94.301	2.187	2.419	2.019	2.032	1.992		178.863	120.142	0.978683
HENXON	93.216	87.476	120.145	120.482	86.536	179.182	92.378	118.541	86.896	93.513	2.42	2.204	2.208	2.187	2.341		179.182	120.482	0.978333
FOCXEA	86.981	119.738	93.997	93.47	119.368	88.828	178.923	120.284	90.293	86.421	2.261	1.759	1.801	1.758	1.75		178.923	120.284	0.977317
FOWHOP	82.179	80.945	82.852	98.075	99.32	120.123	116.513	178.753	117.619	96.649	2.457	2.685	2.46	2.568	2.463		178.753	120.123	0.977167
KOWNAL	179.048	93.306	95.02	117.876	120.062	85.745	85.41	94.279	120.472	86.264	2.407	1.994	2.253	2.25	2.257		179.048	120.472	0.976267
KOWNAL10	179.048	93.306	95.02	117.876	120.062	85.745	85.41	94.279	120.472	86.264	2.407	1.994	2.253	2.25	2.257		179.048	120.472	0.976267
ODUKEF	91.372	88.391	120.548	120.29	88.855	179.124	90.473	119.014	88.921	91.997	2.423	2.032	2.022	2.028	2.271		179.124	120.548	0.976267
CUTPEM10	83.69	96.48	118.832	118.841	95.964	177.838	83.059	119.289	94.988	85.811	2.491	2.321	2.314	2.328	1.745		177.838	119.289	0.975817
SIZWEE	89.947	87.803	179.412	87.326	120.894	118.316	90.636	92.311	91.986	120.79	1.801	1.823	1.806	1.806	1.783		179.412	120.894	0.9753
YIKTOB	89.724	90.817	118.858	120.723	91.417	179.218	88.769	120.344	90.476	88.796	2.647	1.779	1.782	1.799	1.76		179.218	120.723	0.974917
COSFEV	89.504	90	120.949	118.923	89.23	179.43	91.003	120.097	89.011	91.262	2.387	1.75	1.779	1.738	1.716		179.43	120.949	0.974683
GOGQIC	178.998	87.756	88.615	120.123	120.664	91.418	92.281	87.889	118.881	92.047	2.12	2.36	2.245	2.248	2.233		178.998	120.664	0.972233
FINJIV	117.997	121.001	90.049	179.321	89.557	121.001	90.049	90.301	89.764	90.301	2.229	2.229	2.27	2.275	2.206		179.321	121.001	0.972
WAGRAZ	90.531	89.67	89.794	90.531	89.67	119.491	121.019	179.339	119.491	89.794	1.778	2.201	1.778	2.201	1.782		179.339	121.019	0.972
NEDKUF	85.271	120.763	116.817	95.038	95.404	85.307	83.993	94.958	120.041	178.999	2.295	1.793	1.772	1.807	1.757		178.999	120.763	0.9706
GAJHIK	87.438	91.944	119.82	119.909	88.036	178.494	90.946	120.268	90.553	91.089	2.082	1.959	1.99	2.024	2.078		178.494	120.268	0.970433
VOZNAZ	178.925	88.515	90.05	120.522	118.705	90.477	90.145	89.606	120.74	91.205	2.306	1.776	1.779	1.774	1.767		178.925	120.74	0.96975
VOZNAZ10	178.925	88.515	90.05	120.522	118.705	90.477	90.145	89.606	120.74	91.205	2.306	1.776	1.779	1.774	1.767		178.925	120.74	0.96975
EDAVAI	82.225	83.205	82.576	94.936	99.518	118.817	118.003	176.98	118.37	97.507	1.959	2.424	1.957	1.951	1.903		176.98	118.817	0.969383
GEYPAB	82.637	118.897	119.835	98.115	96.369	84.121	83.354	95.437	117.316	177.997	2.289	1.803	1.779	1.832	1.782		177.997	119.835	0.969367
MADCUS	86.224	92.925	120.965	119.51	92.526	179.11	88.162	118.889	92.5	87.662	2.338	1.774	1.794	1.793	1.781		179.11	120.965	0.969083
CPETCP	90.341	90.822	179.524	89.649	119.26	119.319	89.184	90.625	89.384	121.389	2.182	2.287	2.274	2.187	2.2		179.524	121.389	0.968917
ZOJMEQ	120.789	118.411	89.986	178.908	90.573	120.789	89.033	90.573	89.986	89.876	2.511	2.529	2.327	2.34	2.529		178.908	120.789	0.96865
VUHZIH	118.17	120.91	90.079	179.013	90.079	120.91	90.079	90.428	88.935	90.428	2.555	2.555	2.278	2.284	2.543		179.013	120.91	0.968383
TMATBI	117.516	121.241	90.705	179.344	91.199	121.241	90.705	89.635	88.145	89.635	2.444	2.444	2.364	2.269	2.4		179.344	121.241	0.968383
ODUKEF	90.004	88.843	120.766	118.7	88.4	178.844	91.174	120.417	89.352	92.248	2.411	2.026	2.037	2.026	2.269		178.844	120.766	0.967967
CLTAMV	118.069	120.965	90.078	179.03	89.616	120.965	90.078	90.421	89.414	90.421	2.242	2.242	2.232	2.196	2.237		179.03	120.965	0.96775
PUQJOA	75.621	77.49	82.27	99.266	102.679	116.913	120.185	178.236	111.045	102.801	1.908	2.324	1.966	1.939	1.952		178.236	120.185	0.967517
YIKTOB	89.183	90.187	120.686	118.474	90.794	178.877	89.476	120.83	90.046	90.327	2.633	1.779	1.783	1.772	1.737		178.877	120.83	0.96745
DURSOZ	99.518	176.765	97.287	113.785	73.77	80.975	118.569	103.284	85.225	118.726	2.182	2.151	2.139	2.156	1.405		176.765	118.726	0.967317
MAWKOK	118.538	117.996	78.405	176.55	97.691	117.222	80.909	99.218	85.662	98.188	2.314	2.312	2.342	1.777	2.319		176.55	118.538	0.966867
YICTUB	90.124	118.058	89.333	90.528	120.971	89.333	178.944	120.971	90.124	90.528	1.896	1.789	1.896	1.801	1.789		178.944	120.971	0.966217
FOJBOV02	90.4	117.298	89.961	89.654	121.351	89.961	179.307	121.351	90.4	89.654	1.805	1.805	1.805	1.755	1.805		179.307	121.351	0.965933
QENNUV	78.834	98.732	119.195	114.299	102.665	177.125	81.229	117.6	98.759	79.9	1.432	1.776	1.771	1.775	2.268		177.125	119.195	0.9655
JARHUF	90.389	89.573	178.778	92.384	120.295	118.744	90.794	86.745	90.127	120.85	2.258	2.086	2.095	1.804	2.253		178.778	120.85	0.965467
PIFFEP	178.717	96.466	95.959	115.259	120.537	82.257	84.611	96.026	120.793	84.755	2.285	1.81	1.787	1.793	1.784		178.717	120.793	0.9654
KUSGEL	91.751	87.774	121.09	118.465	87.605	178.966	92.4	119.87	87.062	93.428	2.414	2.206	2.198	2.205	2.334		178.966	121.09	0.9646
YIQLIT	92.573	85.854	178.596	86.551	120.726	119.388	87.203	94.761	93.047	119.783	1.864	2.1	2.11	1.859	1.863		178.596	120.726	0.9645
CBFMOP	89.225	90.59	90.198	90.59	90.198	120.584	120.584	178.451	118.832	89.225	1.764	2.155	1.76	2.155	1.76		178.451	120.584	0.96445
IPUSAO	89.743	90.439	119.151	120.914	89.932	178.773	90.557	119.929	90.415	88.925	1.906	2.152	2.156	2.158	1.902		178.773	120.914	0.964317
FUZMAO	85.9	120.551	94.944	94.944	120.551	84.895	178.369	117.116	93.473	85.9	2.227	1.783	1.801	1.783	1.792		178.369	120.551	0.963633
FOJBOV03	90.395	178.923	90.162	121.115	89.462	90.162	117.769	89.462	90.395	121.115	1.804	1.811	1.804	1.801	1.811		178.923	121.115	0.963467
TAYPAK	178.526	86.616	85.96	120.729	118.432	93.573	92.686	89.703	120.235	91.49	1.789	1.912	1.777	1.765	1.768		178.526	120.729	0.963283
NESVOW	88.406	90.302	178.447	92.578	120.671	119.241	90.427	88.893	89.375	120.03	1.861	2.254	2.215	1.872	1.871		178.447	120.671	0.962933
CIQHUF	179.229	83.402	87.596	117.975	119.607	96.935	92.812	89.481	121.484	89.75	2.231	2.136	1.785	1.789	1.772		179.229	121.484	0.962417
RIJQUZ	87.909	89.215	178.514	86.8	120.776	119.586	91.855	92.041	92.177	119.632	1.889	2.166	2.157	1.867	1.832		178.514	120.776	0.9623
DONQON	86.202	120.674	92.984	86.202	120.674	90.796	178.408	118.653	90.796	92.984	2.261	2.041	2.261	2.041	2.001		178.408	120.674	0.962233
COPLIC01	83.885	95.5	121.359	117.202	96.569	179.072	83.275	118.012	96.47	84.337	2.38	1.788	1.786	1.776	1.81		179.072	121.359	0.961883
LURMEQ	90.616	90.854	89.992	88.483	90.179	119.063	120.178	178.446	120.738	89.897	1.823	1.819	1.807	1.806	1.804		178.446	120.738	0.9618
MEPRUC	91.002	89.953	120.413	120.413	89.953	178.113	88.064	119.175	90.05	91.002	2.345	1.904	1.876	1.904	2.335		178.113	120.413	0.961667
JUQZIE	88.255	89.824	120.376	120.192	90.929	178.073	88.927	119.359	91.925	90.135	1.877	2.171	2.151	2.148	1.924		178.073	120.376	0.961617
KITXUG	93.967	85.715	118.751	118.085	87.582	179.679	94.245	121.988	85.871	92.626	2.408	2.201	2.195	2.196	2.339		179.679	121.988	0.961517
XIGYET	89.347	119.179	91	89.347	119.179	89.645	179.29	121.643	89.645	91	1.976	1.952	1.976	1.952	1.955		179.29	121.643	0.960783
COPLIC	83.896	95.321	121.298	117.528	96.669	178.898	83.282	117.771	96.485	84.387	2.381	1.791	1.778	1.792	1.814		178.898	121.298	0.96
YUKYIM	119.913	119.974	89.613	177.573	89.173	119.913	95.229	89.173	89.613	87.198	1.915	2.031	2.085	2.173	2.031		177.573	119.974	0.959983
YOZRAG	118.809	89.545	90.445	89.545	90.445	90.011	90.011	122.383	179.979	118.809	2.283	2.264	2.371	2.264	2.371		179.979	122.383	0.959933
PIPQAG	91.445	89.836	120.284	118.173	93.897	178.659	85.844	121.072	93.168	85.781	1.965	1.787	1.781	1.792	1.799		178.659	121.072	0.959783
FOBWAU	120.574	90.308	118.992	92.211	178.153	91.931	120.432	91.103	88.145	86.326	2.192	1.795	1.8	1.806	1.81		178.153	120.574	0.95965
YUDYEC	88.385	90.767	120.561	121.427	91.323	178.989	90.59	117.992	89.367	89.562	1.894	1.804	1.803	1.813	1.788		178.989	121.427	0.959367
YOJMUF	179.46	93.009	90.204	121.78	116.057	87.44	89.812	91.964	121.902	87.569	2.413	1.774	1.788	1.787	1.778		179.46	121.902	0.9593
UJIMUV	89.271	91.543	178.612	88.437	120.733	118.194	91.74	90.226	88.817	121.062	2.202	2.134	2.154	2.212	2.199		178.612	121.062	0.959167
WIBTOS	90	88.475	90	90.794	89.981	120.931	118.114	178.456	120.931	90.794	2.583	2.419	2.583	2.414	2.571		178.456	120.931	0.95875
ASIJAN	82.747	118.807	116.708	98.404	98.468	78.215	84.674	97.588	118.55	176.313	2.458	1.96	1.951	1.957	1.966		176.313	118.807	0.958433
KAPMIZ	82.84	121.815	97.798	98.181	118.177	82.336	179.32	114.716	97.116	81.745	2.446	1.916	1.96	1.915	1.972		179.32	121.815	0.958417
POCANC	89.765	88.497	178.491	89.13	120.906	118.076	90.957	91.633	89.995	121.018	2.13	2.128	2.122	2.123	2.135		178.491	121.018	0.957883
KAJTOE	90.215	89.139	90.668	90.215	89.139	120.857	118.285	178.279	120.857	90.668	2.2	2.109	2.2	2.109	2.202		178.279	120.857	0.957033
RCOHPH02	82.683	78.526	178.318	97.428	116.619	115.396	96.36	81.921	103.145	120.899	2.334	1.569	1.896	2.341	2.317		178.318	120.899	0.956983
GAYNAV	86.026	92.834	178.791	93.743	119.692	118.658	95.051	86.155	86.169	121.389	2.255	2.043	2.041	2.245	2.246		178.791	121.389	0.9567
YIQLUF	89.997	92.208	179.073	93.355	118.11	120.216	89.795	87.523	87.118	121.673	2.429	2.109	2.1	1.858	1.835		179.073	121.673	0.956667
FOJBOV04	90.397	178.818	90.22	121.44	89.409	90.22	117.12	89.409	90.397	121.44	1.813	1.819	1.813	1.81	1.819		178.818	121.44	0.9563
FOJBOV05	90.395	178.828	90.216	121.458	89.414	90.216	117.083	89.414	90.395	121.458	1.812	1.819	1.812	1.808	1.819		178.828	121.458	0.956167
PPHCHN11	84.853	85.905	177.44	99.577	119.407	120.071	95.535	78.005	96.067	116.072	2.192	1.402	1.804	2.175	2.2		177.44	120.071	0.95615
WAGRAZ	90.372	90.411	178.879	90.569	121.545	119.759	90.667	89.3	88.709	118.696	1.775	2.201	2.205	1.784	1.775		178.879	121.545	0.955567
FPICOB	90.28	90.323	89.378	90.28	90.323	122.034	115.933	179.354	122.034	89.378	1.863	2.139	1.863	2.139	1.82		179.354	122.034	0.955333
ODUKOP	89.236	92.028	119.568	121.427	91.688	178.736	88.387	118.785	90.965	87.725	2.283	2.021	2.031	2.023	2.078		178.736	121.427	0.95515
QOHTIQ	178.807	92.023	93.093	118.889	118.791	87.211	86.532	93.869	121.511	87.302	1.896	2.338	2.319	2.319	2.323		178.807	121.511	0.954933
BOCQUF	179.584	91.305	92.181	120.931	116.435	88.434	87.687	92.181	122.31	88.224	2.713	1.817	2.302	2.313	2.309		179.584	122.31	0.954567
UHONOU	179.515	97.301	95.741	116.037	122.241	82.609	84.718	95.186	118.382	84.466	2.284	1.833	1.801	1.77	1.795		179.515	122.241	0.954567
LADDOJ	87.876	88.662	178.759	91.225	117.344	121.498	90.919	89.649	91.719	121.009	1.758	2.296	1.773	1.777	1.78		178.759	121.498	0.95435
ZUGYIJ	177.824	95.824	92.424	120.58	117.258	85.653	88.191	94.9	120.443	82.995	2.237	1.786	1.776	1.787	1.772		177.824	120.58	0.954067
LERCEQ	85.432	97.236	118.678	119.656	92.703	177.328	85.953	120.086	92.609	86.065	2.011	2.125	2.143	2.151	1.746		177.328	120.086	0.954033
ISAHER	179.107	89.508	92.131	117.484	120.601	90.999	88.225	90.319	121.877	88.79	2.318	1.777	1.794	1.792	1.807		179.107	121.877	0.953833
CEVTEC	121.256	117.485	90.523	178.486	90.262	121.256	89.424	90.262	90.523	89.063	2.606	2.635	2.441	2.426	2.635		178.486	121.256	0.953833
CEVTEC10	121.256	117.485	90.523	178.486	90.262	121.256	89.424	90.262	90.523	89.063	2.606	2.635	2.441	2.426	2.635		178.486	121.256	0.953833
SOPROE	90.022	90.85	120.233	121.435	88.022	178.658	90.123	118.325	90.319	90.667	2.209	1.786	1.798	1.786	1.802		178.658	121.435	0.953717
MEBDOM	93.239	95.454	177.92	87.459	120.525	117.755	85.811	91.443	86.625	120.698	2.256	2.139	2.37	2.257	2.248		177.92	120.698	0.9537
ZOJMIU	114.691	122.644	89.689	179.862	90.68	122.644	89.689	90.386	89.182	90.386	2.551	2.551	2.348	2.322	2.532		179.862	122.644	0.953633
XUDJEL	90.092	89.854	122.292	117.41	89.074	179.5	89.223	120.294	90.385	91.383	2.123	1.836	1.758	1.764	2.129		179.5	122.292	0.953467
FOKTOQ01	92.197	92.46	178.203	89.687	118.577	120.139	86.119	90.646	88.931	121.001	2.52	2.048	2.011	2.445	2.497		178.203	121.001	0.953367
BADLIC	89.192	90.672	119.821	119.782	89.955	177.558	92.579	120.397	89.605	88.012	2.222	1.787	1.796	1.785	1.786		177.558	120.397	0.952683
MAWKOK	81.259	79.545	177.222	96.867	120.13	117.515	97.973	85.848	98.522	116.934	2.311	2.351	1.768	2.318	2.314		177.222	120.13	0.951533
LIPKIE	91.079	118.254	87.872	91.022	120.873	87.872	177.957	120.873	91.079	91.022	2.933	2.039	2.933	2.062	2.039		177.957	120.873	0.9514
MXCPFE	90.647	90.782	90.622	88.287	90.385	118.304	120.011	178.704	121.643	89.295	1.802	1.979	1.82	1.773	1.801		178.704	121.643	0.951017
YAVCII	91.025	90.903	88.044	90.903	88.044	120.899	120.899	177.949	118.202	91.025	2.059	2.907	2.034	2.907	2.034		177.949	120.899	0.950833
TISCED	87.252	86.604	178.806	87.253	120.449	117.603	92.749	91.731	94.45	121.762	1.878	2.192	2.197	1.868	1.881		178.806	121.762	0.950733
MOJSEK	90.015	90.389	118.417	122.365	90.274	179.359	90.203	119.214	90.042	89.095	2.353	1.836	1.811	1.826	2.355		179.359	122.365	0.9499
ZIGBIC	90.482	92.451	178.438	86.438	120.948	117.335	90.185	92.009	88.498	121.47	2.335	2.057	2.008	2.389	2.386		178.438	121.47	0.949467
QAJFUD	92.75	177.947	94.334	120.995	89.836	89.218	119.322	88.689	85.204	119.349	1.937	2.136	1.944	1.936	2.137		177.947	120.995	0.9492
QAQBIV	81.23	98.445	115.837	118.535	95.609	177.447	83.657	120.496	98.736	82.424	2.366	1.792	1.794	1.791	1.851		177.447	120.496	0.949183
EGAFAV	119.377	121.216	88.832	178.118	90.244	119.377	94.13	90.244	88.832	87.752	2.389	2.415	2.213	2.365	2.415		178.118	121.216	0.948367
APUCAR	88.365	90.778	116.828	122.198	88.712	179.087	91.288	120.96	89.378	91.46	2.222	1.789	1.788	1.788	1.793		179.087	122.198	0.94815
TFMAPM	177.306	92.077	94.528	119.822	120.438	87.001	88.132	92.723	118.868	85.573	2.381	1.781	1.751	1.781	1.79		177.306	120.438	0.9478
QORFAF	88.591	87.98	178.86	93.846	119.476	122.03	90.376	87.067	92.16	118.089	1.951	2.508	2.009	1.988	1.974		178.86	122.03	0.947167
PHTPRE	88.671	118.821	92.644	88.708	120.59	92.644	177.417	120.59	88.671	88.708	2.392	2.029	2.392	2.024	2.029		177.417	120.59	0.947117
ELOLOH	89.427	89.814	178.964	90.737	115.699	122.146	89.538	89.814	90.737	122.146	1.761	2.182	2.191	1.842	1.842		178.964	122.146	0.946967
GAPYAX	114.677	122.659	90.341	179.47	89.382	122.659	90.341	89.945	90.088	89.945	2.551	2.551	2.254	2.245	2.53		179.47	122.659	0.94685
UWALEK	88.479	90.498	122.192	116.054	88.589	178.976	90.138	121.752	90.392	91.965	2.248	1.784	1.79	1.795	1.768		178.976	122.192	0.9464
MADCUS	87.827	93.129	118.792	121.787	92.494	178.559	87.485	118.968	91.109	87.982	2.351	1.788	1.794	1.788	1.776		178.559	121.787	0.9462
YUKDAJ	89.273	118.206	89.624	91.313	120.842	88.475	177.694	120.937	90.262	90.991	2.26	1.788	1.772	1.773	1.78		177.694	120.937	0.94595
DOPFET	87.96	179.166	86.254	119.319	94.542	91.522	122.421	85.116	94.576	117.123	1.788	2.124	1.839	1.784	1.804		179.166	122.421	0.94575
REHZEM	87.709	90.943	121.888	121.909	91.556	178.649	89.085	116.022	91.704	88.957	2.194	1.769	1.781	1.766	1.779		178.649	121.909	0.945667
WICHUL01	177.888	91.937	94.232	120.737	117.399	86.343	85.625	91.95	121.191	89.931	2.472	1.753	1.755	1.773	1.777		177.888	121.191	0.94495
RODMAY	177.393	96.058	98.684	117.472	116.592	81.913	81.034	98.197	120.707	84.201	2.09	1.762	1.836	1.839	1.819		177.393	120.707	0.944767
GIDQES02	92.799	92.899	178.735	88.623	122.052	118.98	88.203	91.576	85.938	118.437	2.513	2.052	1.999	2.48	2.566		178.735	122.052	0.944717
EZILOP	88.465	118.52	120.18	88.315	91.474	90.558	90.826	90.363	121.301	177.955	1.937	1.932	1.933	1.954	1.946		177.955	121.301	0.944233
JIJFUD	90.427	90.771	121.742	122.144	89.684	178.797	90.758	116.102	88.518	89.887	2.233	1.794	1.767	1.78	2.234		178.797	122.144	0.944217
IJIYIJ	89.855	90.524	89.634	90.524	89.634	123.064	123.064	179.709	113.872	89.855	2.259	2.033	2.233	2.033	2.233		179.709	123.064	0.944083
HEMFEK	177.622	92.236	92.966	120.98	120.978	88.296	88.849	93.87	117.208	83.874	2.65	1.739	1.785	1.719	1.771		177.622	120.98	0.944033
XOGRAM	82.682	97.226	112.699	122.634	96.315	179.258	83.489	120.373	97.22	83.108	2.355	1.784	1.771	1.792	1.802		179.258	122.634	0.943733
DTHFEC	179.386	92.797	86.33	122.764	121.939	86.598	93.834	90.624	115.296	89.785	1.789	2.288	1.738	1.773	1.788		179.386	122.764	0.9437
QEVHEF	88.641	121.212	121.859	90.502	90.065	90.729	90.307	89.826	116.928	178.467	1.829	1.796	1.778	1.797	1.775		178.467	121.859	0.943467
KAPMIZ	80.941	120.519	111.734	99.818	95.978	81.517	81.186	100.777	120.859	177.459	2.467	1.917	1.923	1.924	1.989		177.459	120.859	0.943333
REMLEA	179.492	89.572	89.822	116.162	122.898	90.794	89.688	88.624	120.901	91.474	1.769	2.231	1.772	1.791	1.763		179.492	122.898	0.943233
APUCAR	88.267	91.479	116.635	122.074	88.081	178.653	91.782	121.281	89.514	90.92	2.218	1.79	1.79	1.789	1.787		178.653	122.074	0.942983
CINVAW	89.578	91.754	117.25	120.854	89.861	178.457	90.287	121.896	88.412	90.094	2.181	2.24	2.244	2.266	2.185		178.457	121.896	0.942683
MOJSEK	89.971	90.601	117.419	122.872	91.606	179.429	90.416	119.685	89.326	88.105	2.347	1.838	1.786	1.829	2.382		179.429	122.872	0.942617
VIKGOL	177.425	84.946	80.32	119.445	115.471	96.218	97.117	84.35	120.88	97.186	2.281	2.014	2.29	2.314	2.304		177.425	120.88	0.942417
EDATAG	116.502	97.208	81.811	81.486	97.366	97.235	85.004	121.216	177.76	117.546	1.896	1.943	2.323	1.983	1.95		177.76	121.216	0.9424
NECVAV	86.03	120.779	94.384	96.955	118.88	86.478	177.319	117.49	95.568	80.521	2.327	1.768	1.787	1.764	1.775		177.319	120.779	0.942333
HOVPEN	77.366	112.011	121.457	100.792	104.685	75.862	77.205	104.125	111.374	177.964	1.576	2.261	2.254	2.309	2.26		177.964	121.457	0.941783
FOJBOV	122.935	88.214	91.225	87.646	92.717	91.462	88.775	121.604	179.433	115.412	1.837	1.828	1.786	1.828	1.807		179.433	122.935	0.941633
ZEFWAI	88.75	92.483	121.959	118.175	89.089	178.443	91.571	119.866	88.583	89.473	2.219	1.772	1.758	1.78	2.218		178.443	121.959	0.9414
YUPKAW	89.35	177.477	89.35	120.995	91.262	89.35	118.011	91.262	89.35	120.995	2.038	2.059	2.038	1.944	2.059		177.477	120.995	0.941367
EREBEK	177.169	91.19	88.734	119.85	119.458	91.19	88.734	90.082	120.691	90.082	2.608	2.608	2.353	2.361	2.318		177.169	120.691	0.9413
UTOJUK	176.457	99.382	94.224	119.471	120.003	80.667	88.925	98.598	115.583	78.403	1.541	1.79	1.804	1.803	1.812		176.457	120.003	0.9409
RIJQIN	82.989	79.575	81.417	100.077	97.317	117.702	115.095	176.883	120.445	98.762	1.944	2.45	1.926	1.928	1.965		176.883	120.445	0.940633
FUDKAQ	91.394	122.503	114.639	88.031	88.021	93.045	91.394	88.031	122.503	178.934	1.803	1.753	1.753	1.781	1.772		178.934	122.503	0.940517
FIBFIF	81.997	76.803	177.403	101.332	121.008	112.594	95.7	80.844	103.091	117.269	2.083	1.56	1.726	1.727	1.735		177.403	121.008	0.939917
PAJQID	94.044	90.685	178.663	87.046	120.861	116.356	87.284	92.101	88.87	122.309	2.536	2.063	2.016	2.555	2.517		178.663	122.309	0.939233
AYEBUD	77.735	78.821	174.666	98.1	118.38	116.187	97.2	85.866	102.22	117.951	1.787	1.476	1.764	1.77	1.763		174.666	118.38	0.9381
AJUJOE	90.612	122.584	88.842	90.568	118.708	88.842	178.865	118.708	90.612	90.568	2.211	1.776	2.211	1.769	1.776		178.865	122.584	0.938017
UKEHOI	177.358	85.499	85.442	119.189	121.078	94.85	96.716	82.236	116.876	95.359	2.185	2.436	2.031	2.038	1.992		177.358	121.078	0.938
VEDMUO	90.145	121.443	118.553	87.865	91.206	87.158	91.545	92.095	119.99	177.695	2.444	1.943	1.96	2.431	1.961		177.695	121.443	0.937533
HEMCOR	95.95	122.475	85.194	92.78	119.256	83.642	178.713	118.164	95.249	87.204	1.996	1.78	1.785	1.813	1.813		178.713	122.475	0.9373
JOLWEM	89.87	122.206	121.991	88.959	89.241	91.763	91.68	88.586	115.697	178.441	1.814	1.791	1.797	1.791	1.799		178.441	122.206	0.93725
IKOKUP	89.982	89.417	119.748	117.669	89.235	178.795	91.171	122.565	90.034	90.209	2.041	2.207	2.199	2.205	2.326		178.795	122.565	0.937167
QENNOP	82.396	94.598	120.385	113.729	102.337	176.613	83.956	119.356	98.954	77.924	1.391	1.755	1.762	2.203	2.193		176.613	120.385	0.937133
CUQQUB	88.526	88.315	93.197	88.315	93.197	120.826	120.826	177.052	118.349	88.526	1.79	1.813	1.783	1.813	1.783		177.052	120.826	0.9371
KAGJEH	91.088	121.554	121.442	92.175	92.173	86.791	90.061	87.765	116.965	177.764	2.333	1.738	1.779	1.745	1.778		177.764	121.554	0.936833
TUBBOH	122.494	115.011	90.328	178.675	90.384	122.494	89.038	90.384	90.328	89.637	2.709	2.761	2.347	2.334	2.761		178.675	122.494	0.93635
PPTCFF01	85.511	91.901	119.262	119.612	90.496	177.21	91.9	121.054	90.275	89.949	2.145	1.773	1.78	1.793	2.154		177.21	121.054	0.935933
XOGRAM	83.268	95.287	120.122	119.215	98.028	176.27	82.585	117.241	95.227	85.685	2.341	1.785	1.778	1.784	1.823		176.27	120.122	0.9358
SAGNUM	89.639	90.462	178.954	89.785	119.622	117.552	89.611	90.009	90.531	122.826	1.928	2.326	2.327	1.9	1.912		178.954	122.826	0.935467
ODUREN	87.858	116.693	122.218	99.177	92.541	86.463	82.468	91.411	119.306	178.343	2.256	1.792	1.829	1.849	1.823		178.343	122.218	0.935417
GUWQIA	90.453	91.212	178.333	89.6	122.093	115.689	89.085	89.29	90.431	122.209	1.922	2.349	2.352	1.922	2.015		178.333	122.209	0.9354
WICHUL	176.407	92.243	94.4	119.101	120.301	85.914	89.192	93.325	119.602	84.965	2.461	1.763	1.754	1.778	1.742		176.407	120.301	0.9351
KUHPAG	86.349	97.15	115.982	120.36	94.461	176.474	81.427	120.373	96.581	84.105	2.104	2.295	2.282	2.3	2.33		176.474	120.373	0.935017
TCAPFE10	178.095	90.768	91.891	120.621	122.005	88.903	89.926	90.043	117.303	88.541	2.245	1.792	1.78	1.789	1.791		178.095	122.005	0.934833
UZIMOH	179.29	83.515	84.112	123.2	116.255	95.971	95.706	85.548	117.723	95.122	2.376	2.321	1.91	1.904	1.925		179.29	123.2	0.934833
LIVFUR	87.658	92.397	123.673	117.591	92.064	179.721	87.895	118.273	92.302	87.669	2.255	1.793	1.776	1.812	1.782		179.721	123.673	0.934133
QUNKAL	84.737	116.795	95.884	93.237	119.663	86.144	177.36	121.316	95.843	84.26	2.247	1.752	1.771	1.749	1.764		177.36	121.316	0.934067
VEBDEM	119.949	93.639	122.074	90.803	178.118	91.876	117.603	86.766	90.538	86.332	2.204	1.878	1.74	1.985	2.208		178.118	122.074	0.934067
COMARC	89.866	88.462	119.472	121.105	91.787	177.13	88.264	119.181	94.59	86.992	2.373	1.742	1.789	1.758	2.395		177.13	121.105	0.93375
UDAMIV	176.434	92.398	88.863	119.959	120.412	87.464	88.108	90.313	119.604	92.83	2.24	1.77	1.77	1.783	1.779		176.434	120.412	0.9337
CUHZUA	90.221	88.503	122.002	116.837	88.102	178.01	90.74	121.112	91.231	91.251	2.206	1.845	1.765	1.74	1.747		178.01	122.002	0.933467
TIYVIG01	177.313	85.089	87.453	117.73	121.332	92.244	93.632	90.188	120.396	91.48	2.209	2.087	1.797	1.779	1.783		177.313	121.332	0.933017
GIDQES03	92.678	93.45	178.184	88.61	118.29	118.969	85.906	91.19	88.233	122.206	2.567	2.044	1.984	2.478	2.509		178.184	122.206	0.932967
ELEGEH	82.665	115.794	95.729	93.76	120.951	82.665	176.927	120.951	95.729	89.313	1.952	1.778	1.817	1.72	1.778		176.927	120.951	0.932933
TIYVIG	178.107	88.653	85.97	116.896	122.137	89.741	93.992	90.197	120.702	91.506	2.205	2.078	1.794	1.745	1.774		178.107	122.137	0.932833
TIYVEC01	176.129	86.754	84.624	119.231	119.935	92.524	92.467	90.476	120.163	93.177	2.216	2.084	1.778	1.777	1.787		176.129	120.163	0.932767
CPETCP	87.977	90.81	178.664	90.223	121.124	116.148	90.995	89.615	90.409	122.702	2.198	2.29	2.285	2.201	2.205		178.664	122.702	0.9327
MISLEF	177.84	88.05	90.332	121.915	120.06	89.822	90.342	90.466	118.013	90.919	1.77	2.377	1.784	1.794	1.785		177.84	121.915	0.932083
QEXBUT	116.376	90.655	120.787	89.162	178.581	85.015	122.668	90.759	90.217	94.247	2.239	1.792	1.799	1.802	1.814		178.581	122.668	0.931883
NIVDAY	89.775	90.683	118.789	118.243	91.577	178.627	88.351	122.738	92.562	87.087	2.237	1.756	1.779	1.798	1.793		178.627	122.738	0.931483
CLTPIR	176.873	87.576	91.724	120.86	118.153	89.679	88.404	90.403	120.986	92.214	2.344	2.325	1.987	2.038	2.37		176.873	120.986	0.93145
TIYVIG02	177.14	84.86	87.552	117.773	121.253	92.289	93.711	90.218	120.416	91.459	2.207	2.092	1.799	1.789	1.788		177.14	121.253	0.93145
DIZNEH	120.523	90.235	87.939	90.235	87.939	91.797	91.797	118.954	176.406	120.523	2.358	2.135	1.895	2.135	1.895		176.406	120.523	0.931383
FEVFAO	91.277	87.744	122.952	117.553	87.714	178.832	92.516	118.993	87.485	93.319	2.465	2.258	2.25	2.235	2.326		178.832	122.952	0.931333
FIHSUK	177.571	86.039	87.833	118.635	119.073	91.619	93.954	88.635	121.721	91.946	2.224	2.021	1.772	1.793	1.786		177.571	121.721	0.930833
KOCPID01	82.284	120.239	118.824	96.982	95.396	87.39	84.066	93.924	118.287	176.086	2.384	1.791	1.787	1.813	1.782		176.086	120.239	0.930783
TIYVOM	177.392	87.38	85.142	117.416	121.549	93.54	92.289	88.685	120.262	92.906	2.226	2.089	1.752	1.794	1.774		177.392	121.549	0.930717
MIYHUY	87.304	93.817	115.984	121.877	89.819	177.81	90.677	121.972	90.522	87.991	2.599	2.277	2.268	2.211	2.596		177.81	121.972	0.930633
KAPMIZ	80.321	119.231	97.588	100.067	111.64	80.056	177.502	121.674	99.888	82.237	2.493	1.99	1.924	1.918	1.913		177.502	121.674	0.930467
LIDWOK	92.301	178.655	88.343	118.582	89.327	88.343	122.836	89.327	92.301	118.582	2.157	2.154	2.157	2.151	2.154		178.655	122.836	0.930317
OQEJAW	86.719	85.184	177.099	85.387	121.28	118.624	91.976	97.51	93.181	120.095	2.21	2.303	2.443	2.219	2.205		177.099	121.28	0.930317
QINZAQ	88.906	121.918	120.259	92.678	91.616	87.611	89.566	89.698	117.668	177.735	2.242	1.787	1.791	1.79	1.792		177.735	121.918	0.930283
DASCOP	176.622	92.657	93.525	119.071	120.82	86.423	84.106	93.177	119.23	90.084	2.496	2.042	2.33	2.32	2.316		176.622	120.82	0.930033
BUZNOZ	178.344	92.084	91.937	122.547	115.889	86.365	89.371	87.184	121.548	92.969	2.383	2.097	2.211	2.22	2.196		178.344	122.547	0.92995
YOYLIH	92.392	88.623	178.403	89.875	119.805	122.607	89.037	90.095	90.006	117.576	2.257	2.491	2.474	2.248	2.265		178.403	122.607	0.929933
IMPCNI	112.237	90.157	123.881	90.362	179.671	90.157	123.881	89.66	89.967	89.66	2.605	2.605	1.727	2.215	2.224		179.671	123.881	0.929833
NEZSEQ	119.524	123.145	91.188	178.931	91.504	117.283	92.338	87.817	88.712	88.494	2.258	1.796	1.806	1.804	1.75		178.931	123.145	0.929767
TIYWED03	176.538	84.306	88.722	120.747	120.764	92.268	93.331	89.151	117.881	92.189	2.211	2.064	1.775	1.781	1.702		176.538	120.764	0.929567
JOVMAI	85.881	91.497	120.049	120.267	94.82	176.04	85.208	118.701	93.561	89.046	2.275	1.793	1.773	1.759	1.785		176.04	120.267	0.92955
LIPKOK01	87.334	92.937	122.368	118.969	91.834	178.138	88.222	118.427	90.079	89.655	2.511	2.717	1.967	1.927	1.984		178.138	122.368	0.9295
XUSZAM	89.481	93.202	176.622	88.209	120.862	118.71	89.411	89.599	90.128	120.376	1.764	2.213	2.197	1.79	1.779		176.622	120.862	0.929333
CUBGIP	94.895	86.897	121.606	118.28	83.223	177.35	88.518	119.532	92.207	94.188	2.117	1.773	1.777	1.765	2.006		177.35	121.606	0.929067
TIYVEC	175.883	86.724	84.296	119.157	120.017	92.501	92.615	90.83	120.155	93.057	2.215	2.083	1.777	1.778	1.788		175.883	120.155	0.9288
EDAVEM	81.93	120.982	95.043	100.598	111.654	81.342	176.686	120.253	101.441	79.888	2.478	1.983	1.931	1.906	1.913		176.686	120.982	0.9284
TIYVIG	176.281	81.559	88.856	118.477	120.577	94.737	93.317	90.08	120.018	91.533	2.21	2.099	1.8	1.814	1.796		176.281	120.577	0.9284
YIQLOZ	89.259	87.232	179.091	86.019	118.71	117.898	90.485	93.394	93.658	123.392	2.289	2.096	2.104	1.856	1.844		179.091	123.392	0.928317
CERKIV	85.258	74.859	177.317	95.757	115.628	116.419	96.968	84.301	102.751	121.621	2.318	1.604	1.887	2.312	2.303		177.317	121.621	0.928267
SUBNOS	89.364	119.436	123.805	91.063	90.435	89.422	89.436	90.283	116.727	179.493	2.215	1.8	1.79	1.785	1.787		179.493	123.805	0.928133
JEPTUW	80.987	83.284	178.503	96.153	111.39	122.834	97.621	84.132	97.964	121.017	2.285	1.731	1.899	2.297	2.299		178.503	122.834	0.927817
NEQCIV	89.548	89.249	118.307	118.694	89.455	178.652	90.702	122.991	90.403	90.691	2.166	1.787	1.778	1.786	1.794		178.652	122.991	0.927683
BORKAU	177.634	85.508	84.935	121.977	118.836	94.002	93.281	91.852	118.599	90.412	2.234	1.974	1.785	1.792	1.781		177.634	121.977	0.927617
BIFQAJ	177.356	89.713	90.202	117.675	120.526	89.432	88.12	93.122	121.709	89.467	2.249	1.79	1.784	1.798	1.782		177.356	121.709	0.92745
DIKQAQ	89.812	92.596	117.807	120.293	88.08	177.515	88.426	121.897	89.907	91.17	2.264	1.88	1.888	1.898	2.257		177.515	121.897	0.926967
OBANOW	88.837	178.188	90.088	115.083	91.376	89.707	122.326	90.317	89.78	122.584	2.122	1.803	1.804	1.812	1.818		178.188	122.584	0.926733
KELQEX	86.154	177.756	86.778	120.064	91.782	93.426	116.658	86.584	95.375	122.172	2.093	2.251	2.074	2.099	2.09		177.756	122.172	0.9264
CPETCP	90.192	90.412	178.258	89.102	115.79	122.683	91.04	89.204	89.958	121.527	2.181	2.265	2.282	2.199	2.206		178.258	122.683	0.92625
CFMAPM	177.902	92.905	93.114	117.249	119.733	88.295	87.691	92.139	122.344	85.771	2.399	1.772	1.781	1.787	1.795		177.902	122.344	0.925967
UDAMIV01	178.649	92.561	90.474	123.124	116.18	88.765	89.07	90.131	120.599	89.054	2.236	1.765	1.746	1.774	1.773		178.649	123.124	0.925417
TOJCUQ	90.16	88.568	121.544	120.531	91.258	177.064	89.134	117.916	89.276	91.677	2.202	1.789	1.769	1.784	2.206		177.064	121.544	0.925333
SITWOH	89.572	92.55	120.856	122.3	91.64	177.818	87.521	116.581	90.953	87.861	2.368	2.106	2.142	2.169	1.856		177.818	122.3	0.9253
KOWNAL	177.384	94.685	92.71	121.875	119.612	87.622	87.297	91.561	117.717	86.22	2.365	2.004	2.243	2.257	2.249		177.384	121.875	0.92515
KOWNAL10	177.384	94.685	92.71	121.875	119.612	87.622	87.297	91.561	117.717	86.22	2.365	2.004	2.243	2.257	2.249		177.384	121.875	0.92515
LURVEB	92.633	117.154	121.323	88.466	91.277	91.124	88.683	87.937	121.467	176.955	1.801	2.236	1.789	1.809	1.793		176.955	121.467	0.9248
TIYWED01	176.268	84.115	89.14	120.785	120.781	92.25	93.319	89.134	117.858	92.013	2.211	2.055	1.774	1.787	1.712		176.268	120.785	0.924717
ECATOR	87.498	88.738	120.572	119.425	94.264	176.038	89.612	119.825	91.239	88.684	2.365	1.761	1.764	1.747	1.779		176.038	120.572	0.924433
KELQEX	177.618	87.102	85.521	117.011	119.886	92.027	93.077	87.75	122.167	94.605	2.088	2.265	2.096	2.079	2.099		177.618	122.167	0.924183
DOTPAD	177.968	89.077	89.925	119.307	118.165	88.977	90.629	90.234	122.522	91.199	2.282	2.284	2.167	2.189	2.191		177.968	122.522	0.9241
BIYNIH	90.237	89.121	119.06	118.263	90.212	178.121	90.977	122.677	90.878	88.648	1.949	1.888	1.884	1.885	1.913		178.121	122.677	0.924067
HEMFEK	176.067	93.344	91.979	120.638	118.922	89.307	84.181	93.597	119.642	87.651	2.643	1.753	1.77	1.775	1.777		176.067	120.638	0.923817
JASRIF	178.937	90.824	92.582	118.201	117.991	88.14	87.792	91.944	123.52	88.755	2.222	1.796	1.795	1.785	1.801		178.937	123.52	0.923617
EGAFAV01	87.259	90.789	176.841	87.845	117.487	121.427	89.715	94.493	90.012	121.028	2.431	2.194	2.332	2.387	2.412		176.841	121.427	0.923567
OFUWUI	94.668	121.048	87.062	90.428	119.324	94.668	176.46	119.324	87.062	86.032	2.123	1.954	1.92	1.928	1.954		176.46	121.048	0.923533
VUPHOD	92.53	118.641	89.479	89.096	119.865	89.331	176.904	121.493	91.775	87.846	2.243	1.787	1.756	1.774	1.769		176.904	121.493	0.923517
COMPRU	177.569	89.273	91.89	119.451	118.309	88.789	90.384	91.231	122.181	88.397	2.309	1.937	1.937	1.929	1.927		177.569	122.181	0.923133
QURMAR	99.609	98.061	175.488	85.563	120.11	119.811	81.361	98.014	77.708	113.551	2.293	1.773	2.292	2.193	2.317		175.488	120.11	0.922967
WASZOF	178.827	92.462	89.007	114.117	123.47	88.137	89.82	88.4	122.413	92.112	1.761	2.328	1.78	1.766	1.778		178.827	123.47	0.922617
MIMFAP	84.838	93.282	115.855	120.802	89.868	178.008	85.004	122.663	95.247	91.7	1.955	1.792	1.792	1.798	1.792		178.008	122.663	0.922417
BZOXCO10	179.157	84.647	88.549	118.671	123.83	94.807	92.272	89.383	116.938	90.392	2.214	2.083	1.786	1.784	1.775		179.157	123.83	0.922117
CASFEM	87.811	95.031	119.849	117.179	95.492	177.141	88.245	121.818	90.064	83.242	2.4	1.759	1.758	1.774	1.752		177.141	121.818	0.92205
GAJHIK	94.141	86.524	118.46	122.497	94.278	177.792	89.324	119.04	88.509	87.243	2.092	2.023	2.012	1.952	2.079		177.792	122.497	0.921583
GOGLIX	99.271	81.82	118.035	117.972	83.556	176.553	94.081	121.261	88.252	93.103	2.806	2.023	2.031	2.018	2.389		176.553	121.261	0.921533
CUHZUA01	177.18	90.355	92.006	120.492	121.891	90.732	89.796	87.192	117.614	90.025	2.203	1.78	1.806	1.83	1.758		177.18	121.891	0.921483
APUBOE	88.489	90.327	123.512	117.76	90.582	178.795	89.945	118.707	90.521	90.184	2.214	1.788	1.792	1.785	1.791		178.795	123.512	0.921383
NEDKOZ	86.906	92.882	117.884	123.014	93.416	178.267	86.743	117.836	94.873	85.168	2.242	1.746	1.763	1.772	1.768		178.267	123.014	0.920883
IQITOT	178.864	91.251	90.765	117.002	119.187	87.987	88.956	92.383	123.62	88.725	2.39	1.94	1.915	1.912	1.914		178.864	123.62	0.920733
RATSOV	97.918	93.838	177.911	84.096	122.667	121.064	84	95.868	84.441	113.215	1.788	2.231	2.08	1.779	1.784		177.911	122.667	0.920733
LUBHOF	88.694	87.276	119.452	120.589	90.543	175.82	90.921	119.958	92.025	90.508	2.209	1.892	1.766	1.773	2.209		175.82	120.589	0.920517
NIQBIA	178.625	90.889	91.314	119.398	116.949	89.075	87.56	92.897	123.397	88.344	2.366	1.922	1.929	1.927	1.924		178.625	123.397	0.920467
WICHUL	178.088	92.42	94.233	122.863	116.365	86.455	85.004	91.879	120.027	90.007	2.464	1.725	1.734	1.783	1.791		178.088	122.863	0.920417
PNIMNC10	178.638	89.807	88.187	123.42	118.543	91.473	91.622	89.55	117.975	89.43	1.831	1.815	1.804	1.796	1.772		178.638	123.42	0.9203
ITESAB	89.347	89.392	120.129	119.326	89.01	175.751	93.385	120.537	90.757	88.136	1.883	2.14	2.137	2.151	1.874		175.751	120.537	0.920233
DOPFAP	178.897	87.18	88.11	119.135	123.683	91.764	92.651	88.698	116.818	91.626	2.259	1.996	1.797	1.776	1.777		178.897	123.683	0.920233
QINZAQ	87.942	123.551	117.754	92.416	91.075	87.751	87.779	93.052	118.265	178.756	2.233	1.793	1.792	1.793	1.795		178.756	123.551	0.920083
TUCTUG	174.73	97.303	95.09	117.3	119.528	87.333	80.391	96.738	119.512	83.061	2.047	2.34	2.31	2.289	2.305		174.73	119.528	0.920033
GIBKAD	177.445	88.549	89.706	121.427	116.07	93.445	87.878	96.841	122.256	83.723	2.295	1.695	1.737	1.741	1.731		177.445	122.256	0.919817
DAMYIZ	88.852	90.04	121.664	120.306	93.386	176.847	91.057	118.029	87.012	89.74	2.23	1.839	1.726	1.771	2.258		176.847	121.664	0.919717
QIRMUZ	84.819	118.06	95.997	94.621	122.883	87.823	178.066	117.126	93.327	83.448	2.054	1.748	1.964	1.757	1.601		178.066	122.883	0.919717
TPIPRF	85.246	87.073	175.226	96.37	120.046	117.629	94.902	79.435	97.057	118.964	1.76	2.202	1.734	1.741	1.761		175.226	120.046	0.919667
BZOXCO	179.047	88.648	84.463	123.913	118.931	91.911	94.595	90.33	116.723	90.076	2.211	2.109	1.772	1.771	1.777		179.047	123.913	0.9189
CAJZOC10	178.511	92.486	91.529	123.38	117.939	88.976	88.016	89.96	118.526	89.107	2.461	1.89	1.921	1.915	1.918		178.511	123.38	0.91885
CAJZOC	178.511	92.486	91.533	123.384	117.937	88.976	88.011	89.956	118.524	89.112	2.461	1.89	1.921	1.915	1.918		178.511	123.384	0.918783
IKOLAW	90.018	87.654	120.123	117.294	90.854	177.662	91.518	122.54	89.47	90.576	2.061	2.204	2.2	2.203	2.335		177.662	122.54	0.9187
TERVOE	90.229	176.874	89.212	116.886	90.081	92.52	121.756	89.76	88.075	121.352	2.1	2.204	2.103	2.1	2.217		176.874	121.756	0.918633
CUYGUY	178.944	90.75	92.877	123.839	120.119	88.194	87.593	87.359	116.034	93.166	2.162	1.788	1.802	1.77	1.789		178.944	123.839	0.918417
LUJLUX	92.433	89.388	88.031	90.171	91.636	123.097	119.778	178.187	117.125	88.261	1.784	2.256	1.81	1.788	1.798		178.187	123.097	0.918167
FERMAQ10	87.101	119.458	123.395	92.035	89.101	91.978	88.428	91.437	117.076	178.481	2.223	1.738	1.576	1.752	1.767		178.481	123.395	0.9181
FERMAQ	87.098	119.457	123.396	92.032	89.101	91.978	88.431	91.44	117.075	178.481	2.223	1.738	1.576	1.752	1.767		178.481	123.396	0.918083
VAFDIP	176.659	79.385	79.927	113.368	121.587	97.29	102.099	85.199	118.55	96.344	2.235	1.431	1.779	1.767	1.76		176.659	121.587	0.917867
QUGDUR	118.934	91.261	119.806	90.367	176.327	87.922	121.259	91.446	90.441	88.596	2.354	2.203	2.137	1.894	1.895		176.327	121.259	0.9178
WASZIZ	177.686	87.166	87.833	116.695	120.454	90.718	92.525	90.39	122.627	91.49	1.781	2.284	1.783	1.781	1.779		177.686	122.627	0.91765
RECWOM	174.033	97.092	97.238	118.981	118.888	82.552	88.13	95.282	118.298	79.772	1.949	2.186	2.169	2.169	2.153		174.033	118.981	0.917533
DIRHIX	88.879	90.762	123.332	117.694	92.368	178.376	87.946	118.812	90.929	89.192	2.219	1.784	1.808	1.784	1.792		178.376	123.332	0.9174
JIZGAB	99.78	82.848	117.799	121.24	82.536	176.272	99.899	115.423	81.066	93.919	1.961	1.773	1.79	1.77	2.071		176.272	121.24	0.9172
MIYHUY02	90.774	90.033	115.998	122.508	90.43	177.537	88.578	121.364	93.159	87.162	2.613	2.265	2.271	2.297	2.587		177.537	122.508	0.91715
SUBNOS	86.632	120.264	123.165	90.329	90.871	89.347	91.192	91.698	116.484	178.179	2.221	1.792	1.779	1.784	1.787		178.179	123.165	0.9169
DUGCAJ	91.394	88.372	117.451	119.316	91.144	178.244	91.499	123.232	90.153	87.528	2.201	1.767	1.772	1.77	2.206		178.244	123.232	0.916867
OWEMIO	87.349	118.896	94.094	94.094	118.896	90.835	177.007	122	86.172	87.349	1.93	1.937	2.138	1.937	1.927		177.007	122	0.916783
JEPTUW	83.741	80.808	175.312	96.979	118.912	120.311	93.244	87.609	97.717	117.554	2.301	1.863	1.9	2.302	2.303		175.312	120.311	0.916683
NUGLOQ	88.764	88.154	119.726	121.731	92.148	176.729	92.703	118.543	89.778	88.362	2.245	2.028	2.028	2.024	2.246		176.729	121.731	0.916633
LEJNOG	89.51	90.754	93.394	85.698	88.218	115.211	121.656	177.964	122.986	92.518	1.793	2.196	1.797	1.806	1.796		177.964	122.986	0.9163
OSUHUH	87.867	92.709	122.246	121.554	93.13	177.214	86.624	115.771	90.767	89.07	2.281	1.804	1.784	1.804	1.776		177.214	122.246	0.916133
GAFSEO	177.573	95.115	90.941	118.156	117.461	84.772	87.087	97.382	122.608	84.804	2.293	2.087	1.883	1.901	1.893		177.573	122.608	0.916083
JOWBAA	175.534	97.171	91.591	119.352	117.612	86.924	84.768	96.986	120.574	82.609	2.191	1.888	2.227	2.252	2.246		175.534	120.574	0.916
HIDWOI	95.1	86.342	120.411	119.001	87.372	175.359	84.414	120.308	91.049	95.673	1.992	1.807	1.796	1.797	1.783		175.359	120.411	0.9158
TAYMUB	178.653	92.688	88.129	123.721	113.795	88.493	90.691	92.199	122.408	87.916	2.129	1.764	1.796	1.79	1.787		178.653	123.721	0.915533
POBDUG	87.085	86.902	178.731	89.308	120.868	123.802	91.663	91.033	93.973	115.062	2.108	2.52	2.493	2.107	2.099		178.731	123.802	0.915483
LAWJEZ	89.142	92.862	178.314	92.778	118.074	118.536	89.208	88.42	87.623	123.389	2.351	1.912	1.918	2.346	2.339		178.314	123.389	0.915417
CAFTIM	92.146	89.169	177.14	89.104	122.219	119.568	90.713	89.473	89.491	118.208	1.774	1.86	1.873	1.791	1.791		177.14	122.219	0.91535
KOCPID	83.229	176.826	84.905	116.567	94.772	94.79	118.398	84.221	98.229	121.905	1.781	2.375	1.793	1.782	1.794		176.826	121.905	0.91535
KATJIY	89.84	90.732	124.387	117.391	89.864	179.306	90.336	118.22	89.017	90.211	2.14	1.747	1.709	1.951	2.13		179.306	124.387	0.915317
CIZDUL	177.325	93.844	90.009	118.064	118.743	87.142	87.364	95.032	122.41	86.659	2.039	2.178	1.785	1.793	1.802		177.325	122.41	0.91525
XAQCAT	90.776	89.62	118.873	123.776	90.885	178.684	89.578	117.35	89.132	90.047	2.203	1.762	1.806	1.751	2.204		178.684	123.776	0.915133
MIBZOM	89.236	123.055	117.243	85.742	87.331	92.046	92.882	92.732	119.53	177.96	1.881	1.877	1.889	1.952	1.858		177.96	123.055	0.915083
CIQHUF	177.453	84.76	89.511	120.763	122.56	95.426	92.685	87.256	115.945	90.511	2.221	2.12	1.781	1.768	1.786		177.453	122.56	0.914883
DEGLIL	95.779	86.759	178.327	84.694	118.067	118.054	85.537	93.713	93.538	123.444	2.205	2.385	2.378	2.2	2.192		178.327	123.444	0.914717
IDUKUP	90.111	117.374	121.141	88.461	91.895	90.832	88.05	90.785	121.473	176.353	2.569	1.795	1.791	1.764	1.779		176.353	121.473	0.914667
WACSUO	91.997	88.287	178.752	92.597	123.879	118.377	87.491	86.632	92.957	117.636	2.195	2.024	2.029	2.209	2.198		178.752	123.879	0.91455
XETCAD	89.206	88.071	119.009	118.503	88.429	176.978	92.794	122.113	87.384	94.131	2.163	1.796	1.795	1.792	1.963		176.978	122.113	0.914417
UTOKAR	176.713	94.783	93.641	120.471	114.731	83.936	84.501	98.879	121.851	84.404	1.464	2.179	1.792	1.806	1.79		176.713	121.851	0.914367
OSUHUH	87.466	92.079	118.256	121.394	93.092	176.246	85.889	119.958	91.051	90.361	2.312	1.801	1.782	1.778	1.788		176.246	121.394	0.9142
ZEDSEJ	89.223	90.037	177.07	91.325	115.572	122.195	88.075	91.075	90.442	122.232	2.57	2.083	2.33	2.555	2.556		177.07	122.232	0.913967
QUNKIT	91.766	90.046	119.26	119.26	90.046	176.293	87.359	121.471	88.934	91.766	2.198	1.683	1.789	1.683	2.183		176.293	121.471	0.9137
TADPET	92.09	118.148	84.778	87.745	119.371	90.684	176.704	121.893	89.894	94.795	1.772	1.768	1.773	1.777	1.784		176.704	121.893	0.913517
CATRAT	85.515	176.167	91.488	120.155	95.613	93.229	117.216	81.994	92.306	121.363	1.752	2.342	1.773	1.775	1.762		176.167	121.363	0.9134
PUYWAI	175.408	83.952	82.858	119.63	120.604	99.448	98.386	81.014	114.831	94.562	2.244	2.746	2.193	2.22	2.185		175.408	120.604	0.9134
TIYWON01	179.253	86.87	86.493	124.463	118.444	93.739	93.618	89.258	116.554	90.071	2.207	2.079	1.773	1.787	1.784		179.253	124.463	0.913167
MAPFFE	88.623	88.749	178.829	90.25	118.051	124.045	91.093	90.888	90.47	117.871	1.742	2.224	1.744	1.708	1.766		178.829	124.045	0.913067
FOBWAU	89.865	90.397	91.93	89.296	91.083	115.769	121.764	177.186	122.415	87.336	2.185	1.802	1.807	1.807	1.798		177.186	122.415	0.91285
EDASUZ	174.15	79.59	86.009	116.594	119.388	94.84	98.369	82.62	119.249	98.744	1.928	2.293	1.937	1.934	1.936		174.15	119.388	0.9127
BIDPAG	88.667	90.728	115.355	122.95	92.2	177.688	90.48	121.689	87.763	90.016	2.4	2.306	2.297	2.258	2.402		177.688	122.95	0.9123
AZOCCU10	91.266	88.243	177.026	89.779	122.293	119.451	91.512	89.841	89.467	118.25	2.345	2.154	2.146	2.353	2.348		177.026	122.293	0.912217
DIVZUD	122.269	92.729	115.394	88.873	176.998	87.389	122.269	88.873	92.729	89.608	2.33	1.819	1.819	2.189	2.201		176.998	122.269	0.91215
OTPFEC10	91.018	89.256	89.776	89.256	89.776	118.378	118.378	177.964	123.245	91.018	2.055	1.811	2.166	1.811	2.166		177.964	123.245	0.911983
MIYHUY01	93.529	88.602	115.68	122.277	86.576	176.991	89.925	121.89	91.065	90.493	2.579	2.26	2.258	2.278	2.611		176.991	122.277	0.9119
OXPHAD10	89.213	91.285	123.174	119.368	90.116	177.874	89.272	117.458	88.726	91.488	2.138	2.198	2.207	2.164	2.147		177.874	123.174	0.911667
BUPJAX	123.78	88.414	90.972	90.747	90.811	87.366	91.785	116.593	178.439	119.5	2.226	1.804	1.811	1.796	1.798		178.439	123.78	0.910983
FARTIE	93.689	88.893	178.513	86.959	119.494	116.441	86.371	91.778	92.411	123.861	2.202	2.179	2.422	2.211	2.202		178.513	123.861	0.910867
CERXEC	175.671	89.407	89.216	120.487	121.028	94.473	90.623	88.538	118.404	87.816	2.209	1.798	1.789	1.768	1.762		175.671	121.028	0.910717
PPTCFE	90.929	119.023	88.243	88.924	117.233	92.319	178.246	123.625	89.434	90.248	1.794	1.795	2.243	1.791	1.795		178.246	123.625	0.91035
FARSOJ	86.305	93.707	177.376	86.63	122.764	117.696	96.182	91.417	85.89	119.514	2.197	2.008	2.365	2.203	2.203		177.376	122.764	0.9102
ICOLOE	177.778	87.922	83.684	123.173	117.925	93.599	94.169	88.121	117.824	92.59	2.155	1.893	2.324	2.306	2.329		177.778	123.173	0.910083
VARXIW	89.951	119.933	124.145	91.698	90.966	90.297	87.896	89.278	115.887	178.727	2.259	1.797	1.792	1.782	1.801		178.727	124.145	0.9097
TIYWON	179.076	87.004	86.791	124.503	118.386	93.648	93.497	89.017	116.598	90.098	2.207	2.08	1.773	1.793	1.782		179.076	124.503	0.90955
EZEXIS	89.595	88.356	179.042	92.427	121.256	124.47	91.362	87.151	91.13	114.036	1.794	2.324	1.761	1.801	1.809		179.042	124.47	0.909533
EGOZUV	88.244	87.186	119.905	119.236	91.795	175.426	90.686	120.854	91.758	90.383	2.197	2.25	2.254	2.249	2.225		175.426	120.854	0.909533
XECGOC	86.738	118.801	124.183	96.546	96.244	83.9	82.265	94.276	114.122	178.744	2.405	1.788	1.759	1.766	1.772		178.744	124.183	0.90935
RULDUX	177.437	89.737	90.55	121.939	115.125	90.644	91.371	87.258	122.88	90.285	2.18	2.084	2.058	2.074	2.068		177.437	122.88	0.909283
HONJAV	92.167	90.467	120.196	122.709	91.516	177.265	89.204	117.052	90.109	86.63	2.141	1.779	1.778	1.758	2.142		177.265	122.709	0.909267
LASXOS	90.312	90.88	120.648	118.247	91.034	175.638	86.389	121.088	89.394	91.944	2.209	1.756	1.772	1.754	2.209		175.638	121.088	0.909167
WICHUL01	176.126	91.626	94.647	118.42	121.603	86.566	89.226	93.558	119.014	84.494	2.469	1.767	1.779	1.79	1.806		176.126	121.603	0.908717
JAYJOJ	83.762	96.765	116.99	116.99	96.765	178.844	89.842	124.327	89.002	83.762	2.131	1.984	2.053	1.984	2.025		178.844	124.327	0.908617
YIQLAL	117.535	120.388	93.184	176.582	91.36	122.065	92.156	89.974	85.917	87.536	1.877	2.093	2.107	2.124	1.887		176.582	122.065	0.908617
GAYNID	92.95	93.585	176.962	93.82	122.475	122.178	89.535	86.704	83.606	115.229	2.23	1.851	2.255	2.251	2.254		176.962	122.475	0.908117
HEXKAX	89.881	90.243	179.017	89.922	116.903	124.551	89.377	90.998	89.647	118.535	2.59	2.165	2.163	2.62	2.609		179.017	124.551	0.907767
TMAMCR10	111.399	124.3	90.614	178.739	90.084	124.3	90.614	90.096	88.655	90.096	2.222	2.222	2.137	2.158	2.253		178.739	124.3	0.907317
EZILIJ	90.701	90.666	177.088	92.711	120.259	122.657	88.901	90.04	87.122	117.064	1.803	1.821	1.823	1.811	1.807		177.088	122.657	0.907183
BENYAV	92.086	124.057	89.244	88.241	119.746	89.985	178.482	116.048	88.663	91.83	2.096	1.809	1.773	1.806	1.806		178.482	124.057	0.907083
FOJBOV01	91.503	176.383	90.412	121.963	88.191	90.412	116.073	88.191	91.503	121.963	1.797	1.81	1.797	1.763	1.81		176.383	121.963	0.907
VILREP	92.152	87.578	90.242	92.152	87.578	119.629	120.743	175.156	119.629	90.242	2.235	2.162	2.235	2.162	2.209		175.156	120.743	0.906883
QINZOE	175.858	95.927	85.638	118.965	121.471	86.073	90.22	95.927	118.965	86.073	1.783	2.008	1.785	1.805	1.805		175.858	121.471	0.90645
HEMFEK	175.256	93.638	90.206	120.264	118.187	88.79	85.05	94.422	120.872	88.006	2.634	1.744	1.77	1.784	1.794		175.256	120.872	0.9064
VAZSAQ	86.809	93.056	175.974	90.155	119.741	118.657	89.944	89.521	90.59	121.596	1.859	2.112	2.095	1.869	1.845		175.974	121.596	0.9063
POPFEC10	121.29	89.252	116.873	90.536	176.203	92.143	121.829	88.647	87.593	91.651	2.05	1.776	1.793	2.18	2.164		176.203	121.829	0.906233
YEXCOT	80.155	176.995	82.837	122.632	94.89	100.209	118.772	82.242	99.521	112.551	1.751	1.365	2.199	2.184	1.768		176.995	122.632	0.90605
RUTYEK	174.841	88.567	90.894	119.021	120.449	90.054	94.088	89.064	120.508	87.35	2.273	1.78	1.792	1.773	1.788		174.841	120.508	0.90555
BENYAV	92.294	115.996	124.356	87.962	88.421	91.95	90.753	88.681	119.4	178.68	2.093	1.805	1.809	1.766	1.801		178.68	124.356	0.9054
BOCKUZ	85.92	119.148	120.874	88.445	87.381	94.523	94.415	89.302	119.74	175.198	2.28	1.789	1.8	1.792	1.782		175.198	120.874	0.9054
YATSOB	177.794	86.192	89.19	123.479	120.477	93.341	89.071	88.676	115.698	93.415	2.233	2.116	1.779	1.801	1.741		177.794	123.479	0.90525
HEJKOY	79.583	121.458	98.438	100.65	115.547	79.583	175.761	115.547	98.438	83.589	1.908	1.834	1.793	1.837	1.834		175.761	121.458	0.90505
QUGDOL	120.41	90.007	122.581	91.182	176.861	88.234	117.006	90.39	91.228	88.88	2.357	2.163	2.21	1.903	1.908		176.861	122.581	0.904667
ZEDSEJ	92.615	88.648	177.491	91.188	123.214	117.637	89.698	88.536	89.417	119.147	2.555	2.082	2.321	2.571	2.559		177.491	123.214	0.904617
BIDPUA	87.66	90.504	115.632	121.146	90.258	177.487	90.861	123.216	88.385	92.183	2.415	2.329	2.337	2.296	2.417		177.487	123.216	0.904517
AJUSIJ	176.769	91.686	94.454	117.039	118.369	86.19	84.659	98.473	122.502	84.686	2.198	1.984	1.77	1.784	1.768		176.769	122.502	0.90445
TICQAY	88.05	91.401	176.277	90.734	116.348	122.027	89.007	88.868	92.093	121.594	1.785	2.241	2.252	1.79	1.791		176.277	122.027	0.904167
YUGWOM	90.849	91.731	91.66	90.962	87.809	123	118.923	177.238	117.897	87.121	1.753	1.589	1.82	1.762	1.749		177.238	123	0.903967
FUGYEL	177.304	89.068	90.951	116.427	123.08	93.579	87.264	89.489	120.49	89.496	2.218	1.781	1.747	1.785	1.747		177.304	123.08	0.903733
POBDIU	87.754	87.312	177.673	92.012	123.461	121.252	90.402	90.056	92.436	115.042	2.091	2.404	2.386	2.111	2.083		177.673	123.461	0.903533
VORTAX	177.13	88.176	86.148	119.827	116.693	93.593	90.992	88.286	122.919	92.932	2.229	1.967	1.77	1.816	1.786		177.13	122.919	0.903517
WEQJUX	113.42	125.12	89.795	179.328	89.348	121.435	87.209	89.584	91.219	92.804	2.526	2.057	2.031	2.042	2.467		179.328	125.12	0.903467
OKEXEH	90.083	90.818	177.67	87.619	118.827	117.699	90.888	90.078	90.606	123.465	1.785	1.929	1.921	1.773	1.78		177.67	123.465	0.903417
TIYTUQ01	175.513	83.563	89.637	117.336	121.318	91.953	92.548	89.247	120.749	93.225	2.213	2.09	1.778	1.789	1.768		175.513	121.318	0.90325
KELQOH	88.529	88.444	121.581	117.584	94.257	175.751	89.585	120.792	89.461	89.854	2.234	2.124	2.117	2.109	2.177		175.751	121.581	0.902833
NEYJUY	90.02	92.255	177.041	89.974	120.171	116.95	90.249	87.405	90.25	122.877	2.371	2.28	2.257	2.395	2.392		177.041	122.877	0.902733
LERCIU	83.929	94.284	119.797	115.075	94.636	177.305	84.023	123.147	95.153	88.034	2.011	2.118	2.092	2.095	1.742		177.305	123.147	0.902633
DECBAO01	90.947	90.947	122.595	119.68	90.823	176.75	88.953	117.723	87.802	90.634	2.276	1.771	1.768	1.756	2.268		176.75	122.595	0.902583
WUWQOU	83.505	94.178	118.524	121.012	92.189	175.155	86.091	119.875	91.31	92.654	2.299	1.796	1.77	1.793	2.234		175.155	121.012	0.902383
CUBGEL	94.641	85.381	122.06	120.628	87.207	176.196	89.709	116.237	87.065	96.178	2.124	1.756	1.769	1.774	1.976		176.196	122.06	0.902267
SAVHOM01	87.809	90.362	90.362	91.462	91.462	122.475	122.475	176.603	115.024	88.794	2.249	2.334	2.268	2.347	2.268		176.603	122.475	0.902133
SAGWEF	87.177	89.631	176.727	90.091	116.097	121.276	92.049	93.004	88.053	122.626	1.914	2.35	2.356	1.907	1.923		176.727	122.626	0.901683
VILRIT	89.773	88.511	91.846	89.773	88.511	122.93	114.14	177.022	122.93	91.846	2.24	2.169	2.24	2.169	2.22		177.022	122.93	0.901533
YUMMEA	89.749	88.988	118.17	118.037	88.007	177.788	92.142	123.701	90.054	91.185	2.319	1.933	1.919	1.92	2.315		177.788	123.701	0.90145
GUNZOE	90.568	90.244	123.438	119.944	90.59	177.523	88.317	116.617	89.282	91.138	2.352	1.972	1.95	1.939	2.356		177.523	123.438	0.901417
TIYXAA01	176.08	84.945	90.18	118.628	121.998	91.445	92.909	88.458	118.948	92.173	2.208	2.083	1.794	1.795	1.8		176.08	121.998	0.901367
FUGYEL	91.226	119.162	118.751	89.582	90.015	93.096	86.836	89.244	122.074	176.144	2.212	1.782	1.778	1.768	1.783		176.144	122.074	0.901167
NEQCAN	89.25	92.307	116.795	121.18	90.032	176.068	93.318	122.001	89.204	86.083	2.154	1.798	1.807	1.794	1.816		176.068	122.001	0.901117
RASQUX	178.265	91.844	92.136	120.127	124.201	88.099	89.453	90.636	115.463	87.963	1.954	2.235	1.762	1.742	1.75		178.265	124.201	0.901067
ZISDUA	89.373	121.892	89.969	91.429	125.095	89.379	179.156	112.974	90.52	89.314	2.329	1.818	1.752	1.773	1.707		179.156	125.095	0.901017
XUTSUB	89.443	89.196	94.501	89.73	89.45	121.653	120.487	175.712	117.765	87.804	2.267	1.8	1.789	1.795	1.793		175.712	121.653	0.900983
TEJXEM	88.925	118.061	117.85	90.182	86.124	92.287	89.877	92.71	124.074	178.118	2.292	1.775	1.785	1.774	1.769		178.118	124.074	0.900733
EACSIF	177.97	84.2	86.824	119.976	123.932	93.787	93.779	85.968	114.377	95.397	1.765	2.224	1.764	1.689	1.799		177.97	123.932	0.900633
DEBVEL	94.111	178.548	95.567	121.738	90.983	87.024	124.513	87.74	84.518	113.127	2.266	1.781	2.273	2.284	2.414		178.548	124.513	0.900583
TOMMUD	176.61	86.275	84.876	120.048	116.634	93.204	92.599	90.5	122.586	92.725	2.233	2.131	1.772	1.786	1.779		176.61	122.586	0.9004
TIYXAA	176.037	84.776	90.416	118.735	122.022	91.575	92.703	88.431	118.822	92.208	2.209	2.08	1.79	1.795	1.803		176.037	122.022	0.90025
TIYTUQ	175.345	83.455	89.613	117.248	121.348	91.904	92.475	89.482	120.821	93.254	2.213	2.089	1.778	1.793	1.771		175.345	121.348	0.89995
UCUXUO	86.758	176.502	87.15	117.864	92.577	94.28	122.523	83.993	95.086	118.163	2.238	2.125	1.756	2.264	2.268		176.502	122.523	0.89965
UJISEL	89.72	89.838	177.827	90.069	115.168	120.95	88.677	92.043	89.727	123.856	1.842	1.828	1.824	1.862	1.856		177.827	123.856	0.899517
MUBTUY	86.058	94.013	117.785	119.095	93.091	176.992	97.505	123.057	85.128	84.365	2.513	2.2	2.194	2.2	1.992		176.992	123.057	0.898917
LETLEC	92.06	91.225	117.456	122.775	89.848	176.695	89.543	119.768	88.62	88.837	2.211	1.77	1.781	1.776	2.206		176.695	122.775	0.898667
WAGRED	88.089	90.718	91.243	88.089	90.718	117.665	124.669	178.563	117.665	91.243	1.779	2.208	1.779	2.208	1.764		178.563	124.669	0.898233
OSUJAP	86.353	90.745	122.567	116.229	93.583	176.459	87.47	120.761	92.393	89.648	2.343	1.775	1.805	1.794	1.756		176.459	122.567	0.8982
OSUJAP	85.838	90.325	121.786	120.574	92.436	175.669	90.761	117.305	92.97	87.552	2.357	1.793	1.765	1.8	1.778		175.669	121.786	0.89805
ZEDSAF	93.752	90.576	176.724	88.207	122.85	118.176	89.519	90.372	87.718	118.76	2.373	2.099	2.337	2.376	2.388		176.724	122.85	0.8979
AZOCNI12	89.141	91.211	177.109	89.343	117.747	119.01	88.619	90.357	91.473	123.238	2.293	2.215	2.23	2.302	2.305		177.109	123.238	0.89785
GAJBOI	88.218	116.593	121.445	90.118	91.681	90.137	85.336	94.734	121.545	175.406	2.285	1.796	1.79	1.783	1.792		175.406	121.545	0.897683
BUZPAN	178.093	91.677	92.272	121.493	114.22	87.317	86.961	88.013	124.24	93.877	2.373	2.108	2.211	2.218	2.207		178.093	124.24	0.89755
UDAMIV01	175.765	88.884	90.442	121.918	120.065	87.192	89.994	91.958	117.999	91.386	2.237	1.76	1.778	1.766	1.782		175.765	121.918	0.89745
FOKDEO	177.21	93.202	97.009	117.648	123.372	84.727	85.608	94.284	116.907	85.323	2.254	1.796	1.773	1.775	1.751		177.21	123.372	0.8973
ODUKIJ	89.811	95.675	119.747	120.594	89.538	174.431	89.519	119.615	86.929	88.578	2.24	2.033	2.022	2.045	2.206		174.431	120.594	0.897283
SAVHOM	115.015	122.484	90.422	176.317	88.333	122.484	90.422	91.556	87.984	91.556	2.231	2.231	2.332	2.341	2.232		176.317	122.484	0.897217
POPFEC01	122.737	88.447	115.919	88.955	176.568	91.827	121.343	89.676	89.282	91.605	2.058	1.785	1.772	2.185	2.186		176.568	122.737	0.897183
DASCIJ	175.464	95.344	92.113	120.271	116.588	88.994	84.466	94.87	121.634	84.332	2.409	1.879	2.207	2.223	2.211		175.464	121.634	0.897167
KALVEY	88.402	123.909	90.102	93.438	119.519	86.682	177.739	116.178	92.75	88.745	2.224	1.778	1.801	1.787	1.803		177.739	123.909	0.897167
CEGWAP	89.337	123.406	91.982	88.609	118.297	91.982	177.218	118.297	89.337	88.609	1.847	1.847	1.847	1.796	1.847		177.218	123.406	0.896867
VOVLEX	87.912	89.094	122.716	117.752	91.084	176.516	89.978	119.531	90.142	91.941	2.239	1.775	1.75	1.801	2.241		176.516	122.716	0.896667
TIYWUT01	175.96	90.547	85.073	122.168	118.41	92.698	91.245	88.341	119.041	92.227	2.206	2.068	1.802	1.785	1.802		175.96	122.168	0.896533
BAMNIM	117.687	90.406	86.801	93.495	91.137	87.945	90.051	120.753	175.342	121.557	1.821	1.742	1.699	1.982	1.743		175.342	121.557	0.896417
JEDGAA	89.842	120.865	89.229	91.645	117.093	86.811	175.816	122.032	90.165	92.306	2.263	1.778	1.769	1.802	1.79		175.816	122.032	0.8964
IDUKUP	87.957	124.238	118.773	90.69	90.442	91.507	88.11	91.241	116.932	178.018	2.575	1.79	1.798	1.769	1.791		178.018	124.238	0.896333
JIRNAZ	86.663	118.511	121.268	90.824	91.501	91.126	91.487	88.387	120.216	175.041	2.158	1.799	1.793	1.796	1.788		175.041	121.268	0.896217
KISGEY	88.236	88.409	121.404	115.704	90.16	176.644	91.211	122.883	90.624	91.576	2.365	1.903	1.94	1.934	2.363		176.644	122.883	0.896017
WICHUL	175.043	92.706	94.965	120.001	121.283	85.935	89.878	91.19	117.936	85.463	2.452	1.754	1.777	1.786	1.778		175.043	121.283	0.896
DIWROQ	87	91.852	116.964	118.514	89.533	178.194	90.27	124.441	91.494	89.967	2.231	1.783	1.784	1.783	1.782		178.194	124.441	0.895883
ONEPAA	88.427	91.193	117.219	117.219	91.193	179.171	89.517	125.425	91.312	88.427	1.869	1.811	1.807	1.811	1.802		179.171	125.425	0.895767
DEDBIY	174.822	85.053	93.89	121.097	119.974	90.943	90.911	86.283	118.698	92.901	2.241	2.013	1.788	1.776	1.781		174.822	121.097	0.895417
RUQXOQ	91.903	88.922	118.608	117.687	88.733	177.356	92.156	123.631	89.653	88.719	2.204	1.766	1.768	1.774	2.201		177.356	123.631	0.895417
GILFOW	88.089	84.383	177.46	86.275	122.013	114.091	94.251	93.251	93.748	123.745	2.311	2.153	2.357	2.31	2.319		177.46	123.745	0.89525
JEBNIN	89.106	124.317	117.614	92.999	91.287	88.707	85.241	92.541	117.606	178.007	2.028	1.819	1.827	1.808	1.813		178.007	124.317	0.894833
REMKUP	176.427	89.284	91.875	120.366	122.776	90.654	91.341	88.476	116.856	88.554	1.799	2.235	1.792	1.779	1.795		176.427	122.776	0.894183
AZOCNI10	91.42	88.193	175.917	89.322	122.286	119.483	92.522	89.751	88.94	118.226	2.28	2.234	2.218	2.314	2.302		175.917	122.286	0.89385
JEGDOO	176.296	89.144	92.737	121.371	115.472	93.89	83.84	95.036	122.675	85.581	2.366	1.767	2.275	2.259	2.28		176.296	122.675	0.893683
HIDWOI01	174.716	87.752	86.261	121.103	119.066	95.903	95.208	90.383	119.514	84.51	1.995	1.779	1.798	1.794	1.792		174.716	121.103	0.89355
ISULEO	89.451	115.897	89.513	88.964	119.649	89.061	178.048	124.44	92.88	90.257	2.339	1.782	1.762	1.787	1.793		178.048	124.44	0.893467
YOYLON	87.338	121.554	115.665	95.23	90.751	84.395	87.338	95.23	121.554	175.146	2.218	2.093	2.093	2.094	2.107		175.146	121.554	0.8932
CUTPAI10	94.471	85.941	117.328	122.252	82.174	175.836	95.372	118.494	88.102	94.01	1.766	2.306	2.323	2.335	2.523		175.836	122.252	0.893067
JIHWIG	87.317	92.04	121.179	119.505	89.659	174.76	89.876	119.262	86.006	95.194	1.917	2.182	2.193	2.181	1.915		174.76	121.179	0.893017
LUKCUP	118.597	93.86	120.472	91.019	174.509	88.13	120.928	91.066	88.574	87.383	2.726	1.927	1.946	1.99	2.453		174.509	120.928	0.893017
GILFOW	88.244	85.508	179.41	88.357	118.292	115.692	92.203	91.693	93.951	125.834	2.323	2.147	2.359	2.312	2.32		179.41	125.834	0.892933
FENVUP	92.733	90.506	122.16	120.221	92.316	175.72	88.382	117.619	87.525	88.662	2.209	1.766	1.757	1.753	2.215		175.72	122.16	0.892667
RURKOE	90.379	92.512	119.098	122.835	91.902	176.375	83.376	117.465	93.302	88.701	2.075	1.795	1.798	1.813	1.819		176.375	122.835	0.892333
LIPKOK	87.388	122.914	118.319	92.252	92.634	85.585	91.295	91.016	118.417	176.452	2.588	1.971	1.924	1.947	2.708		176.452	122.914	0.8923
LIPKOK02	87.388	122.914	118.319	92.252	92.634	85.585	91.295	91.016	118.417	176.452	2.588	1.971	1.924	1.947	2.708		176.452	122.914	0.8923
NUNWOJ	89.129	90.859	179.084	89.354	125.549	111.288	90.775	89.935	90.024	123.163	2.229	2.264	2.262	1.987	2.261		179.084	125.549	0.89225
CIPBAE	107.304	90.626	126.331	89.317	179.864	90.626	126.331	89.454	90.548	89.454	2.302	2.302	1.73	2.202	2.212		179.864	126.331	0.892217
NAJJUE	87.459	95.48	121.376	120.555	97.875	174.866	80.153	114.83	94.718	84.651	1.863	1.787	1.779	1.783	1.834		174.866	121.376	0.8915
MAJFEI	121.284	88.847	125.549	91.038	179.039	92.196	113.166	90.223	89.309	88.491	2.651	1.714	1.821	2.214	2.217		179.039	125.549	0.8915
VEJLUS	90.085	92.276	115.797	122.965	91.607	176.447	88.332	120.761	93.026	84.902	2.279	1.81	1.795	1.794	1.798		176.447	122.965	0.891367
NIBMIW	90.693	90.749	176.291	88.141	116.228	122.812	89.912	88.41	91.998	120.96	1.743	2.189	2.186	2.013	1.741		176.291	122.812	0.891317
GOQZIX	92.81	87.336	176.267	90.803	122.795	121.513	90.264	89.773	89.253	115.691	2.421	2.308	2.285	2.408	2.431		176.267	122.795	0.8912
BILLIS	89.523	94.135	176.941	91.835	116.772	119.741	89.229	86.527	88.909	123.487	1.91	2.379	2.378	1.915	1.903		176.941	123.487	0.8909
SIZWAA	174.455	88.974	88.896	119.466	119.517	86.8	90.206	91.592	121.014	93.613	1.823	1.815	1.792	1.796	1.788		174.455	121.014	0.890683
JAHJIM	92.371	84.737	122.107	116.145	91.63	175.533	91.507	121.299	87.169	92.783	2.25	1.767	1.785	1.791	1.989		175.533	122.107	0.890433
MUBTIM	95.898	123.112	87.439	95.242	117.594	93.128	176.532	119.178	84.236	83.968	2.437	2.216	2.399	2.2	2.195		176.532	123.112	0.890333
SAMQOM	178.065	89.759	90.221	112.446	124.654	90.341	88.102	91.702	122.873	89.83	2.328	1.745	1.824	1.802	1.723		178.065	124.654	0.890183
VAJZIS	89.089	92.216	88.768	89.089	92.216	118.919	122.162	175.569	118.919	88.768	2.265	2.196	2.265	2.196	1.783		175.569	122.162	0.890117
CENLIR	173.395	79.707	90.733	117.883	118.953	96.119	95.802	81.83	119.99	95.902	2.307	2.312	1.79	1.794	1.791		173.395	119.99	0.890083
EDAVEM	176.086	95.96	101.225	110.862	122.69	80.733	82.287	100.031	119.251	80.166	2.46	1.911	1.903	1.925	1.98		176.086	122.69	0.889933
TUBWAO	94.238	90.959	174.682	89.988	121.318	117.72	91.061	87.679	86.171	120.885	2.38	2.317	2.175	2.378	2.394		174.682	121.318	0.8894
TIYWUT	175.938	90.372	84.868	122.575	118.268	92.774	91.364	88.028	118.685	92.739	2.21	2.065	1.798	1.792	1.783		175.938	122.575	0.889383
SODMED	176.405	89.185	89.199	119.929	123.05	93.774	91.276	88.481	116.921	88.194	2.194	1.78	1.735	1.748	1.748		176.405	123.05	0.88925
EHIFUX	174.513	88.87	92.724	119.875	118.965	88.87	92.724	88.361	121.161	88.361	1.858	1.858	1.776	1.805	1.806		174.513	121.161	0.8892
SIJKUU	84.033	83.888	178.616	91.685	125.271	118.6	95.042	89.638	95.672	114.578	1.91	2.208	1.948	1.923	1.922		178.616	125.271	0.889083
FAZCIS	174.905	93.058	91.572	121.57	121.206	89.347	91.325	88.244	117.147	86.668	2.191	1.723	1.786	1.773	1.751		174.905	121.57	0.888917
DPOCFE	89.805	95.122	89.805	88.459	88.519	118.381	123.028	176.359	118.381	88.459	1.816	2.191	1.816	2.116	1.782		176.359	123.028	0.88885
AZOCNI11	88.648	91.629	176.561	90.254	119.731	117.025	88.561	89.596	91.429	123.244	2.31	2.196	2.191	2.315	2.318		176.561	123.244	0.888617
NIBMOC	88.504	89.076	114.608	123.265	90.425	176.564	91.608	122.114	91.618	88.796	2.188	1.998	1.758	1.75	2.187		176.564	123.265	0.888317
FIRBIR01	90.254	89.963	89.736	89.963	89.736	126.234	126.234	179.491	107.533	90.254	2.022	2.243	2.029	2.243	2.029		179.491	126.234	0.887617
REMLEA	91.548	86.982	175.806	91.387	116.443	122.56	89.303	91.695	89.098	120.996	1.766	2.219	2.205	1.754	1.776		175.806	122.56	0.887433
PNIMNC10	178.173	91.477	89.343	124.934	117.496	90.311	89.502	89.028	117.57	90.474	1.832	1.802	1.803	1.818	1.792		178.173	124.934	0.887317
PYDTCI	176.169	88.561	94.48	118.368	122.93	89.364	89.341	87.76	118.698	90.667	1.771	2.047	1.809	1.806	1.799		176.169	122.93	0.887317
KAGJIL	92.253	91.244	116.737	122.775	88.63	175.994	89.856	120.488	90.315	87.912	2.314	1.746	1.78	1.763	2.198		175.994	122.775	0.886983
NELWEI	95.972	83.577	124.887	113.865	81.904	178.104	101.771	115.23	79.967	96.649	1.908	2.303	2.296	2.302	1.625		178.104	124.887	0.88695
IDUKUP	88.94	120.719	90.436	90.815	117.335	86.606	175.151	121.938	89.58	93.597	2.578	1.792	1.77	1.785	1.786		175.151	121.938	0.886883
URUHOF	174.599	88.695	83.533	121.394	116.552	94.977	91.167	89.478	121.33	92.41	2.253	2.143	1.794	1.808	1.804		174.599	121.394	0.88675
AYETUT	87.765	89.731	117.378	118.523	88.445	177.282	90.177	124.099	91.913	92.084	2.251	1.794	1.8	1.787	1.79		177.282	124.099	0.886383
FARTEA	93.375	88.252	177.287	87.68	118.249	117.385	84.022	93.167	93.62	124.113	2.214	2.211	2.405	2.202	2.203		177.287	124.113	0.886233
CNPRFE	93.052	92.196	175.598	90.55	121.802	115.773	89.852	85.101	89.516	122.425	2.204	2.213	2.233	2.228	2.215		175.598	122.425	0.886217
FUDKIY	175.142	94.424	97.538	114.387	121.99	81.685	86.979	95.568	120.58	84.126	2.287	1.811	1.777	1.762	1.772		175.142	121.99	0.885867
DPPFEO	87.635	89.316	177.144	91.295	116.501	124.013	89.613	90.722	91.592	119.426	1.785	2.239	1.793	1.785	1.8		177.144	124.013	0.885517
TIYXEE01	175.404	85.053	87.596	122.291	116.435	91.817	91.112	88.827	120.552	95.587	2.239	2.08	1.777	1.786	1.779		175.404	122.291	0.885217
FUWMEP	83.969	175.483	93.222	122.375	91.278	96.309	116.149	84.731	90.702	120.804	1.777	1.991	1.776	1.779	1.78		175.483	122.375	0.885133
ODUKOP	89.03	88.982	119.519	117.255	90.947	176.127	89.132	123.021	94.74	87.352	2.276	2.028	2.022	2.001	2.081		176.127	123.021	0.8851
AZOCNI13	88.725	91.054	176.772	89.404	120.147	116.18	88.634	90.517	91.776	123.672	2.298	2.216	2.211	2.305	2.31		176.772	123.672	0.885
JAVZEL	177.256	90.872	83.456	117.647	124.16	87.437	99.246	90.825	117.986	88.339	2.288	2.085	2.243	2.266	2.261		177.256	124.16	0.884933
TIYXEE	175.392	84.96	87.62	122.32	116.485	91.99	90.967	88.987	120.488	95.471	2.239	2.078	1.78	1.786	1.778		175.392	122.32	0.884533
UBIBEO	90.773	92.894	122.559	122.931	89.247	175.996	88.624	114.509	88.049	90.694	1.824	1.808	1.802	1.808	1.819		175.996	122.931	0.884417
KOCCUA	87.133	93.316	176.06	90.942	123.015	117.922	96.083	85.5	87.199	118.899	1.852	2.183	2.16	1.851	1.848		176.06	123.015	0.884083
OTOKEP	89.287	89.284	177.244	92.549	122.689	113.091	89.825	90.107	88.666	124.203	2.304	2.11	2.128	1.791	2.308		177.244	124.203	0.884017
FEVTIL	120.977	116.605	94.752	175.251	87.236	122.242	89.658	89.915	89.881	88.691	2.256	1.757	2.311	2.372	2.269		175.251	122.242	0.883483
ZASFAD	85.986	93.776	177.153	85.825	124.158	118.457	95.982	91.444	87.102	117.361	2.194	2.024	2.36	2.2	2.213		177.153	124.158	0.88325
REJWAF	88.905	91.545	88.74	87.66	93.05	117.7	120.069	175.208	122.225	90.162	2.234	1.796	1.775	1.792	1.793		175.208	122.225	0.88305
TPFECO	90.178	91.606	176.971	84.894	114.668	123.99	90.29	92.306	90.614	121.181	1.893	2.267	1.959	1.825	1.72		176.971	123.99	0.883017
COMARC	175.963	94.129	88.889	122.985	116.739	87.8	87.076	92.129	120.026	90.163	2.406	1.774	1.772	1.785	1.771		175.963	122.985	0.882967
BIPXIJ	92.821	84.471	178.323	87.414	125.35	118.583	88.147	93.386	93.864	116.066	2.28	2.065	2.067	1.859	1.859		178.323	125.35	0.882883
KELQOH	87.544	88.444	120.744	119.069	90.287	173.716	92.506	120.129	93.702	87.549	2.237	2.122	2.099	2.114	2.18		173.716	120.744	0.882867
HIDWIC	177.141	89.33	87.295	117.131	124.17	89.199	95.56	84.542	117.911	94.262	2.003	1.773	1.785	1.795	1.771		177.141	124.17	0.88285
EDATEK	117.861	100.541	82.757	81.329	99.907	96.597	79.274	112.267	175.635	122.715	1.989	1.916	2.377	1.923	1.923		175.635	122.715	0.882
NOQPAK	89.563	92.599	121.136	120.087	85.506	174.053	92.257	118.776	91.366	88.597	1.926	2.099	2.166	2.166	1.913		174.053	121.136	0.88195
WEHNUS	174.397	95.825	95.843	121.482	119.956	86.027	88.053	94.112	116.082	80.401	2.295	1.813	1.802	1.791	1.809		174.397	121.482	0.881917
WICHUL01	175.4	92.461	94.013	120.458	122.492	86.608	90.434	91.859	116.36	84.86	2.454	1.76	1.792	1.778	1.772		175.4	122.492	0.8818
VOCBEU	87.662	115.218	95.231	90.831	124.189	86.733	177.093	120.004	91.763	87.962	2.395	1.78	1.775	1.793	1.769		177.093	124.189	0.881733
CUYGUY	87.486	88.378	119.97	119.463	90.103	173.424	96.952	120.528	89.543	87.6	2.174	1.788	1.786	1.806	1.795		173.424	120.528	0.8816
SODMIH	91.954	117.552	87.023	91.954	117.552	91.105	177.79	124.897	91.105	87.023	2.168	1.781	2.168	1.781	1.784		177.79	124.897	0.88155
YUGWOM	89.751	176.268	91.456	115.314	90.549	89.385	121.258	86.896	92.096	123.39	1.825	1.793	1.777	1.713	1.819		176.268	123.39	0.8813
KIHSID	89.848	85.369	121.286	117.318	86.891	174.156	97.132	120.477	88.234	92.664	2.207	1.744	1.765	1.755	2.197		174.156	121.286	0.881167
IQETED	177.156	87.794	90.928	124.304	118.471	90.254	91.803	87.863	117.111	91.252	2.264	2.012	1.788	1.789	1.798		177.156	124.304	0.880867
SAQPUX	89.945	124.887	114.848	88.727	87.546	90.243	92.831	90.898	120.181	177.731	2.277	1.805	1.781	1.777	1.79		177.731	124.887	0.880733
DEDBAQ	92.53	93.25	175.553	86.958	115.442	120.905	83.358	93.88	90.327	122.72	1.771	2.248	2.007	1.792	1.791		175.553	122.72	0.88055
XEVQAQ	177.335	90.827	88.385	124.531	116.689	91.832	90.174	90.357	118.778	88.613	2.281	1.858	1.758	1.814	1.753		177.335	124.531	0.880067
CIZDOF	175.533	94.571	90.353	120.397	122.739	85.379	93.677	92.873	116.24	83.427	2.008	2.249	1.795	1.785	1.774		175.533	122.739	0.8799
AZOCNI14	88.745	91.064	176.677	89.471	121.336	114.78	88.627	90.306	91.884	123.884	2.298	2.207	2.204	2.302	2.31		176.677	123.884	0.879883
KELQUN	174.606	88.09	83.633	121.815	115.08	96.776	91.803	86.519	121.673	93.486	2.289	2.159	2.096	2.096	2.087		174.606	121.815	0.87985
GERHUJ	86.597	91.513	113.05	121.491	88.983	178.078	87.17	125.288	93.897	91.823	2.287	1.797	1.784	1.804	1.784		178.078	125.288	0.879833
DIKNUG	89.164	117.371	88.648	87.715	119.482	90.605	175.934	123.145	93.444	90.614	2.306	1.756	1.734	1.775	1.793		175.934	123.145	0.879817
RAXZUL	95.133	87.801	177.161	89.765	124.378	120.873	87.437	90.255	89.844	114.667	1.788	2.311	1.76	1.79	1.796		177.161	124.378	0.879717
WEHNOM	79.615	117.533	120.219	96.03	92.897	94.099	80.243	97.383	119.574	172.998	2.374	1.776	1.788	1.81	1.817		172.998	120.219	0.87965
AJUQUT	86.538	116.937	90.991	89.766	119.771	93.982	176.066	123.288	89.865	89.036	2.242	1.767	2.242	1.769	1.769		176.066	123.288	0.879633
CPETCP	89.072	89.431	177.866	91.053	117.323	125.115	89.109	90.779	90.701	117.556	2.183	2.271	2.289	2.214	2.193		177.866	125.115	0.879183
LALHUC	173.447	84.384	84.183	118.852	119.327	89.659	101.261	90.953	120.698	89.585	2.357	2.424	2.038	2.03	2.036		173.447	120.698	0.87915
SIZWII	91.92	89.882	174.582	87.972	119.412	118.734	92.664	87.157	90.445	121.843	1.805	1.809	1.822	1.783	1.793		174.582	121.843	0.878983
JASRUR	176.889	90.331	91.148	116.389	119.339	90.315	85.973	91.972	124.156	90.364	2.242	1.787	1.792	1.791	1.791		176.889	124.156	0.878883
SUJLAM	88.277	90.412	177.214	89.976	119.786	115.599	91.15	88.103	92.294	124.504	2.249	2.304	2.303	2.241	2.251		177.214	124.504	0.8785
TIKMOR	88.359	86.883	177.114	89.511	117.206	124.406	91.569	93.063	90.78	118.35	1.907	2.361	2.361	1.911	1.91		177.114	124.406	0.878467
AVUVUI	125.855	108.286	89.401	178.551	89.75	125.855	90.496	89.75	89.401	90.953	2.315	2.325	2.203	2.187	2.325		178.551	125.855	0.878267
XAQBAS	175.504	88.928	90.353	117.28	119.901	86.788	90.824	90.078	122.815	93.238	2.245	1.772	1.777	1.777	1.786		175.504	122.815	0.87815
JOLWOW	86.992	118.487	124.147	90.827	90.796	92.355	88.226	91.013	117.295	176.799	2.238	1.767	1.782	1.772	1.762		176.799	124.147	0.877533
ZOPXUZ	85.7	115.946	95.691	91.467	121.319	89.048	173.94	121.131	95.614	82.788	2.234	1.77	1.788	1.78	1.779		173.94	121.319	0.877017
PIQFIE	85.531	123.167	117.871	95.576	92.473	85.531	88.645	92.473	117.871	175.779	2.01	1.775	1.787	1.793	1.775		175.779	123.167	0.876867
ONOSOA	177.901	85.568	90.382	117.561	125.295	93.18	91.685	86.146	116.469	93.217	1.779	2.023	1.799	1.773	1.769		177.901	125.295	0.876767
AYEBUD	85.905	79.52	79.337	99.567	96.154	114.18	117.986	173.934	121.366	99.806	1.767	1.494	1.763	1.757	1.795		173.934	121.366	0.876133
CUBPIA	89.946	92.158	112.711	123.634	87.464	176.201	89.946	123.634	92.158	88.737	2.212	1.797	1.797	1.796	1.796		176.201	123.634	0.876117
TISCIH	89.49	90.912	177.603	95.173	125.04	119.619	91.896	85.998	86.702	115.213	1.858	2.217	2.203	1.863	1.859		177.603	125.04	0.87605
LADZEV	118.955	92.209	118.208	90.775	175.375	90.331	122.834	92.29	88.043	86.553	2.422	1.792	1.776	2.43	2.442		175.375	122.834	0.875683
FOZPUF	175.917	89.336	96.916	120.162	123.378	89.12	87.155	85.545	116.44	92.152	2.684	1.961	1.813	1.804	1.807		175.917	123.378	0.87565
JIHWOM	88.046	91.963	121.957	119.436	89.632	174.491	88.891	118.566	86.43	95.204	1.907	2.161	2.179	2.154	1.902		174.491	121.957	0.875567
UZODAP	88.506	87.87	177.519	93.09	115.739	125.011	90.315	89.391	91.02	119.064	1.784	2.23	1.789	1.785	1.797		177.519	125.011	0.875133
QAPCOZ	90.779	126.773	88.892	90.367	116.613	88.892	179.265	116.613	90.779	90.367	2.172	1.965	2.172	1.928	1.965		179.265	126.773	0.874867
BORKAU	174.759	84.19	86.859	118.071	119.314	91.295	93.336	93.5	122.289	91.03	2.23	1.978	1.787	1.792	1.779		174.759	122.289	0.8745
BEMCOL	176.553	89.374	89.177	120.83	124.089	89.239	94.269	89.76	115.054	88.404	2.041	1.76	1.805	1.803	1.798		176.553	124.089	0.8744
YIQLEP	86.578	94.455	176.246	90.687	121.003	115.14	92.62	86.722	89.207	123.791	1.863	2.098	2.092	1.888	1.86		176.246	123.791	0.87425
JAVZEL	176.026	91.05	90.319	116.458	119.802	87.508	87.401	84.914	123.617	99.016	2.289	2.1	2.259	2.241	2.251		176.026	123.617	0.873483
TIYVAY	174.816	84.292	86.557	119.358	117.672	91.889	92.565	91.886	122.413	92.995	2.216	2.08	1.788	1.786	1.785		174.816	122.413	0.873383
HORJUV	106.924	90.886	89.756	89.731	89.19	90.886	89.756	126.535	178.921	126.535	2.363	2.363	2.222	2.343	2.233		178.921	126.535	0.8731
JUVJER	176.895	90.91	93.071	116.389	124.562	86.184	89.296	89.212	118.954	91.536	2.216	1.79	1.792	1.813	1.777		176.895	124.562	0.872217
IQETIH	178.109	87.049	92.313	125.784	118.91	94.601	87.832	84.528	114.919	93.857	2.25	2.031	1.783	1.78	1.792		178.109	125.784	0.872083
GAJHIK	86.633	93.609	123.765	116.16	84.875	176.073	90.588	120.057	92.53	91.608	2.076	1.917	1.997	2.041	2.091		176.073	123.765	0.8718
KUVRUO	89.532	119.259	93.722	91.996	124.441	89.099	176.745	116.061	89.324	86.551	2.311	1.802	1.782	1.801	1.799		176.745	124.441	0.871733
XEZNUM	93.976	172.536	89.743	119.877	86.268	89.743	120.245	86.268	93.976	119.877	2.446	2.234	2.446	2.228	2.234		172.536	120.245	0.871517
WASZOF	173.394	95.822	84.358	118.014	120.772	90.599	91.001	86.618	121.121	91.439	1.781	2.328	1.784	1.756	1.769		173.394	121.121	0.871217
MAJFEI	118.668	90.513	126.739	89.712	178.999	89.481	114.592	90.483	89.778	89.948	2.649	1.71	1.751	2.229	2.208		178.999	126.739	0.871
TIYXAA01	177.258	86.994	89.117	125.004	120.794	92.906	93.429	87.156	113.743	90.546	2.215	2.075	1.79	1.778	1.793		177.258	125.004	0.8709
TICVAE	93.272	92.131	122.132	120.173	88.107	174.383	87.618	117.671	88.209	90.741	2.493	2.083	2.08	2.086	2.515		174.383	122.132	0.87085
VAFHAM	175.187	85.171	88.621	116.275	122.941	90.446	91.925	95.608	120.777	88.44	2.222	2.011	1.801	1.804	1.778		175.187	122.941	0.870767
FARTAW	92.273	89.087	176.892	84.596	114.533	120.504	86.342	93.926	94.013	124.663	2.213	2.18	2.4	2.204	2.199		176.892	124.663	0.870483
MADCIG	85.571	91.822	124.386	115.452	94.1	176.573	90.29	119.373	93.021	85.265	2.372	1.796	1.797	1.789	1.774		176.573	124.386	0.869783
CUYPAN10	92.348	177.782	90.494	115.916	89.768	87.244	118.459	88.697	91.617	125.6	2.242	1.792	1.784	1.789	1.8		177.782	125.6	0.8697
CEJTAO	89.307	90.165	124.981	116.734	91.241	177.145	86.931	118.224	91.075	91.481	2.212	1.766	1.754	1.766	1.749		177.145	124.981	0.8694
VOXJUN	93.848	87.219	175.438	92.022	123.274	117.985	89.703	83.771	93.648	118.438	1.776	2.188	1.762	1.774	1.777		175.438	123.274	0.8694
LENTUV	174.567	83.199	92.706	115.906	120.768	91.376	90.453	84.838	122.431	97.753	2.251	2.01	1.791	1.795	1.788		174.567	122.431	0.868933
SUNGEO	92.2	91.161	124.503	119.215	91.081	176.637	89.6	116.277	88.586	87.333	2.193	1.921	1.915	1.913	2.174		176.637	124.503	0.8689
HENXIH	85.384	89.926	115.725	123.194	97.9	175.306	86.59	119.259	95.301	84.591	2.391	2.219	2.194	2.203	2.414		175.306	123.194	0.868533
DPPTFE	89.337	118.557	92.097	91.636	126.133	89.137	178.233	115.227	89.27	88.685	2.303	1.802	1.758	1.827	1.8		178.233	126.133	0.868333
CIRHOA	87.541	86.207	121.435	121.094	90.172	173.53	90.656	117.415	91.184	94.187	2.192	2.03	1.739	1.749	2.184		173.53	121.435	0.86825
TIYVAY01	92.904	92.06	119.579	122.78	84.464	174.854	92.304	117.111	86.42	92.061	2.215	1.798	1.8	1.79	2.082		174.854	122.78	0.8679
UDAMIV	176.863	89.014	89.559	115.014	120.141	88.673	90.023	90.505	124.835	92.49	2.242	1.764	1.768	1.782	1.749		176.863	124.835	0.867133
MUBTOS	83.909	92.331	119.003	116.872	94.497	176.037	96.645	124.01	86.26	86.606	2.364	2.201	2.198	2.207	2.037		176.037	124.01	0.867117
SAQQAE	90.101	92.941	177.801	89.189	116.522	117.647	89.935	89.006	88.989	125.796	1.803	2.284	1.776	1.786	1.784		177.801	125.796	0.86675
WITZUU	87.429	119.289	125.845	92.833	96.326	85.351	85.227	92.933	113.441	177.83	1.917	1.76	1.78	1.8	1.771		177.83	125.845	0.866417
GATQIB	124.068	87.382	88.681	91.046	90.3	91.177	91.267	114.112	176.053	121.809	2.165	1.8	1.816	1.795	1.806		176.053	124.068	0.866417
BUNXAL	81.669	121.088	92.014	94.604	117.539	93.507	173.037	120.585	92.266	86.172	2.257	1.777	1.791	1.78	1.785		173.037	121.088	0.865817
AZOCNI15	88.541	91.367	176.309	89.488	123.224	112.401	88.619	90.169	91.895	124.375	2.296	2.186	2.195	2.303	2.309		176.309	124.375	0.865567
SOYYOU	120.252	119.429	91.49	172.18	92.451	120.252	84.492	92.451	91.49	87.688	2.99	2.738	2.555	2.589	2.738		172.18	120.252	0.865467
AZOCNI16	88.239	91.22	176.258	89.455	123.367	112.3	88.595	90.683	91.827	124.333	2.295	2.19	2.199	2.298	2.311		176.258	124.333	0.865417
WAHGUJ	91.991	90.708	124.86	112.79	91.157	176.784	88.245	122.345	88.777	88.876	2.228	1.772	1.773	1.768	2.228		176.784	124.86	0.8654
AKAZIV	174.043	91.749	89.609	121.155	116.678	89.103	94.932	90.667	122.127	83.687	2.295	1.772	1.784	1.786	1.794		174.043	122.127	0.865267
TIYXAA	176.966	87.13	89.248	125.057	120.693	92.763	93.566	87.05	113.811	90.402	2.215	2.077	1.796	1.778	1.792		176.966	125.057	0.86515
ICFRNI	174.259	89.373	93.543	122.359	115.202	89.152	91.941	92.959	122.076	82.658	1.817	2.309	2.33	2.609	2.624		174.259	122.359	0.865
REHYOV	92.964	115.049	91.791	91.928	123.073	87.311	174.972	121.529	92.157	84.191	2.239	1.803	1.783	1.781	1.792		174.972	123.073	0.864983
EDASAF	175.753	83.347	78.549	114.556	116.432	95.92	98.501	85.654	123.856	98.394	1.938	2.324	1.965	1.947	1.96		175.753	123.856	0.86495
XUVDUO	117.827	123.653	93.645	175.531	91.023	118.477	88.966	89.832	89.388	86.927	1.787	2.225	1.798	1.785	1.788		175.531	123.653	0.864633
CMPIRP	87.235	98.226	177.43	93.021	118.264	125.579	91.892	89.535	80.319	115.871	1.806	2.295	2.345	1.941	1.89		177.43	125.579	0.864183
FIVBES	176.856	91.918	91.154	111.131	125.02	85.111	89.651	88.315	123.824	94.231	2.27	1.752	1.819	1.766	1.82		176.856	125.02	0.863933
XIPHOW	176.28	92.962	95.519	116.361	124.453	86.279	88.057	94.859	117.42	82.603	2.258	1.795	1.763	1.778	1.767		176.28	124.453	0.863783
TIYWED	176.901	87.111	89.727	125.079	119.436	94.533	91.947	87.191	115.126	89.712	2.218	2.088	1.789	1.787	1.795		176.901	125.079	0.8637
ZUYYIB	89.156	85.708	84.076	96.444	91.971	117.016	116.046	177.447	125.639	92.85	1.765	2.359	1.758	1.745	1.778		177.447	125.639	0.863467
TPIMCF	175.874	91.837	95.122	114.5	124.07	84.812	88.671	91.09	120.797	88.806	1.927	1.722	1.781	1.754	1.768		175.874	124.07	0.8634
ONEQAB	116.529	88.808	91.753	88.808	91.753	89.372	89.372	126.942	178.745	116.529	1.916	1.826	1.861	1.826	1.861		178.745	126.942	0.863383
REHYUB	84.833	125.619	119.961	92.29	91.999	89.015	89.475	92.642	113.931	177.411	2.31	1.784	1.788	1.792	1.803		177.411	125.619	0.8632
KAPMIZ	80.037	96.089	119.074	110.762	99.071	175.203	83.247	123.412	101.181	80.905	2.473	1.984	1.916	1.924	1.928		175.203	123.412	0.863183
LUYLUN	92.189	172.528	87.778	118.64	91.371	89.14	120.43	94.261	85.211	120.747	2.332	2.294	2.437	2.304	2.311		172.528	120.747	0.863017
PELFOB	123.825	86.276	120.36	92.568	175.606	91.419	115.775	89.451	90.476	90.11	1.766	2.226	1.792	1.792	1.783		175.606	123.825	0.863017
TIYWED02	176.844	87.076	89.761	125.064	119.48	94.599	91.945	87.036	115.079	89.811	2.218	2.09	1.788	1.788	1.793		176.844	125.064	0.863
COPHUK	96.882	85.534	174.174	90.907	118.862	118.706	88.93	85.655	92.033	122.398	1.784	2.127	1.744	1.773	1.763		174.174	122.398	0.862933
LATJOF	178.278	87.139	91.601	115.006	126.503	94.255	86.848	88.655	118.407	91.322	2.271	1.758	1.773	1.778	1.784		178.278	126.503	0.862917
KAGJEH	177.419	93.513	90.263	125.71	117.39	88.715	89.891	88.403	116.863	89.416	2.317	1.734	1.776	1.762	1.787		177.419	125.71	0.861817
GAYNEZ	85.992	94.557	177.489	91.508	117.624	116.538	92.647	87.584	87.938	125.783	2.255	1.879	2.166	2.255	2.236		177.489	125.783	0.861767
CAHCOP	86.29	79.197	173.839	97.205	114.371	122.164	99.829	79.2	97.953	117.208	2.194	1.412	1.704	2.195	2.176		173.839	122.164	0.86125
JAMTUM	89.102	124.95	93.729	93.566	123.398	86.372	176.578	111.087	90.427	87.199	2.332	1.827	1.722	1.832	1.756		176.578	124.95	0.860467
AGAHIA	84.876	85.133	175.708	95.757	118.081	124.094	95.527	87.871	91.123	116.311	2.241	2.145	1.99	2.245	2.239		175.708	124.094	0.860233
FUNCEW	88.945	90.527	177.342	90.475	118.037	116.11	93.465	87.205	89.419	125.73	1.861	2.167	2.15	1.87	1.869		177.342	125.73	0.8602
PYZTCI	175.78	93.452	91.771	124.172	121.125	90.059	88.886	86.918	114.669	89.264	1.774	2.031	1.807	1.806	1.815		175.78	124.172	0.860133
SIJJON	123.693	114.119	92.037	175.27	95.07	120.365	81.775	92.693	82.918	95.638	1.772	1.782	2.087	1.785	1.768		175.27	123.693	0.859617
RIJTEJ	87.934	89.817	122.848	119.078	88.309	174.417	87.329	118.024	89.602	97.259	2.25	1.758	1.758	1.759	1.752		174.417	122.848	0.859483
DODTOG	174.835	90.091	90.801	118.804	123.271	88.252	94.298	90.725	117.899	86.101	2.246	1.782	1.785	1.788	1.789		174.835	123.271	0.8594
NITZOF	91.399	87.193	174.224	92.559	122.661	122.612	90.282	91.756	87.246	114.727	1.746	2.204	2.202	1.754	1.749		174.224	122.661	0.859383
ADMTMO	90.038	78.625	80.375	94.611	100.398	117.373	116.404	173.197	121.646	96.339	1.897	2.321	1.888	1.963	1.916		173.197	121.646	0.859183
SIFJIC	90.882	116.591	90.811	83.706	122.164	92.252	173.712	121.132	92.405	90.236	1.781	1.793	2.026	1.794	1.801		173.712	122.164	0.859133
MSIPMO20	92.265	83.616	123.582	115.04	87.656	175.107	95.353	119.372	84.791	96.688	2.367	2.128	2.106	2.097	2.504		175.107	123.582	0.85875
EMAXAT	176.075	92.813	93.983	111.807	122.343	85.182	84.414	94.578	124.565	89.345	2.327	1.771	1.784	1.771	1.773		176.075	124.565	0.8585
TBPCFE	94.666	92.52	175.716	84.891	124.238	116.685	89.594	92.689	85.95	118.113	1.801	2.363	1.77	1.788	1.783		175.716	124.238	0.857967
JAHJOS	93.457	94.399	173.018	80.902	121.089	116.131	86.653	93.137	91.812	121.571	1.787	2.314	2.016	1.778	1.788		173.018	121.571	0.85745
ONEPEE	88.9	87.458	123.653	115.541	93.354	175.095	88.179	120.777	91.104	91.332	1.838	1.801	1.798	1.793	1.842		175.095	123.653	0.857367
NEQCER	93.606	89.811	113.972	123.074	86.313	174.488	91.252	122.874	91.309	88.199	2.197	1.792	1.799	1.8	1.791		174.488	123.074	0.8569
JIZSIU	88.708	91.134	116.414	126.729	90.41	178.108	88.824	116.847	89.557	91.344	2.212	1.779	1.787	1.8	1.798		178.108	126.729	0.856317
WIXLUK	89.789	114.282	124.265	89.741	92.378	91.298	86.347	90.831	121.373	175.642	2.24	1.782	1.793	1.791	1.806		175.642	124.265	0.856283
TIYVUS	177.742	86.861	87.984	126.368	118.461	95.397	91.117	87.478	114.582	91.391	2.207	2.081	1.785	1.78	1.785		177.742	126.368	0.856233
TIYVUS01	178.05	86.903	88.033	126.678	118.647	95.02	90.882	87.861	114.159	91.492	2.213	2.076	1.79	1.773	1.791		178.05	126.678	0.8562
WUWRAH	89.238	90.591	118.417	126.43	89.273	177.783	90.593	115.135	91.433	88.798	2.223	1.8	1.783	1.791	2.232		177.783	126.43	0.855883
LAJKEP	91.569	87.598	176.286	89.08	110.5	124.939	85.86	94.586	91.675	124.414	1.795	2.253	1.781	1.799	1.786		176.286	124.939	0.855783
TIYWUT01	177.136	87.264	89.085	125.806	119.965	92.993	93.417	86.949	113.771	90.456	2.214	2.089	1.796	1.794	1.79		177.136	125.806	0.8555
NUCBUJ	92.48	89.585	178.017	90.08	117.448	126.723	88.874	90.635	88.445	115.754	2.112	2.178	2.254	2.099	2.12		178.017	126.723	0.8549
ODUKUV	88.599	93.106	116.622	117.665	88.948	176.778	89.029	125.5	92.645	87.836	2.251	2.022	2.021	2.012	2.095		176.778	125.5	0.854633
ZEYWUV	95.76	92.024	177.012	94.127	114.504	125.75	85.024	82.977	89.845	119.722	2.201	2.103	1.933	2.341	2.253		177.012	125.75	0.854367
JOFJOD	92.395	176.918	88.67	125.665	88.294	89.443	119.918	88.694	92.558	114.415	1.792	2.267	1.799	1.78	1.792		176.918	125.665	0.854217
FASHEO	85.692	92.121	124.862	116.717	93.628	176.114	92.649	118.397	85.96	90.238	2.532	2.433	2.458	2.482	2.376		176.114	124.862	0.8542
JAJXUN	86.611	119.725	90.312	92.629	118.924	94.383	172.198	120.953	93.369	82.846	2.319	1.755	1.751	1.787	1.776		172.198	120.953	0.854083
MIYHUY02	89.136	90.116	114.863	120.388	90.425	175.76	89.648	124.516	94.452	86.563	2.626	2.288	2.264	2.279	2.577		175.76	124.516	0.854067
OTOKEP	88.894	88.539	175.597	93.476	124.361	112.513	89.281	90.877	88.46	123.102	2.315	2.131	2.124	1.791	2.319		175.597	124.361	0.853933
XETCOR	98.68	85.406	120.934	121.724	84.893	172.946	87.217	115.391	85.747	98.411	1.981	1.802	1.777	1.799	1.964		172.946	121.724	0.8537
MIYHUY	91.495	93.071	114.975	124.097	90.966	175.315	89.216	120.785	89.804	85.794	2.639	2.236	2.304	2.317	2.557		175.315	124.097	0.853633
BOBXOF	85.237	119.096	88.464	90.626	122.319	93.386	173.535	118.585	90.948	91.107	2.604	2.192	1.99	1.947	1.929		173.535	122.319	0.8536
CANTOC	90.779	116.87	123.21	92.799	93.946	88.285	81.644	92.774	119.015	174.412	1.993	1.809	1.775	1.798	1.794		174.412	123.21	0.853367
TUBFIF	175.302	93.741	89.769	124.117	118.525	90.929	87.637	88.839	117.311	89.375	2.331	1.772	1.757	1.786	1.771		175.302	124.117	0.853083
BRURMN	91.6	174.164	91.577	122.997	87.082	91.577	114.005	87.082	91.6	122.997	2.563	2.175	2.563	2.035	2.175		174.164	122.997	0.852783
BRURMN10	91.59	174.163	91.588	122.997	87.081	91.588	114.005	87.081	91.59	122.997	2.563	2.174	2.563	2.035	2.174		174.163	122.997	0.852767
TASZIW	89.728	124.027	87.575	89.728	124.027	92.41	175.179	111.946	92.41	87.575	2.247	1.795	2.247	1.795	1.734		175.179	124.027	0.852533
JAXHOF	89.274	90.09	123.608	117.068	87.859	174.76	92.084	119.319	92.599	87.918	2.435	1.816	1.78	2.383	2.438		174.76	123.608	0.852533
WEHVEL	85.14	96.603	116.49	115.927	96.559	176.855	86.874	125.707	90.003	84.488	2.405	2.214	2.218	2.214	2.414		176.855	125.707	0.852467
FOCXEA	173.131	90.166	94.797	118.33	121.986	83.742	90.961	91.487	119.276	89.067	2.261	1.727	1.744	1.757	1.761		173.131	121.986	0.852417
JOGDUG	111.25	124.375	91.033	175.509	87.519	124.375	91.033	91.503	87.99	91.503	2.371	2.371	2.122	2.13	2.338		175.509	124.375	0.852233
HEMCOR	92.717	125.942	90.113	90.037	113.633	84.656	177.056	120.219	94.339	87.838	1.993	1.8	1.798	1.783	1.784		177.056	125.942	0.8519
JUZWUW	175.224	91.45	90.281	124.14	114.754	90.165	85.036	91.757	120.987	91.648	2.224	1.763	1.816	1.792	1.806		175.224	124.14	0.8514
TERVOE	91.561	175.07	90.362	123.998	86.687	91.603	115.028	88.443	91.724	120.974	2.104	2.206	2.099	2.128	2.198		175.07	123.998	0.8512
YOVJEY	87.542	92.749	89.853	87.542	92.749	118.283	123.434	174.502	118.283	89.853	1.926	2.321	1.926	2.321	1.917		174.502	123.434	0.851133
PEQMOQ	176.383	93.022	92.273	125.33	121.044	90.419	85.342	91.693	113.143	87.483	2.319	1.783	1.809	1.774	1.783		176.383	125.33	0.850883
FIHBEE	90.122	124.913	118.504	93.926	91.428	84.65	86.96	92.906	115.906	175.965	1.945	1.764	1.785	1.8	1.795		175.965	124.913	0.850867
BIRVON	94.952	89.317	115.636	124.316	85.447	175.368	95.588	118.758	84.146	90.912	2.137	1.741	1.767	1.773	1.948		175.368	124.316	0.850867
FUPYOF	117.681	90.895	124.336	91.608	175.384	87.797	117.982	91.031	90.768	87.594	2.314	1.746	1.744	2.178	2.182		175.384	124.336	0.8508
FUPYEV	91.221	93.341	121.205	123.46	87.732	174.503	90.266	115.325	89.993	87.544	2.181	1.742	1.74	2.313	2.184		174.503	123.46	0.850717
NIMYEP	83.5	118.918	89.137	91.43	121.599	91.063	172.636	119.381	92.563	92.125	2.493	2.192	1.987	1.94	1.951		172.636	121.599	0.850617
DERGEM	94.81	85.171	117.056	115.06	84.98	178.28	88.991	127.248	92.549	93.676	1.856	2.207	2.167	2.186	1.88		178.28	127.248	0.850533
TIYWUT	176.846	87.845	89.161	125.819	119.608	92.782	93.396	86.951	114.197	90.054	2.214	2.087	1.802	1.79	1.776		176.846	125.819	0.85045
URUHUL	173.486	88.381	91.569	119.963	122.521	94.923	91.931	82.835	116.954	90.657	2.226	2.117	1.792	1.777	1.794		173.486	122.521	0.849417
TARROW	175.816	86.623	78.998	124.866	109.491	95.82	96.827	82.847	120.704	99.479	2.088	2.489	1.977	1.995	2.011		175.816	124.866	0.849167
CAHCOP01	173.416	76.753	88.519	117.051	122.481	98.259	97.517	80.266	114.243	99.175	1.73	1.49	2.174	2.166	2.143		173.416	122.481	0.848917
DAFBOE	89.505	87.989	87.504	90.09	93.531	114.061	126.643	177.561	119.041	91.613	1.803	2.229	1.791	1.79	1.809		177.561	126.643	0.848633
CUCHAJ	85.25	85.28	170.067	102.847	115.89	119.156	99.813	67.224	99.468	114.877	2.204	1.644	1.659	2.226	2.215		170.067	119.156	0.848517
VILRUD	91.955	113.451	91.237	87.09	123.274	91.237	174.181	123.274	91.955	87.09	1.822	1.777	1.822	1.729	1.777		174.181	123.274	0.84845
UTITOI	174.718	88.176	97.966	118.582	123.843	91.806	86.726	85.018	117.57	90.614	1.785	1.998	1.821	1.784	1.794		174.718	123.843	0.847917
PERMOP	176.121	90.219	90.435	119.611	115.106	90.521	86.03	90.946	125.258	92.187	2.274	1.775	1.788	1.804	1.791		176.121	125.258	0.847717
FALFUT	87.527	90.933	117.893	118.716	89.325	174.232	96.978	123.381	88.657	86.888	2.267	1.773	1.811	1.782	1.768		174.232	123.381	0.847517
DUGMAU	90.968	88.058	174.747	89.461	120.183	115.734	87.864	86.94	97.063	123.914	2.334	2.087	1.886	2.341	2.375		174.747	123.914	0.847217
KADBOG	176.438	91.064	85.87	113.563	125.619	87.268	92.276	90.824	120.78	92.706	1.691	2.315	1.804	1.812	1.766		176.438	125.619	0.846983
DERMAO	92.505	91.407	116.828	120.903	91.258	173.082	86.617	122.264	86.526	91.475	2.18	1.771	1.779	1.78	2.182		173.082	122.264	0.846967
VOXJUN	85.5	86.527	178.154	89.597	127.336	117.5	95.946	88.759	93.806	114.329	1.765	2.165	1.765	1.773	1.749		178.154	127.336	0.846967
VILRAL	92.914	86.667	90.671	92.914	86.667	122.544	114.911	173.335	122.544	90.671	2.212	2.179	2.212	2.179	2.215		173.335	122.544	0.846517
HAPXOO	92.273	88.762	173.717	87.814	122.939	116.366	93.977	88.449	89.034	120.692	2.214	2.087	2.099	2.218	2.217		173.717	122.939	0.8463
CUYGUY	87.867	88.051	119.865	118.462	89.203	172.418	96.551	121.641	91.023	87.504	2.169	1.777	1.796	1.802	1.804		172.418	121.641	0.846283
UGUDAC	173.201	86.288	85.123	118.128	117.324	96.892	98.123	84.079	122.449	89.121	2.417	2.406	2.215	2.224	2.212		173.201	122.449	0.845867
HOGREA	85.802	93.645	173.317	91.614	115.372	122.063	87.645	90.81	90.941	122.566	2.197	1.842	1.87	2.227	2.235		173.317	122.566	0.84585
QEVHIJ	124.849	116.801	90.788	175.593	94.732	118.123	85.022	88.072	89.583	92.136	1.935	1.941	1.971	1.966	1.931		175.593	124.849	0.845733
WEHVEL	84.502	96.669	116.693	117.276	97.887	174.694	85.514	123.965	89.346	85.666	2.41	2.206	2.22	2.216	2.41		174.694	123.965	0.845483
CAFKOJ	89.903	176.637	92.767	114.857	84.503	88.504	118.785	94.045	90.596	125.918	1.875	2.265	2.274	2.262	2.229		176.637	125.918	0.845317
WOPTOL	90.19	86.704	123.781	119.576	96.123	174.497	91.606	116.629	86.361	89.329	2.247	1.803	1.783	1.798	1.963		174.497	123.781	0.845267
TCTPIR	92.066	90.167	175.398	88.018	124.71	111.935	92.066	88.018	90.167	123.355	1.945	2.367	2.367	1.863	1.906		175.398	124.71	0.8448
PAGDUZ	89.887	86.599	122.15	120.989	92.81	172.834	88.97	116.765	87.621	94.349	2.373	2.039	2.039	2.025	2.37		172.834	122.15	0.844733
FMPFEC	175.366	90.986	86.189	124.699	113.656	93.298	90.063	90.112	121.554	89.784	1.803	2.174	1.798	1.794	1.798		175.366	124.699	0.84445
JOZSEW	86.662	122.806	88.474	89.932	112.594	87.242	175.134	124.471	95.512	92.716	2.266	1.765	1.765	1.764	2.308		175.134	124.471	0.844383
CEBPNI	92.789	86.705	111.814	121.739	87.749	177.035	89.573	126.38	93.328	90.204	1.816	2.25	2.267	2.244	1.852		177.035	126.38	0.84425
MEPCAM	88.36	91.786	174.891	92.461	114.989	124.263	86.573	90.686	90.531	120.742	1.803	1.813	1.815	1.784	1.802		174.891	124.263	0.8438
QEBXIG	90.258	88.653	177.046	92.305	115.45	126.419	89.276	90.488	89.276	118.127	1.938	2.36	2.362	1.947	1.938		177.046	126.419	0.843783
MOWGEK	79.624	175.361	81.822	109.076	93.544	101.576	122.247	89.372	93.806	124.764	2.259	2.512	2.054	2.018	2.078		175.361	124.764	0.843283
HANPOD	97.121	88.296	124.012	111.901	87.157	174.58	89.355	123.584	87.431	89.997	2.313	2.14	2.13	2.129	2.329		174.58	124.012	0.8428
MEGJEP01	105.37	126.749	84.578	177.269	93.011	126.749	84.578	93.776	89.72	93.776	2.419	2.419	1.996	2.035	2.285		177.269	126.749	0.842
JAZJAW	75.671	106.28	106.969	122.542	96.814	173.041	85.623	120.034	99.995	76.602	1.234	2.138	2.136	2.132	2.146		173.041	122.542	0.84165
ATAPOB	87.317	98.929	88.964	88.529	88.06	122.493	120.321	172.971	116.92	88.282	1.776	2.31	1.783	1.77	1.814		172.971	122.493	0.8413
MEGJEP02	105.318	126.769	84.581	177.218	93.12	126.769	84.581	93.74	89.662	93.74	2.434	2.434	2.006	2.048	2.3		177.218	126.769	0.840817
KARVII	88.594	88.648	126.569	113.064	91.35	177.013	89.268	120.351	91.453	91.034	1.91	1.889	1.902	1.893	1.901		177.013	126.569	0.840733
UMUXUW	88.128	95.102	87.094	95.102	87.094	125.83	125.83	176.257	108.34	88.128	2.331	2.02	2.378	2.02	2.378		176.257	125.83	0.84045
UQORIC	91.445	94.405	119.832	121.535	92.188	171.936	86.288	118.572	85.989	89.877	1.94	2.14	2.159	2.159	1.871		171.936	121.535	0.840017
RAWVEQ	173.18	88.664	87.254	121.368	115.798	91.239	87.068	92.287	122.795	93.893	1.763	2.347	1.797	1.801	1.78		173.18	122.795	0.83975
AGUYUX	119.493	95.025	120.148	91.78	170.604	85.935	120.253	90.262	92.267	84.701	2.445	2.062	2.055	2.544	2.458		170.604	120.253	0.839183
GISDER	117.402	85.461	92.473	85.461	92.473	92.24	92.24	125.195	175.52	117.402	2.277	1.865	2.12	1.865	2.12		175.52	125.195	0.83875
TOCXUE	121.542	117.604	92.6	171.863	83.232	120.731	85.168	89.39	88.859	100.504	2.319	2.336	2.352	2.292	2.294		171.863	121.542	0.838683
AGUZAE	90.134	119.877	119.538	92.437	85.994	84.812	91.721	94.955	120.471	170.787	2.508	2.063	2.056	2.424	2.433		170.787	120.471	0.8386
DONQED	87.491	91.16	124.328	118.089	90.826	174.628	91.621	117.472	84.843	94.41	2.209	1.894	1.898	2.061	2.264		174.628	124.328	0.838333
UGUDEG	85.1	97.731	117.136	116.789	96.426	174.36	84.787	124.061	89.578	85.929	2.403	2.223	2.216	2.218	2.416		174.36	124.061	0.838317
EHIZUS	86.471	93.353	116.919	117.349	93.47	174.944	91.01	124.645	93.569	82.508	2.292	1.783	1.785	1.77	1.786		174.944	124.645	0.838317
MIYHUY01	89.25	89.914	114.699	119.999	90.528	175.36	90.001	125.076	94.494	86.22	2.622	2.278	2.248	2.277	2.572		175.36	125.076	0.838067
WEHNUS	93.999	90.342	117.137	124.971	84.452	175.255	95.187	115.738	81.102	95.363	1.83	1.81	1.784	1.791	2.301		175.255	124.971	0.838067
TICVIM	91.355	93.28	124.768	121.429	88.765	175.008	86.255	113.777	89.578	91.062	2.474	2.083	2.09	2.084	2.51		175.008	124.768	0.837333
UGUFAE	85.244	95.644	119.114	115.739	98.504	173.653	85.474	123.416	88.616	86.172	2.381	2.21	2.229	2.213	2.403		173.653	123.416	0.837283
EJUTUY	86.901	88.311	124.963	117.443	92.428	175.192	93.45	117.593	89.651	89.405	2.097	2.051	1.993	1.979	2.081		175.192	124.963	0.83715
FIVBES	175.725	87.993	87.247	109.192	125.517	88.719	92.423	92.338	125.222	91.795	2.253	1.754	1.785	1.79	1.642		175.725	125.517	0.8368
LEJWON	88.493	88.471	175.461	91.87	115.843	125.264	90.221	92.563	88.718	118.889	1.797	1.865	1.869	1.791	1.791		175.461	125.264	0.836617
SIZWOO	125.324	95.832	86.362	89.358	93.332	85.684	89.847	113.698	175.507	120.783	1.796	1.957	1.758	1.882	1.821		175.507	125.324	0.836383
MINCOP	115.985	91.311	89.479	91.311	89.479	89.098	89.098	128.031	178.197	115.985	1.887	1.868	1.844	1.868	1.844		178.197	128.031	0.8361
RAGHOW	174.453	94.225	92.377	124.296	111.865	82.868	85.365	87.368	123.67	98.093	1.847	1.869	1.806	1.837	1.724		174.453	124.296	0.83595
COQJAU	93.106	85.173	91.745	93.106	85.173	120.196	119.607	170.346	120.196	91.745	1.982	2.254	1.982	2.254	1.972		170.346	120.196	0.835833
EZUCOR	95.113	89.96	118.481	124.767	88.69	174.914	90.033	116.622	87.855	88.715	2.036	1.822	1.801	1.8	1.766		174.914	124.767	0.835783
WAFYUY	177.616	86.876	87.562	127.471	111.535	94.962	90.196	87.856	120.397	92.87	2.331	2.051	1.964	1.986	1.996		177.616	127.471	0.83575
CIMFAF	177.472	89.043	89.643	119.423	113.175	90.981	92.352	88.583	127.33	89.083	2.07	2.206	2.1	2.06	2.111		177.472	127.33	0.8357
WEHVEL	86.782	97.167	116.353	118.055	96.628	173.818	84.479	123.716	89.496	85.03	2.403	2.204	2.22	2.207	2.415		173.818	123.716	0.835033
QUGFAZ	93.657	92.274	120.341	117.463	92.15	172.282	86.297	122.186	86.446	88.869	1.926	2.14	2.199	2.139	1.932		172.282	122.186	0.834933
FEHVUJ	97.954	88.961	116.081	122.53	90.463	172.588	86.927	121.354	92.443	83.676	2.338	1.736	1.714	1.744	2.225		172.588	122.53	0.8343
IWEVOX	85.681	89.661	117.026	120.174	95.522	172.74	95.21	122.737	81.945	91.683	2.213	1.742	1.748	1.763	2.189		172.74	122.737	0.833383
BEFHUS	91.568	91.411	118.207	125.149	90.871	175.131	86.989	116.643	88.21	91.234	2.286	1.921	1.965	1.944	2.253		175.131	125.149	0.833033
RATSOV	100.246	89.99	175.021	82.793	125.067	115.306	84.084	97.314	85.908	116.646	1.792	2.229	2.081	1.782	1.772		175.021	125.067	0.832567
ONORIT	84.381	93.723	176.41	91.939	113.049	120.467	93.468	91.651	84.879	126.476	2.283	2.333	2.332	2.261	2.304		176.41	126.476	0.832233
COFZUS	90.701	87.125	117.027	115.331	86.215	177.294	90.569	127.365	91.854	93.836	1.923	2.343	2.317	2.331	1.987		177.294	127.365	0.83215
COFZUS10	90.701	87.125	117.027	115.331	86.215	177.294	90.569	127.365	91.854	93.836	1.923	2.343	2.317	2.331	1.987		177.294	127.365	0.83215
QAVQOT	92.125	94.997	122.704	121.818	89.22	172.63	86.184	115.418	88.371	89.434	2.255	1.816	1.772	1.761	1.748		172.63	122.704	0.8321
ONEPEE	90.731	89.997	123.461	118.231	92.479	173.372	87.606	118.294	86.498	92.975	1.851	1.806	1.798	1.796	1.85		173.372	123.461	0.83185
EWOBOH	89.832	120.568	95.016	89.832	120.568	85.234	170.469	118.864	85.234	95.016	2.951	2.049	2.951	2.049	2.08		170.469	120.568	0.831683
UGALOF	90.288	88.926	175.447	86.25	115.947	118.48	87.92	91.396	95.608	125.568	2.211	2.103	2.392	2.209	2.208		175.447	125.568	0.831317
DEZZUD01	88.03	87.476	173.04	90.212	119.402	123.161	86.849	96.332	91.383	117.413	2.24	2.528	2.523	2.196	2.238		173.04	123.161	0.831317
JIZSAM	124.243	119.387	87.245	174.114	92.896	116.357	89.989	87.362	91.804	91.096	2.221	1.783	1.805	1.804	1.798		174.114	124.243	0.831183
SAVHIG	90.964	86.637	172.398	92.684	119.094	122.581	90.334	93.292	86.353	118.319	2.216	2.622	2.655	2.195	2.207		172.398	122.581	0.830283
LEJNOG	89.831	95.992	176.711	88.78	126.908	118.372	92.762	88.304	84.555	114.52	1.792	2.19	1.806	1.793	1.808		176.711	126.908	0.83005
BIZFUL	127.31	88.676	127.028	89.163	177.098	89.198	105.658	88.516	93.114	91.921	1.985	2.007	1.971	2.173	2.159		177.098	127.31	0.8298
GEFLUZ	89.095	89.712	176.805	92.303	114.571	118.35	87.745	89.229	92.198	127.038	1.788	1.931	2.264	1.81	1.799		176.805	127.038	0.82945
LEJWON01	88.659	88.408	115.716	118.781	88.44	175.247	92.128	125.495	92.514	90.219	1.869	1.793	1.794	1.802	1.865		175.247	125.495	0.8292
JASROL	175.607	89.265	94.023	116.17	125.88	87.896	90.263	93.159	117.554	85.801	2.224	1.794	1.8	1.788	1.791		175.607	125.88	0.828783
XUDJEL	92.444	91.36	122.593	126.255	89.459	175.981	87.029	111.149	89.832	90.375	2.155	1.838	1.667	1.806	2.099		175.981	126.255	0.828767
GEPVEF	87.689	89.658	175.112	93.583	125.423	117.452	88.693	90.991	89.094	117.102	2.299	2.358	2.362	2.249	2.234		175.112	125.423	0.82815
FIHSOE	92.442	87.334	124.83	121.175	91.602	174.447	89.906	113.665	85.679	93.567	2.254	1.79	1.778	1.791	2		174.447	124.83	0.82695
TICTUW	89.313	90.187	172.625	90.448	117.57	123.046	85.079	96.469	88.868	119.051	2.083	2.365	2.414	2.07	2.112		172.625	123.046	0.826317
CAYFAJ	89.329	87.157	114.545	119.648	89.367	175.322	93.149	125.745	91.121	90.182	2.232	1.798	1.802	1.79	1.785		175.322	125.745	0.826283
FOGSUP	92.212	122.811	115.07	95.548	91.086	81.767	85.979	93.881	121.041	172.386	2.191	1.775	1.772	1.74	1.74		172.386	122.811	0.82625
AKAZIV	173.187	91.277	88.848	123.618	120.162	92.117	84.353	89.374	116.217	94.02	2.312	1.761	1.789	1.798	1.799		173.187	123.618	0.82615
GERYUX	90.057	117.917	125.187	86.023	92.946	91.434	89.354	90.509	116.89	174.712	2.338	1.763	1.835	1.736	1.768		174.712	125.187	0.825417
SAQPUX	92.214	120.001	114.209	88.196	86.255	89.92	91.629	92.272	125.657	175.156	2.274	1.8	1.789	1.763	1.786		175.156	125.657	0.824983
XAPZOD	175.414	92.193	89.224	125.928	115.709	92.362	89.079	89.343	118.36	88.205	2.234	1.786	1.783	1.792	1.777		175.414	125.928	0.824767
CNTPNI	87.777	90.463	116.212	116.75	90.03	176.488	92.368	127.013	91.136	88.605	1.836	2.223	2.261	2.223	1.86		176.488	127.013	0.824583
GECREL	88.993	92.714	176.765	84.223	127.305	116.102	93.797	93.076	87.532	116.33	2.308	2.109	2.122	2.32	2.334		176.765	127.305	0.824333
DIWROQ	87.502	89.489	118.826	113.659	92.124	176.727	89.491	127.312	93.09	88.678	2.226	1.782	1.793	1.78	1.787		176.727	127.312	0.823583
PEHFAJ	90.928	174.192	87.112	124.782	91.16	90.104	121.011	93.629	87.458	114.186	2.221	1.803	1.765	1.794	1.8		174.192	124.782	0.8235
BAGSIO	88.665	92.5	174.763	88.032	118.796	115.818	90.987	87.91	92.355	125.372	1.794	1.821	1.818	1.812	1.799		174.763	125.372	0.823183
BAGSIO	87.754	92.352	174.178	90.187	115.946	119.216	86.772	91.312	92.049	124.823	1.842	1.826	1.837	1.809	1.802		174.178	124.823	0.822583
GUXFEL	86.478	127.927	95.205	86.478	127.927	88.634	177.269	104.146	88.634	95.205	2.374	2.402	2.374	2.402	2.29		177.269	127.927	0.822367
FAZDUF	91.971	124.345	92.578	92.803	123.604	83.492	173.685	111.741	90.323	89.577	2.234	1.805	1.757	1.79	1.783		173.685	124.345	0.822333
KAQMAT	86.115	87.829	117.947	120.278	88.977	171.1	94.104	121.761	94.495	88.673	2.268	1.971	1.716	1.724	2.267		171.1	121.761	0.822317
YIBZUG	118.492	87.479	126.255	90.927	175.576	91.589	115.252	88.105	91.467	90.754	1.95	1.759	1.778	1.898	1.891		175.576	126.255	0.822017
MIMFET	176.729	90.028	93.446	116.171	115.83	91.928	83.283	94.345	127.41	87.163	1.952	1.794	1.78	1.791	1.799		176.729	127.41	0.821983
JUZWUW	91.663	117.722	115.23	91.182	87.885	92.207	85.857	91.513	127.046	176.361	2.232	1.806	1.776	1.787	1.799		176.361	127.046	0.821917
ULOVAU	88.391	90.401	116.588	115.913	91.43	176.486	89.498	127.183	93.993	86.677	2.229	1.784	1.802	1.791	1.796		176.486	127.183	0.821717
ECAJEY	89.958	90.166	179.626	89.851	115.639	130.325	89.958	89.851	90.166	114.036	1.986	1.94	1.94	2.074	1.99		179.626	130.325	0.821683
JOFJOD01	88.062	114.539	88.353	92.059	118.73	92.351	176.003	126.717	90.744	88.67	2.245	1.758	1.774	1.803	1.793		176.003	126.717	0.821433
MAPCFF10	88.877	88.477	116.261	117.805	89.601	175.148	95.406	125.869	89.412	88.654	2.212	1.761	1.758	1.758	2.211		175.148	125.869	0.821317
UGUDOQ	85.043	96.956	118.151	115.879	97.914	173.235	84.553	123.957	88.815	86.22	2.397	2.216	2.217	2.218	2.415		173.235	123.957	0.8213
PFPRHB	80.305	91.357	71.138	100.033	98.015	113.788	118.184	169.602	120.326	99.84	2.351	1.609	2.326	2.154	2.339		169.602	120.326	0.821267
ZUXPUD	119.776	91.687	123.5	90.987	172.765	86.352	116.714	91.37	92.79	86.437	2.096	2.429	2.396	2.338	2.344		172.765	123.5	0.821083
TIBSIG	88.357	90.83	178.399	90.109	127.032	103.822	90.623	91.493	88.214	129.138	2.345	2.14	2.168	1.941	2.328		178.399	129.138	0.821017
LATNEA	82.125	87.086	176.347	84.491	125.449	127.094	99.527	98.161	89.327	107.351	2.145	2.217	2.192	2.136	2.168		176.347	127.094	0.820883
PAYREM	175.598	90.864	87.169	126.347	116.497	91.236	95.312	89.812	117.102	85.788	2.369	1.756	1.779	1.792	1.786		175.598	126.347	0.82085
IMPONI	125.036	122.611	89.289	174.28	90.506	112.237	86.412	94.603	90.924	87.92	2.658	2.166	2.185	2.189	2.664		174.28	125.036	0.820733
CARQET	86.385	91.574	174.061	91.778	110.478	124.832	87.726	90.936	92.424	124.666	1.754	2.202	2.202	1.78	1.776		174.061	124.832	0.820483
TAZCFE	175.6	87.497	91.142	118.524	115.097	89.828	87.631	92.249	126.373	92.048	2.013	1.764	1.813	1.81	1.808		175.6	126.373	0.82045
PEHFAJ	89.959	91.842	174.138	87.088	124.942	114.094	90.965	87.472	93.064	120.956	2.221	1.791	1.796	1.767	1.775		174.138	124.942	0.819933
WUVZEU	93.242	90.96	171.901	86.235	122.713	120.778	92.216	85.976	91.383	116.508	1.748	2.174	2.172	2.025	1.752		171.901	122.713	0.8198
CEMXIB	95.744	174.861	86.108	117.121	89.691	88.779	125.708	90.41	89.273	117.118	2.215	1.788	1.803	1.784	1.805		174.861	125.708	0.819217
CEMXIB10	95.744	174.861	86.108	117.121	89.691	88.779	125.708	90.41	89.273	117.118	2.215	1.788	1.803	1.784	1.805		174.861	125.708	0.819217
NUXRIJ	172.54	90.422	92.386	119.796	123.397	91.791	93.051	78.344	115.915	94.508	2.218	2.057	1.786	1.762	1.774		172.54	123.397	0.81905
BOKVIH	174.783	89.837	89.627	120.167	125.644	89.605	95.335	87.358	114.077	88.753	1.761	2.305	1.794	1.794	1.779		174.783	125.644	0.818983
GOXYUN	88.135	85.84	124.685	112.542	90.311	173.779	89.312	122.753	92.84	94.255	2.147	1.739	2.16	2.151	2.184		173.779	124.685	0.818233
RIJQIN	82.66	85.359	78.879	93.822	102.174	113.231	122.396	171.466	118.898	97.794	1.954	2.435	1.949	1.966	1.954		171.466	122.396	0.817833
NOQPAK	91.195	92.287	114.179	125.683	88.017	174.745	88.372	120.025	86.612	93.646	1.899	2.131	2.157	2.103	1.903		174.745	125.683	0.8177
ZOCYUL	89.014	88.641	174.416	92.025	119.787	125.368	90.996	93.038	86.799	114.843	2.221	2.032	2.041	2.222	2.221		174.416	125.368	0.817467
LIBVOH	87.806	86.205	118.33	118.07	89.482	172.559	93.635	123.58	93.093	90.156	2.22	1.764	1.776	1.771	2.215		172.559	123.58	0.816317
PPCAIR10	115.986	114.167	101.386	174.845	80.078	125.867	93.735	82.694	95.296	87.217	1.867	2.37	2.375	1.637	1.832		174.845	125.867	0.8163
NTPPMN	85.534	90.122	170.214	94.477	121.26	120.047	86.238	94.115	89.418	118.693	1.784	2.277	2.278	1.728	1.752		170.214	121.26	0.8159
QIGZIP	172.332	97.359	95.536	114.843	123.39	79.002	92.132	96.744	117.873	79.937	2.367	1.814	1.799	1.789	1.78		172.332	123.39	0.8157
XIBSIN	174.289	90.013	90.249	125.402	109.993	94.983	84.64	90.085	124.604	90.803	2.006	1.778	1.786	1.794	1.799		174.289	125.402	0.814783
ZUXPUD	119.64	91.098	123.71	90.957	172.585	85.728	116.647	92.509	92.426	86.857	2.085	2.412	2.428	2.343	2.323		172.585	123.71	0.814583
PEMLEA	177.151	89.874	88.234	128.278	114.075	92.695	89.484	88.738	117.537	91.338	1.802	2.24	1.796	1.794	1.793		177.151	128.278	0.81455
NUCBOD	88.784	176.436	92.535	116.34	89.474	87.706	115.955	92.174	89.563	127.593	2.115	2.168	2.088	2.09	2.248		176.436	127.593	0.81405
OQEJEA	175.423	91.018	86.104	115.822	117.507	84.783	94.93	95.993	126.601	87.58	2.295	2.44	2.235	2.187	2.24		175.423	126.601	0.8137
DIWROQ	86.138	89.488	124.019	113.549	91.303	172.813	86.491	122.394	91.249	95.855	2.237	1.79	1.787	1.782	1.792		172.813	124.019	0.813233
FIRBIR	92.162	91.689	176.814	88.273	107.524	124.35	88.439	88.893	90.553	128.039	2.024	2.212	2.277	2.015	2.044		176.814	128.039	0.812917
FALTAN	110.395	88.268	124.797	94.313	173.569	88.268	124.797	88.062	92.118	88.062	2.6	2.6	1.706	2.247	2.256		173.569	124.797	0.812867
UGALOE	92.006	91.735	127.469	123.257	89.554	176.223	88.509	109.274	88.805	89.698	2.378	1.915	1.919	1.904	2.378		176.223	127.469	0.812567
SAGWIJ	88.52	90.038	174.454	92.668	113.748	125.7	86.514	91.982	90.854	120.551	1.914	2.331	2.331	1.917	1.906		174.454	125.7	0.812567
YOPZUY	174.831	95.104	94.211	126.081	121.617	85.907	90.148	92.45	110.944	82.726	2.471	2.206	2.322	2.302	2.34		174.831	126.081	0.8125
COMPFF	91.435	114.009	93.739	88.981	125.011	89.779	173.757	120.836	91.304	85.365	2.21	1.792	1.77	1.787	1.786		173.757	125.011	0.812433
KISNUX	123.071	90.52	128.065	90.994	176.798	87.939	108.837	91.521	89.689	88.879	2.296	1.741	1.723	2.176	2.176		176.798	128.065	0.812217
ODOHIY	92.125	113.378	89.638	84.667	120.977	94.643	173.987	125.268	89.927	89.625	2.337	1.791	1.775	1.785	1.815		173.987	125.268	0.811983
NIRKEE	171.929	91.374	94.18	116.793	119.094	86.561	80.497	93.948	123.217	93.872	2.509	1.763	1.793	1.784	1.774		171.929	123.217	0.811867
UCIKIB	89.386	93.23	176.17	90.268	111.811	120.72	88.99	87.969	90.582	127.468	1.878	2.146	2.125	1.884	1.93		176.17	127.468	0.8117
XUCXUQ	90.244	93.165	126.88	116.558	87.477	175.564	84.292	116.504	91.388	93.543	2.1	1.947	1.947	2.015	2.115		175.564	126.88	0.8114
VIVCUY	176.422	88.959	91.003	114.785	117.404	87.584	90.384	92.43	127.763	89.982	2.314	1.778	1.756	1.805	1.785		176.422	127.763	0.810983
QEVHEF	119.713	125.096	85.551	173.748	96.027	114.292	86.191	94.762	88.863	88.242	1.75	1.832	1.703	1.801	1.794		173.748	125.096	0.810867
WEZKER	87.059	90.701	125.1	118.347	94.922	173.721	82.889	115.707	93.639	91.334	2.461	1.814	1.793	1.776	1.76		173.721	125.1	0.81035
FAGFEY	87.524	118.123	124.225	90.513	89.668	97.415	87.107	88.241	117.627	172.845	2.266	1.769	1.779	1.761	1.825		172.845	124.225	0.810333
FAGFEY10	87.524	118.123	124.225	90.513	89.668	97.415	87.107	88.241	117.627	172.845	2.266	1.769	1.779	1.761	1.825		172.845	124.225	0.810333
COHVOK	79.05	172.309	89.356	116.715	93.596	93.314	123.748	90.871	94.211	118.291	1.778	2.152	1.775	1.78	1.762		172.309	123.748	0.80935
YIHBOG	89.517	91.059	179.134	88.768	130.582	111.734	90.947	90.369	89.448	117.672	2.805	2.336	2.336	1.867	1.868		179.134	130.582	0.8092
RUTYEK	114.123	87.426	89.369	86.493	89.895	97.052	89.882	121.169	173.054	124.51	2.255	1.773	1.799	1.781	1.789		173.054	124.51	0.809067
NAGNIS	89.332	111.562	120.48	89.45	91.676	89.797	86.988	93.254	127.789	176.326	2.251	1.784	1.773	1.777	1.779		176.326	127.789	0.80895
PPHCHN10	94.635	96.893	118.789	119.836	96.021	168.36	73.383	116.36	99.481	80.217	1.665	2.197	2.209	2.19	1.832		168.36	119.836	0.808733
KOPPEK	89.878	91.409	174.095	90.165	123.079	110.777	87.664	95.629	84.453	125.598	2.646	1.805	1.857	2.252	2.643		174.095	125.598	0.808283
GENWOM	172.859	85.53	85.464	114.752	118.857	95.234	99.862	84.876	124.391	88.552	2.421	2.396	2.204	2.22	2.218		172.859	124.391	0.8078
TORXUT	90.778	121.834	116.744	93.607	85.488	84.939	92.899	92.754	121.396	170.262	2.381	1.932	1.932	2.383	2.339		170.262	121.834	0.807133
NEYHUX	82.811	88.244	173.678	93.397	111.269	125.323	91.027	91.134	94.207	122.686	2.467	2.025	2.067	2.501	2.522		173.678	125.323	0.805917
NEPZUG	92.914	87.386	174.744	88.704	126.396	118.686	92.015	90.871	88.651	114.91	1.878	1.827	1.825	1.849	1.846		174.744	126.396	0.8058
QUGDIF	116.981	92.5	115.246	92.053	176.063	88.426	127.746	88.522	90.95	87.723	2.4	2.088	2.105	1.933	1.904		176.063	127.746	0.805283
ZURDEV	87.172	87.745	117.003	117.347	90.379	173.953	93.03	125.65	92.195	89.923	2.203	1.757	1.774	1.765	2.209		173.953	125.65	0.80505
QACVEY	172.783	97.348	92.543	124.481	113.376	88.679	80.93	92.71	120.601	88.507	2.241	1.786	1.774	1.767	1.776		172.783	124.481	0.805033
UCIKOH	90.687	88.037	116.648	128.645	91.568	176.924	87.36	114.704	90.71	91.509	2.238	1.92	1.895	1.891	2.266		176.924	128.645	0.80465
REHZAI	91.041	120.244	113.503	90.404	88.263	88.172	88.27	94.429	126.178	174.45	2.248	1.792	1.78	1.794	1.805		174.45	126.178	0.804533
EBAKIC	87.948	94.757	120.003	114.952	88.996	172.361	88.82	124.097	95.973	83.581	2.273	2.096	2.097	2.116	2.191		172.361	124.097	0.8044
UCIVUZ	176.209	94.026	87.561	108.598	123.363	85.122	90.051	90.9	127.953	92.653	1.981	1.991	1.917	1.907	1.918		176.209	127.953	0.804267
EDASUZ	85.98	173.892	80.153	125.647	97.552	99.353	118.308	83.124	94.618	111.53	1.929	2.282	1.952	1.939	1.931		173.892	125.647	0.804083
AGUZAE	90.37	119.025	118.36	91.973	86.473	84.311	92.356	94.755	122.522	170.754	2.507	2.052	2.046	2.423	2.433		170.754	122.522	0.803867
AGUYUX	118.503	94.983	119.216	92.45	170.382	86.365	122.174	90.263	92.014	84.046	2.452	2.064	2.057	2.545	2.456		170.382	122.174	0.803467
BALWUG	94.011	94.55	118.853	123.232	87.783	171.436	89.61	117.893	86.475	88	2.158	1.877	1.809	1.758	2.153		171.436	123.232	0.8034
TOMNAK	175.89	85.156	88.955	114.906	127.689	90.738	93.057	87.047	116.563	95.341	2.256	2.008	1.788	1.772	1.767		175.89	127.689	0.80335
DEZZUD	87.412	87.799	171.867	90.483	117.44	123.687	91.202	97.209	86.304	118.831	2.252	2.525	2.512	2.181	2.253		171.867	123.687	0.803
FIVBIW	86.745	126.24	119.657	92.877	88.529	90.028	92.642	89.754	114.094	174.411	2.238	1.797	1.795	1.79	1.791		174.411	126.24	0.80285
VUPHUJ	95.194	119.179	91.083	88.734	125.562	87.423	173.71	115.246	89.158	88.962	2.252	1.782	1.793	1.791	1.793		173.71	125.562	0.802467
ZUWGOP	172.405	93.091	81.608	124.294	115.829	90.096	90.825	94.421	119.859	90.383	2.221	1.982	1.76	1.783	1.79		172.405	124.294	0.80185
TMDPFE	90.45	86.254	90.549	89.579	89.587	116.95	127.361	175.446	115.63	93.09	1.787	2.264	1.776	1.709	1.776		175.446	127.361	0.801417
KIHSOJ	96.181	86.945	118.22	125.707	88.076	173.77	88.598	115.089	85.174	95.434	2.12	1.764	1.696	1.734	2.205		173.77	125.707	0.80105
OQEHUO	87.206	83.597	172.402	97.673	119.149	114.772	96.132	85.972	88.806	124.351	2.199	2.403	2.4	2.236	2.217		172.402	124.351	0.80085
SUFGEF	87.99	98.39	119.029	124.993	87.104	173.035	88.525	115.632	90.789	87.612	2.295	1.804	1.602	1.748	1.692		173.035	124.993	0.8007
ETEBAG	86.67	128.459	94.848	96.324	115.22	84.112	176.495	114.5	92.478	85.893	2.324	2.097	2.173	2.108	2.113		176.495	128.459	0.8006
PEHDUB	88.232	89.446	129.653	111.982	91.308	177.678	92.006	118.365	89.481	89.788	2.25	1.783	1.777	1.783	1.752		177.678	129.653	0.800417
TOMNAK01	175.9	88.941	87.064	127.876	116.427	93.032	95.353	85.224	114.867	90.679	2.256	2.008	1.771	1.769	1.791		175.9	127.876	0.8004
ZUWGEF	171.05	91.398	94.881	121.024	123.056	92.658	90.57	77.786	115.474	93.322	2.194	2.044	1.785	1.757	1.764		171.05	123.056	0.7999
EDASEJ	120.662	111.284	101.044	168.621	85.236	120.662	95.518	85.236	101.044	73.102	2.002	1.929	1.91	2.37	1.929		168.621	120.662	0.799317
BMPONI	123.443	92.097	124.312	92.728	172.261	86.759	112.243	91.982	90.399	85.506	2.457	2.187	2.239	2.18	2.181		172.261	124.312	0.79915
DEZZUD02	90.407	97.435	118.916	123.781	87.669	171.714	91.186	117.259	87.371	86.355	2.513	2.186	2.254	2.256	2.526		171.714	123.781	0.798883
WEZKER	86.284	91.996	126.122	117.197	96.028	174.052	85.848	115.985	90.588	89.84	2.454	1.765	1.762	1.764	1.743		174.052	126.122	0.798833
YIKTAO	86.686	88.545	126.872	118.868	90.761	174.769	89.038	114.239	92.107	93.157	2.197	2.321	1.747	1.757	2.198		174.769	126.872	0.798283
RCOHPH	84.072	97.804	116.72	115.841	94.753	168.403	85.12	120.536	104.016	74.611	1.607	2.315	2.316	2.338	1.829		168.403	120.536	0.797783
KADBOG	90.287	118.538	115.148	89.917	89.555	85.24	95.349	89.817	126.309	174.131	2.252	1.743	1.76	1.752	1.78		174.131	126.309	0.797033
ONORIT	93.486	84.105	176.082	92.397	128.264	120.797	84.29	91.41	94.25	110.906	2.309	2.349	2.327	2.272	2.271		176.082	128.264	0.796967
UTOKEV	77.985	96.954	113.666	125.127	97.109	172.926	91.409	117.495	95.18	81.116	1.579	1.821	1.8	1.802	2.184		172.926	125.127	0.79665
CEZKIB	90.727	87.963	175.731	92.517	114.721	127.962	88.473	91.576	89.222	117.316	1.925	2.33	2.332	1.896	1.88		175.731	127.962	0.79615
COPSFE	92.679	117.955	93.476	90.334	125.719	88.079	173.469	116.323	87.109	88.893	1.785	2.262	1.791	1.785	1.775		173.469	125.719	0.795833
FERMEU	88.515	118.718	98.263	89.208	125.305	88.417	173.027	115.833	86.89	89.299	2.225	1.559	1.588	1.866	1.681		173.027	125.305	0.795367
FERMEU10	88.515	118.718	98.263	89.208	125.305	88.417	173.027	115.833	86.89	89.299	2.225	1.559	1.588	1.866	1.681		173.027	125.305	0.795367
JODFOX	88.195	91.833	175.25	89.941	111.667	127.544	87.214	91.36	91.931	120.776	2.35	2.343	2.345	2.413	2.394		175.25	127.544	0.7951
HCPDNB10	91.297	87.99	90.457	86.965	87.691	116.53	118.683	172.486	124.786	96.133	1.797	1.805	1.826	1.825	1.798		172.486	124.786	0.795
WEZKER	85.865	93.029	126.691	116.659	93.474	174.384	83.929	115.865	92.357	91.961	2.461	1.786	1.758	1.782	1.752		174.384	126.691	0.794883
MUSWII	88.186	115.278	95.241	91.905	128.316	86.963	175.975	115.313	93.459	84.709	2.326	1.764	1.754	1.763	1.759		175.975	128.316	0.794317
UGUDUW	85.978	93.458	114.251	114.899	95.116	177.233	85.41	129.579	92.362	87.319	2.385	2.235	2.206	2.221	2.412		177.233	129.579	0.794233
NECVEZ	94.332	124.182	115.734	93.619	85.835	92.09	94.296	80.392	118.944	171.832	1.761	1.657	1.887	2.435	1.748		171.832	124.182	0.794167
REHYUB	88.136	89.991	128.731	118.023	93.386	176.371	87.622	113.06	91.128	90.208	2.32	1.791	1.793	1.785	1.777		176.371	128.731	0.794
SEVCOL	83.673	116.061	93.667	94.285	116.311	91.258	173.528	125.901	95.209	82.599	1.973	1.806	1.814	1.79	1.819		173.528	125.901	0.793783
NOCGIV	91.529	127.544	116.012	94.947	89.117	87.81	89.765	87.385	116.435	175.165	2.231	1.798	1.794	1.779	1.788		175.165	127.544	0.793683
SAQBER	87.774	85.614	172.833	95.067	125.22	121.279	98.087	86.435	87.806	112.424	2.235	2.058	1.775	2.234	2.271		172.833	125.22	0.79355
DERMES	86.205	119.215	124.438	89.26	92.481	95.508	87.311	89.794	116.327	172.01	2.255	1.796	1.791	1.781	1.785		172.01	124.438	0.792867
CIKWOI	125.516	89.001	92.365	91.189	94.698	86.782	86.899	110.409	173.075	124.074	2.208	1.768	1.787	1.794	1.795		173.075	125.516	0.79265
YUMMAW	174.732	94.816	89.117	127.177	116.53	90.432	88.161	89.597	116.195	88.457	2.34	1.941	1.932	1.935	1.938		174.732	127.177	0.792583
XENLIN03	89.87	88.414	129.788	129.788	88.414	177.317	90.991	100.414	91.691	89.87	1.879	2.081	2.062	2.081	1.881		177.317	129.788	0.79215
REHYOV	174.434	90.398	92.273	114.714	118.155	85.561	87.117	91.928	126.924	93.353	2.242	1.788	1.79	1.794	1.791		174.434	126.924	0.791833
TAFMIW	89.581	91.356	124.907	119.678	92.449	172.383	84.968	115.377	88.301	93.977	2.166	1.751	1.681	2.209	2.186		172.383	124.907	0.791267
FOWLEJ	90.336	172.191	87.724	117.755	94.253	87.503	124.841	93.404	87.358	117.389	2.516	2.619	2.567	2.469	2.704		172.191	124.841	0.789167
AFOWUO	88.16	94.286	88.033	94.286	88.033	129.004	129.004	176.32	101.992	88.16	2.489	2.01	2.571	2.01	2.571		176.32	129.004	0.7886
APUBUK	91.653	127.692	114.621	88.863	86.398	90.931	96.116	86.655	116.988	175.001	2.267	1.786	1.8	1.77	1.785		175.001	127.692	0.788483
LUYLOH	117.205	90.769	119.083	85.264	170.307	98.004	123.026	84.741	89.446	91.689	2.224	2.399	2.367	2.404	2.316		170.307	123.026	0.788017
VIDMIE	92.801	87.264	175.258	93.389	120.173	128.013	89.403	89.692	88.071	111.812	1.776	2.283	1.779	1.776	1.796		175.258	128.013	0.787417
DUSSIT	120.955	88.274	123.611	88.646	170.834	95.87	115.431	88.949	85.625	93.049	2.187	1.671	1.663	2.167	2.178		170.834	123.611	0.78705
LOJCUK	87.561	92.651	170.119	94.764	118.751	122.935	82.563	89.648	92.964	118.314	2.73	2.485	2.466	1.79	1.79		170.119	122.935	0.7864
NICPCO	91.136	90.301	105.081	127.206	88.115	174.851	91.276	127.702	93.124	87.094	2.184	1.814	1.815	1.779	2.17		174.851	127.702	0.785817
CNTPOT	89.657	83.884	109.15	124.473	94.324	173.508	91.688	126.361	89.824	90.024	2.399	2.019	1.831	1.665	2.406		173.508	126.361	0.785783
UZODET	87.336	90.343	92.628	92.628	87.336	127.609	116.196	174.743	116.196	90.343	1.772	2.213	1.77	2.213	1.772		174.743	127.609	0.785567
EDIDAZ	84.598	126.943	92.216	85.556	113.987	88.954	174.072	118.989	88.976	100.359	2.023	1.75	1.747	1.773	2.027		174.072	126.943	0.785483
POBFAO	86.389	86.566	115.552	122.264	91.932	169.354	95.302	122.06	94.934	85.067	2.481	2.098	2.067	2.092	2.471		169.354	122.264	0.784833
JAKBAY01	89.535	85.117	174.869	90.372	127.804	112.669	94.589	84.976	96.075	118.345	1.805	2.046	1.764	1.77	1.776		174.869	127.804	0.784417
NECVEZ	89.316	119.163	94.197	92.011	122.828	79.562	169.88	117.576	90.451	94.771	2.372	1.772	1.761	1.78	1.782		169.88	122.828	0.7842
LATJOF	176.269	88.46	87.814	115.514	115.244	88.38	92.653	93.693	129.239	89.448	2.265	1.777	1.774	1.782	1.783		176.269	129.239	0.783833
LUKDAW	123.392	90.176	118.765	94.748	170.342	84.337	117.758	91.546	92.748	86.783	2.754	1.978	1.979	2.029	2.01		170.342	123.392	0.7825
LOJCUK	86.717	88.106	169.16	95.054	122.237	121.929	83.933	93.946	92.186	115.816	2.723	2.479	2.475	1.789	1.772		169.16	122.237	0.78205
VUJZIL	91.597	92.136	116.7	129.333	89.366	176.239	88.646	113.965	89.267	89.538	2.019	2.225	2.172	2.169	2.015		176.239	129.333	0.781767
BIGKEI	95.468	168.907	93.044	122.005	90.141	91.566	116.161	78.866	91.531	121.732	1.896	2.229	1.895	1.893	1.971		168.907	122.005	0.7817
MEGJEP	94.234	93.145	177.593	89.538	121.764	106.459	84.422	92.85	85.337	130.703	2.408	2.032	1.994	2.294	2.437		177.593	130.703	0.7815
TINXIX	95.325	122.85	117.369	93.691	89.069	81.506	87.41	93.251	119.43	169.71	2.624	1.788	1.754	1.729	1.789		169.71	122.85	0.781
HEXSEI	103.567	83.201	171.284	92	121.614	113.854	84.44	80.671	96.815	124.43	2.261	2.455	2.369	2.258	2.255		171.284	124.43	0.7809
XENLIN02	90.003	88.29	130.571	130.571	88.29	177.375	90.954	98.845	91.671	90.003	1.883	2.078	2.058	2.078	1.884		177.375	130.571	0.780067
CORCIX	94.056	91.951	110.078	127.011	87.253	173.777	86.767	122.89	92.699	88.121	2.104	2.017	2.002	2.006	2.084		173.777	127.011	0.779433
QACVAU	90.947	125.772	111.632	92.194	91.737	81.075	89.925	94.917	121.815	172.537	2.231	1.771	1.773	1.8	1.779		172.537	125.772	0.779417
XATHIL	89.098	89.125	126.754	115.552	91.589	173.509	87.961	117.674	88.102	94.765	2.355	1.912	1.914	1.919	2.341		173.509	126.754	0.77925
JARHOZ	87.772	88.718	174.89	92.214	128.147	109.56	89.862	92.879	87.806	122.293	2.321	2.162	2.145	1.807	2.333		174.89	128.147	0.77905
FIPYEI	88.086	85.32	125.82	107.929	97.673	172.831	89.572	126.089	92.005	88.482	2.215	1.757	1.806	1.761	1.949		172.831	126.089	0.779033
JAKBAY	88.65	176.49	85.93	129.757	92.284	94.856	117.438	86.253	92.575	111.889	1.787	2.053	1.774	1.763	1.775		176.49	129.757	0.778883
QACTUM	172.332	92.199	94.245	118.338	125.601	83.743	93.376	91.228	115.491	85.897	2.278	1.778	1.782	1.776	1.77		172.332	125.601	0.77885
VELLUT	80.892	114.949	124.352	88.087	94.214	94.297	89.897	93.09	120.436	171.081	2.201	2.19	1.764	1.778	1.782		171.081	124.352	0.778817
TOMXUP	86.161	93.582	170.668	92.995	115.021	123.961	84.571	90.844	92.495	121.017	2.321	2.227	2.228	1.862	1.853		170.668	123.961	0.77845
FERMEU	174.443	91.628	88.377	127.751	119.43	93.169	92.345	90.806	112.815	84.393	2.239	1.706	1.77	1.733	1.835		174.443	127.751	0.7782
MEGJEP03	94.154	93.131	177.617	89.577	121.222	106.786	84.559	92.779	85.334	130.952	2.404	2.029	1.992	2.295	2.434		177.617	130.952	0.77775
QUGCIE	116.1	120.279	91.295	170.249	84.379	123.618	93.324	91.647	86.109	93.724	2.305	2.223	1.886	1.901	2.343		170.249	123.618	0.777183
KIWKEI	89.879	88.903	115.993	120.314	87.983	170.249	97.376	123.673	91.85	84.646	2.232	1.802	1.804	1.794	1.788		170.249	123.673	0.776267
PORPER	89.67	88.843	125.954	117.073	92.343	172.526	87.267	116.953	87.679	94.86	2.224	1.755	1.779	1.783	2.207		172.526	125.954	0.7762
ZEDSOS	92.005	90.918	130.527	98.924	88.604	177.077	89.496	130.527	88.604	89.496	1.881	2.052	2.079	2.079	1.896		177.077	130.527	0.775833
KELCEJ	88.774	90.703	117.557	118.789	85.29	170.202	94.931	123.653	93.983	86.858	2.281	1.723	1.689	1.989	2.272		170.202	123.653	0.775817
HAYROQ	90.87	83.132	174.252	93.773	127.705	122.506	93.417	88.434	91.33	109.082	2.401	2.005	2.078	2.347	2.389		174.252	127.705	0.775783
BIYTEI	172.112	88.012	95.653	118.585	125.576	88.428	92.234	88.126	115.821	88.224	1.772	2.31	1.791	1.775	1.774		172.112	125.576	0.7756
BDFPCO	111.644	122.276	94.551	172.567	87.724	126.06	89.587	92.847	87.713	88.36	2.382	2.122	2.159	2.159	2.367		172.567	126.06	0.775117
ZUWGIJ	77.142	82.569	94.242	91.288	98.543	127.048	118.628	173.542	111.162	97.27	1.76	2.075	1.78	1.994	1.772		173.542	127.048	0.7749
ERAZUU	115.188	91.871	123.699	92.679	170.089	83.671	121.066	92.811	91.982	86.432	2.453	2.029	2.039	2.253	2.245		170.089	123.699	0.773167
SARSAG	91.012	90.003	105.724	127.372	86.295	173.729	92.233	126.894	93.448	88.148	2.102	2.16	2.184	2.111	2.113		173.729	127.372	0.772617
PUKYID	86.949	115.807	90.733	86.949	115.807	92.661	174.678	128.386	92.661	90.733	2.351	1.901	2.351	1.901	1.898		174.678	128.386	0.771533
XIXHOC	125.972	105.898	87.555	174.341	88.162	128.064	83.548	91.787	97.426	92.314	1.884	2.177	2.153	1.888	1.916		174.341	128.064	0.771283
XAMMUT	98.649	87.063	117.137	115.527	84.755	172.734	92.243	126.46	89.101	88.225	2.386	2.357	2.356	2.349	2.406		172.734	126.46	0.771233
JAKBAY01	90.457	84.438	175.748	95.302	129.526	113.904	93.55	84.254	92.63	115.209	1.804	2.049	1.775	1.777	1.769		175.748	129.526	0.770367
CARQET	91.96	90.76	171.615	86.426	125.451	109.706	93.481	85.231	93.402	124.771	1.782	2.202	2.206	1.755	1.781		171.615	125.451	0.7694
XIHRAH	175.922	88.664	87.683	129.759	118.174	95.378	90.339	85.27	111.293	93.271	2.206	2.088	1.792	1.764	1.806		175.922	129.759	0.769383
MADCOM	90.683	93.719	118.197	129.069	91.031	175.223	85.362	112.436	90.916	89.001	2.328	1.8	1.789	1.801	1.784		175.223	129.069	0.769233
ZUWGIJ	89.54	75.738	89.741	97.791	98.567	126.027	113.261	172.139	118.167	89.546	1.773	2.079	1.786	1.998	1.762		172.139	126.027	0.768533
UTOKIZ	86.597	117.467	127.458	93.107	93.512	92.925	84.371	90.268	114.619	173.56	1.959	1.764	1.789	1.848	1.855		173.56	127.458	0.768367
YIKSUH	88.928	87.615	94.43	94.065	87.691	125.219	124.375	171.305	110.4	87.806	2.623	2.259	2.219	2.235	2.653		171.305	125.219	0.7681
KADBOG	170.761	89.235	89.9	117.099	118.199	83.284	89.915	91.694	124.698	96.61	2.328	1.792	1.755	1.78	1.762		170.761	124.698	0.767717
MOWHEL	80.59	171.046	91.302	109.518	93.058	103.05	124.994	78.128	93.168	121.372	2.257	2.505	2.037	2.038	2.085		171.046	124.994	0.767533
MOPNMN10	89.103	89.644	116.603	113.966	89.752	175.476	93.767	129.431	90.681	87.689	2.312	1.649	1.639	2.356	2.303		175.476	129.431	0.767417
MPPHNB10	89.646	89.605	178.756	90.617	116.656	110.628	90.302	90.331	89.251	132.715	2.349	2.273	2.263	2.339	2.374		178.756	132.715	0.76735
ECAJEY	89.944	90.145	179.71	89.942	112.823	113.447	89.944	89.942	90.145	133.731	2.003	1.936	1.936	1.991	2.04		179.71	133.731	0.766317
ISAXEG	92.964	120.524	115.379	94.327	84.189	86.381	88.111	94.767	124.016	169.968	1.841	1.819	1.819	1.844	1.824		169.968	124.016	0.765867
XEBWIL	95.19	91.52	115.66	127.107	88.916	173.027	88.152	117.165	87.234	89.702	2.353	1.917	1.911	1.911	2.339		173.027	127.107	0.765333
RAXVUI	85.585	87.392	95.317	93.234	90.957	125.153	117.335	171.067	117.463	88.201	1.891	2.341	2.41	2.353	1.866		171.067	125.153	0.765233
RELFUJ	86.276	93.504	127.76	116.62	90.179	173.6	86.629	115.571	88.462	95.69	1.909	2.355	2.331	2.341	1.913		173.6	127.76	0.764
HIJRAT	86.165	170.867	88.324	125.071	93.253	89.59	116.053	95.879	86.279	118.87	2.379	2.175	2.398	2.039	2.176		170.867	125.071	0.763267
XIBTEK	172.563	89.641	89.84	126.796	126.741	95.911	93.315	89.038	106.438	83.678	2.037	1.775	1.798	1.789	1.795		172.563	126.796	0.762783
RELFUJ01	86.181	93.626	127.822	116.809	90.063	173.574	86.613	115.321	88.446	95.83	1.906	2.355	2.34	2.343	1.91		173.574	127.822	0.762533
IGOFIV	94.911	88.987	113.996	129.107	87.309	174.834	91.87	116.72	89.631	87.909	2.313	1.756	2.237	2.281	2.369		174.834	129.107	0.762117
RATSIP	96.201	90.568	172.953	86.593	127.234	121.015	90.667	92.397	84.52	110.975	1.801	2.275	2.015	1.775	1.772		172.953	127.234	0.761983
DUYSUN	92.29	95.461	116.618	126.33	89.937	172.045	87.468	116.993	87.46	88.134	2.209	1.779	1.771	1.77	2.221		172.045	126.33	0.761917
FORZER	82.462	127.251	119.448	92.681	91.643	90.819	92.44	90.787	113.049	172.941	2.276	1.816	1.768	1.811	1.774		172.941	127.251	0.7615
POBFES	91.94	86.909	174.284	93.683	128.639	120.254	89.978	90.65	87.473	111.098	2.074	2.355	2.348	2.086	2.106		174.284	128.639	0.76075
UTOJOE	172.868	95.931	99.723	109.413	127.268	78.761	87.008	99.309	117.203	80.486	1.434	1.85	1.806	1.802	1.802		172.868	127.268	0.76
TAKBAI	89.821	89.242	116.902	113.998	90.832	174.455	90.159	128.874	95.138	85.505	2.299	1.795	1.785	1.795	1.769		174.455	128.874	0.759683
RATSIP01	173.066	90.478	86.704	127.492	120.883	96.295	92.243	84.777	110.885	90.452	2.278	2.011	1.778	1.774	1.803		173.066	127.492	0.759567
XANWER	91.074	122.6	109.875	93.319	89.903	83.079	91.962	91.637	127.303	172.866	2.483	1.791	1.79	1.759	1.78		172.866	127.303	0.759383
LOQFOM	173.385	92.362	90.461	127.921	113.147	94.086	87.713	87.961	118.928	88.149	2.212	1.772	1.805	1.69	1.746		173.385	127.921	0.757733
LEJNOG	93.237	92.218	88.885	89.178	84.388	116.619	114.851	173.815	128.356	92.907	1.795	2.197	1.799	1.803	1.794		173.815	128.356	0.75765
DILBEI	89.44	177.582	91.191	100.369	89.582	89.44	127.456	89.582	91.191	132.175	2.394	2.248	1.917	1.934	2.248		177.582	132.175	0.756783
MCINIF	174.42	88.721	90.887	114.092	129.056	88.67	94.692	87.749	116.766	90.067	2.016	1.743	1.803	1.795	1.773		174.42	129.056	0.756067
DOTHEB	115.886	89.531	93.268	89.531	93.268	86.795	86.795	128.228	173.591	115.886	2.021	2.048	2.201	2.048	2.201		173.591	128.228	0.75605
WEHNOM	168.106	94.835	95.48	122.75	116.238	97.055	78.98	93.928	118.97	80.568	2.371	1.834	1.794	1.795	1.81		168.106	122.75	0.755933
OFUXAP	171.831	89.591	89.515	126.477	115.48	96.472	92.482	85.448	117.73	86.998	2.141	1.9	1.949	1.944	1.943		171.831	126.477	0.7559
CUNYAN	175.179	92.988	89.065	123.391	106.29	90.495	86.144	95.484	129.841	86.726	2.334	1.778	1.804	1.779	1.777		175.179	129.841	0.755633
QIRZUM	174.387	88.634	94.089	115.522	129.108	88.258	91.465	90.414	115.296	87.922	2.263	1.784	1.787	1.782	1.79		174.387	129.108	0.75465
PHPCMN	85.55	90.78	126.775	118.001	95.197	172.032	89.148	115.139	87.39	92.765	2.248	1.796	1.79	1.801	1.797		172.032	126.775	0.754283
TICVOS	86.617	93.426	168.242	89.038	114.582	122.31	86.394	86.854	98.3	122.996	2.109	2.326	2.337	2.1	2.052		168.242	122.996	0.7541
WEHNOM	81.224	122.697	114.123	96.753	94.857	78.619	95.397	94.024	120.741	167.847	2.361	1.792	1.821	1.817	1.783		167.847	122.697	0.7525
RUMQUM	90.346	96.547	118.989	127.974	92.104	173.107	83.815	111.77	92.842	85.266	2.238	1.768	1.772	1.758	1.78		173.107	127.974	0.752217
MADFAB	85.43	90.291	119.933	109.459	92.011	175.427	90.196	130.316	93.344	89.534	2.234	1.783	1.808	1.788	1.791		175.427	130.316	0.75185
QUGCAW	90.447	87.097	93.215	90.447	87.097	129.099	101.801	174.194	129.099	93.215	2.67	1.879	2.67	1.879	2.71		174.194	129.099	0.751583
JIZGEF	98.643	86.093	112.291	127.292	81.942	172.342	96.909	117.987	86.759	90.503	2.005	1.815	1.788	1.77	2.016		172.342	127.292	0.750833
FIPYEI	89.727	84.048	126.481	112.073	99.42	171.526	89.418	121.403	89.671	88.725	2.202	1.767	1.752	1.8	1.95		171.526	126.481	0.75075
YACZIN	85.146	131.839	116.468	95.796	92.328	87.98	87.024	92.323	110.664	176.848	2.229	1.802	1.786	1.818	1.804		176.848	131.839	0.75015
OZIVUQ	91.957	95.679	115.676	127.236	89.636	172.226	87.598	117.021	87.785	88.184	2.342	1.916	1.908	1.907	2.355		172.226	127.236	0.749833
DEDBEU	170.829	93.638	90.263	125.913	116.096	94.774	82.622	93.656	117.432	85.918	2.019	2.247	1.779	1.789	1.786		170.829	125.913	0.7486
HARKOA	91.583	90.644	132.686	101.217	89.7	177.6	90.384	126.056	87.446	89.715	2.113	1.891	1.897	1.88	2.114		177.6	132.686	0.748567
QARSOU	92.893	85.302	92.589	92.893	85.302	125.72	108.561	170.603	125.72	92.589	2.371	2.004	2.371	2.004	2.018		170.603	125.72	0.74805
VUJYUW	99.183	94.121	117.311	120.791	86.415	166.668	87.906	121.819	86.741	85.856	1.999	2.199	2.17	2.175	2.002		166.668	121.819	0.747483
HEXJUQ	88.367	89.009	115.893	112.999	89.992	175.95	91.823	131.102	92.098	89.409	2.168	2.587	2.667	2.584	2.167		175.95	131.102	0.747467
AZTPFE	88.477	92.215	175.849	90.147	121.43	107.556	88.868	89.189	91.628	131.012	1.818	2.266	2.261	1.702	1.767		175.849	131.012	0.747283
JURBIH	93.071	116.28	115.53	89.245	88.805	86.773	89.2	93.782	128.169	172.974	2.335	2.06	1.881	2.336	2.31		172.974	128.169	0.74675
WEHNOM	79.801	117.141	124.005	95.792	95.695	95.169	81.671	92.812	116.818	168.804	2.355	1.787	1.81	1.823	1.808		168.804	124.005	0.74665
VIVGOW	90.439	128.637	87.51	93.015	111.792	84.899	173.372	119.546	91.46	93.479	2.305	1.778	1.775	1.791	1.793		173.372	128.637	0.745583
RANDOA	91.4	90.834	114.253	121.544	85.909	168.888	96.498	124.19	92.499	83.833	2.237	1.792	1.8	1.798	2.236		168.888	124.19	0.744967
EHIFIL	86.905	91.732	175.342	88.127	106.11	123.222	90.178	91.018	92.904	130.66	1.841	1.83	1.826	1.845	1.834		175.342	130.66	0.7447
HAWLIA	86.969	116.276	126.969	90.29	89.966	98.222	87.694	87.738	116.711	171.604	2.244	1.745	1.766	1.762	2.258		171.604	126.969	0.743917
XIBQUV	92.049	169.237	92.946	117.682	84.619	92.946	124.636	84.619	92.049	117.682	2.732	2.427	2.732	2.17	2.427		169.237	124.636	0.74335
PPHCHN10	67.452	98.598	120.257	121.425	97.592	166.019	89.078	111.782	99.368	87.294	1.655	2.202	2.164	2.185	1.783		166.019	121.425	0.743233
EREJUG	171.413	96.235	84.806	126.834	110.065	90.836	87.262	93.675	122.959	88.446	2.341	2.117	1.91	1.929	1.916		171.413	126.834	0.742983
JEPTIH	113.205	87.784	128.303	86.321	172.866	97.756	118.287	90.037	89.7	89.347	2.414	1.903	1.905	2.143	2.364		172.866	128.303	0.742717
JALSIB	92.574	91.635	84.969	85.354	93.229	122.442	125.743	170.227	111.811	91.962	2.303	2.09	2.095	1.973	2.365		170.227	125.743	0.7414
KELQIB	165.66	85.54	87.049	117.937	121.237	84.633	89.042	96.604	120.818	97.416	2.196	2.195	2.132	2.093	2.132		165.66	121.237	0.740383
RODTIP	171.138	82.726	97.552	116.692	126.744	89.527	89.743	89.462	116.552	91.754	2.114	2.033	1.994	2.014	2.02		171.138	126.744	0.7399
QUGKOS	169.758	94.422	90.264	125.411	117.296	94.422	90.264	85.681	117.293	85.681	2.211	2.211	1.794	1.734	1.687		169.758	125.411	0.739117
YERWEX	94.54	94.349	165.698	82.915	119.705	118.823	92.515	82.791	93.117	121.447	1.662	2.298	2.29	2.126	1.662		165.698	121.447	0.737517
KOCPID	85.068	171.557	87.498	116.844	93.838	91.539	113.341	82.17	100.945	127.331	1.783	2.381	1.79	1.781	1.808		171.557	127.331	0.7371
APUBOE	86.245	89.506	117.173	115.486	89.352	171.475	95.895	127.326	92.62	87.36	2.202	1.787	1.794	1.788	1.79		171.475	127.326	0.735817
CEJTAO	85.769	89.64	128.882	113.758	94.622	172.999	89.071	117.236	89.703	92.181	2.208	1.759	1.768	1.756	1.759		172.999	128.882	0.735283
GOKXOT	88.728	102.96	164.826	82.574	120.011	118.196	85.136	88.702	92.165	120.733	2.002	2.191	2.46	2.017	1.993		164.826	120.733	0.734883
MUQKAM	90.502	91.258	178.461	89.712	134.423	109.815	90.686	90.655	87.418	115.698	2.258	2.243	2.243	2.27	2.268		178.461	134.423	0.733967
ETEBIO	172.65	93.7	99.36	116.34	128.613	85.026	87.778	91.541	113.079	83.661	2.293	2.177	2.096	2.098	2.111		172.65	128.613	0.73395
TICVEI	90.032	88.181	168.851	93.426	116.385	124.822	85.73	97.657	85.8	118.491	2.098	2.352	2.376	2.075	2.082		168.851	124.822	0.733817
VIVHAJ	85.828	129.638	116.695	96.858	89.596	91.612	88.389	88.591	113.485	173.639	2.297	1.8	1.814	1.81	1.753		173.639	129.638	0.73335
MAZOCT	115.985	127.357	84.671	171.354	91.526	115.985	93.238	91.526	84.671	95.408	2.282	2.339	2.1	2.139	2.339		171.354	127.357	0.733283
KAGJIL	94.604	93.674	109.76	126.338	85.95	170.308	92.555	123.876	89.38	85.255	2.291	1.745	1.794	1.75	2.192		170.308	126.338	0.732833
DIWRUW	92.612	130.409	110.621	93.873	89.166	85.267	89.696	90.237	118.89	174.345	2.244	1.777	1.781	1.784	1.79		174.345	130.409	0.732267
ODOZAI	87.183	87.975	106.104	124.784	95.481	172.894	87.922	129.031	88.428	91.609	2.422	2.168	2.162	2.247	2.404		172.894	129.031	0.73105
FIWSOU	165.572	83.404	87.093	116.949	121.093	84.914	91.904	95.834	121.799	97.439	1.872	2.11	2.136	2.096	2.186		165.572	121.799	0.72955
VUJXIJ	125.963	83.113	124.835	93.656	169.723	93.214	109.119	86.625	91.752	93.261	1.965	2.24	2.196	2.019	2.017		169.723	125.963	0.729333
PICOCO	96.961	82.592	129.802	115.433	91.401	173.436	88.626	113.726	86.674	94.757	2.098	1.972	1.969	1.98	2.094		173.436	129.802	0.727233
CUPCIB	91.268	89.656	174.948	85.334	131.402	121.527	92.45	90.307	91.312	107.06	2.409	1.994	1.993	2.139	2.282		174.948	131.402	0.725767
ODOHUK	91.18	88.423	177.799	89.584	134.279	123.677	90.949	90.517	89.932	102.043	1.76	2.257	2.252	1.782	1.762		177.799	134.279	0.725333
LOQFOM	172.088	93.854	89.008	128.577	116.326	94.031	87.056	87.415	115.096	89.677	2.228	1.854	1.831	1.823	1.832		172.088	128.577	0.725183
BEBPNI	86.86	86.056	94.068	98.224	85.385	115.882	123.946	167.398	120.098	88.573	2.465	2.225	2.183	2.227	2.505		167.398	123.946	0.7242
ZUYMAH	80.107	87.948	82.82	93.99	99.554	111.003	129.074	172.495	115.914	96.849	2.148	1.485	1.744	1.753	1.742		172.495	129.074	0.723683
UCUXUO	90.921	174.52	87.406	131.108	93.271	92.985	113.957	81.63	94.509	113.718	2.259	2.156	1.768	2.245	2.273		174.52	131.108	0.723533
CMPNIM	91.57	87.233	110.805	116.366	87.238	176.169	89.458	132.78	94.369	90.914	1.861	2.227	2.293	2.22	1.873		176.169	132.78	0.72315
WEQJUX	92.214	88.379	176.576	91.411	133.203	120.017	91.078	88.543	89.158	106.76	2.609	2.049	2.053	2.096	2.416		176.576	133.203	0.722883
LURMAM	87.617	87.844	118.401	112.875	88.615	171.976	94.717	128.717	93.262	89.066	1.809	1.801	1.788	1.79	1.829		171.976	128.717	0.720983
AYADEL	93.082	93.504	120.828	119.292	83.266	164.075	94.199	119.849	94.84	80.88	2.458	1.79	1.789	2.127	2.468		164.075	120.828	0.720783
FAWHAM	84.979	174.044	86.892	130.799	89.143	100.848	117.083	87.588	91.485	111.031	2.392	2.073	1.894	1.89	2.36		174.044	130.799	0.72075
TCTPIR	88.298	93.269	173.351	88.913	119.544	110.346	88.298	88.913	93.269	130.111	1.969	2.373	2.373	1.872	1.93		173.351	130.111	0.720667
JALSIB	92.077	91.206	84.633	85.595	93.441	126.835	126.555	170.037	106.585	92.181	2.271	2.092	2.102	1.977	2.368		170.037	126.835	0.720033
CEGHEB	94.662	91.257	86.111	87.143	88.723	113.213	118.506	171.389	128.261	93.256	2.226	1.807	1.767	1.786	1.788		171.389	128.261	0.7188
UFAPOG	89.449	87.69	92.378	89.431	92.997	128.461	134.856	177.978	96.681	88.635	2.036	2.196	2.113	2.177	2.024		177.978	134.856	0.7187
URCLCD	90.063	177.699	89.049	112.702	91.151	89.049	134.597	91.151	90.063	112.702	2.211	2.439	2.211	2.269	2.439		177.699	134.597	0.718367
UROBIO	89.85	89.274	115.814	109.839	91.272	177.398	91.027	134.311	91.56	87.587	2.227	2.26	2.238	2.25	2.213		177.398	134.311	0.718117
YIGYUI	92.846	94.197	111.165	129.763	89.511	172.764	86.2	118.984	89.709	88.527	2.374	1.922	1.922	2.012	2.363		172.764	129.763	0.716683
JUTMIU	83.867	166.895	90.846	118.575	93.276	83.564	124.029	95.787	93.114	117.396	2.419	1.926	1.918	1.877	1.948		166.895	124.029	0.714433
GIXDOH	94.246	82.752	92.697	94.246	82.752	118.674	122.652	165.503	118.674	92.697	1.969	2.076	1.969	2.076	2.072		165.503	122.652	0.714183
YERWIB	94.072	92.235	170.509	85.827	127.677	118.43	92.373	85.197	90.812	113.879	1.675	2.329	2.298	2.097	1.657		170.509	127.677	0.713867
SUYCAQ	98.498	96.88	119.404	119.038	80.368	164.367	81.396	121.553	93.49	89.174	2.427	1.92	2.389	2.398	2.428		164.367	121.553	0.713567
USOZAE	174.261	88.278	88.708	107.286	121.22	86.288	93.507	95.148	131.476	89.254	1.955	1.789	1.804	1.782	1.796		174.261	131.476	0.713083
LIDWOK	87.566	176.023	90.858	113.336	91.988	90.858	133.329	91.988	87.566	113.336	2.154	2.159	2.154	2.149	2.159		176.023	133.329	0.711567
NOQPOY	87.062	131.632	110.597	94.091	89.199	87.663	91.556	91.496	117.585	174.322	1.93	2.122	2.09	1.912	1.917		174.322	131.632	0.7115
XIPPOD	126.519	86.511	117.879	93.883	169.206	92.207	115.601	82.721	91.808	93.59	1.982	2.225	1.975	2.05	2.027		169.206	126.519	0.71145
NMPMNC	124.933	93.339	112.061	91.125	167.61	83.34	123.003	95.524	93.554	84.489	2.353	1.642	1.632	2.296	2.298		167.61	124.933	0.711283
REMKUP	171.435	87.768	92.814	115.631	128.776	89.064	95.732	88.689	115.579	87.097	1.771	2.228	1.791	1.77	1.795		171.435	128.776	0.710983
JALSIB	92.542	91.745	85.51	84.04	90.781	126.854	121.3	169.447	111.845	94.134	2.275	2.091	2.175	1.967	2.328		169.447	126.854	0.709883
NEZDON	93.129	94.589	123.538	123.538	94.589	166.025	81.061	112.8	84.964	93.129	2.274	2.21	2.198	2.21	2.263		166.025	123.538	0.708117
ELEGUX	95.632	171.519	89.267	129.142	88.599	92.742	115.805	86.65	88.289	115.047	1.76	1.83	1.826	1.823	1.83		171.519	129.142	0.706283
QEGMEW	82.574	94.327	164.499	94.527	116.893	120.966	81.927	93.498	93.835	122.141	2.603	2.361	2.343	2.166	2.168		164.499	122.141	0.705967
LECWOG	81.533	98.513	89.863	98.513	89.863	119.641	119.641	163.065	120.719	81.533	1.972	2.194	2.017	2.194	2.017		163.065	120.719	0.705767
SURHGC	95.941	81.018	115.675	108.969	87.042	176.958	65.542	134.635	115.731	95.153	2.238	3.096	2.609	2.368	2.362		176.958	134.635	0.705383
NMPOMN	123.841	92.719	111.577	91.365	166.866	83.406	124.575	95.111	95.543	83.477	2.351	1.665	1.65	2.291	2.294		166.866	124.575	0.70485
DEZZUD01	86.436	86.549	167.742	96.014	118.834	125.462	91.577	95.746	84.761	115.671	2.231	2.534	2.552	2.182	2.237		167.742	125.462	0.704667
SAKVAE	87.787	95.189	173.271	87.956	131.033	115.227	89.346	87.627	91.54	113.728	2.426	2.356	2.355	2.416	2.422		173.271	131.033	0.703967
NEGZIK	132.707	89.44	111.488	88.193	174.926	94.322	115.457	85.791	91.952	90.19	2.013	2.018	2.026	2.19	2.124		174.926	132.707	0.70365
SIZWII	93.514	87.918	171.905	87.063	129.804	115.089	93.944	86.932	91.765	115.053	1.787	1.772	1.79	1.766	1.792		171.905	129.804	0.701683
MONROX	136.56	85.266	89.618	178.651	89.39	136.56	81.246	89.39	89.618	100.103	2.261	1.866	1.975	2.041	1.866		178.651	136.56	0.701517
YOVYAK	88.631	86.512	95.348	95.515	85.537	118.118	114.936	168.99	126.943	88.412	1.734	2.179	2.247	2.182	2.052		168.99	126.943	0.700783
UTOJOE	171.54	102.082	94.299	129.497	105.589	84.17	77.574	98.021	119.285	85.606	1.395	1.834	1.786	1.815	1.803		171.54	129.497	0.700717
QUDWIV	86.527	172.035	98.631	130.109	86.018	98.631	99.782	86.018	86.527	130.109	2.553	2.323	2.553	2.437	2.323		172.035	130.109	0.698767
YOVYAK	88.797	85.634	168.766	95.372	126.869	118.372	88.335	95.693	86.182	114.759	1.731	2.175	2.178	2.247	2.045		168.766	126.869	0.698283
QARVUD	93.5	85.496	92.181	93.5	85.496	129.125	101.75	170.992	129.125	92.181	2.542	2.013	2.542	2.013	1.995		170.992	129.125	0.697783
FOCSOF	128.556	129.739	85.842	171.586	90.522	101.694	93.364	86.027	93.01	93.395	2.505	2.089	2.427	2.424	2.491		171.586	129.739	0.69745
FOCSOF10	128.556	129.739	85.842	171.586	90.522	101.694	93.364	86.027	93.01	93.395	2.505	2.089	2.427	2.424	2.491		171.586	129.739	0.69745
YERWEX	93.055	92.43	167.507	84.466	117.316	116.919	91.868	83.338	95.564	125.743	1.631	2.291	2.303	2.135	1.666		167.507	125.743	0.696067
FATLAN	90.015	88.131	134.795	108.595	93.145	176.501	88.421	116.591	90.779	90.338	2.194	1.673	2.207	2.169	2.211		176.501	134.795	0.6951
NIPYCU	85.229	134.293	91.956	85.229	134.293	92.012	175.976	91.415	92.012	91.956	2.018	2.154	2.018	2.154	2.063		175.976	134.293	0.694717
SUGDED	90.494	91.598	101.108	122.567	88.057	177.823	90.194	136.295	88.814	90.845	2.223	1.786	1.758	1.701	2.208		177.823	136.295	0.692133
KIWKEI	88.111	89.025	115.118	115.199	86.745	171.089	96.839	129.611	92.017	88.586	2.243	1.81	1.8	1.791	1.784		171.089	129.611	0.6913
CUYGUY	89.798	88.192	125.417	121.066	93.5	166.848	84.381	113.452	86.204	99.219	2.161	1.801	1.794	1.793	1.79		166.848	125.417	0.690517
ZAQVOF	93.482	94.282	87.878	88.404	92.901	110.417	131.382	172.806	117.941	84.374	2.24	1.79	1.756	1.766	2.214		172.806	131.382	0.6904
LOJCAQ	123.518	95.185	93.184	95.185	93.184	82.408	82.408	112.964	164.817	123.518	2.55	1.785	2.459	1.785	2.459		164.817	123.518	0.688317
YAHMUP	121.131	90.521	107.449	86.992	172.701	93.141	131.42	89.018	86.197	93.332	2.054	1.776	1.743	2.193	2.201		172.701	131.42	0.688017
LAPTEB	91.541	124.835	74.418	80.473	122.049	114.693	165.95	96.467	75.053	101.039	2.247	2.518	2.681	2.233	2.248		165.95	124.835	0.68525
BAWLES	89.723	127.714	88.725	88.071	135.923	89.201	177.02	96.249	89.736	94.627	2.04	2.163	2.035	2.08	2.004		177.02	135.923	0.68495
JALSIB	91.894	92.581	86.818	85.99	89.62	131.77	118.085	172.802	110.105	91.746	2.306	2.087	2.142	1.969	2.326		172.802	131.77	0.683867
PICOCO01	95.129	87.104	131.635	117.656	90.111	172.518	85.697	110.379	87.485	95.78	2.104	1.986	1.976	1.989	2.058		172.518	131.635	0.681383
WACTAV	92.473	87.299	177.748	89.765	136.917	104.231	88.485	87.987	94.443	118.747	2.257	1.994	1.997	2.29	2.285		177.748	136.917	0.680517
IVEWEM	79.49	56.059	82.438	114.702	101.683	106.847	109.987	157.355	116.549	106.202	1.97	2.325	1.92	1.932	1.975		157.355	116.549	0.6801
XENLIN01	90.855	91.675	125.687	97.616	88.383	177.47	90.516	136.681	88.026	89.762	1.885	2.055	2.111	2.046	1.887		177.47	136.681	0.679817
QINZUK	94.303	84.093	98.487	89.644	88.125	129.936	113.09	170.638	116.635	86.699	1.807	2.004	1.811	1.773	1.787		170.638	129.936	0.678367
UBAPOE	173.188	90.038	90.942	113.255	114.21	86.204	87.425	90.908	132.5	95.814	2.325	1.781	1.789	1.79	1.784		173.188	132.5	0.678133
QINZUK01	170.667	86.458	89.541	116.441	129.994	94.462	98.594	88.138	113.186	84.154	2.005	1.774	1.805	1.784	1.8		170.667	129.994	0.677883
UKIMEI	116.463	108.012	91.689	176.03	91.978	135.379	91.234	90.027	90.896	84.797	1.971	1.989	2.141	2.155	1.967		176.03	135.379	0.677517
DEZZUD	85.839	86.538	166.571	97.095	119.202	125.939	91.491	95.968	84.388	114.807	2.245	2.525	2.548	2.17	2.252		166.571	125.939	0.6772
MIZKAH	123.764	95.553	93.12	95.553	93.12	82.183	82.183	112.471	164.365	123.764	2.196	1.783	1.779	1.783	1.779		164.365	123.764	0.676683
LOJBOD01	116.597	91.734	117.018	95.833	166.94	86.725	126.351	96.04	89.924	80.417	2.418	1.783	1.775	2.447	2.448		166.94	126.351	0.676483
BMPNIB10	126.561	92.203	122.353	93.474	167.107	83.598	111.079	93.429	93.29	83.73	2.515	2.257	2.29	2.244	2.247		167.107	126.561	0.675767
PAHHIP	114.052	87.404	87.549	86.002	85.564	99.194	95.47	124.782	165.301	121.145	2.281	1.797	1.788	1.832	1.751		165.301	124.782	0.675317
NUNWOK	127.485	97.125	90.183	97.125	90.183	84	84	105.029	168	127.485	1.776	1.772	1.982	1.772	1.982		168	127.485	0.67525
LIVFUR	83.984	90.524	115.68	112.578	90.716	171.865	92.257	131.352	95.536	88.437	2.226	1.794	1.785	1.778	1.811		171.865	131.352	0.675217
IQOTOY	133.126	91.769	85.57	93.125	93.279	90.741	86.854	113.398	173.594	113.163	1.919	1.932	2.45	1.931	2.394		173.594	133.126	0.674467
MIZJEK	89.412	89.77	95.046	93.616	89.17	130.669	118.598	171.08	110.601	84.572	2.328	1.925	1.923	1.914	2.329		171.08	130.669	0.673517
XIXHUI	133.694	105.727	88.518	174.011	87.017	120.574	84.104	91.166	98.827	91.811	1.885	2.202	2.178	1.88	1.905		174.011	133.694	0.67195
LUYLIB	111.295	90.221	136.468	88.999	176.745	91.616	112.206	88.254	90.127	91.617	2.396	2.368	2.33	2.329	2.319		176.745	136.468	0.671283
XIXHIW	98.916	85.992	172.235	87.533	131.966	103.638	86.448	84.804	98.254	124.35	1.905	2.134	2.143	1.915	1.916		172.235	131.966	0.67115
EDUPUQ	99.382	82.697	90.596	92.408	89.951	120.539	107.493	172.201	131.964	86.575	1.779	2.036	2.039	1.755	1.753		172.201	131.964	0.670617
DEZZUD02	97.377	95.946	114.636	126.123	86.637	166.341	91.366	119.189	85.798	84.256	2.546	2.174	2.247	2.256	2.527		166.341	126.123	0.6703
CELGAE	170.567	90.952	87.781	117.29	112.149	87.555	86.12	94.259	130.504	94.931	2.243	1.79	1.791	1.802	1.793		170.567	130.504	0.667717
GOXQEP	93.98	96.393	108.89	129.565	87.289	169.623	89.068	121.545	87.296	87.544	2.488	1.789	1.979	1.825	2.474		169.623	129.565	0.667633
SUQMAS	93.636	87.983	171.395	87.079	131.367	120.236	94.9	89.2	88.659	108.397	2.244	1.782	1.797	1.774	1.794		171.395	131.367	0.667133
TOZFAP	89.275	87.743	172.411	93.784	122.204	132.448	89.275	93.784	87.743	105.348	2.376	1.969	1.969	2.394	2.328		172.411	132.448	0.66605
PEHDUB	87.403	88.689	133.889	111.184	94.475	173.843	91.914	114.925	87.369	91.486	2.258	1.787	1.805	1.786	1.768		173.843	133.889	0.6659
QEGMAS	122.759	90.81	121.707	96.397	162.668	81.379	115.51	92.59	96.242	82.495	2.457	2.014	2.002	2.233	2.224		162.668	122.759	0.66515
YIKSUH	88.186	88.017	170.096	94.802	115.018	130.224	87.788	95.101	87.682	114.756	2.643	2.246	2.255	2.227	2.644		170.096	130.224	0.664533
SOZLAU	114.266	94.14	115.562	89.882	169.954	86.481	130.151	95.446	88.686	86.85	2.614	1.707	1.691	2.214	2.212		169.954	130.151	0.663383
LIRYUI	89.739	90.634	89.492	91.493	92.575	113.398	136.285	176.087	110.316	86.932	2.076	2.03	2.066	2.019	2.443		176.087	136.285	0.663367
SONTUM	83.203	94.853	167.339	91.401	112.18	120.257	85.273	91.469	95.472	127.545	2.171	1.916	1.897	2.127	2.151		167.339	127.545	0.663233
IKOWAH	176.834	94.966	95.021	92.436	127.915	81.967	86.751	95.139	137.128	87.397	2.432	2.314	2.248	2.232	2.341		176.834	137.128	0.661767
CUCDIM	91.746	87.775	177.264	91.708	118.45	137.627	88.214	90.957	90.41	103.923	2.406	2.003	1.998	2.144	2.375		177.264	137.627	0.660617
LAPTEB10	75.666	78.71	75.664	90.208	102.395	122.093	126.243	165.86	95.143	114.307	2.229	2.665	2.501	2.253	2.239		165.86	126.243	0.660283
ETBPNI	87.2	86.79	94.785	98.146	85.846	113.435	127.414	167.01	119.147	85.935	2.344	2.205	2.192	2.213	2.35		167.01	127.414	0.659933
PHPCOB	98.084	136.319	91.269	175.879	90.884	125.562	89.137	89.825	91.068	86.775	2.543	2.175	2.2	2.229	2.333		175.879	136.319	0.659333
GAYXIN	94.239	82.196	92.962	94.239	82.196	117.545	124.91	164.393	117.545	92.962	2.711	2.246	2.711	2.246	2.145		164.393	124.91	0.65805
TOZFAP03	87.553	89.544	172.397	93.766	104.756	133.005	87.553	93.766	89.544	122.239	2.323	1.958	1.958	2.402	2.371		172.397	133.005	0.656533
OWEBEZ	169.71	88.425	90.714	130.345	115.275	101.861	84.824	90.616	114.38	85.265	2.027	1.745	1.757	1.77	1.796		169.71	130.345	0.656083
POBDOA	83.552	96.169	166.499	88.036	113.853	118.747	89.974	86.486	97.332	127.17	2.11	2.349	2.348	2.082	2.062		166.499	127.17	0.655483
EBAFOF	94.132	102.208	120.365	115.644	86.396	163.272	86	123.947	82.69	87.441	2.478	2.22	2.229	2.218	2.449		163.272	123.947	0.655417
XEGPOO	168.998	81.896	91.023	111.228	129.68	88.191	97.914	89.549	118.379	93.152	2.398	2.255	1.853	1.855	2.345		168.998	129.68	0.6553
KIHMET	115.793	87.357	87.3	87.357	87.3	96.149	96.149	128.413	167.702	115.793	1.848	2.179	1.879	2.179	1.879		167.702	128.413	0.654817
XETDAB	172.108	81.554	89.425	132.906	114.276	91.019	95.804	86.291	111.367	94.403	2.46	2.382	2.075	2.059	2.418		172.108	132.906	0.653367
KOMYIU	123.689	102.491	87.083	102.491	87.083	81.426	81.426	112.622	162.851	123.689	3.167	2.4	2.472	2.4	2.472		162.851	123.689	0.6527
WIDHID	87.726	94.527	88.579	87.726	94.527	114.1	131.8	170.945	114.1	88.579	2.237	2.131	2.237	2.131	2.217		170.945	131.8	0.652417
WECSUV	89.065	85.711	96.72	89.065	85.711	132.31	95.381	171.422	132.31	96.72	2.031	2.207	2.031	2.207	2.077		171.422	132.31	0.651867
TOZFAP02	90.829	86.496	172.449	92.972	123.407	133.342	89.025	94.409	88.115	103.248	2.364	1.968	1.958	2.397	2.323		172.449	133.342	0.651783
ZIMYUP	133.216	85.555	87.523	90.561	95.678	92.257	90.047	118.534	172.313	108.198	1.986	2.023	1.934	2.075	1.959		172.313	133.216	0.651617
LOJBET	120.336	95.581	115.528	92.883	163.097	81.633	124.135	95.825	93.409	81.849	2.412	1.784	1.781	2.417	2.411		163.097	124.135	0.649367
YACQUP	90.752	94.636	172.795	91.658	111.618	114.171	82.67	90.796	90.755	133.887	2.112	2.083	2.135	1.991	1.983		172.795	133.887	0.648467
AQIQAS	94.884	113.432	137.976	90.208	94.762	88.335	89.171	83.541	108.478	176.879	2.188	1.927	1.927	2.212	2.127		176.879	137.976	0.648383
LOJBUJ	113.148	95.789	118.502	94.481	167.101	84.349	128.279	94.126	88.021	84.177	2.73	1.787	1.779	2.458	2.458		167.101	128.279	0.647033
ODOHUK	89.127	88.572	174.989	92.529	101.635	136.233	88.809	92.435	89.761	122.13	1.764	2.258	2.258	1.765	1.767		174.989	136.233	0.645933
VIDBUG	89.42	92.782	175.714	86.604	118.25	104.723	93.399	89.133	89.626	137.022	1.86	2.012	2.028	1.895	1.851		175.714	137.022	0.644867
TOZFAP01	90.491	86.738	172.128	93.429	122.939	133.453	89.2	94.288	87.767	103.606	2.368	1.962	1.958	2.402	2.324		172.128	133.453	0.644583
YEWCOV	114.709	94.004	129.401	93.664	168.07	84.12	115.89	91.508	91	83.965	2.407	2.185	2.175	2.195	2.205		168.07	129.401	0.644483
KICNCU	88.639	91.75	175.903	89.622	114.615	108.037	89.083	89.747	92.193	137.346	1.98	2.103	2.093	1.982	2.085		175.903	137.346	0.642617
LOJBIX	116.614	95.039	118.811	95.01	163.123	81.949	124.575	93.958	93.119	81.258	2.573	1.78	1.78	2.448	2.444		163.123	124.575	0.642467
XETCUU	109.894	115.763	96.012	171.404	81.51	132.874	92.778	92.473	93.524	85.6	2.128	2.056	2.154	2.438	2.153		171.404	132.874	0.642167
REQBOH	90.201	92.498	178.136	94.115	103.386	139.77	90.167	84.089	88.4	116.814	2.437	1.997	1.985	2.668	2.456		178.136	139.77	0.639433
NOQPEO	92.212	96.295	119.132	130.558	84.728	168.893	92.989	110.303	89.104	85.631	1.922	2.121	2.13	2.179	1.908		168.893	130.558	0.638917
KEYLAB	87.535	91.185	93.772	126.064	90.786	178.458	91.425	140.129	89.516	89.648	2.385	2.037	1.757	2.438	2.392		178.458	140.129	0.638817
FANLEM	85.496	83.176	130.353	105.603	82.963	168.632	84.083	124.007	102.589	104.297	2.279	2.249	2.225	2.216	2.252		168.632	130.353	0.637983
IWIJON	125.497	81.916	81.833	94.124	94.027	94.235	95.997	123.653	163.718	110.842	2.19	2.221	2.264	2.209	2.261		163.718	125.497	0.637017
LOJBAP	118.941	95.966	115.545	92.052	163.717	81.835	125.511	95.45	93.457	82.491	2.545	1.781	1.776	2.422	2.422		163.717	125.511	0.636767
IHONUP	91.756	97.276	107.07	125.901	82.417	165.168	94.749	126.988	93.814	82.752	2.461	2.007	2.003	2.435	2.47		165.168	126.988	0.636333
BALXAN	87.266	88.821	93.928	97.1	89.97	130.13	114.43	168.297	115.436	84.621	1.746	2.148	2.153	2.147	1.752		168.297	130.13	0.636117
MAVTUZ	80.447	128.08	93.504	96.878	115.96	93.504	166.245	115.96	80.447	96.878	2.47	1.968	2.47	1.94	1.968		166.245	128.08	0.636083
QUPBOS	128.987	117.074	90.022	167.025	90.108	112.516	90.19	84.095	102.866	84.607	2.022	2.195	2.213	2.439	2.034		167.025	128.987	0.633967
LOJBIX01	95.267	94.261	162.995	81.972	116.492	118.525	92.956	81.116	94.844	124.98	1.784	2.444	2.438	2.568	1.784		162.995	124.98	0.633583
QEGLOG	83.035	165.821	94.047	115.371	90.483	84.964	127.815	101.581	87.362	116.229	2.414	2.134	1.786	1.798	2.443		165.821	127.815	0.633433
YATXEY01	89.083	119.625	85.83	87.913	110.539	95.926	167.807	129.823	96.222	86.851	2.614	2.272	2.345	2.275	2.479		167.807	129.823	0.633067
GAYXIN01	92.365	94.285	82.525	82.528	93.706	126.988	119.565	164.884	113.448	93.044	2.721	2.232	2.143	2.234	2.718		164.884	126.988	0.6316
FOFSUO	83.764	135.651	110.352	96.305	92.062	83.772	89.904	95.848	112.008	173.491	2.347	1.793	1.81	1.826	1.792		173.491	135.651	0.630667
YATXEY	129.84	86.501	88.167	96.14	96.144	89.064	85.83	110.704	167.669	119.447	2.278	2.292	2.359	2.498	2.628		167.669	129.84	0.630483
ZUWGAB	166.927	96.037	88.601	129.102	116.755	95.194	93.327	73.689	112.229	95.242	1.807	2.076	1.795	1.769	1.816		166.927	129.102	0.630417
HANPUJ	109.016	90.643	119.364	116.132	82.195	160.305	88.167	122.542	82.971	86.026	2.376	2.116	2.15	2.135	2.19		160.305	122.542	0.629383
FOVCOI	95.88	97.724	116.219	127.839	88.472	165.563	85.524	115.938	84.153	89.917	1.918	2.163	2.205	2.203	1.887		165.563	127.839	0.628733
TUGCOO	91.511	175.969	89.923	110.841	87.984	89.923	138.319	87.984	91.511	110.841	1.944	1.966	1.944	2.047	1.966		175.969	138.319	0.6275
QEGMUM	128.71	104.641	84.787	166.335	93.227	126.636	88.952	84.703	97.864	90.823	2.199	2.451	2.361	2.377	2.17		166.335	128.71	0.627083
LOJBIX02	93.52	94.847	163.783	82.286	126.207	118.489	94.825	81.58	93.354	115.303	1.789	2.447	2.442	2.541	1.792		163.783	126.207	0.626267
TACBII	86.871	112.715	130.67	88.128	92.012	99.745	87.882	87.286	116.518	168.158	2.242	1.761	1.778	1.776	2.257		168.158	130.67	0.6248
FOLYAH	129.469	88.984	90.654	91.903	177.283	89.065	139.844	89.393	90.293	90.286	1.938	2.168	2.058	2.009	2.011		177.283	139.844	0.623983
MEIMMN	86.885	110.453	130.704	86.066	95.955	95.982	88.789	88.301	118.837	168.043	2.525	2.196	2.194	2.248	2.392		168.043	130.704	0.622317
XENLIN	90.779	91.773	122.945	96.864	88.115	177.448	90.787	140.166	87.812	89.936	1.89	2.054	2.119	2.03	1.887		177.448	140.166	0.621367
CIYGOH	87.628	95.61	167.305	87.261	116.184	113.725	84.817	89.821	96.765	130.036	1.762	1.773	1.74	1.826	1.752		167.305	130.036	0.62115
JUGWEP	91.088	130.472	121.806	93.054	87.134	88.173	99.155	83.385	107.131	167.736	2.359	1.786	1.802	1.755	1.806		167.736	130.472	0.621067
CPEPNI	87.434	86.995	133.518	112.945	95.653	170.745	89.827	113.537	88.656	93.345	1.869	2.189	2.205	2.29	1.893		170.745	133.518	0.62045
YIKSUH	88.108	87.693	95.322	94.716	87.139	132.607	117.027	169.804	110.366	88.93	2.61	2.262	2.225	2.25	2.629		169.804	132.607	0.61995
CIHTUI	88.598	93.901	88.071	87.864	95.427	114.382	133.469	170.654	112.148	88.098	1.902	2.346	1.908	2.345	2.296		170.654	133.469	0.61975
CIHTUI10	112.147	87.855	133.468	88.594	170.653	95.434	114.384	88.08	88.101	93.893	2.296	1.908	1.902	2.346	2.345		170.653	133.468	0.61975
FILKIW	85.932	115.996	87.451	91.487	110.818	98.279	170.28	133.184	91.018	87.868	2.216	2.173	2.226	2.142	2.109		170.28	133.184	0.618267
CUCDIM	91.57	87.347	175.611	92.603	117.228	138.521	88.365	91.666	89.795	104.251	2.421	2.015	2.004	2.147	2.364		175.611	138.521	0.618167
PINGIC	97.681	170.029	84.854	104.82	93.047	87.094	133.007	91.84	85.496	121.888	2.126	1.847	1.813	1.814	1.819		170.029	133.007	0.617033
ONOREP	83.446	80.9	125.643	107.108	96.004	164.187	96.347	127.248	94.576	91.675	2.371	2.301	1.878	1.892	2.354		164.187	127.248	0.61565
EVUHEJ	167.682	81.488	90.229	111.895	116.674	87.9	92.011	91.362	130.809	99.02	2.097	2.247	1.872	1.862	2.053		167.682	130.809	0.61455
KADTEP	114.213	89.031	88.483	92.839	88.028	95.668	86.847	140.236	177.023	105.539	2.136	2.044	2.04	2.038	2.022		177.023	140.236	0.613117
COXRIQ	132.115	112.274	90.863	168.766	94.761	115.593	86.119	89.944	95.298	85.033	2.18	1.794	1.793	1.784	1.797		168.766	132.115	0.61085
DIZNUX	96.639	95.428	115.57	128.464	91.014	165.039	84.983	115.9	81.845	91.641	1.883	2.122	2.158	2.223	1.905		165.039	128.464	0.609583
HAHVAQ	87.323	92.869	176.942	89.59	140.377	99.179	90.033	90.425	89.067	120.422	2.115	2.008	2.012	1.987	2.025		176.942	140.377	0.609417
LERNIH	116.932	115.339	100.591	163.407	83.801	126.852	88.62	95.881	90.904	82.108	2.129	2.036	2.161	2.402	2.121		163.407	126.852	0.60925
NAVJEZ	87.002	90.18	108.173	118.908	90.157	169.157	95.235	132.641	95.592	84.093	2.301	1.794	1.758	1.802	1.792		169.157	132.641	0.6086
XEWMUI	99.229	88.608	98.55	132.46	84.534	168.904	85.403	128.907	101.284	84.428	2.434	1.939	1.957	2.422	2.43		168.904	132.46	0.6074
QUGCUQ	115.999	109.401	91.141	170.893	91.329	134.6	84.732	93.631	94.398	86.204	2.358	2.067	1.893	1.88	2.308		170.893	134.6	0.604883
GAKBEC	89.188	85.479	132.032	113.177	99.435	168.307	89.962	114.78	85.921	92.247	1.778	1.782	1.793	1.821	1.997		168.307	132.032	0.604583
ULUREZ	117.324	86.269	129.692	86.702	165.945	97.06	112.983	87.709	87.395	96.987	2.249	1.752	1.747	2.203	2.2		165.945	129.692	0.604217
OBANIQ	87.206	91.134	174.838	92.007	112.424	138.677	90.155	93.045	87.919	108.896	2.128	1.812	1.814	1.808	2.142		174.838	138.677	0.602683
NIBMES	88.535	143.654	91.536	89.887	108.173	91.536	179.774	108.173	88.535	89.887	2.222	1.827	2.222	2.023	1.827		179.774	143.654	0.602
XIXFAL	101.167	87.098	82.723	84.907	85.575	121.329	115.695	159.088	122.973	99.375	1.71	1.867	1.857	1.878	1.867		159.088	122.973	0.601917
WEYLIX	83.872	118.845	82.616	91.643	111.781	95.678	165.44	129.357	95.573	92.735	2.188	2.008	2.185	2.195	2.202		165.44	129.357	0.601383
TACBII01	92.185	167.897	88.352	131.85	86.223	99.865	115.886	88.184	87.404	112.231	2.254	1.767	1.782	1.767	2.242		167.897	131.85	0.600783
JASJUI	87.659	174.319	90.321	110.829	92.841	90.321	138.342	92.841	87.659	110.829	1.865	2.236	1.865	2.092	2.236		174.319	138.342	0.599617
IFOBEL	86.942	90.477	171.172	92.353	135.274	111.706	84.959	94.039	89.259	112.96	2.57	2.501	2.49	2.213	2.218		171.172	135.274	0.5983
LEGQOE	168.702	83.931	91.779	111.384	132.893	92.368	99.471	82.623	113.972	92.233	2.307	2.156	1.716	2.302	2.284		168.702	132.893	0.596817
BAQZAU	85.15	134.197	114.02	93.276	90.363	87.403	96.656	89.408	111.717	169.949	2.266	1.797	1.81	1.776	1.78		169.949	134.197	0.595867
KUQDOQ	88.372	89.491	109.771	107.972	91.299	177.841	90.198	142.245	90.235	90.579	2.252	1.876	1.91	1.879	2.254		177.841	142.245	0.593267
OPOSIX	114.927	110.096	85.144	170.544	91.445	134.954	90.41	85.401	91.97	93.41	2.243	2.44	2.382	2.361	2.251		170.544	134.954	0.593167
SEZTUN	110.411	88.674	139.101	89.41	174.514	90.352	110.411	89.41	88.674	95.135	2.506	2.043	2.043	2	2.321		174.514	139.101	0.590217
TIQTAQ	86.971	95.522	93.415	131.965	103.904	167.313	83.497	131.62	83.937	83.355	2.346	2.24	2.287	2.207	2.25		167.313	131.965	0.589133
OBANIQ	87.113	91.929	173.259	93.804	110.049	137.98	89.623	92.886	86.549	111.955	2.133	1.816	1.819	1.803	2.133		173.259	137.98	0.587983
YEXREA	110.631	88.338	105.741	89.853	178.725	90.72	143.623	90.465	90.896	89.29	2.234	1.785	1.791	1.83	1.828		178.725	143.623	0.585033
FANLEM	81.519	83.339	128.336	101.751	86.559	164.626	79.443	129.569	108.272	105.197	2.262	2.235	2.237	2.222	2.258		164.626	129.569	0.584283
XUZCEC	88.682	171.796	88.012	104.716	97.661	83.358	136.741	87.841	96.415	118.24	2.285	2.004	2.239	2.238	2.23		171.796	136.741	0.58425
TOMKAH	79.387	78.977	121.404	119.69	90.465	156.455	102.04	118.788	97.089	91.863	1.948	2.24	2.093	2.069	1.961		156.455	121.404	0.584183
SAQBER	82.621	83.036	168.77	99.93	111.424	133.768	94.147	91.227	91.625	112.6	2.257	2.066	1.764	2.223	2.265		168.77	133.768	0.583367
TMPBNI	86.339	86.208	167.29	96.314	132.316	117.571	87.704	96.275	86.616	110.105	2.578	2.205	2.208	2.204	2.427		167.29	132.316	0.5829
LEJNOG	95.374	86.731	168.95	83.007	134.037	114.13	95.325	95.648	86.383	111.321	1.788	2.205	1.793	1.8	1.785		168.95	134.037	0.581883
SITKUB	111.186	86.324	111.318	93.807	172.317	92.692	137.481	86.365	91.05	87.75	2.418	1.8	1.961	2.338	2.334		172.317	137.481	0.5806
ZOFXEX	113.784	96.817	117.695	81.179	163.171	94.92	128.396	94.815	82.657	91.457	2.234	1.787	2.202	2.297	2.276		163.171	128.396	0.579583
TMPBNI	87.076	86.493	169.286	95.517	134.56	113.18	87.192	95.03	87.454	112.252	2.553	2.213	2.205	2.194	2.453		169.286	134.56	0.578767
VUJXOP	85.434	88.431	134.139	106.821	96.014	168.825	87.951	118.949	89.642	95.128	2.007	2.245	2.21	1.969	2.024		168.825	134.139	0.5781
NMPMNC	117.242	97.252	113.544	95.884	163.851	82.35	129.174	94.41	89.668	82.394	2.358	1.645	1.657	2.296	2.285		163.851	129.174	0.57795
SIJGUQ	87.633	92.94	90.724	92.077	85.07	142.364	112.354	176.913	105.27	92.5	1.984	2.248	2.119	2.209	1.991		176.913	142.364	0.575817
RIWNER01	86.526	91.209	91.25	91.209	91.25	110.731	110.731	173.051	138.538	86.526	2.259	2.227	2.114	2.227	2.114		173.051	138.538	0.575217
POHYOA	109.584	105.601	90.569	179.289	89.816	144.804	90.78	90.064	89.701	89.314	2.468	1.767	2.41	2.384	2.461		179.289	144.804	0.57475
RIWNER	91.711	90.771	173.003	85.156	110.791	138.575	91.701	87.926	90.71	110.62	2.128	2.202	2.251	2.259	2.101		173.003	138.575	0.5738
AYALAP	81.376	92.687	162.309	93.269	113.056	118.926	80.99	96.458	97.056	128.018	2.461	2.136	2.178	1.772	1.741		162.309	128.018	0.571517
NOCGIV	92.408	112.063	98.341	89.133	135.184	88.434	169.223	112.579	88.247	86.008	2.218	1.788	1.786	1.793	1.781		169.223	135.184	0.567317
PAPTIL	137.801	81.996	94.633	173.858	90.188	139.858	84.59	90.653	87.458	93.595	2.384	2.307	2.317	2.338	2.381		173.858	139.858	0.566667
CNCOPP10	85.219	91.068	168.238	97.562	117.284	108.403	84.262	93.547	87.278	134.312	2.289	2.257	2.254	1.705	2.264		168.238	134.312	0.565433
VULBOV	100.703	91.726	111.242	133.64	89.742	167.544	84.587	115.098	90.181	85.753	1.989	1.81	1.794	1.763	1.778		167.544	133.64	0.565067
YEMXOF	80.39	96.24	162.4	94.504	128.529	115.229	82.01	93.294	91.194	116.225	3.19	2.519	2.557	2.341	2.338		162.4	128.529	0.564517
LATJUL	92.207	85.326	90.202	87.369	85.843	119.509	108.457	165.711	131.936	101.921	2.301	1.774	1.771	1.795	1.773		165.711	131.936	0.562917
ANAZAR	88.74	84.909	85.163	135.624	95.725	172.917	86.705	139.144	89.632	91.128	2.296	1.612	1.553	2.04	2.282		172.917	139.144	0.562883
CASWUO10	92.435	93.937	85.461	93.263	83.89	140.82	144.018	177.709	75.082	89.715	1.739	2.368	2.115	2.378	2.157		177.709	144.018	0.561517
ROYGUJ	87.238	75.365	95.994	87.964	142.317	95.994	175.928	142.317	87.238	87.964	2.282	1.988	2.282	2.246	1.988		175.928	142.317	0.560183
FIYDIB	93.012	92.587	90.001	85.236	84.309	133.341	90.494	169.393	135.786	96.494	2.551	2.455	2.365	2.471	2.227		169.393	135.786	0.560117
JURBIH	95.937	112.013	113.048	87.415	87.865	89.607	86.392	95.472	134.935	168.437	2.306	2.021	2.305	2.339	2.294		168.437	134.935	0.558367
REDRIB	88.667	89.064	111.99	106.868	90.68	174.597	92.338	141.099	93.058	88.011	2.432	2.168	2.342	2.382	2.415		174.597	141.099	0.5583
GOPROU	80.387	94.837	96.436	96.235	96.261	122.931	125.173	158.67	111.893	78.29	2.339	1.764	1.775	1.76	1.775		158.67	125.173	0.558283
ETURUG	87.507	89.451	115.22	107.23	89.53	170.906	93.811	137.45	95.238	86.93	2.487	2.02	1.956	1.988	1.975		170.906	137.45	0.5576
FUFCOY	95.234	102.805	96.065	80.921	128.598	96.065	161.842	128.598	95.234	80.921	2.433	2.359	2.433	2.181	2.359		161.842	128.598	0.554067
ATEWUR01	91.704	95.144	103.802	124.786	82.017	164.566	94.025	131.335	97.734	83.073	2.369	1.895	1.874	2.326	2.355		164.566	131.335	0.55385
AYALAP	82.416	96.596	162.267	96.928	110.772	120.174	79.925	92.916	93.66	129.049	2.461	2.151	2.155	1.753	1.76		162.267	129.049	0.553633
YUVKOQ	91.448	91.99	167.183	82.733	118.507	133.998	94.454	84.645	92.072	107.489	2.249	2.362	2.368	2.294	2.261		167.183	133.998	0.553083
NIZDOP	114.64	92.326	108.67	93.505	169.821	84.676	136.686	92.767	93.205	85.19	2.278	2.285	2.259	2.256	2.251		169.821	136.686	0.55225
REQBOH	90.382	92.876	174.23	91.26	105.672	141.14	91.215	83.016	89.356	113.159	2.429	1.99	1.986	2.724	2.427		174.23	141.14	0.5515
VEWDAC10	130.632	85.984	90.811	92.848	171.51	92.872	138.434	87.987	93.21	86.523	2.427	1.802	2.029	2.373	2.395		171.51	138.434	0.551267
YIQQEU	125.743	118.173	79.172	158.788	95.88	116.083	96.892	79.616	94.031	95.509	2.632	2.423	2.399	2.398	2.602		158.788	125.743	0.55075
PIYFEK	104.61	89.805	154.377	74.199	121.35	112.924	94.717	112.308	66.932	112.412	2.222	2.271	2.69	2.263	2.689		154.377	121.35	0.55045
XEFJUN	128.408	80.539	128.082	95.973	161.417	95.809	103.509	80.879	95.592	95.571	2.201	2.189	2.202	2.259	2.261		161.417	128.408	0.55015
YERWAT	95.119	97.102	119.119	119.119	97.102	154.729	81.168	121.734	73.56	95.119	2.249	1.661	1.588	1.661	2.258		154.729	121.734	0.549917
KEKQEZ	135.498	117.393	97.098	168.45	91.194	107.108	84.059	93.639	87.648	85.305	2.426	1.706	2.252	2.256	2.411		168.45	135.498	0.5492
XEBWEH	168.312	94.043	87.612	135.385	110.612	97.634	88.12	88.555	113.995	86.855	2.374	1.899	1.912	1.901	2.396		168.312	135.385	0.548783
CNCOPP11	135.206	117.226	93.484	168.109	87.214	107.567	85.219	97.801	90.963	84.137	2.29	1.721	2.258	2.254	2.266		168.109	135.206	0.548383
VILYIY	91.98	177.124	88.903	107.866	88.562	88.903	144.269	88.562	91.98	107.866	2.466	1.968	2.466	2.239	1.968		177.124	144.269	0.547583
FUFCOY	94.981	102.923	96.589	80.691	128.538	96.589	161.382	128.538	94.981	80.691	2.437	2.356	2.437	2.176	2.356		161.382	128.538	0.5474
UTOKOF	166.448	91.942	92.001	112.945	133.751	82.841	101.551	91.942	112.945	82.841	2.004	1.86	1.835	1.8	1.8		166.448	133.751	0.54495
LUJMAE	92.643	139.024	111.307	95.968	87.865	88.34	92.238	85.422	109.581	171.718	2.256	1.779	1.8	1.775	1.792		171.718	139.024	0.5449
WEQJIL	113.802	104.069	94.982	174.719	89.948	142.106	88.877	90.283	89.174	88.618	2.477	2.181	1.979	1.987	2.493		174.719	142.106	0.54355
YEHPOR	86.013	87.655	96.043	86.692	96.342	128.91	142.626	175.229	88.454	89.442	2.418	2.39	2.288	2.401	2.267		175.229	142.626	0.543383
HIVFEY	96.239	87.75	85.645	85.667	87.363	134.65	110.95	167.251	114.396	95.572	2.178	2.21	2.447	2.209	2.293		167.251	134.65	0.54335
JIKVIL	81.681	102.947	102.874	128.504	87.995	161.025	91.872	122.863	104.761	74.327	2.452	2.411	2.376	2.55	2.447		161.025	128.504	0.542017
QUGCOK	109.371	113.302	92.512	169.714	84.058	137.313	92.494	95.383	86.771	91.098	2.295	2.09	1.874	1.904	2.353		169.714	137.313	0.540017
YUVLIL	94.624	135.099	90.158	83.733	112.451	90.158	167.465	112.451	94.624	83.733	2.499	2.237	2.499	2.309	2.237		167.465	135.099	0.539433
QOPXAU	112.684	97.577	95.997	85.033	86.247	88.467	89.611	113.653	165.958	133.657	2.291	2.018	2.331	2.335	2.327		165.958	133.657	0.53835
GARVAY	82.658	92.151	166.119	93.613	133.86	120.026	83.501	91.224	93.848	106.046	2.944	2.372	2.345	2.227	2.216		166.119	133.86	0.53765
PULBAZ	84.612	85.784	117.288	114.068	86.779	160.574	94.794	128.335	104.616	86.003	2.564	2.407	2.395	2.416	2.583		160.574	128.335	0.537317
VUJZAD	78.925	78.829	124.599	109.833	98.122	157.754	98.168	125.568	94.468	94.718	1.986	2.229	2.173	2.176	1.99		157.754	125.568	0.536433
CAPQUI	177.462	83.905	85.346	145.34	100.175	97.391	92.136	88.665	113.025	93.243	1.99	1.956	2.056	1.978	2.156		177.462	145.34	0.535367
AGUZEI	80.461	79.801	127.189	113.663	94.747	159.297	90.894	119.148	96.068	100.273	2.482	2.279	2.051	2.04	2.46		159.297	127.189	0.535133
TOMKAH	77.378	77.971	120.064	123.045	94.186	155.023	95.315	116.773	100.433	93.303	1.947	2.249	2.09	2.067	1.945		155.023	123.045	0.532967
JUQZUQ	113.309	97.074	95.791	88.37	87.48	87.884	86.478	111.521	167.12	135.163	2.296	2.044	2.319	2.291	2.306		167.12	135.163	0.532617
ONEPUU	78.597	79.805	166.901	107.091	103.717	135.057	93.19	85.651	99.563	113.326	1.799	1.44	1.808	1.82	1.777		166.901	135.057	0.530733
BIPJAN	79.11	97.468	93.452	94.064	99.23	122.615	125.969	157.73	111.397	79.507	2.317	1.761	1.76	1.765	1.783		157.73	125.969	0.52935
EDCRCN	94.398	91.304	85.586	89.488	89.269	107.342	111.482	172.83	141.175	92.251	1.992	1.85	1.902	1.827	1.913		172.83	141.175	0.527583
AGUZIM	79.955	80.674	118.288	113.639	90.93	159.579	95.005	128.073	99.82	95.931	2.438	2.257	2.032	2.042	2.449		159.579	128.073	0.5251
FICRIS	88.07	111.827	87.408	88.07	111.827	96.091	167.818	136.347	96.091	87.408	2.218	1.888	2.218	1.888	2.357		167.818	136.347	0.524517
ZOFXEX	130.375	81.214	116.82	97.313	161.815	92.582	112.792	81.9	96.289	93.217	2.246	2.194	1.771	2.285	2.276		161.815	130.375	0.524
VIRLIR	131.69	87.976	111.875	98.53	163.04	85.037	116.434	87.415	98.335	85.877	2.349	1.726	1.681	2.276	2.268		163.04	131.69	0.5225
FOLFUH	136.581	82.934	89.451	91.337	100.396	89.988	89.094	114.775	167.885	108.641	2.186	1.758	2.146	2.148	2.178		167.885	136.581	0.521733
LUVZIM	115.471	86.653	79.175	86.123	98.223	100.686	92.253	132.703	163.951	109.759	1.99	1.991	2.156	1.969	2.033		163.951	132.703	0.5208
QABSUK	94.865	156.771	98.58	125.532	78.385	98.58	108.935	78.385	94.865	125.532	2.609	2.175	2.609	2.871	2.175		156.771	125.532	0.52065
GATZOR01	84.935	135.907	83.218	170.362	92.466	139.15	90.703	87.267	93.3	89.98	2.264	2.383	2.278	2.251	2.264		170.362	139.15	0.5202
QIBLIY	111.487	88.184	84.76	87.58	88.983	96.171	97.539	134.979	166.113	113.49	1.98	2.025	2.081	1.999	2.048		166.113	134.979	0.5189
MEMJAS	94.999	94.593	81.391	80.963	93.454	119.202	110.138	161.78	130.655	95.29	2.593	2.381	2.364	2.398	2.6		161.78	130.655	0.51875
FAHVEP	91.515	147.708	88.139	90.621	106.146	88.139	178.758	106.146	91.515	90.621	2.327	3.029	2.327	2.962	3.029		178.758	147.708	0.5175
VUJZEH	77.606	79.278	120.099	114.006	95.053	156.851	93.121	125.82	99.499	97.429	1.987	2.221	2.183	2.164	1.985		156.851	125.82	0.517183
DEYHIB	168.631	95.068	89.948	137.684	105.203	95.835	87.954	84.574	117.08	89.465	2.112	2.038	2.044	1.999	1.942		168.631	137.684	0.515783
WUVZAQ	85.186	113.72	132.963	89.166	98.275	97.358	88.351	84.858	113.312	163.854	2.169	2.016	1.725	2.161	2.239		163.854	132.963	0.51485
PTBICF10	112.92	91.58	110.615	86.055	167.165	88.035	136.284	100.966	87.002	89.539	1.818	1.847	1.812	1.835	1.834		167.165	136.284	0.514683
LOHZUF	142.022	93.497	105.758	92.597	172.777	87.712	112.2	92.212	90.109	85.065	2.506	1.753	1.854	2.447	2.454		172.777	142.022	0.512583
RIFSEF	89.103	95.131	169.281	88.49	110.756	110.681	87.403	87.433	95.584	138.562	2.437	1.975	1.983	2.434	2.369		169.281	138.562	0.511983
EREYUW	95.082	170.569	85.422	139.854	89.995	94.345	114.51	87.199	90.955	105.423	2.428	1.962	2.075	2.072	1.989		170.569	139.854	0.511917
SARSAG	85.578	89.898	140.8	106.76	92.826	171.444	88.695	112.383	90.241	95.61	2.095	2.127	2.14	2.188	2.118		171.444	140.8	0.510733
ZISRIC	67.574	89.568	125.908	117.317	106.306	156.51	88.193	109.217	101.866	87.147	2.613	1.611	1.848	1.801	1.809		156.51	125.908	0.510033
RIFSEF01	95.481	88.777	87.349	88.777	87.349	110.721	110.721	169.038	138.558	95.481	2.37	1.981	2.436	1.981	2.436		169.038	138.558	0.508
UBIBAK	116.369	86.2	134.077	87.125	164.54	97.183	109.494	88.686	85.989	98.16	1.759	1.824	1.823	1.835	1.83		164.54	134.077	0.507717
RIFSEF	87.397	95.509	168.801	87.219	110.851	110.537	88.816	88.664	95.689	138.612	2.442	1.968	1.996	2.433	2.373		168.801	138.612	0.50315
MEDJUA	97.954	114.651	109.798	91.376	83.733	83.914	92.305	93.842	135.496	165.637	2.431	1.828	1.85	2.445	2.444		165.637	135.496	0.50235
OMIYAM	90.001	86.27	167.336	99.484	114.147	137.359	87.923	93.025	86.809	108.461	1.78	1.81	1.79	1.802	1.779		167.336	137.359	0.499617
TOHMEI	84.768	109.941	136.95	88.472	98.661	94.253	84.696	92.715	112.39	166.922	2.442	1.888	1.871	2.354	2.339		166.922	136.95	0.499533
GATZOR	92.573	93.41	139.626	84.454	82.351	169.565	89.929	135.907	91.041	87.404	2.277	2.257	2.261	2.374	2.288		169.565	139.626	0.498983
ARUSUD	88.746	90.987	89.781	88.434	91.599	147.202	110.692	177.118	102.103	89.768	2.344	1.995	2.328	1.996	2.311		177.118	147.202	0.4986
NAXXOZ	90.979	90.224	88.656	88.243	92.828	146.254	107.792	176.146	105.951	87.79	2.08	2.311	2.158	2.318	2.082		176.146	146.254	0.4982
QAWHII	93.346	92.319	164.397	82.283	112.548	134.592	92.066	82.129	94.274	112.859	2.737	2.516	2.49	2.287	2.741		164.397	134.592	0.49675
JELDUZ	133.988	81.606	82.575	95.275	95.58	92.018	95.874	116.368	163.605	109.581	2.252	1.728	2.219	2.246	2.214		163.605	133.988	0.493617
JOLJOJ	108.937	92.119	108.702	91.472	171.829	87.828	142.215	91.859	94.007	84.131	2.394	1.76	2.02	2.251	2.268		171.829	142.215	0.493567
LILPUT	90.353	91.403	82.93	89.113	94.827	91.833	142.199	171.801	125.349	94.76	2.279	2.188	1.939	2.289	2.23		171.801	142.199	0.493367
VISWEA	89.145	91.423	173.196	88.246	93.083	143.606	87.973	88.187	94.553	123.302	2.431	2.39	2.405	1.753	2.027		173.196	143.606	0.493167
WOPMEU	109.791	114.371	94.584	163.993	89.834	134.404	83.579	101.359	82.229	92.269	2.3	1.728	2.149	2.305	2.344		163.993	134.404	0.49315
MIZSOE	92.876	94.827	169.156	90.208	111.302	109.119	85.966	83.679	95.739	139.579	1.944	2.113	2.109	1.9	1.927		169.156	139.579	0.49295
WUVZIY	137.26	115.506	84.98	166.811	95.798	107.233	89.991	86.627	96.993	89.284	2.467	2.002	2.205	2.21	2.279		166.811	137.26	0.492517
WUVZIY	137.19	86.32	85.707	95.955	97.032	89.664	88.99	115.014	166.724	107.782	2.456	1.985	2.213	2.273	2.201		166.724	137.19	0.492233
HIDWIC	95.063	97.528	116.093	137.745	82.6	167.191	86.717	106.116	89.848	91.667	1.982	1.78	1.775	1.758	1.976		167.191	137.745	0.490767
VUJYOQ	96.788	108.312	97.617	77.638	125.844	97.617	155.275	125.844	96.788	77.638	1.981	2.167	1.981	2.221	2.167		155.275	125.844	0.490517
VUKJES	81.678	85.793	115.66	108.899	94.38	164.361	96.007	134.999	97.843	87.957	2.039	2.274	2.175	1.989	2.006		164.361	134.999	0.489367
IGIREW	93.119	168.268	91.281	139.096	89.332	94.369	129.136	81.441	90.984	91.578	2.12	1.942	1.94	2.177	2.01		168.268	139.096	0.4862
SESQAJ	88.696	104.88	91.129	88.696	104.88	90.341	179.318	150.24	90.341	91.129	1.95	2.009	1.95	2.009	2.231		179.318	150.24	0.484633
KUHZUI	85.083	86.568	133.294	112.674	98.107	162.368	86.482	114.02	87.995	99.474	2.204	1.749	1.761	1.74	2.211		162.368	133.294	0.484567
YUYZUO	88.194	92.473	105.243	150.295	88.675	179.289	89.113	104.448	90.95	90.919	1.851	2.164	1.832	1.838	1.87		179.289	150.295	0.483233
XUTSUB	87.97	86.395	166.224	95.935	110.597	137.238	87.519	97.822	88.101	112.165	2.264	1.799	1.795	1.797	1.762		166.224	137.238	0.4831
MUDFEW	93.442	108.493	107.165	88	85.728	88.809	93.845	92.497	144.005	172.963	2.082	2.09	1.985	2.113	2.006		172.963	144.005	0.482633
GOPROU	128.72	96.603	94.26	99.147	95.926	79.516	78.427	108.273	157.63	123.006	2.363	1.77	1.769	1.766	1.767		157.63	128.72	0.481833
ZEGTIQ	84.624	135.795	110.993	97.658	89.124	86.197	97.595	88.622	113.058	164.683	1.816	1.803	1.802	1.83	1.805		164.683	135.795	0.481467
BIPYAC	83.559	80.805	88.545	105.211	89.311	136.292	111.152	165.163	108.968	96.286	2.277	2.243	1.777	1.804	2.296		165.163	136.292	0.481183
UBAPOE	167.476	88.476	95.887	111.077	138.64	85.886	96.554	89.316	110.233	87.553	2.318	1.779	1.785	1.789	1.789		167.476	138.64	0.4806
ODOHOE	114.834	105.338	94.275	168.543	88.904	139.77	86.234	96.077	93.088	84.973	2.115	1.779	1.775	1.788	2.295		168.543	139.77	0.47955
MEGVUS	83.322	165.218	92.287	136.648	91.473	82.571	113.691	97.358	89.349	109.38	1.788	2.133	1.822	1.818	2.385		165.218	136.648	0.476167
VUJYIK	134.056	82.462	112.208	95.339	162.618	89.912	113.611	80.922	95.626	97.987	2.349	2.197	1.93	1.957	2.4		162.618	134.056	0.476033
FEZWOW	85.623	86.407	165.01	94.327	110.576	136.458	88.488	100.663	88.409	112.966	1.772	1.998	1.773	1.8	1.786		165.01	136.458	0.475867
KUHCEX	121.155	96.084	97.668	94.685	96.037	79.207	80.023	108.392	158.924	130.451	2.109	2.362	2.266	2.34	2.276		158.924	130.451	0.47455
RULWUQ	88.427	89.38	109.92	110.784	86.916	167.616	95.314	139.28	96.893	86.808	2.366	1.912	1.91	1.917	2.346		167.616	139.28	0.472267
YIBSEH	84.962	86.852	114.041	111.074	87.276	163.102	95.303	134.776	101.532	88.037	2.39	2.276	2.23	2.275	2.406		163.102	134.776	0.4721
XULYIN	149.535	93.487	61.734	86.726	177.809	89.155	148.35	88.7	94.189	89.025	2.413	1.544	1.478	2.051	2.032		177.809	149.535	0.471233
RAWPUB	175.444	92.227	88.384	114.644	98	92.227	88.384	89.215	147.356	89.215	2.208	2.208	1.773	2.097	1.9		175.444	147.356	0.468133
ONOREP	81.989	80.957	133.956	104.819	96.174	162.023	95.74	121.128	92.014	97.472	2.359	2.324	1.872	1.882	2.359		162.023	133.956	0.467783
WOZQIL	92.308	101.871	107.565	125.32	77.077	155.177	101.159	127.111	93.914	78.119	2.396	2.371	2.361	2.429	2.371		155.177	127.111	0.467767
VOWPUU	89.894	87.22	94.049	92.744	91.903	145.156	112.1	173.178	102.741	86.962	2.507	2.03	2.231	2.029	2.484		173.178	145.156	0.467033
FERMAQ10	82.637	136.002	111.115	97.749	88.123	88.562	97.977	88.913	112.782	163.989	2.27	1.754	1.766	1.734	1.784		163.989	136.002	0.46645
FERMAQ	82.639	136.003	111.116	97.75	88.124	88.561	97.976	88.911	112.78	163.988	2.27	1.754	1.766	1.734	1.784		163.988	136.003	0.466417
NAKJAK	84.192	87.324	161.573	95.788	113.072	133.597	85.651	102.342	88.605	113.314	1.889	2.352	2.342	2.376	1.896		161.573	133.597	0.466267
MEHGOY	82.523	95.785	162.022	90.75	134.073	107.852	80.509	91.998	95.028	118.035	1.766	2.146	2.162	1.815	1.804		162.022	134.073	0.465817
XAMNAA	80.92	148.192	83.391	119.864	105.904	83.391	120.272	105.904	80.92	119.864	2.417	2.427	2.417	1.849	2.427		148.192	120.272	0.465333
EBAKIC	83.08	119.367	73.322	93.541	128.477	87.952	156.366	111.957	104.57	94.059	2.174	2.04	1.955	2.077	2.066		156.366	128.477	0.464817
ATEWUR01	96.179	95.36	106.143	136.714	84.134	164.578	92.263	117.089	94.321	81.516	2.366	1.858	1.868	2.316	2.368		164.578	136.714	0.4644
JOWLEM	147.786	86.964	66.248	85.171	175.623	92.885	145.736	88.666	93.277	90.686	2.422	1.502	1.399	2.307	2.302		175.623	147.786	0.46395
PEHBOU	95.681	91.889	104.374	144.552	89.086	172.385	89.986	111.063	88.926	87.432	2.092	2.368	1.931	1.791	2.083		172.385	144.552	0.463883
OFULOS	94.585	94.107	88.561	84.787	88.568	107.723	107.633	171.845	144.195	91.928	2.076	2.081	2.011	2.111	2.004		171.845	144.195	0.460833
NIBMAO	88.603	112.755	141.08	88.077	95.475	95.789	87.633	88.159	106.165	168.672	2.221	1.983	2.314	2.218	2.301		168.672	141.08	0.459867
FIQZIR	114.292	145.353	92.573	172.922	87.788	99.9	90.086	90.921	92.815	82.865	2.514	1.934	1.987	1.968	1.932		172.922	145.353	0.459483
YUFVOK	144.2	89.114	108.88	93.03	171.744	88.046	106.918	88.762	95.206	89.014	2.426	2.174	1.92	2.451	2.448		171.744	144.2	0.459067
YUFVOK	88.929	143.947	108.696	92.231	87.868	89.99	96.308	87.941	107.239	171.451	2.429	2.174	1.924	2.45	2.409		171.451	143.947	0.4584
OFOKEZ	113.71	82.403	133.182	86.769	160.665	98.658	113.105	84.972	91.242	99.807	2.276	1.911	1.898	2.37	2.392		160.665	133.182	0.45805
NIDDUA	91.303	86.261	168.871	96.676	113.886	141.409	84.704	94.384	90.386	104.703	1.79	1.988	1.984	1.804	1.775		168.871	141.409	0.4577
FEWTEH	178.673	90.476	90.351	151.341	106.361	90.476	90.351	89.422	102.298	89.422	2.026	2.026	2.075	2.069	2.238		178.673	151.341	0.455533
YUCPIV	78.846	78.271	129.434	105.097	99.728	156.694	101.026	125.268	90.147	97.022	2.375	2.401	2.349	2.329	2.391		156.694	129.434	0.454333
YOVXUD	111.809	110.88	97.576	164.519	87.052	137.306	90.134	97.313	83.709	88.259	1.708	2.237	2.163	2.171	2.016		164.519	137.306	0.45355
HIVFEY	95.961	86.521	86.044	86.266	87.744	140.868	107.629	167.999	111.502	95.141	2.175	2.205	2.437	2.209	2.29		167.999	140.868	0.452183
BOBMEK10	96.045	76.009	164.11	97.105	137.034	106.275	99.282	74.256	103.451	107.066	2.291	1.422	1.904	2.233	2.246		164.11	137.034	0.451267
DITPUS	82.196	83.303	101.247	134.161	96.994	161.204	83.056	124.587	88.123	101.065	2.464	1.911	1.961	1.791	2.454		161.204	134.161	0.450717
KELXAA	149.837	115.976	92.361	176.799	100.587	94.136	89.698	86.141	82.612	90.182	1.951	1.939	2.2	2.219	2.077		176.799	149.837	0.449367
KELXAA10	89.698	92.361	176.799	100.587	115.976	149.837	90.182	82.612	86.141	94.136	1.951	2.2	2.219	2.077	1.939		176.799	149.837	0.449367
LAZZUI	111.123	90.48	143.436	88.61	170.339	93.337	105.433	86.745	88.117	96.296	2.824	1.903	1.916	2.33	2.339		170.339	143.436	0.448383
UXUMAC	85.252	90.266	92.687	90.266	92.687	108.131	108.131	170.503	143.737	85.252	2.856	2.213	2.096	2.213	2.096		170.503	143.737	0.4461
YOJMUF	166.254	91.647	99.747	110.678	139.523	83.58	93.997	89.038	109.063	86.321	2.387	1.768	1.783	1.787	1.779		166.254	139.523	0.445517
HIVXOZ	71.328	82.589	110.204	127.344	94.722	153.908	94.264	122.316	95.395	98.535	2.428	1.779	1.78	1.803	2.421		153.908	127.344	0.442733
AYALOD	99.249	89.875	137.341	95.432	163.902	86.35	123.331	90.89	94.878	77.656	1.844	1.812	1.83	2.439	2.435		163.902	137.341	0.442683
ORETAH	95.64	89.308	163.151	83.678	136.614	119.865	97.361	82.92	93.455	103.389	2.025	2.149	2.122	2.117	2.01		163.151	136.614	0.442283
FABVEK	118.991	81.41	128.181	86.211	154.632	102.03	112.792	81.247	90.102	102.531	1.874	1.728	2.176	1.912	1.927		154.632	128.181	0.44085
XAZHAK	87.873	88.525	96.138	96.016	87.62	141.407	111.812	167.84	106.778	87.96	1.973	2.224	2.307	2.223	2.461		167.84	141.407	0.44055
VISWAW	145.03	93.3	92.498	171.448	87.821	121.658	90.885	93.922	86.174	87.089	2.43	2.046	2.424	2.408	1.748		171.448	145.03	0.4403
ZIDSOX	84.761	102.22	158.3	86.811	115.753	112.28	83.24	87.835	99.046	131.889	2.233	2.555	2.483	2.169	2.227		158.3	131.889	0.440183
LUVZOS	87.439	135.828	77.854	92.599	107.101	98.061	162.226	114.365	85.946	102.633	2.053	2.008	2.188	1.987	1.953		162.226	135.828	0.439967
UJISOW	106.993	100.715	90.379	178.673	89.596	152.286	88.386	90.733	90.909	90.597	2.461	2.262	2.008	2.011	2.477		178.673	152.286	0.439783
XARWUL	86.934	90.83	174.747	93.713	111.976	148.454	93.85	91.277	85.783	99.536	1.97	2.136	2.125	2.041	1.951		174.747	148.454	0.438217
KUKMIM	88.799	178.607	91.533	103.785	89.303	91.533	152.43	89.303	88.799	103.785	2.118	2.128	2.118	2.336	2.128		178.607	152.43	0.436283
NELCEM	85.573	134.126	110.24	99.537	87.214	87.779	99.87	84.249	115.62	160.235	2.381	2.121	1.654	2.374	2.376		160.235	134.126	0.43515
AYACOU	73.357	73.947	118.031	121.245	98.708	147.299	99.007	120.724	96.675	97.364	2.42	1.836	1.798	1.779	2.418		147.299	121.245	0.434233
MIFYUW	90.138	89.233	90.704	89.233	90.704	103.134	103.134	179.724	153.731	90.138	2.169	2.044	1.988	2.044	1.988		179.724	153.731	0.433217
VUJYIK	138.714	82.386	82.695	94.138	94.408	90.332	98.686	111.354	164.705	109.693	2.357	2.208	1.954	1.929	2.413		164.705	138.714	0.433183
VEZQOI	91.685	178.481	88.676	103.746	89.24	88.676	152.507	89.24	91.685	103.746	2.301	2.041	2.301	2.171	2.041		178.481	152.507	0.4329
RIQQEP	90.319	90.552	110.377	107.852	86.523	167.698	96.432	141.77	94.764	85.209	2.474	1.825	1.845	2.427	2.478		167.698	141.77	0.432133
IXAREF	93.581	107.826	150.912	91.427	91.799	90.391	85.821	88.004	101.261	176.774	2.27	1.934	1.927	2.242	2.176		176.774	150.912	0.431033
MIFYUW01	87.494	179.493	92.391	103.12	90.254	92.391	153.761	90.254	87.494	103.12	1.975	2.051	1.975	2.18	2.051		179.493	153.761	0.428867
ATEWUR	83.605	83.088	112.307	109.325	89.706	163.927	98.207	138.198	95.16	94.233	2.368	2.312	1.878	1.873	2.365		163.927	138.198	0.428817
YOMLUH	94.473	89.394	176.08	88.308	150.463	99.533	88.849	92.52	88.003	109.68	2.217	2.018	2.029	2.02	2.013		176.08	150.463	0.42695
AYALOD	99.129	88.39	137.541	96.665	162.822	79.445	123.149	91.281	95.137	83.655	1.709	1.844	1.796	2.433	2.436		162.822	137.541	0.42135
YEXREA	104.731	89.848	102.671	90.202	177.795	93.276	152.584	90.989	87.624	88.484	2.261	1.759	1.803	1.848	1.839		177.795	152.584	0.420183
ODIFOW	177.999	83.896	75.614	97.017	152.855	95.03	106.275	81.26	101.141	99.069	2.724	1.577	2.291	2.297	2.319		177.999	152.855	0.419067
VUJXUV	137.911	82.805	117.867	97.887	163.023	87.776	104.056	85.634	98.496	92.547	1.981	2.268	2.161	2	2.023		163.023	137.911	0.418533
MIFGUD	93.217	87.505	90.746	87.505	90.746	105.771	105.771	173.565	148.458	93.217	2.517	2.022	2.309	2.022	2.309		173.565	148.458	0.41845
JOWLEM	143.019	91.908	65.428	89.326	176.604	92.105	151.5	85.899	87.403	91.205	2.412	1.517	1.385	2.303	2.307		176.604	151.5	0.4184
YAFREC	102.266	102.949	88.467	179.48	89.277	154.408	85.324	91.867	91.036	94.215	2.022	2.231	1.97	1.966	1.988		179.48	154.408	0.417867
UBAQEV	98.439	87.475	165.349	88.067	140.394	111.264	96.16	86.188	88.389	108.337	1.797	2.32	2.31	1.788	1.779		165.349	140.394	0.415917
QEVHIJ	113.89	95.387	103.548	81.236	87.372	96.41	80.937	109.859	160.315	135.454	1.936	1.921	1.971	1.949	1.918		160.315	135.454	0.41435
UBAQAR	164.171	86.363	86.891	109.389	111.268	87.272	88.529	98.474	139.332	97.339	2.259	2.267	1.78	1.763	1.777		164.171	139.332	0.413983
FUPQOW	119.609	145.466	84	170.203	97.583	94.62	92.132	86.212	90.745	92.33	1.986	1.983	2.142	2.136	1.964		170.203	145.466	0.412283
KIHMIX	86.198	111.061	136.661	86.789	100.976	97.653	86.484	86.823	112.241	161.368	1.882	2.209	2.205	1.88	1.852		161.368	136.661	0.411783
YERYOK	92.696	107.323	101.103	89.455	88.769	90.063	89.855	91.096	151.545	176.208	2.018	2.202	2.007	2.032	2.012		176.208	151.545	0.41105
LACMIN	88.368	86.206	135.848	114.368	101.614	160.498	84.78	109.771	86.121	97.851	2.363	2.433	2.447	2.125	2.37		160.498	135.848	0.410833
POLBOJ	91.564	174.45	89.878	105.065	87.225	89.878	149.87	87.225	91.564	105.065	2.323	1.991	2.323	2.197	1.991		174.45	149.87	0.409667
PAZDAX	89.32	91.428	175.89	90.13	94.664	151.311	89.94	86.478	91.161	114.002	2.341	1.995	1.995	2.404	2.296		175.89	151.311	0.40965
FIYMOP	87.423	86.142	137.859	109.933	99.073	162.318	86.37	112.208	87.395	98.607	2.209	1.766	1.74	2.246	2.211		162.318	137.859	0.40765
POWCUZ	110.731	83.687	133.709	91.909	158.168	101.292	115.453	83.283	84.554	99.676	2.424	1.865	1.863	2.374	2.347		158.168	133.709	0.40765
TUDKOS	90.083	171.933	87.667	106.198	94.034	87.667	147.603	94.034	90.083	106.198	2.316	2.132	2.316	2.048	2.132		171.933	147.603	0.4055
UYOHUN	88.66	90.542	109.955	95.693	91.581	178.642	93.265	154.321	88.04	88.664	1.95	2.03	2.23	1.988	1.938		178.642	154.321	0.40535
KELQIB	101.057	104.697	114.198	129.934	84.618	154.213	84.918	115.781	85.767	83.074	2.18	2.077	2.131	2.146	2.193		154.213	129.934	0.40465
IDOBEI	90.836	153.142	89.772	88.69	103.429	89.772	177.38	103.429	90.836	88.69	1.998	2.028	1.998	2.321	2.028		177.38	153.142	0.403967
PEWXIY	107.486	107.64	95.576	169.102	87.203	144.874	88.015	95.293	88.738	89.493	1.924	1.942	2.035	2.032	1.923		169.102	144.874	0.4038
PEYTOF	89.584	89.704	90.458	90.458	89.704	95.526	109.617	178.928	154.857	89.584	2.209	1.957	1.924	1.957	1.96		178.928	154.857	0.401183
WEMWAO	94.655	125.975	96.365	163.281	91.92	139.221	83.813	97.257	87.881	85.463	1.904	2.184	2.214	2.223	1.741		163.281	139.221	0.401
XEGSOR	136.31	115.506	80.696	160.355	97.472	108.174	92.751	81.739	97.979	93.885	2.35	2.144	2.42	2.413	2.324		160.355	136.31	0.40075
EVEKOF	90.074	177.996	89.475	103.01	91.002	89.475	153.981	91.002	90.074	103.01	2.645	2.386	2.645	2.027	2.386		177.996	153.981	0.40025
BAGRAF	93.568	86.843	92.218	92.771	90.677	82.368	92.315	150.6	174.526	115.142	2.553	1.962	1.955	1.924	1.942		174.526	150.6	0.398767
UVUXOZ01	109.849	89.193	135.814	85.398	159.705	93.953	114.257	84.916	85.368	106.318	2.697	2.395	2.424	2.37	2.35		159.705	135.814	0.398183
MUXLUM	89.573	150.879	87.726	92.631	108.5	90.69	174.768	100.585	89.493	92.27	2.001	2.035	2.013	2.224	2.015		174.768	150.879	0.39815
FIWSOU	100.513	111.14	106.526	80.3	129.067	86.108	152.936	119.715	83.169	87.438	1.872	2.031	2.134	2.192	2.208		152.936	129.067	0.397817
BIPXOP	95.578	91.445	168.956	91.38	145.144	109.77	95.456	85.299	85.26	105.086	2.24	2.005	2.015	1.873	1.869		168.956	145.144	0.396867
XAVROD01	100.984	85.215	157.489	87.392	133.692	113.807	101.519	84.581	85.224	112.469	2.065	2.352	2.321	2.085	2.069		157.489	133.692	0.396617
LOHZOZ	107.223	95.647	109.026	91.672	167.521	85.87	143.743	94.811	91.34	84.543	2.381	1.831	1.74	2.459	2.456		167.521	143.743	0.3963
XAVROD	84.875	101.023	157.8	87.132	112.692	113.242	85.595	85.181	101.159	134.042	2.085	2.344	2.351	2.085	2.069		157.8	134.042	0.395967
FURWUL	150.477	87.901	97.151	87.901	97.151	87.106	87.106	59.046	174.212	150.477	1.956	1.979	2.043	1.979	2.043		174.212	150.477	0.395583
USEMEL	157.174	84.094	102.985	112.688	133.447	84.483	99.7	86.935	113.847	86.674	2.404	2.418	2.163	2.212	2.207		157.174	133.447	0.39545
HEYKIF	119.569	82.994	138.529	98.378	162.173	88.508	101.9	82.916	99.409	88.991	2.821	1.874	2.233	2.191	2.186		162.173	138.529	0.394067
YOVYEO	88.738	110.314	140.227	84.37	98.218	97.443	86.602	89.639	109.456	163.817	2.184	1.726	2.017	2.175	2.244		163.817	140.227	0.393167
REJQII	107.025	104.633	86.13	171.881	85.291	148.333	95.722	93.099	87.084	92.233	2.287	2.212	2.006	1.975	2.288		171.881	148.333	0.392467
BARDEE	174.682	88.754	95.514	104.333	151.147	89.328	89.767	85.419	104.344	93.899	2.414	1.863	2.325	2.373	2.357		174.682	151.147	0.39225
YESZOO	84.593	96.423	104.097	100.23	84.661	178.947	89.554	155.634	90.461	94.3	2.793	2.404	2.434	2.34	1.833		178.947	155.634	0.38855
PUCCIZ	92.792	90.282	172.944	86.212	149.639	101.22	94.121	90.2	89.755	109.076	2.521	2.038	2.031	2.286	2.3		172.944	149.639	0.388417
RETBOK	91.659	89.504	89.733	89.504	89.733	103.285	103.285	176.681	153.429	91.659	2.174	2.031	2.008	2.031	2.008		176.681	153.429	0.387533
UVUXOZ	109.5	88.921	136.332	85.071	159.536	94.953	114.115	85.532	85.416	105.469	2.676	2.392	2.418	2.365	2.357		159.536	136.332	0.386733
OTOJUE	92.304	87.817	175.021	87.994	151.828	103.434	92.675	90.771	90.994	104.737	2.341	2.136	2.143	1.875	1.867		175.021	151.828	0.38655
YADDUF	82.746	139.809	112.294	96.897	91.608	93.818	96.931	82.59	107.877	162.81	2.27	2.135	2.189	2.274	2.212		162.81	139.809	0.38335
YUFVOK	108.254	145.993	87.234	168.902	88.876	105.717	97.814	87.776	89.726	93.162	1.917	2.17	2.429	2.471	2.442		168.902	145.993	0.381817
PAZMPI	144.982	126.997	87.423	167.854	94.579	88.021	88.533	89.02	96.837	87.729	2.438	1.834	2.372	2.403	2.287		167.854	144.982	0.3812
NELCAI	84.475	84.627	109.718	114.662	88.02	158.377	100.672	135.614	100.571	86.791	2.389	2.129	1.654	2.373	2.377		158.377	135.614	0.379383
XEFVAF	153.099	92.584	94.227	89.895	175.606	86.582	112.623	91.699	88.81	90.042	2.467	2.061	1.85	2.401	2.388		175.606	153.099	0.375117
ILEBAC	88.499	89.712	173.537	93.538	94.152	151.058	85.964	91.807	93.52	114.774	2.437	2.371	2.365	2.082	1.711		173.537	151.058	0.37465
XITQOI	135.048	85.658	84.187	96.663	92.621	91.443	88.155	82.238	165.18	142.705	2.45	1.584	2.037	1.971	2.311		165.18	142.705	0.374583
XEFKAU	137.289	113.127	81.053	159.763	97.657	109.574	92.031	81.474	98.537	93.903	2.253	2.184	2.297	2.289	2.212		159.763	137.289	0.374567
OTOJUE	92.812	89.474	173.565	90.342	151.169	103.014	93.614	88.232	88.752	105.802	2.343	2.14	2.15	1.871	1.869		173.565	151.169	0.373267
QEGRAY	85.587	99.118	164.149	92.591	108.736	109.444	83.162	89.365	95.144	141.808	2.414	2.196	2.177	1.787	1.803		164.149	141.808	0.37235
ZITFEN	127.666	97.739	84.652	93.985	169.325	89.411	146.997	74.694	92.761	89.431	2.458	1.768	1.936	2.346	2.348		169.325	146.997	0.372133
EZIPUY	120.27	86.927	153.1	84.075	130.91	103.914	86.525	82.954	83.931	122.592	2.368	2.714	2.737	2.402	2.375		153.1	130.91	0.369833
PEGZUW	92.726	90.229	83.321	86.298	92.221	147.503	109.743	169.618	102.746	90.621	1.977	2.344	2.262	2.398	1.979		169.618	147.503	0.368583
WERBIE	120.778	91.691	79.579	169.489	91.951	147.41	92.452	90.182	90.732	90.754	2.226	2.329	2.02	2.02	2.226		169.489	147.41	0.367983
FIGRES	91.438	168.061	85.575	77.86	92.978	91.438	146.065	92.978	85.575	136.075	2.412	2.333	1.445	2.009	2.333		168.061	146.065	0.3666
VUJWUU	83.382	111.264	85.916	92.436	108.601	102.174	162.074	140.092	95.091	86.652	2.473	2.248	1.977	1.961	1.947		162.074	140.092	0.366367
AYACOU	70.546	82.902	129.559	119.212	96.326	151.483	97.214	111.229	91.662	102.717	2.431	1.816	1.784	1.779	2.422		151.483	129.559	0.3654
XERSAR	91.897	178.928	89.77	101.509	89.545	89.169	157.049	90.345	89.208	101.369	2.24	1.836	2.252	1.775	1.836		178.928	157.049	0.36465
LOHZIT	106.146	92.198	102.668	92.993	173.044	85.13	151.169	90.162	92.872	87.928	2.352	1.873	1.746	2.453	2.447		173.044	151.169	0.364583
PEGVIH	100.495	95.255	109.047	93.145	84.81	92.879	88.078	81.81	155.098	176.894	2.001	2.171	1.966	2.007	2.029		176.894	155.098	0.363267
JUQZUQ	108.766	98.844	98.176	86.056	86.555	87.069	89.065	110.028	162.897	141.202	2.294	2.047	2.304	2.303	2.326		162.897	141.202	0.361583
DITQED	82.535	88.326	104.507	140.248	98.494	161.914	83.28	115.201	83.958	99.516	2.484	1.915	1.989	1.786	2.48		161.914	140.248	0.3611
SITKUB01	88.785	92.555	172.652	93.361	137.876	151.098	87.511	91.416	87.644	70.877	1.401	2.337	2.339	1.965	2.422		172.652	151.098	0.359233
LOHZIT01	93.143	93.095	102.419	106.059	84.807	172.969	89.805	151.498	92.018	88.164	2.451	1.762	1.881	2.352	2.444		172.969	151.498	0.35785
VUJXAB	82.656	84.284	139.399	110.8	94.904	160.843	91.489	109.683	89.346	102.658	1.994	2.297	2.307	1.955	2.021		160.843	139.399	0.3574
JOWLEM01	155.177	89.383	71.884	79.489	176.603	92.842	131.988	87.556	98.156	90.554	2.428	1.508	1.45	2.31	2.312		176.603	155.177	0.3571
XITQOI	132.433	81.264	88.482	97.232	91.068	93.07	86.746	82.981	165.941	144.555	2.452	1.494	2.059	1.975	2.314		165.941	144.555	0.356433
IHOPAX	91.151	97.731	164.842	89.094	112.432	104.037	85.271	85.045	97.426	143.52	2.268	2.266	2.262	2.266	2.221		164.842	143.52	0.355367
BOYNUZ	90.9	93.429	84.911	93.429	84.911	156.89	156.89	178.2	46.219	90.9	2.363	2.038	1.675	2.038	1.675		178.2	156.89	0.355167
DUNBOD	132.716	99.345	86.429	88.534	162.074	88.457	140.784	97.592	86.708	84.345	2.42	2.027	1.786	2.414	2.418		162.074	140.784	0.354833
UNOKIS	87.178	93.958	90.846	87.178	93.958	104.457	151.086	172.085	104.457	90.846	1.976	2.087	1.976	2.087	2.003		172.085	151.086	0.349983
NASTEG	138.278	92.782	110.86	76.431	159.257	92.782	110.86	94.563	82.826	94.563	2.722	2.722	2.306	2.338	2.392		159.257	138.278	0.34965
QIJYIT	90.588	90.331	98.093	104.249	89.778	178.526	90.005	157.655	88.724	89.81	1.909	1.958	2.161	1.96	1.928		178.526	157.655	0.34785
EMAWUK	89.275	88.336	91.887	112.14	92.765	176.72	89.899	155.86	92.425	88.499	2.011	2.007	2.235	1.936	2.021		176.72	155.86	0.347667
EBZPPD10	86.741	85.915	92.771	97.972	87.189	103.411	147.804	168.653	108.668	86.107	2.555	2.303	2.294	2.356	2.936		168.653	147.804	0.347483
CMBPNI	87.829	86.718	98.098	100.705	86.101	140.403	107.621	161.196	111.976	86.681	1.847	2.18	2.321	2.178	1.872		161.196	140.403	0.34655
HIPFOD	112.433	96.021	85.624	172.216	90.311	151.479	90.621	87.256	93.558	89.19	2.298	2.325	1.98	1.984	2.392		172.216	151.479	0.345617
ELONIC	94.405	87.656	90.108	87.656	90.108	104.711	104.711	171.191	150.579	94.405	2.517	2.332	2.101	2.332	2.101		171.191	150.579	0.343533
TUSSEF	96.395	107.274	107.582	85.716	87.818	89.965	87.986	97.866	145.095	165.584	1.974	2.459	1.997	1.961	1.983		165.584	145.095	0.341483
VUJXEF	117.116	140.107	82.054	160.596	92.785	102.638	100.689	85.17	87.763	98.114	2.161	2.255	2.037	2.006	1.981		160.596	140.107	0.341483
XULYAF	157.956	90.761	44.531	85.9	178.329	87.515	157.47	90.204	95.744	91.079	2.351	1.929	1.928	2.013	2.044		178.329	157.956	0.33955
BEXPIF	89.424	89.702	172.848	95.297	101.69	152.503	88.686	91.855	88.793	105.806	2.279	1.942	1.937	2.597	2.299		172.848	152.503	0.339083
ZEGTOW	84.064	143.049	105.89	98.128	89.116	86.548	98.417	89.846	110.816	163.374	1.952	1.952	1.92	1.974	1.966		163.374	143.049	0.33875
AYALUJ	82.337	93.55	163.195	95.59	134.47	142.995	82.552	89.67	94.091	82.44	1.779	2.415	2.431	1.809	1.781		163.195	142.995	0.336667
NICZUU	86.527	94.79	170.564	89.791	76.646	132.858	86.089	93.744	94.538	150.422	2.421	2.32	2.334	2.004	1.99		170.564	150.422	0.3357
QEVYUM	142.121	114.156	80.831	162.21	101.851	98.088	78.691	103.303	91.875	88.123	1.956	2.181	2.281	2.279	2.01		162.21	142.121	0.334817
KOJQUX	156.393	87.84	62.332	89.09	176.452	92.832	141.27	89.005	88.007	90.709	2.404	1.527	1.603	2.009	2.016		176.452	156.393	0.334317
SITKUB02	88.66	92.467	172.506	93.11	138.769	152.528	88.009	91.916	87.412	68.54	1.53	2.34	2.336	1.971	2.417		172.506	152.528	0.332967
QUGDEB	110.262	91.639	96.513	92.952	92.94	85.833	84.251	100.803	168.876	148.931	2.357	2.139	1.911	1.85	2.347		168.876	148.931	0.332417
DIZNIL	99.237	100.124	111.526	139.81	90.244	159.699	84.522	108.664	82.76	89.313	1.931	1.941	2.245	2.354	1.927		159.699	139.81	0.331483
CEXMAT	85.374	86.643	144.098	101.556	96.14	163.816	89.659	114.33	88.581	99.974	1.859	2.229	2.246	2.4	1.87		163.816	144.098	0.328633
EQACEF	87.861	163.995	87.257	107.815	98.002	87.257	144.369	98.002	87.861	107.815	2.319	2.346	2.319	2.261	2.346		163.995	144.369	0.3271
KOYBEH	97.034	98.122	109.574	81.108	80.445	99.032	93.433	95.481	147.932	167.416	1.73	1.887	2.221	2.18	2.111		167.416	147.932	0.324733
OHIGOC	80.919	94.107	158.939	94.493	108.924	139.496	78.295	96.252	99.464	111.572	2.328	2.605	2.621	2.149	2.304		158.939	139.496	0.32405
HIVXIT	66.296	80.643	127.225	123.579	94.086	146.598	103.146	108.779	100.48	92.203	2.448	1.691	1.749	1.774	2.439		146.598	127.225	0.322883
PTBICF10	111.21	101.354	103.451	86.693	164.494	89.329	145.202	93.846	86.806	88.003	1.813	1.836	1.804	1.837	1.812		164.494	145.202	0.321533
AXOTIQ	91.39	88.403	92.601	159.607	91.299	178.879	88.931	107.778	89.978	89.813	2.365	2.062	1.733	2.447	2.366		178.879	159.607	0.3212
NOKVUF	88.706	90.482	157.911	100.574	93.076	177.105	90.425	101.494	89.283	89.809	2.428	1.836	1.832	2.393	2.442		177.105	157.911	0.3199
MUPJIS	100.889	87.158	91.424	88.273	91.303	93.782	90.696	156.314	175.483	102.797	2.929	2.015	2.026	2.029	2.021		175.483	156.314	0.319483
OROWAU	168.138	88.548	98.148	106.857	149.148	86.867	93.568	90.847	103.756	87.51	1.843	1.869	1.894	2.574	2.556		168.138	149.148	0.3165
GOQHAX	94.757	84.263	158.837	102.057	88.359	177.792	88.554	98.581	91.655	93.748	2.468	2.071	2.114	1.811	2.366		177.792	158.837	0.315917
FORCUL	87.597	91.026	177.949	87.597	100.487	100.487	92.029	92.029	91.026	159.027	2.023	2.035	2.035	2.023	2.229		177.949	159.027	0.315367
MAHXAW	117.04	117.02	104.935	144.852	89.773	125.94	75.108	105.862	91.08	76.083	2.42	2.256	2.326	2.361	2.275		144.852	125.94	0.3152
AXOTAI	91.323	88.471	90.895	160.007	91.618	178.917	88.306	109.019	90.635	89.455	2.366	2.043	1.764	2.447	2.375		178.917	160.007	0.315167
XUBNIR01	91.899	90.299	88.322	89.793	89.791	98.634	104.638	175.436	156.719	92.599	2.615	1.991	2.019	2.001	2.008		175.436	156.719	0.31195
SINDIC	90.004	88.901	173.655	90.235	98.548	155.098	89.892	95.883	88.523	106.309	1.993	2.196	2.222	2.168	1.996		173.655	155.098	0.309283
BEHRAI	93.133	167.082	88.629	108.922	101.609	85.631	148.677	91.225	85.839	102.308	1.948	2.005	1.995	1.952	2.012		167.082	148.677	0.30675
XUBNIR04	92.443	89.922	89.528	88.218	90.503	98.689	104.396	175.232	156.912	92.186	2.618	2.01	2.012	2.002	2.016		175.232	156.912	0.305333
BIQJIW	159.849	85.687	101.324	109.85	141.573	92.565	98.264	86.829	108.576	82.1	2.3	1.767	1.784	1.788	1.804		159.849	141.573	0.3046
RUTBUD	115.816	93.121	90.073	89.742	172.281	89.629	154.111	94.48	88.904	88.273	2.441	1.976	1.807	2.386	2.383		172.281	154.111	0.302833
KAGNOX	106.656	93.281	95.493	92.952	95.605	85.349	81.246	105.702	165.629	147.517	2.21	1.976	2.041	1.972	2.019		165.629	147.517	0.301867
NICZOO	86.53	94.697	170.373	89.161	75.302	132.278	86.522	93.917	94.907	152.342	2.424	2.324	2.334	1.994	1.973		170.373	152.342	0.300517
QUGBUR	87.096	108.597	86.817	87.096	108.597	99.584	160.832	142.807	99.584	86.817	2.23	1.761	2.23	1.761	1.78		160.832	142.807	0.300417
AVOQOR	86.841	90.102	168.419	93.182	150.396	120.129	82.732	91.745	90.779	89.475	2.509	1.991	1.996	2.031	2.021		168.419	150.396	0.300383
WEQZAW	84.671	162.532	87.574	101.616	94.917	86.195	144.568	102.388	91.301	113.814	2.087	2.159	2.114	2.056	2.206		162.532	144.568	0.2994
TPBCRU10	100.951	88.57	145.87	85.114	163.811	95.174	113.164	89.529	87.465	100.971	2.335	1.904	1.864	1.926	2.015		163.811	145.87	0.299017
WEJYOB	102.717	156.838	89.116	174.72	90.78	100.409	92.428	89.372	88.624	92.84	2.184	2.092	2.016	2.011	2.061		174.72	156.838	0.298033
METDOE	99.6	97.746	106.028	143.593	82.686	161.426	90.497	110.345	91.062	85.102	2.581	1.854	1.877	1.978	2.609		161.426	143.593	0.297217
ZAPWAR	86.874	97.52	88.888	86.874	97.52	106.411	147.178	164.96	106.411	88.888	2.468	2.113	2.468	2.113	1.77		164.96	147.178	0.296367
HALBAX	103.957	96.007	87.587	177.596	91.886	159.826	87.75	91.085	90.247	90.628	2.024	2.245	1.979	1.985	1.994		177.596	159.826	0.296167
XEKHAW	159.482	87.544	94.16	89.31	177.189	93.438	106.226	91.399	93.364	86.639	2.441	1.906	1.99	2.374	2.389		177.189	159.482	0.295117
BUNYIS	68.687	73.237	123.316	120.558	95.294	140.953	103.147	115.971	104.649	93.636	2.188	1.33	1.666	1.76	2.188		140.953	123.316	0.29395
GEGZUN	111.108	92.528	133.72	77.076	151.356	105.308	112.904	79.764	89.243	103.195	2.26	1.735	1.717	2.367	2.236		151.356	133.72	0.293933
YUXSEP	92.647	92.534	93.745	157.229	84.765	174.819	93.149	107.624	86.561	93.615	2.128	2.199	2.025	1.916	2.076		174.819	157.229	0.293167
TEMTAG	79.065	95.903	92.297	95.205	153.865	78.181	171.33	101.255	103.708	85.842	1.648	1.906	2.372	2.32	2.305		171.33	153.865	0.291083
USALOQ	100.823	106.511	94.2	169.648	92.082	152.206	85.462	95.807	87.6	90.06	2.014	2.122	1.976	1.969	1.991		169.648	152.206	0.2907
XUBNIR02	104.275	157.516	88.938	174.952	89.673	98.208	92.209	89.36	90.082	92.817	2.621	2.018	1.996	2.001	2.016		174.952	157.516	0.2906
XERRUK	88.915	90.247	91.261	92.673	87.746	158.487	100.427	175.864	101.084	91.626	2.238	1.815	1.773	1.792	2.244		175.864	158.487	0.289617
GOCLUF	108.89	85.122	150.596	96.029	167.887	89.003	100.51	84.671	96.066	88.146	2.805	2.004	2.245	2.196	2.196		167.887	150.596	0.288183
VUTRAD	98.169	167.692	89.555	150.401	87.199	94.135	107.41	90.535	86.486	101.87	1.935	2.037	2.079	2.053	1.986		167.692	150.401	0.288183
AVECOU	105.453	85.758	80.959	82.971	83.907	114.393	114.982	147.902	130.622	106.5	2.3	2.31	2.277	2.299	2.273		147.902	130.622	0.288
ZABTAX	90.675	90.525	86.164	85.366	89.874	153.911	94.271	171.026	111.812	92.904	2.281	2.07	2.282	2.066	2.24		171.026	153.911	0.28525
PZCLCU	98.673	88.167	162.035	91.693	179.088	86.797	98.673	91.693	88.167	94.115	2.718	2.304	2.304	2.282	2.359		179.088	162.035	0.284217
UKEZIV	100.628	100.292	92.034	176.112	86.879	159.078	86.415	91.78	93.18	92.141	1.964	2.088	2.155	2.16	1.968		176.112	159.078	0.2839
XEFVEJ	156.958	93.179	91.634	88.657	173.966	85.751	111.347	92.522	89.203	89.775	2.467	2.038	1.808	2.382	2.402		173.966	156.958	0.283467
XUBNIR06	92.111	90.24	174.589	88.938	157.617	98.326	93.244	89.005	89.756	104.057	2.622	1.999	1.994	2.008	2.013		174.589	157.617	0.282867
NUQMAP	104.266	157.602	88.91	174.561	89.472	98.132	92.404	89.282	90.246	93.013	2.615	2.003	2.001	1.999	2.011		174.561	157.602	0.28265
GOQGOK	95.524	83.245	158.155	102.077	90.039	175.058	88.234	99.039	91.168	94.884	2.478	2.102	2.085	1.818	2.359		175.058	158.155	0.281717
AYACUA	85.677	85.053	146.762	99.434	98.645	163.635	91.412	113.782	88.984	97.428	2.495	1.841	1.813	1.994	2.493		163.635	146.762	0.281217
IXAQII	101.377	90.322	88.519	90.322	88.519	92.941	92.941	157.246	174.119	101.377	2.116	1.947	2.257	1.947	2.257		174.119	157.246	0.281217
YINNUE	161.416	87.343	89.028	110.146	105.256	87.499	84.892	97.077	144.591	101.504	2.19	1.762	1.774	1.823	1.775		161.416	144.591	0.280417
GOXQOZ	71.17	71.233	117.822	124.468	104.72	141.27	96.67	117.71	92.662	100.597	2.449	1.699	1.766	1.79	2.435		141.27	124.468	0.280033
SOPVIC	88.276	160.645	98.371	106.082	86.891	87.212	110.062	85.697	100.858	143.846	2.289	1.778	1.791	1.753	1.779		160.645	143.846	0.279983
MPCPDS	89.778	81.325	166.771	92.109	113.62	96.319	89.07	95.448	85.704	150.045	2.434	2.345	2.325	2.265	2.956		166.771	150.045	0.278767
YUXSEP	93.402	108.357	85.813	174.657	91.72	158.035	87.654	97.767	90.903	88.173	2.107	2.268	2.162	1.929	2.043		174.657	158.035	0.277033
QALHEQ	96.477	101.21	91.991	178.115	87.5	161.512	92.487	89.89	92.24	87.19	2.046	2.274	1.974	1.959	2.036		178.115	161.512	0.276717
WUJQIC	94.224	88.427	170.586	92.132	154.072	106.119	95.185	86.58	88.683	99.617	2.531	2.005	2.008	2.054	2.279		170.586	154.072	0.275233
GAYSAA	101.84	153.048	88.149	169.556	91.942	104.71	91.739	88.585	86.507	98.641	2.461	2.064	2.067	2.043	2.32		169.556	153.048	0.275133
XERSIZ	90.049	174.538	88.912	100.969	92.731	88.912	158.061	92.731	90.049	100.969	2.222	1.848	2.222	1.793	1.848		174.538	158.061	0.274617
XUBNIR05	103.587	88.981	158.337	89.587	174.763	92.299	98.076	89.364	90.118	92.919	2.615	2.009	2.015	2.005	1.997		174.763	158.337	0.273767
XUBNIR	92.86	89.603	89.217	89.257	90.028	97.918	103.605	174.888	158.477	92.24	2.615	1.997	2.013	1.999	2.009		174.888	158.477	0.273517
KIGNEU	91.191	89.981	86.979	86.979	91.191	157.634	101.183	173.958	101.183	89.981	2.025	1.94	2.288	1.94	2.025		173.958	157.634	0.272067
BEHQUB	107.288	99.002	96.749	88.159	87.598	85.579	90.017	104.697	164.247	147.955	1.945	1.939	2.03	1.976	2.047		164.247	147.955	0.271533
FUPQOW	95.81	92.654	85.192	85.971	91.546	93.638	114.332	168.284	152.028	94.832	1.976	2.13	1.998	2.123	1.999		168.284	152.028	0.270933
XUBNIR07	103.511	89.087	158.486	89.62	174.687	92.243	98.003	89.264	90.063	93.054	2.616	2.02	2.016	2.002	1.999		174.687	158.486	0.270017
PESFOI	156.126	85.828	72.715	87.919	172.327	93.039	131.064	87.734	86.186	94.538	2.411	1.552	1.512	2.327	2.326		172.327	156.126	0.270017
SPHENC	83.263	101.163	161.291	95.611	104.865	109.853	84.341	86.676	96.2	145.092	2.062	2.11	2.232	2.007	2.028		161.291	145.092	0.269983
QULXEB	155.923	103.454	91.206	172.079	92.856	100.473	89.39	88.516	94.907	87.65	1.943	1.971	1.974	1.986	2.145		172.079	155.923	0.269267
GOQGEA	95.709	82.688	158.589	101.275	90.463	174.72	87.789	99.477	91.905	94.767	2.501	2.089	2.101	1.808	2.349		174.72	158.589	0.26885
FAWVUV	138.319	135.233	94.918	154.395	98.423	86.053	80.653	85.392	99.223	82.213	1.484	2.135	2.339	2.391	2.224		154.395	138.319	0.267933
JEDVAQ	90.105	158.509	90.92	87.251	100.745	90.92	174.502	100.745	90.105	87.251	1.956	2.03	1.956	2.235	2.03		174.502	158.509	0.26655
GARRUM	89.507	173.476	94.316	104.982	90.297	86.249	97.327	91.741	91.141	157.49	1.996	1.916	2.238	1.985	1.937		173.476	157.49	0.266433
ODIFOW	171.981	82.507	78.138	96.063	155.999	92.467	109.164	86.572	102.469	95.745	2.731	1.56	2.282	2.296	2.303		171.981	155.999	0.266367
BAHVUB	89.694	160.579	89.694	91.812	99.711	89.694	176.376	99.711	89.694	91.812	2.043	2.028	2.043	2.29	2.028		176.376	160.579	0.263283
KIZHAE	127.644	99.526	126.117	96.842	143.393	71.247	106.232	99.777	96.445	72.313	1.684	1.755	1.776	2.425	2.417		143.393	127.644	0.262483
XEFVIN	159.003	93.857	90.274	88.79	174.713	86.537	110.722	91.211	89.682	89.27	2.467	2.104	1.794	2.401	2.377		174.713	159.003	0.261833
EZIPUY	112.956	83.834	150.219	90.305	134.531	91.881	94.368	79.56	83.647	133.563	2.37	2.729	2.707	2.397	2.354		150.219	134.531	0.261467
CASWOI01	89.658	93.989	86.109	93.989	86.109	98.146	98.146	179.315	163.707	89.658	1.941	2.07	2.379	2.07	2.379		179.315	163.707	0.260133
BEWDUF	90.894	91.029	90.873	90.074	87.658	98.254	98.762	178.315	162.845	90.339	2.284	2.033	1.963	1.957	1.974		178.315	162.845	0.257833
BRPINP	86.851	90.82	92.927	95.548	86.333	104.771	155.922	171.392	99.307	86.026	2.544	2.326	2.287	2.311	2.923		171.392	155.922	0.257833
IXAQOO	90.452	97.123	160.608	89.08	92.342	91.509	89.349	89.835	102.267	176.072	2.239	1.931	1.95	2.257	2.127		176.072	160.608	0.257733
UFETII	91.664	160.48	89.03	87.955	99.76	89.03	175.91	99.76	91.664	87.955	1.953	2.049	1.953	2.298	2.049		175.91	160.48	0.257167
JUVKIU	92.418	87.613	173.012	96.276	104.434	157.609	86.893	90.706	90.381	97.956	1.962	2.056	2.036	2.194	1.953		173.012	157.609	0.256717
ANAYOE	158.981	89.226	74.7	90.356	174.308	94.023	126.25	86.343	85.025	91.389	2.442	1.54	1.541	2.3	2.302		174.308	158.981	0.25545
BOCCEB10	90.238	88.596	102.028	163.694	92.05	178.831	90.736	94.232	89.586	87.956	2.002	2.358	2.043	2.05	1.961		178.831	163.694	0.252283
JAJDEE	157.233	90.98	93.098	105.227	108.946	79.63	82.306	108.888	142.116	93.809	2.916	2.073	1.982	1.949	1.987		157.233	142.116	0.25195
BOHBAB	98.64	160.395	89.108	175.4	90.106	100.964	92.975	89.575	89.657	91.58	2.216	2.022	2.003	1.996	2.023		175.4	160.395	0.250083
CASWOI10	88.16	92.553	178.559	95.345	163.575	94.211	91.135	86.032	86.244	102.09	1.944	2.078	2.065	2.403	2.359		178.559	163.575	0.249733
ICUJUN	169.706	93.45	86.194	115.404	154.743	93.45	86.194	88.508	89.853	88.508	1.943	1.943	2.311	1.983	1.986		169.706	154.743	0.249383
QEFHIU	89.495	91.267	161.578	106.489	87.687	176.532	87.296	91.875	90.922	95.67	1.946	2.044	2.056	2.224	1.932		176.532	161.578	0.249233
METVUC	77.013	64.374	119.485	126.595	97.415	141.374	97.959	113.609	99.955	98.852	2.425	1.479	1.781	1.782	2.419		141.374	126.595	0.246317
WAJRII01	94.266	91.633	85.221	94.266	91.633	98.995	162.01	176.733	98.995	85.221	2.058	2.288	2.058	2.288	2.846		176.733	162.01	0.245383
CUWQAO	90.025	91.815	87.832	91.679	88.773	93.57	101.782	179.341	164.643	89.642	3.236	2.039	2.019	2.015	2.006		179.341	164.643	0.244967
WEZYIJ	95.592	102.85	91.19	176.11	89.125	161.492	90.011	92.075	88.087	91.775	1.978	2.282	1.966	1.994	1.983		176.11	161.492	0.243633
GEKHUZ	98.272	89.541	90.745	89.541	90.745	89.008	89.008	163.455	178.016	98.272	2.211	2.078	1.948	2.078	1.948		178.016	163.455	0.242683
WEJYUH	93.369	89.703	177.143	91.15	162.597	96.769	89.488	88.301	89.985	100.605	2.26	2.061	2.035	1.928	1.957		177.143	162.597	0.242433
BAPHEF	168.705	88.667	93.586	89.811	115.974	88.667	93.586	85.654	154.216	85.654	1.947	1.947	1.964	2.342	1.983		168.705	154.216	0.241483
CNOPIR	86.845	92.716	175.713	90.07	97.408	161.288	88.901	91.285	91.142	101.304	2.344	2.408	2.407	1.972	1.858		175.713	161.288	0.240417
QAQCAO	66.684	99.495	117.03	88.525	161.672	91.475	176.096	97.777	89.07	89.748	1.53	2.292	2.39	2.305	2.324		176.096	161.672	0.2404
PYTZCM	102.669	88.637	90.021	86.951	88.384	97.538	95.245	152.717	167.13	104.607	2.412	2.274	2.256	2.277	2.245		167.13	152.717	0.240217
PESBEU	93.029	94.734	85.02	93.029	94.734	101.877	156.245	170.531	101.877	85.02	2.026	2.197	2.026	2.197	2.103		170.531	156.245	0.2381
QEFHIU	88.381	88.736	161.449	95.59	94.49	175.623	92.131	102.959	89.556	89.367	1.962	2.053	2.042	2.288	1.999		175.623	161.449	0.236233
YUXSEP01	90.347	174.931	88.808	99.601	92.535	88.808	160.798	92.535	90.347	99.601	1.991	2.034	1.991	2.164	2.034		174.931	160.798	0.23555
VUWVUE	169.633	92.938	91.217	94.449	108.944	84.464	87.139	96.93	155.528	93.404	3.052	2.847	2.418	2.65	2.389		169.633	155.528	0.235083
PEGTIF	88.733	93.179	105.757	88.029	92.858	86.154	91.268	96.322	160.838	174.898	2.025	2.293	1.989	1.997	2.014		174.898	160.838	0.234333
QUGDAX	92.726	104.218	103.169	91.943	84.124	86.873	91.541	98.994	152.612	166.671	2.361	2.109	1.853	1.907	2.343		166.671	152.612	0.234317
FULTUC	90.728	90.316	89.191	90.728	90.316	97.341	165.317	179.369	97.341	89.191	1.999	2.088	1.999	2.088	2.035		179.369	165.317	0.2342
CUYPAN10	93.531	159.95	101.646	109.228	86.637	85.476	104.561	83.053	97.969	146.043	2.255	1.803	1.78	1.757	1.798		159.95	146.043	0.231783
POCGEV	91.157	91.841	98.262	163.122	88.027	176.98	88.083	98.612	91.838	91.173	2.017	2.263	1.992	1.995	2.016		176.98	163.122	0.230967
AVITOQ02	92.1	87.858	99.87	165.763	90.752	179.488	90.387	94.351	89.117	89.76	2.016	2.376	1.958	1.952	2.02		179.488	165.763	0.22875
IMEKAM	91.271	88.404	165.069	101.26	90.649	178.732	90.417	93.556	89.584	90.595	1.987	2.037	2.035	2.276	1.979		178.732	165.069	0.227717
NULWAS	88.467	88.354	169.655	97.217	101.413	156.061	92.505	92.624	86.586	102.432	2.193	2.371	2.348	2.341	2.191		169.655	156.061	0.226567
NULWAS01	88.467	88.354	169.655	97.217	101.413	156.061	92.505	92.624	86.586	102.432	2.193	2.371	2.348	2.341	2.191		169.655	156.061	0.226567
BUNYIS	76.38	67.857	106.831	125.797	92.855	140.886	98.323	127.316	106.553	96.556	2.175	1.209	1.68	1.745	2.177		140.886	127.316	0.226167
AMALEG	89.092	89.092	97.684	164.632	89.792	178.184	89.792	97.684	90.451	90.451	2.01	2.325	1.957	1.957	2.01		178.184	164.632	0.225867
FEQVUV	105.176	91.386	92.29	176.977	92.439	163.429	92.273	90.733	87.5	86.923	1.93	2.213	1.965	1.979	1.948		176.977	163.429	0.2258
ISEXUA	88.72	87.681	162.082	96.146	106.566	148.584	88.534	101.677	85.473	104.727	2.026	2.188	2.127	2.046	2.013		162.082	148.584	0.224967
GUHVAI	99.122	94.926	160.646	88.734	174.129	91.783	100.195	89.768	85.67	90.949	2.645	2.29	2.326	1.955	1.972		174.129	160.646	0.224717
BAWLES	91.193	173.513	95.234	102.042	88.056	89.341	97.685	89.252	91.101	160.144	2.034	2.043	2.262	2.019	2.032		173.513	160.144	0.222817
TETLAF	139.116	87.016	84.802	102.989	104.642	83.554	85.513	108.094	152.366	112.784	1.998	2.233	1.926	1.864	1.901		152.366	139.116	0.220833
WEJYUH	88.663	89.358	178.11	88.404	164.899	93.792	93.091	91.943	89.825	101.278	2.196	2.043	2.018	1.945	1.944		178.11	164.899	0.220183
ILAZUQ	93.45	89.899	89.604	113.471	86.884	170.075	93.024	156.912	96.342	86.379	2.367	1.861	2.081	2.397	2.366		170.075	156.912	0.219383
BZGPCU10	89.451	91.059	176.161	88.71	97.108	163.059	88.062	94.595	90.469	99.73	1.97	2.039	2.038	2.291	1.95		176.161	163.059	0.218367
NIMPUV	87.659	91.107	173.695	91.361	84.341	115.009	88.301	90.845	94.988	160.608	1.929	2.039	2.042	1.939	2.322		173.695	160.608	0.218117
GALVIY	102.642	86.211	156.636	85.406	143.634	107.473	100.656	85.467	88.484	108.888	1.806	2.262	1.774	1.781	1.81		156.636	143.634	0.2167
RUMGAH	88.302	91.5	177.685	90.703	164.702	94.442	90.613	87.494	90.622	100.782	2.221	1.995	2.002	2.002	1.961		177.685	164.702	0.216383
LAQROK	90.242	165.957	89.893	89.448	97.022	89.893	178.897	97.022	90.242	89.448	1.973	2.03	1.973	2.28	2.03		178.897	165.957	0.215667
TUTTAE	99.136	96.105	90.834	177.617	90.055	164.68	89.386	87.66	91.942	89.031	1.978	2.35	1.998	1.997	1.967		177.617	164.68	0.215617
SEZBAC	87.728	171.577	86.969	97.098	91.724	92.219	158.709	96.464	90.071	103.984	2.291	1.839	1.799	1.805	1.85		171.577	158.709	0.214467
QALZIM	92.003	98.888	88.762	92.003	98.888	87.525	175.049	162.223	87.525	88.762	1.939	2.03	1.939	2.03	2.216		175.049	162.223	0.213767
YAPPOU	91.621	176.931	87.955	97.945	91.534	87.955	164.111	91.534	91.621	97.945	2.015	2.074	2.015	2.052	2.074		176.931	164.111	0.213667
BPINPA	162.164	98.624	92.501	174.953	88.863	99.206	87.61	92.474	91.234	87.393	2.529	2.273	2.318	2.269	3.017		174.953	162.164	0.21315
SAGHEO	106.365	92.746	109.158	148.105	90.061	160.889	86.089	102.729	87.745	85.707	1.972	1.952	2.026	2.027	1.999		160.889	148.105	0.213067
RACXUP	90.462	100.767	97.078	90.04	90.731	90.352	87.363	94.34	162.026	174.791	2.02	2.244	2.008	2.002	1.985		174.791	162.026	0.21275
NUJQAK	107.319	88.159	91.799	91.024	89.585	90.054	87.827	165.044	177.767	87.461	2.437	2.039	2.025	2.066	2.016		177.767	165.044	0.21205
XIDPEG	86.008	87.174	146.113	106.611	100.311	158.663	87.408	107.275	87.046	101.018	2.238	1.764	1.771	1.774	2.234		158.663	146.113	0.209167
TEMYER	88.359	93.941	177.532	96.229	96.431	165.047	90.167	85.948	86.981	98.47	2.38	1.868	2.073	2.038	2.379		177.532	165.047	0.208083
LEFGOS	88.267	173.553	89.483	103.257	95.37	89.307	95.336	88.823	84.795	161.151	1.972	1.98	2.295	1.955	1.966		173.553	161.151	0.2067
EBZPPT10	86.881	84.567	92.964	98.577	86.24	98.871	154.532	166.908	106.473	85.346	2.541	2.31	2.257	2.341	3.141		166.908	154.532	0.206267
FIGWEZ	88.979	88.969	93.629	93.618	88.813	160.263	102.314	172.638	97.406	90.741	2.299	2.009	2.195	2.022	2.352		172.638	160.263	0.20625
CEZWUA	177.797	93.199	89.83	165.452	95.187	84.839	89.504	89.495	99.36	91.677	1.943	1.931	1.958	1.991	2.232		177.797	165.452	0.20575
XARXAS	91.526	166.72	88.591	89.494	96.64	88.591	178.987	96.64	91.526	89.494	1.961	2.092	1.961	2.029	2.092		178.987	166.72	0.20445
LOMRAI	90.258	91.488	164.275	90.377	89.488	87.954	87.922	92.203	104.048	176.495	1.99	2.011	1.996	2.027	2.398		176.495	164.275	0.203667
KOGFAO	100.792	88.833	163.674	88.65	175.869	91.862	95.534	90.68	90.664	92.258	2.213	2.024	2.005	2.035	2.014		175.869	163.674	0.20325
ZIGBAU01	177.913	91.331	94.266	91.864	165.732	89.263	83.652	88.456	102.376	91.461	2.167	2.195	2.639	2.238	2.232		177.913	165.732	0.203017
MBZPBT10	86.23	88.115	92.632	98.408	85.913	97.145	156.427	168.559	106.357	84.843	2.535	2.308	2.248	2.313	3.027		168.559	156.427	0.2022
HEHJIP	88.42	162.499	92.399	87.31	98.751	92.399	174.62	98.751	88.42	87.31	1.93	1.998	1.93	2.226	1.998		174.62	162.499	0.202017
SOQYUT	92.042	89.777	88.339	91.604	89.504	97.4	97.642	177.015	164.897	90.924	2.432	1.954	1.969	2.013	2.038		177.015	164.897	0.201967
WEVYAX	85.916	101.76	94.756	90.826	85.258	90.846	92.271	97.11	163.37	175.48	1.929	2.248	1.951	1.952	1.974		175.48	163.37	0.201833
GOXQOZ	98.434	98.745	111.417	150.704	94.062	162.805	86.199	97.407	86.859	84.453	2.482	1.78	1.801	2.199	2.471		162.805	150.704	0.201683
YAGDUG	92.493	89.529	89.539	89.648	89.407	100.371	97.688	174.015	161.941	93.492	2.755	1.995	2.018	1.999	2.016		174.015	161.941	0.201233
QAQNOM	95.58	87.931	102.025	164.107	91.164	176.175	89.123	93.849	88.657	90.118	2.045	2.312	1.945	1.98	2.04		176.175	164.107	0.201133
PAQXOV	102.625	86.269	99.024	158.884	87.709	170.909	88.664	102.008	91.816	88.58	2.473	2.381	2.391	2.377	1.713		170.909	158.884	0.200417
YIWLEW	70.985	108.652	95.729	163.488	95.6	175.469	83.054	95.257	92.519	88.927	1.406	1.962	2.323	2.324	2.423		175.469	163.488	0.199683
COLVII	105.801	99.969	104.173	88.572	85.041	84.014	87.517	110.017	155.775	143.827	2.338	1.836	1.872	2.337	2.358		155.775	143.827	0.199133
AWICOY	87.759	83.735	103.773	157.88	86.743	169.708	93.42	98.303	94.222	88.771	2.067	2.236	1.982	2.08	1.926		169.708	157.88	0.197133
JACBOE	101.036	86.78	171.946	90.926	160.175	98.046	86.693	89.71	89.917	101.776	2.717	2.043	2.047	2.425	2.501		171.946	160.175	0.196183
FETKEW	108.865	101.793	99.443	161.096	88.484	149.342	86.567	99.443	88.484	86.567	1.934	2.275	2.213	2.213	2.447		161.096	149.342	0.1959
QOTKIU01	90.796	167.415	89.296	89.582	96.293	89.296	179.163	96.293	90.796	89.582	1.937	2.017	1.937	2.257	2.017		179.163	167.415	0.1958
ACPLRH	97.027	91.285	112.492	85.942	95.947	93.698	82.293	90.05	156.173	167.903	2.388	1.971	2.391	2.384	2.285		167.903	156.173	0.1955
XATMIQ	89.282	158.466	90.71	91.467	95.277	87.311	170.189	106.253	89.108	97.954	1.91	1.915	1.912	2.138	1.971		170.189	158.466	0.195383
FUMLOO	102.917	100.116	108.443	145.276	87.915	156.95	89.716	106.201	83.845	84.855	2.367	1.83	1.898	1.904	2.308		156.95	145.276	0.194567
XOKJAJ	161.153	103.314	88.987	172.78	94.125	95.426	88.067	90.966	92.911	89.657	1.99	2.034	2.002	1.997	2.191		172.78	161.153	0.193783
CUACPI	98.705	97.611	88.908	175.305	91.482	163.681	88.368	93.361	92.291	87.226	1.937	2.336	2.053	2.055	1.944		175.305	163.681	0.193733
CIGSAM	96.146	99.472	87.899	175.891	89.201	164.361	92.427	90.423	87.378	91.481	2.247	2.298	1.991	1.994	2.267		175.891	164.361	0.192167
ZILYAW	93.242	177.862	87.012	96.826	88.931	87.012	166.348	88.931	93.242	96.826	1.948	1.98	1.948	2.214	1.98		177.862	166.348	0.1919
BOKCAF	116.255	62.972	75.824	163.838	91.951	175.274	90.474	116.69	84.818	92.464	2.364	1.844	2.023	1.806	2.367		175.274	163.838	0.1906
ACTHCU	175.088	91.505	88.005	93.284	102.954	92.553	87.323	85.499	163.669	96.278	2.273	1.983	2.025	2.292	2.296		175.088	163.669	0.190317
GARTID	90.401	100.348	94.918	92.9	90.292	88.324	87.314	93.997	164.147	175.561	2.11	2.131	2.142	2.134	2.148		175.561	164.147	0.190233
FUVHIN	100.009	107.067	92.815	95.707	155.549	87.747	166.947	97.209	86.155	85.163	2.519	1.923	2.275	2.263	2.524		166.947	155.549	0.189967
TIMPIO	96.39	89.814	90.346	89.814	90.346	89.281	89.281	167.22	178.563	96.39	2.189	1.992	1.988	1.992	1.988		178.563	167.22	0.18905
PIWSOD	95.845	89.097	90.939	89.097	90.939	89.822	89.822	168.311	179.644	95.845	2.243	2.074	1.893	2.074	1.893		179.644	168.311	0.188883
UWIPOG	92.185	89.554	170.36	96.77	93.926	159.076	84.274	92.836	90.6	106.803	2.385	2.094	2.069	2.048	2.42		170.36	159.076	0.188067
DOLMOG	87.891	91.552	97.354	98.15	86.404	153.192	112.619	164.466	94.042	87.05	2.39	2.332	2.207	2.369	2.384		164.466	153.192	0.1879
SAMQAY	82.76	161.556	86.237	102.979	102.051	90.691	150.284	96.322	91.165	105.608	2.273	2.079	1.782	2.204	2.264		161.556	150.284	0.187867
TARJIH	88.022	91.57	168.018	94.319	90.725	179.276	88.643	97.181	91.638	89.92	1.936	2.024	2.035	2.262	1.937		179.276	168.018	0.187633
DEQYOO	89.35	97.304	91.08	89.35	97.304	88.306	176.613	165.392	88.306	91.08	1.959	2.009	1.959	2.009	2.306		176.613	165.392	0.187017
LOMQUB	176.663	89.228	91.438	90.49	104.056	87.589	91.895	86.164	165.45	93.637	2.001	2.028	2.007	2.416	1.996		176.663	165.45	0.186883
OZANEK	176.202	90.047	90.07	96.659	98.337	88.919	89.983	90.718	165	93.048	2.412	1.834	2.411	1.956	2.416		176.202	165	0.1867
MASONI10	96.399	101.994	105.935	88.247	89.201	87.068	87.359	100.45	151.955	163.149	2.005	1.937	2.004	2.005	2		163.149	151.955	0.186567
AYALUJ	79.986	91.853	160.676	90.019	131.653	149.483	81.689	92.246	100.924	78.374	1.796	2.407	2.416	1.794	1.831		160.676	149.483	0.18655
DEYYAI	101.384	148.881	84.889	160.058	91.51	109.418	98.028	79.929	94.914	97.588	2.419	2.032	1.983	1.969	2.277		160.058	148.881	0.186283
ZIGBAU	104.355	89.177	95.137	177.612	92.32	166.445	90.791	82.743	88.741	88.677	2.236	2.605	2.186	2.159	2.244		177.612	166.445	0.186117
GOQFUP	124.253	80.305	84.113	92.101	162.609	89.855	151.47	83.497	92.494	94.07	2.458	1.499	1.985	2.077	2.338		162.609	151.47	0.18565
SAMRII	89.507	105.551	97.142	88.43	161.376	88.769	172.451	92.765	86.014	94.84	2.711	1.963	2.055	2.28	2.759		172.451	161.376	0.184583
YUCDOP	96.137	91.286	88.843	91.286	88.843	89.395	89.395	167.725	178.789	96.137	2.196	2.028	1.944	2.028	1.944		178.789	167.725	0.1844
LOJDAR	102.825	96.665	104.145	89.747	163.992	82.273	153.03	97.171	94.643	86.837	2.509	1.846	1.756	2.477	2.458		163.992	153.03	0.1827
COCLEM	90.329	175.592	90.26	97.684	87.796	90.26	164.631	87.796	90.329	97.684	1.996	1.966	1.996	2.297	1.966		175.592	164.631	0.182683
QOTKIU	95.952	90.588	89.513	90.588	89.513	89.511	89.511	168.096	179.023	95.952	2.281	2.025	1.939	2.025	1.939		179.023	168.096	0.182117
XOGVEU	91.395	173.465	89.593	98.698	86.733	89.593	162.605	86.733	91.395	98.698	2.028	1.992	2.028	2.265	1.992		173.465	162.605	0.181
BNPORH	90.877	89.304	103.323	87.687	176.54	87.8	165.7	94.033	90.657	93.057	2.539	2.038	2.272	2.327	2.538		176.54	165.7	0.180667
BOHYED	99.064	101.126	95.712	170.273	92.085	159.444	88.632	94.003	85.579	90.313	2.011	2.044	2.109	2.12	2.045		170.273	159.444	0.180483
GELKOX	96.235	89.967	90.217	89.967	90.217	89.153	89.153	167.53	178.305	96.235	2.423	2.013	1.961	2.013	1.961		178.305	167.53	0.179583
SECKIX	100.365	94.29	89.346	176.082	90.079	165.334	90.123	94.569	89.465	89.333	1.878	2.296	1.85	1.874	1.846		176.082	165.334	0.179133
KAHMAK01	89.471	96.257	90.722	89.471	96.257	89.117	178.234	167.487	89.117	90.722	1.942	2.015	1.942	2.015	2.287		178.234	167.487	0.179117
LEDGIL	95.58	90.619	176.423	88.532	165.732	98.305	87.947	90.517	89.459	95.738	2.371	2.037	2	2.025	2.039		176.423	165.732	0.178183
NICZII	91.063	90.348	118.944	80.879	87.246	170.816	93.44	160.159	93.815	88.353	2.33	2.458	1.907	2.034	2.341		170.816	160.159	0.177617
ASOFIY	129.033	84.698	82.134	96.485	159.316	90.404	148.714	80.767	96.011	87.426	2.466	1.466	1.987	2.358	2.368		159.316	148.714	0.1767
ICNPIR	91.905	86.126	168.186	94.04	101.246	157.608	90.136	96.978	87.559	101.134	1.699	2.352	2.366	1.9	2.667		168.186	157.608	0.1763
HAKMUD	90.586	88.883	163.54	99.139	95.068	174.117	90.236	97.287	88.621	90.811	2.289	1.981	1.974	2.769	2.278		174.117	163.54	0.176283
HOWCOL	87.281	177.261	88.984	166.717	92.075	95.41	97.401	87.164	91.175	95.11	2.638	2.002	2.307	2.309	2.261		177.261	166.717	0.175733
JIHXUW	110.658	90.455	86.578	87.308	173.202	94.834	162.665	92.16	86.584	90.114	2.327	1.916	1.927	2.061	2.061		173.202	162.665	0.175617
MILHAQ	95.251	90.808	167.534	91.286	178.06	86.45	97.214	88.496	89.785	91.81	2.314	1.97	2.001	1.935	1.952		178.06	167.534	0.175433
IXAQOO	90.87	98.297	88.252	90.87	98.297	93.044	173.912	163.405	93.044	88.252	2.252	1.936	2.252	1.936	2.138		173.912	163.405	0.175117
DOTDUL	96.827	89.309	91.066	89.309	91.066	88.424	88.424	166.346	176.847	96.827	2.196	2.045	1.954	2.045	1.954		176.847	166.346	0.175017
KAHMUE	89.244	95.428	90.793	89.244	95.428	89.804	179.609	169.143	89.804	90.793	1.959	2.023	1.959	2.023	2.243		179.609	169.143	0.174433
RITNIR	92.453	95.499	171.228	80.164	98.262	160.795	87.646	91.164	87.12	99.024	2.435	1.853	2.047	2.383	2.418		171.228	160.795	0.173883
HANWEY	89.756	87.68	94.998	85.992	93.831	93.21	87.504	79.428	177.234	166.829	2.342	1.518	2.094	2.345	2.352		177.234	166.829	0.173417
PTBCUM12	91.17	95.963	88.992	91.17	95.963	89.22	178.441	168.074	89.22	88.992	1.943	2.034	1.943	2.034	2.253		178.441	168.074	0.172783
KAHMAK	91.885	98.472	89.09	91.885	98.472	86.691	173.381	163.057	86.691	89.09	1.946	2.021	1.946	2.021	2.22		173.381	163.057	0.172067
PTBCUM11	88.991	89.447	96.327	168.061	91.217	178.381	91.131	95.599	89.469	88.507	1.952	2.253	2.031	2.038	1.934		178.381	168.061	0.172
KIZGOR	126.151	99.527	129.367	93.211	139.603	70.532	104.477	103.184	97.643	69.083	2.015	1.775	1.787	2.418	2.429		139.603	129.367	0.1706
COCNEO	89.89	90.223	89.447	89.447	90.223	168.6	100.736	178.812	90.663	89.89	2.287	2.273	2.511	2.273	2.276		178.812	168.6	0.1702
BEBPEG	91.187	88.777	92.019	87.748	108.412	95.83	173.009	162.81	90.449	87.354	2.406	1.802	2.408	2.433	1.983		173.009	162.81	0.169983
IXARAB	87.577	100.386	90.517	87.577	100.386	95.291	169.419	159.229	95.291	90.517	2.249	1.913	2.249	1.913	2.173		169.419	159.229	0.169833
KAHLUD	91.369	96.083	88.842	91.369	96.083	89.004	178.007	167.833	89.004	88.842	1.942	2.025	1.942	2.025	2.275		178.007	167.833	0.169567
QONHIK	151.141	90.949	88.449	100.522	98.028	86.329	85.22	99.389	161.288	109.445	1.95	1.986	2.071	1.938	2.015		161.288	151.141	0.169117
NIBZEE	91.204	83.843	169.288	88.134	159.187	103.634	99.27	92.846	91.458	96.961	2.643	2.876	2.78	2.637	2.598		169.288	159.187	0.16835
APSUCC	92.102	92.818	100.851	164.991	90.638	175.079	90.055	94.157	88.885	89.142	1.999	2.281	2.038	2.048	1.999		175.079	164.991	0.168133
HIDPAO	97.207	89.959	90.584	89.959	90.584	87.833	87.833	165.587	175.667	97.207	2.266	2.027	1.935	2.027	1.935		175.667	165.587	0.168
PEMVUA	95.431	97.43	88.037	95.238	166.461	91.193	176.529	95.77	88.218	84.567	2.432	1.994	1.81	2.403	2.418		176.529	166.461	0.1678
ELERAQ	90.691	178.977	89.21	95.535	90.512	89.21	168.931	90.512	90.691	95.535	1.966	2.01	1.966	2.212	2.01		178.977	168.931	0.167433
IJINUM	88.576	91.796	171.308	96.145	86.326	112.352	84.027	89.396	95.229	161.263	2.418	2.386	2.398	1.78	2.019		171.308	161.263	0.167417
HABTUA	163.198	92.568	93.97	173.239	95.454	102.466	93.179	84.606	91.209	86.513	2.075	2.164	2.118	2.157	2.171		173.239	163.198	0.16735
AFEGUO	92.709	91.592	88.116	90.626	87.229	110.237	87.619	172.14	162.13	94.991	2.28	2.035	2.015	2.011	2.022		172.14	162.13	0.166833
XUBQIU	89.485	97.611	89.824	89.485	97.611	92.61	174.78	164.779	92.61	89.824	1.957	1.992	1.957	1.992	2.236		174.78	164.779	0.166683
TESFOO	94.249	100.093	96.356	175.645	91.297	165.646	91.873	87.475	86.004	89.901	2.009	2.242	1.977	1.995	2.013		175.645	165.646	0.16665
NUZDUH	88.603	89.709	95.666	168.333	91.99	178.31	90.931	95.934	89.307	88.114	1.947	2.306	2.046	2.048	1.964		178.31	168.333	0.166283
PTBCUM10	92.325	88.415	168.699	96.887	89.732	178.644	88.016	94.413	91.481	89.078	1.936	2.06	2.053	2.277	1.932		178.644	168.699	0.16575
AYOLUW	91.119	94.692	87.704	88.426	102.542	94.54	172.439	162.509	93.001	90.481	1.954	1.986	1.958	1.965	2.188		172.439	162.509	0.1655
FITYAJ	89.35	179.665	90.62	95.13	90.167	90.62	169.74	90.167	89.35	95.13	2.024	1.946	2.024	2.212	1.946		179.665	169.74	0.165417
PIKNUU	88.268	86.919	88.423	164.476	89.564	174.4	92.162	107.084	90.568	89.113	2.303	1.522	1.994	2.448	2.31		174.4	164.476	0.1654
VURMEA	94.619	89.597	90.686	90.842	88.701	92.721	88.214	169.142	178.998	96.173	2.202	2.022	1.955	2.063	1.936		178.998	169.142	0.164267
AGIDOJ	102.927	102.422	110.921	144.783	84.734	154.62	86.8	104.203	85.379	87.877	2.148	2.098	2.135	2.148	2.135		154.62	144.783	0.16395
QALZIM01	92.118	98.485	88.942	92.118	98.485	86.406	172.813	163.029	86.406	88.942	1.945	2.024	1.945	2.024	2.22		172.813	163.029	0.163067
ASOFEU	79.064	86.172	128.831	87.54	161.711	95.903	151.935	81.446	89.822	94.906	2.212	1.467	2.432	2.363	2.378		161.711	151.935	0.162933
PACPCU	93.893	98.766	91.732	176.564	91.588	166.788	89.278	85.664	86.589	93.13	2.027	2.236	1.981	1.966	2.055		176.564	166.788	0.162933
QEZXIC	85.936	83.781	93.39	99.111	89.759	112.125	156.3	166.059	91.298	85.078	2.719	2.321	2.251	2.313	3.237		166.059	156.3	0.16265
EBUDAG02	67.798	94.051	118.72	94.302	163.72	85.903	173.478	95.007	93.165	85.039	1.572	1.985	2.432	2.343	2.348		173.478	163.72	0.162633
IBIDEF	90.51	90.152	89.752	90.152	89.752	95.382	95.382	178.98	169.237	90.51	2.291	1.957	2.03	1.957	2.03		178.98	169.237	0.162383
YIDVEN	96.872	91.427	89.054	91.427	89.054	87.989	87.989	166.256	175.979	96.872	2.217	2.031	1.955	2.031	1.955		175.979	166.256	0.16205
PIWSUJ	91.699	87.923	176.088	90.404	166.451	96.732	92.035	90.317	90.479	96.748	2.494	2.01	1.952	1.895	1.947		176.088	166.451	0.160617
DUMDEW	83.185	85.223	87.387	177.726	89.414	168.093	91.56	94.882	90.621	88.869	2.345	1.591	2.16	2.06	2.319		177.726	168.093	0.16055
IJINUM	88.293	87.221	175.534	88.204	89.084	104.724	87.869	94.991	95.964	165.965	2.426	2.405	2.373	1.839	1.988		175.534	165.965	0.159483
PTBCUM02	94.993	96.105	88.405	178.457	91.805	168.899	92.278	90.169	87.76	88.434	2.032	2.272	1.929	1.934	2.038		178.457	168.899	0.1593
KAHMOY	91.638	96.682	88.809	91.638	96.682	88.083	176.165	166.635	88.083	88.809	1.933	2.016	1.933	2.016	2.285		176.165	166.635	0.158833
FORXAL	89.198	168.834	90.641	90.829	95.583	90.641	178.342	95.583	89.198	90.829	1.954	1.968	1.954	2.183	1.968		178.342	168.834	0.158467
JEMHUE	96.751	91.809	88.415	91.963	88.193	89.805	88.283	168.581	178.088	94.668	2.274	2.045	1.928	2.036	1.932		178.088	168.581	0.15845
ZENMAJ	78.916	89.838	144.036	92.164	101.756	97.285	91.398	82.878	125.92	153.517	2.325	1.578	2.43	2.354	2.205		153.517	144.036	0.158017
DEDPEJ	91.199	170.56	88.797	90.029	94.72	88.797	179.942	94.72	91.199	90.029	2.03	1.951	2.03	2.327	1.951		179.942	170.56	0.156367
NIVDIF	87.593	91.241	167.854	94.663	103.119	158.477	85.1	95.992	92.005	98.375	2.299	2.456	2.449	1.839	1.802		167.854	158.477	0.156283
HOSQUC	90.419	85.965	94.683	167.003	92.133	176.365	91.292	98.313	88.642	88.749	1.982	2.297	1.984	1.982	1.976		176.365	167.003	0.156033
TAPMUV	89.249	88.799	163.261	95.944	87.025	172.601	89.94	100.648	89.876	100.351	2.444	2.362	2.371	2.312	1.774		172.601	163.261	0.155667
FUSVOE	175.22	88.011	91.297	165.938	104.836	88.011	91.297	89.229	89.226	89.229	2.05	2.05	1.983	2.016	2.519		175.22	165.938	0.1547
XIYWAF01	87.952	104.184	91.337	86.915	75.89	90.583	168.953	178.204	78.899	93.843	2.592	2.387	2.63	2.392	2.711		178.204	168.953	0.154183
SONVAU	100.739	96.654	100.652	92.785	166.717	84.688	157.467	96.58	85.888	91.729	2.336	2.105	1.871	1.88	2.371		166.717	157.467	0.154167
XEMFEA	91.067	89.812	97.776	97.776	89.812	173.543	90.18	164.294	83.362	91.067	2.423	2.371	2.323	2.371	2.428		173.543	164.294	0.15415
QUDHAY	89.675	178.389	90.477	95.428	89.195	90.477	169.145	89.195	89.675	95.428	2.027	1.941	2.027	2.261	1.941		178.389	169.145	0.154067
KIWLOR	91.517	89.664	92.428	96.823	89.53	161.544	98.26	170.712	100.09	86.352	2.169	2.21	2.153	2.233	2.141		170.712	161.544	0.1528
QALHAM	96.226	97.243	85.66	175.675	86.846	166.531	89.548	98.462	91.348	91.297	2.033	2.325	2.021	2.014	2.012		175.675	166.531	0.1524
PIWSOD01	89.624	94.837	90.421	89.624	94.837	89.733	179.467	170.326	89.733	90.421	1.948	2.028	1.948	2.028	2.224		179.467	170.326	0.15235
POHYES	91.039	87.043	102.415	81.734	88.098	164.582	103.508	173.705	91.838	92.585	1.942	1.898	2.252	1.994	2.009		173.705	164.582	0.15205
IXAQUU	91.237	92.191	88.248	91.237	92.191	96.751	166.498	175.617	96.751	88.248	2.265	1.934	2.265	1.934	2.156		175.617	166.498	0.151983
LOJCEU01	101.975	98.945	103.703	91.979	163.358	81.812	154.299	95.223	93.098	86.762	2.377	1.87	1.748	2.48	2.455		163.358	154.299	0.150983
LUCYOY	95.192	94.779	88.922	90.288	166.825	86.547	175.883	98.046	92.965	89.294	2.404	1.937	1.846	2.411	2.416		175.883	166.825	0.150967
MUMTIZ	91.59	153.517	99.329	80.916	80.562	97.503	116.425	83.365	98.749	162.572	2.578	2.344	2.202	1.411	2.356		162.572	153.517	0.150917
LOJCEU	101.8	99.059	103.634	92.099	163.576	81.965	154.531	95.05	92.701	86.975	2.374	1.871	1.739	2.479	2.456		163.576	154.531	0.15075
XAVRIX	111.843	85.836	152.527	86.897	143.491	109.665	95.623	84.761	85.448	106.586	2.417	2.33	2.321	2.1	2.099		152.527	143.491	0.1506
WEMQAG02	89.269	91.935	177.285	95.27	89.904	168.297	88.958	83.081	90.217	101.796	1.968	1.911	1.944	2.291	1.966		177.285	168.297	0.1498
WEMQAG01	95.307	82.993	101.888	168.261	91.826	177.243	88.814	89.849	89.413	90.337	1.946	2.292	1.971	1.969	1.912		177.243	168.261	0.1497
OHIGES	102.852	98.815	105.784	149.318	99.363	158.296	98.026	104.868	74.625	76.358	2.621	2.132	2.326	2.309	2.626		158.296	149.318	0.149633
BAJZIW	109.159	82.468	85.94	91.66	173.665	94.622	164.695	102.45	84.659	87.566	1.977	2.141	2.018	1.998	2.012		173.665	164.695	0.1495
WEHYUF	103.023	88.005	89.109	91.444	176.78	89.202	167.866	90.716	91.49	88.208	2.463	1.538	1.998	2.323	2.34		176.78	167.866	0.148567
XAXPAN	90.764	178.146	89.409	95.375	89.073	89.409	169.25	89.073	90.764	95.375	2.034	1.938	2.034	2.211	1.938		178.146	169.25	0.148267
NOXYOO	88.463	88.169	158.941	98.974	89.037	167.836	88.463	102.015	90.492	103.098	2.46	2.363	2.379	2.374	1.778		167.836	158.941	0.14825
PEBMUE	92.126	97.781	95.03	178.762	89.06	169.876	91.367	85.694	89.846	89.609	2.02	2.411	1.901	1.924	1.988		178.762	169.876	0.1481
HAGRUE	91.31	85.493	164.085	95.728	109.277	155.206	91.19	99.672	85.66	95.502	2.378	2.407	2.379	2.156	2.37		164.085	155.206	0.147983
SARSEK	99.679	86.39	88.943	90.164	88.483	95.531	99.164	156.32	165.137	103.821	2.2	2.118	2.145	2.105	2.125		165.137	156.32	0.14695
POWCUZ	105.542	95.718	144.55	81.94	153.352	100.757	109.727	86.117	81.317	104.348	2.399	1.84	1.896	2.34	2.373		153.352	144.55	0.1467
FADZUF	91.125	95.354	88.695	91.125	95.354	90.961	178.078	169.291	90.961	88.695	1.944	2.03	1.944	2.03	2.199		178.078	169.291	0.14645
NIGPOK	86.204	92.612	97.374	164.134	97.15	172.853	87.984	98.192	85.176	89.996	2.373	1.79	2.061	2.125	2.415		172.853	164.134	0.145317
VIDBER	92.089	90.144	164.597	89.993	173.31	94.118	103.13	91.796	86.458	92.21	2.477	1.991	1.991	2.255	2.27		173.31	164.597	0.145217
SIRHUW	100.658	95.244	96.835	90.479	171.123	91.173	162.417	93.617	88.986	86.672	2.515	1.936	2.311	2.289	2.54		171.123	162.417	0.1451
MUNRIY	89.725	178.795	90.379	94.937	89.398	90.379	170.125	89.398	89.725	94.937	2.022	1.947	2.022	2.245	1.947		178.795	170.125	0.1445
CEPQET	165.035	90.779	89.793	93.048	173.698	88.921	105.163	88.465	93.205	90.195	2.453	1.813	2.043	2.425	2.417		173.698	165.035	0.144383
KEXKON	87.638	90.63	163.331	100.989	96.03	171.986	90.948	95.659	88.469	91.928	2.009	2.036	2.097	2.319	2.006		171.986	163.331	0.14425
EQAGUA	87.295	154.687	97.346	86.411	114.361	85.049	163.341	90.936	84.007	109.586	2.379	2.23	2.266	1.869	2.4		163.341	154.687	0.144233
BOKLIW	96.065	89.659	90.709	89.659	90.709	88.257	88.257	167.871	176.514	96.065	2.266	2.064	1.95	2.064	1.95		176.514	167.871	0.14405
POACCU10	92.681	92.545	176.631	89.744	168.053	95.392	84.294	89.117	89.222	96.348	2.28	1.953	1.96	2.023	2.018		176.631	168.053	0.142967
CILCIJ	89.33	173.038	89.73	97.767	93.481	89.73	164.466	93.481	89.33	97.767	2.635	2.365	2.635	2.055	2.365		173.038	164.466	0.142867
SEQWUH	97.56	91.198	100.009	162.661	89.842	171.233	89.836	97.258	88.242	89.448	2.398	1.925	2.398	2.385	2.432		171.233	162.661	0.142867
MUQQOE	96.395	98.209	90.66	173.932	88.669	165.389	90.207	95.396	90.089	89.502	2.372	2.358	2.15	2.138	2.372		173.932	165.389	0.142383
QOKDIE	97.031	175.909	96.396	167.376	84.653	87.018	92.944	96.227	82.765	85.362	1.547	2.143	2.33	2.321	1.558		175.909	167.376	0.142217
FOGNEV	103.57	97.746	94.526	94.058	86.388	91.305	83.835	97.358	167.562	159.064	2.154	2.088	2.165	2.14	2.185		167.562	159.064	0.141633
DONPIF	96.583	83.978	102.442	92.094	169.422	92.613	160.95	85.589	88.455	90.311	2.494	1.903	2.463	2.006	1.997		169.422	160.95	0.1412
MAHXEA	129.594	85.866	88.826	108.808	108.244	77.77	77.648	95.912	142.912	134.468	2.393	2.271	2.341	2.299	2.312		142.912	134.468	0.140733
ABAWAB	168.873	94.474	86.17	92.219	160.456	90.11	102.155	87.812	107.292	84.53	2.391	1.84	2.248	2.316	2.484		168.873	160.456	0.140283
KIZGUX	73.255	69.068	133.276	126.951	96.27	141.688	101.77	99.613	98.906	96.54	2.439	1.77	1.767	1.772	2.432		141.688	133.276	0.1402
EBUDAG	70.023	94.319	117.735	94.348	163.873	85.646	172.238	94.699	93.247	84.91	1.471	1.981	2.439	2.344	2.348		172.238	163.873	0.139417
KAHMIS	90.189	97.926	90.844	90.189	97.926	86.253	172.506	164.148	86.253	90.844	1.954	1.992	1.954	1.992	2.21		172.506	164.148	0.1393
PIKNII	110.399	84.192	88.375	92.127	169.511	89.189	161.187	87.544	94.081	87.645	2.439	1.416	1.968	2.328	2.33		169.511	161.187	0.138733
YECNEC	105.421	85.691	166.216	91.409	174.526	92.482	88.188	90.269	91.649	92.151	1.425	2.018	1.878	2.373	2.364		174.526	166.216	0.1385
VAGPEY	87.352	90.286	171.035	89.19	162.766	96.279	101.584	88.408	89.451	100.824	2.327	1.717	2.437	2.364	2.373		171.035	162.766	0.137817
MULSOB	175.427	92.182	91.052	167.171	95.066	92.312	89.186	89.841	97.687	88.919	1.966	1.988	2.104	2.008	2.136		175.427	167.171	0.1376
OBONID	95.13	87.856	91.963	87.856	91.963	91.013	91.013	169.739	177.974	95.13	2.281	2.01	1.967	2.01	1.967		177.974	169.739	0.13725
BEXPOL	89.528	89.26	166.91	98.325	96.783	158.686	88.215	94.724	88.174	104.524	2.303	1.989	1.985	2.581	2.272		166.91	158.686	0.137067
OBIYAZ	92.003	90.454	176.381	91.076	168.168	95.347	91.616	88.526	89.2	96.47	2.195	1.946	1.942	1.974	1.967		176.381	168.168	0.136883
AJOBAE	158.985	93.573	91.254	167.181	95.362	107.441	85.921	88.455	97.447	89.763	2.411	1.736	2.371	2.381	2.226		167.181	158.985	0.1366
CIGSAM	100.536	96.477	96.152	171.047	89.276	162.863	86.836	92.022	93.411	88.088	2.236	2.315	2.001	1.979	2.243		171.047	162.863	0.1364
WEHDEV	87.254	169.013	91.545	87.388	92.36	90.401	92.816	89.91	99.294	177.161	2.014	1.955	2.292	1.981	1.972		177.161	169.013	0.1358
KOYNUJ	89.686	90.512	90.007	91.634	87.751	95.631	94.286	178.217	170.072	90.885	2.342	1.979	2.014	2.002	1.976		178.217	170.072	0.13575
HAHKEH	88.078	87.569	91.068	90.555	89.923	105.7	86.818	175.472	167.344	96.234	2.284	1.954	1.985	1.937	1.972		175.472	167.344	0.135467
LEFGIM	99.146	165.722	91.728	173.798	90.853	95.131	83.56	89.052	89.905	90.242	2.24	1.972	1.977	1.927	1.996		173.798	165.722	0.1346
GIDVAT	103.084	88.257	84.74	176.677	89.383	168.624	87.874	92.483	92.352	90.985	2.011	2.282	1.952	1.964	2.024		176.677	168.624	0.134217
KIZHEI	67.594	67.442	126.742	126.084	95.463	134.767	105.717	107.171	104.597	93.017	2.427	1.685	1.794	1.793	2.425		134.767	126.742	0.13375
WEHZOA	121.225	81.416	84.795	95.182	161.988	88.993	153.964	84.445	94.59	88.843	2.456	1.542	1.985	2.353	2.346		161.988	153.964	0.133733
POACCU10	91.023	86.65	176.832	88.278	168.822	90.816	86.315	93.895	91.665	100.333	2.261	1.985	1.96	2.021	2.035		176.832	168.822	0.1335
YILYOH	111.94	84.382	83.929	84.355	84.405	107.076	105.997	138.918	146.922	109.136	1.687	2.379	2.397	2.378	2.412		146.922	138.918	0.1334
QABMUD01	86.98	91.939	168.619	95.667	76.342	160.705	86.254	92.774	97.455	84.464	2.482	2.009	2.026	1.89	2.515		168.619	160.705	0.1319
QENMUS	87.562	86.24	154.574	108.129	98.489	162.481	88.786	97.296	89.805	98.542	2.219	1.921	1.996	2.308	2.218		162.481	154.574	0.131783
XEKMUV	169.356	90.853	47.132	86.72	177.238	89.96	143.473	86.706	90.673	92.677	2.419	1.647	1.445	2.022	2.018		177.238	169.356	0.131367
ZAQVIZ	89.793	87.903	97.169	92.981	90.036	161.96	98.601	169.842	99.439	89.093	2.247	1.851	1.78	1.762	2.243		169.842	161.96	0.131367
ABAWAB	169.325	94.634	87.101	91.361	161.455	89.976	100.745	86.394	107.182	86.195	2.379	1.836	2.251	2.321	2.488		169.325	161.455	0.131167
MIZJEK	86.653	84.311	156.766	101.022	106.943	148.977	88.701	102.192	88.066	103.961	2.336	1.908	1.919	1.925	2.328		156.766	148.977	0.129817
WAJRII01	92.925	89.52	89.786	89.52	89.786	96.814	96.814	174.15	166.372	92.925	2.72	2.071	2.035	2.071	2.035		174.15	166.372	0.129633
EVOXOD	90.923	89.943	173.713	95.143	98.604	165.953	90.325	90.874	87.36	95.401	2.381	1.862	2.082	2.076	2.383		173.713	165.953	0.129333
XILHIK	103.365	108.655	102.103	82.496	146.752	89.727	154.508	103.623	83.192	90.457	2.348	1.829	2.21	1.805	2.331		154.508	146.752	0.129267
QUGYUM	92.912	161.341	89.819	169.096	86.91	105.714	95.149	92.555	87.444	95.357	2.316	1.922	2.384	2.389	2.436		169.096	161.341	0.12925
NOQNOW	85.081	92.191	105.975	103.311	86.544	158.091	100.667	150.374	100.979	85.244	2.358	1.862	1.803	2.346	2.308		158.091	150.374	0.128617
RELFUJ01	84.28	87.35	105.298	100.312	85.396	146.673	106.731	154.39	106.595	88.401	1.9	2.359	2.388	2.359	1.902		154.39	146.673	0.128617
WUFMOA	91.797	87.197	167.964	92.966	89.373	175.66	91.686	98.739	90.151	86.606	1.964	1.963	1.992	2.323	1.948		175.66	167.964	0.128267
NICZEE	94.464	89.149	169.753	89.374	162.065	78.868	93.891	91.777	86.651	118.881	1.954	2.328	2.337	2.438	2.008		169.753	162.065	0.128133
UTOTED	171.028	86.993	94.179	85.392	163.345	85.098	92.631	92.955	111.233	93.408	1.909	2.013	2.3	1.969	1.99		171.028	163.345	0.12805
SARSAG	108.226	84.763	85.752	91.089	92.087	97.977	97.745	155.869	163.548	95.906	2.239	2.11	2.114	2.133	2.119		163.548	155.869	0.127983
SINVOB	91.687	177.344	88.074	95.168	91.328	88.074	169.665	91.328	91.687	95.168	2.015	1.962	2.015	2.184	1.962		177.344	169.665	0.127983
SEJKEZ	114.395	81.757	88.999	91.443	163.991	89.579	156.316	82.36	90.27	95.163	2.456	1.471	1.967	2.069	2.301		163.991	156.316	0.127917
EVEKOF	96.398	97.704	91.501	173.399	91.833	165.732	94.743	95.096	87.055	84.756	2.665	2.019	2.376	2.39	2.657		173.399	165.732	0.127783
NEMZIP	94.447	178.589	88.257	170.927	90.362	86.235	96.832	90.845	90.436	92.239	2.408	2.013	1.953	1.941	2.029		178.589	170.927	0.1277
XEPPOX01	90.45	89.898	88.398	90.668	90.638	96.07	93.86	177.588	169.938	91.833	2.397	1.924	1.924	1.914	1.935		177.588	169.938	0.1275
RELFUJ	84.164	87.324	105.569	100.105	85.473	146.702	106.866	154.326	106.43	88.445	1.903	2.356	2.388	2.351	1.903		154.326	146.702	0.127067
PEMWEL	173.352	88.943	89.329	94.051	165.744	89.52	97.309	89.621	100.113	90.279	2.435	1.813	1.999	2.402	2.406		173.352	165.744	0.1268
DIFTAP	86.45	176.346	85.888	168.74	91.035	95.783	92.7	91.514	91.109	98.078	2.378	1.959	2.003	1.996	2.003		176.346	168.74	0.126767
LIKYAG	96.439	88.413	90.995	88.413	90.995	92.642	92.642	167.122	174.717	96.439	2.232	2.06	1.987	2.06	1.987		174.717	167.122	0.126583
FAYTOO	88.755	170.627	91.096	90.909	94.686	91.096	178.182	94.686	88.755	90.909	1.949	1.972	1.949	2.296	1.972		178.182	170.627	0.125917
GUYRUN	92.998	91.918	86.621	92.998	91.918	95.69	168.619	176.164	95.69	86.621	1.981	1.941	1.981	1.941	2.175		176.164	168.619	0.12575
ODIGAJ	154.651	76.656	88.687	96.536	162.131	90.542	114.808	91.798	96.778	94.632	2.701	1.647	2.25	2.313	2.324		162.131	154.651	0.124667
XUZMEK	89.379	97.558	163.759	88.978	92.993	95.65	88.304	90.91	98.667	171.238	2.323	2.005	2.032	2.014	2.577		171.238	163.759	0.12465
XOCXOD	90.943	90.663	88.956	90.943	90.663	94.381	171.237	178.674	94.381	88.956	1.97	1.95	1.97	1.95	2.253		178.674	171.237	0.12395
XAKGUN	93.917	94.52	88.933	178.447	92.382	171.025	88.892	89.591	88.214	90.73	2.039	2.243	1.955	1.957	2.037		178.447	171.025	0.1237
SAMREE	100.597	90.653	96.845	86.345	169.798	89.941	162.453	98.422	87.961	92.94	2.736	2.002	2.056	2.385	2.387		169.798	162.453	0.122417
ZEQNAM	83.144	95.06	93.82	170.879	88.931	178.203	90.913	95.233	89.162	91.272	1.943	2.361	1.946	1.962	1.938		178.203	170.879	0.122067
UGOSUE	89.184	89.426	174.265	92.181	97.189	166.943	88.613	93.31	91.526	95.852	1.966	2.052	2.038	2.299	1.956		174.265	166.943	0.122033
CUHDEP	86.833	94.998	168.817	91.051	92.965	105.498	88.256	90.428	95.994	161.498	2.539	2.463	2.452	1.784	2.02		168.817	161.498	0.121983
YOJTIA	83.396	100.128	90.417	168.939	93.505	176.257	83.98	84.932	97.194	85.517	2.399	2.048	2.077	2.16	2.398		176.257	168.939	0.121967
MURNET	85.726	177.394	87.791	170.116	90.765	92.597	100.99	91.19	90.576	88.731	2.379	2.052	2.05	2.02	2.059		177.394	170.116	0.1213
NIRWUI	99.71	156.75	77.249	73.486	88.72	102.159	164.025	86.251	79.556	122.244	2.481	2.33	1.515	1.509	2.326		164.025	156.75	0.12125
PIPRUD	173.87	89.685	91.822	96.683	166.606	88.564	94.212	92.305	96.491	88.068	2.422	1.829	1.987	2.393	2.395		173.87	166.606	0.121067
WUNZUA	90.679	88.335	172.664	93.624	95.451	165.428	90.712	93.266	88.508	99.12	1.928	2.038	2.049	2.232	1.968		172.664	165.428	0.1206
REKVEK	102.802	98.326	118.1	85.71	84.976	79.94	91.719	104.041	143.571	150.788	2.376	2.227	2.218	2.342	2.374		150.788	143.571	0.120283
ZZZALD01	82.983	107.041	90.936	177.09	90.046	169.881	90.498	86.157	90.708	89.251	1.942	2.247	1.969	1.959	1.962		177.09	169.881	0.12015
DODYAX	86.566	92.45	93.079	93.558	88.952	166.095	105.242	173.247	88.659	90.486	2.335	2.388	2.041	2.389	1.855		173.247	166.095	0.1192
ZIQXAY	91.917	89.742	171.04	83.943	163.926	95.831	96.325	91.164	92.9	100.176	2.493	1.824	2.068	2.392	2.409		171.04	163.926	0.118567
MUXVOQ	106.645	103.168	100.206	86.944	87.985	85.85	87.04	103.776	156.621	149.571	2.25	1.566	2.236	2.257	2.235		156.621	149.571	0.1175
REKDER	96.129	88.994	88.664	88.537	90.428	98.139	99.798	169.089	162.058	94.739	2.576	1.953	1.957	1.959	1.954		169.089	162.058	0.117183
NEMZOV	95.964	91.378	176.256	92.225	169.232	89.217	87.488	88.514	87.21	101.505	2.353	2.012	2.024	1.948	1.975		176.256	169.232	0.117067
MIKMUO	92.481	96.217	89.539	178.058	92.827	171.069	90.498	92.311	87.557	88.832	2.397	2.002	2.005	2.009	2.397		178.058	171.069	0.116483
XEPPOX	95.743	90.944	89.942	88.51	90.12	92.301	90.485	169.997	176.977	94.151	2.379	1.932	1.929	1.935	1.921		176.977	169.997	0.116333
DAQPUI	88.481	87.027	91.357	88.417	107.323	94.739	172.595	165.646	92.645	89.908	2.401	1.795	2.404	2.42	2.002		172.595	165.646	0.115817
XOFYEY	89.397	92.148	95.859	92.496	89.119	178.452	89.057	171.532	90.695	89.366	1.948	2.028	2.237	1.996	1.951		178.452	171.532	0.115333
AVEDUB	112.014	112.014	108.558	142.885	82.464	135.972	82.464	108.558	83.832	83.832	2.159	2.153	2.164	2.164	2.159		142.885	135.972	0.115217
XIHKEF01	98.729	91.107	92.637	176.837	91.497	169.932	88.38	90.471	89.028	90.573	1.938	2.235	2.034	2.031	1.96		176.837	169.932	0.115083
RIQPUE	99.872	100.698	102.984	152.327	86.945	159.178	90.459	104.689	88.06	84.765	2.509	1.784	1.822	2.376	2.489		159.178	152.327	0.114183
RUMYAZ	168.368	87.21	65.166	97.059	161.557	89.216	126.369	90.472	98.541	89.424	2.403	1.216	2.238	2.383	2.358		168.368	161.557	0.113517
IKEVEZ	91.646	89.797	91.46	95.7	89.756	165.934	89.691	172.712	104.262	87.045	1.966	2.006	2.29	1.974	1.96		172.712	165.934	0.112967
HEHJEL	90.716	90.046	176.72	92.121	92.777	169.949	90.967	90.46	87.807	97.239	1.979	1.951	1.955	2.234	1.979		176.72	169.949	0.11285
UZOSAF	99.457	81.645	164.832	93.782	158.09	104.876	95.506	87.266	92.164	95.521	2.266	2.031	2.229	2.225	2.244		164.832	158.09	0.112367
ERIPEB	86.244	156.658	97.121	98.306	78.329	97.121	163.387	78.329	86.244	98.306	2.118	2.237	2.118	2.199	2.237		163.387	156.658	0.11215
TAPCET	174.687	89.39	90.395	100.045	91.944	89.099	90.025	94.272	167.991	90.869	1.988	2.005	2.018	2.37	2.025		174.687	167.991	0.1116
SOCYAK	86.166	88.434	100.039	93.614	91.659	173.012	90.034	166.327	86.54	94.637	2.363	2.11	2.051	2.398	2.367		173.012	166.327	0.111417
MURZAA	90.707	177.565	89.487	94.559	88.782	89.487	170.883	88.782	90.707	94.559	2.029	1.953	2.029	2.236	1.953		177.565	170.883	0.111367
ILAZOK	100.929	90.544	90.846	91.042	174.792	89.274	168.157	93.708	91.902	86.97	2.421	2.056	1.844	2.368	2.372		174.792	168.157	0.110583
VEPBAT	93.907	88.217	89.416	89.943	89.96	98.719	96.919	170.919	164.306	95.162	2.194	2.04	1.996	2.049	1.973		170.919	164.306	0.110217
MURNET	92.402	89.249	91.279	89.77	90.355	85.914	104.343	176.293	169.694	83.893	2.408	2.033	2.044	2.016	2.026		176.293	169.694	0.109983
UREHUW	175.023	89.372	88.433	168.466	95.313	95.478	89.955	94.478	95.878	86.203	2.427	1.813	2.409	2.397	1.995		175.023	168.466	0.109283
GODZUU	104.928	90.924	94.78	170.473	88.349	163.931	89.949	94.745	91.353	87.74	2.406	2.019	2.358	2.362	1.798		170.473	163.931	0.109033
IMTCUP02	100.715	88.794	172.839	91.251	179.371	88.523	85.777	91.654	88.353	90.96	2.596	1.999	2.007	1.973	1.998		179.371	172.839	0.108867
PIWWEX	96.814	90.34	91.285	92.261	84.65	167.553	95.434	174.076	94.572	87.574	2.424	1.942	1.873	1.958	2.469		174.076	167.553	0.108717
REVSOB02	85.535	102.215	87.365	92.217	88.272	89.277	90.523	93.091	170.37	176.877	2.024	2.486	2.007	2.007	2.011		176.877	170.37	0.10845
TIKKUU	92.893	88.519	163.811	90.983	170.316	97.184	103.249	89.546	88.251	92.389	2.216	2.026	2.013	1.97	1.952		170.316	163.811	0.108417
OPARUT	166.18	84.728	98.467	96.873	90.264	89.266	88.993	77.432	172.658	90.189	1.98	2.079	2.192	2.123	1.989		172.658	166.18	0.107967
WAMBOB	117.468	93.475	79.015	85.687	169.875	88.111	163.476	95.828	92.184	91.132	2.427	1.956	2.008	2.342	2.341		169.875	163.476	0.10665
ANIMIU	81.59	92.909	38.486	165.734	95.887	172.11	87.425	155.092	84.76	91.421	2.034	1.68	1.528	2.327	2.046		172.11	165.734	0.106267
WEJYIV	89.812	93.155	175.968	90.875	93.459	96.944	88.841	89.764	90.78	169.596	1.949	2.024	2.015	1.946	2.308		175.968	169.596	0.1062
LEHCAC	87.447	91.365	176.618	85.791	92.262	170.248	90.782	97.293	89.894	97.49	2.369	1.832	2.08	2.45	2.387		176.618	170.248	0.106167
KEYKUU	93.687	93.258	96.506	166.638	92.312	172.97	90.373	96.518	89.916	85.824	2.363	2.056	1.628	2.521	2.399		172.97	166.638	0.105533
CUWQAO	86.675	91.7	88.65	91.664	88.477	90.643	98.699	176.985	170.656	90.313	3.265	2.034	2.033	2.033	2.022		176.985	170.656	0.105483
BAWLOC	95.491	98.558	87.717	87.961	89.748	91.342	89.57	96.944	173.54	167.213	2.054	2.282	2.057	2.035	1.977		173.54	167.213	0.10545
YIMWUM	102.969	92.92	92.308	88.229	170.677	93.459	164.375	96.072	88.957	86.928	2.541	2.013	1.898	2.357	2.372		170.677	164.375	0.105033
BOHGIP	101.681	110.379	102.569	154.221	87.29	147.931	89.006	103.208	83.481	86.142	2.351	1.857	2.297	2.293	2.388		154.221	147.931	0.104833
ZITREZ	92.596	87.429	90.97	88.885	89.609	102.072	94.846	169.346	163.059	98.031	2.193	2.032	2.041	2.018	2.021		169.346	163.059	0.104783
GOQFID	114.898	80.134	84.403	91.265	90.789	89.445	94.439	86.797	164.26	157.983	2.451	1.504	2.077	1.969	2.288		164.26	157.983	0.104617
YOPMIB	90.281	90.169	89.7	90.281	90.169	93.296	173.407	179.662	93.296	89.7	1.944	2.012	1.944	2.012	2.262		179.662	173.407	0.10425
LENKUM	83.819	172.545	85.948	85.828	95.46	97.089	166.297	91.987	94.24	85.445	1.995	2.213	2.017	2.009	1.997		172.545	166.297	0.104133
XOWXUD	168.442	86.754	93.162	76.061	174.637	83.451	84.333	92.506	109.277	97.812	2.349	2.071	1.589	1.8	2.017		174.637	168.442	0.10325
BUDHEO	91.005	89.916	176.374	89.123	99.089	90.098	86.933	92.442	93.069	170.187	1.993	1.992	1.991	2.025	2.314		176.374	170.187	0.103117
AGUZEI	80.238	79.08	144.805	114.4	97.806	150.906	90.262	100.789	94.962	106.012	2.456	2.287	2.048	2.034	2.474		150.906	144.805	0.101683
LEKFEO	104.64	103.295	101.309	158.077	84.688	151.979	89.264	100.401	87.406	88.194	1.932	1.743	1.962	2.009	2.022		158.077	151.979	0.101633
GUQYEX	88.591	91.738	100.155	94.813	86.776	171.118	94.665	165.027	94.014	90.614	2.274	1.993	2.26	1.972	2.28		171.118	165.027	0.101517
WIXMEX	85.534	85.069	83.75	100.599	94.874	169.558	87.055	175.646	87.407	94.841	2.327	2.132	2.496	2.231	2.337		175.646	169.558	0.101467
VUTBAO	94.579	97.429	116.569	161.586	88.758	167.667	90.241	81.736	86.907	90.198	1.974	2.213	1.975	2.044	2.005		167.667	161.586	0.10135
NADTUH	101.501	87.356	89.279	87.356	89.279	98.465	98.465	156.998	163.07	101.501	2.499	2.093	2.113	2.093	2.113		163.07	156.998	0.1012
DOLKOE	87.365	95.643	171.755	88.599	103.702	90.303	93.744	88.361	92.523	165.697	1.966	1.964	1.933	1.946	2.257		171.755	165.697	0.100967
GALLIO	101.017	94.572	97.009	88.212	90.954	87.325	89.973	96.607	168.409	162.373	2.016	2.542	1.999	2.013	2.032		168.409	162.373	0.1006
FANXAU	89.297	173.218	91.797	99.758	89.597	90.005	93.003	89.594	94.976	167.219	2.333	2	2.294	2.34	1.99		173.218	167.219	0.0999833
QUGYUM	93.605	90.616	160.453	85.82	166.445	96.364	105.93	92.765	86.609	96.519	2.317	1.939	2.421	2.382	2.385		166.445	160.453	0.0998667
EVEKUL	84.851	173.877	94.501	96.053	93.062	94.501	167.894	93.062	84.851	96.053	2.481	2.364	2.481	2.003	2.364		173.877	167.894	0.0997167
SADFIO	90.096	168.536	86.916	103.391	98.795	92.137	162.58	92.267	87.601	93.867	2.028	2.009	2.015	2.256	2.012		168.536	162.58	0.0992667
WIGJII	90.442	89.634	92.042	172.996	92.884	178.917	90.971	94.917	87.946	88.186	1.993	2.242	1.991	1.985	1.969		178.917	172.996	0.0986833
AGUZIM	78.975	80.858	100.956	113.596	90.249	151.331	97.862	145.437	105.84	94.901	2.449	2.255	2.029	2.047	2.437		151.331	145.437	0.0982333
KIPYIT	85.605	88.124	90.372	95.509	168.132	88.92	174.025	87.082	95.372	79.895	2.302	1.968	1.985	1.97	2.045		174.025	168.132	0.0982167
MULPAM	101.511	98.372	92.139	165.995	88.473	160.103	86.473	101.633	92.059	88.277	2.358	1.861	2.395	2.378	2.369		165.995	160.103	0.0982
TIKKOO	89.309	95.784	90.116	89.309	95.784	92.856	174.288	168.432	92.856	90.116	1.928	1.974	1.928	1.974	2.158		174.288	168.432	0.0976
RECWIG	87.09	98.647	71.18	93.05	101.146	110.604	149.635	155.456	93.857	99.28	2.224	1.955	1.948	2.207	2.251		155.456	149.635	0.0970167
ZOXLOP	94.177	83.641	94.173	94.484	165.824	86.335	171.623	84.381	93.923	87.004	2.49	1.546	1.987	2.374	2.37		171.623	165.824	0.09665
WEHZEQ	87.982	157.391	81.882	84.833	97.047	87.982	123.562	97.047	81.882	151.605	2.473	2.355	1.579	2.001	2.355		157.391	151.605	0.0964333
JOHNOJ	92.826	90.883	165.928	82.835	97.906	160.227	88.617	83.169	92.474	101.817	2.342	1.866	1.864	1.803	2.386		165.928	160.227	0.0950167
KAZLUT	90.606	100.301	166.973	84.447	93.889	92.637	91.959	91.507	92.339	172.67	2.504	2.193	1.783	2.504	2.413		172.67	166.973	0.09495
YOPMIB01	90.239	90.375	89.719	90.239	90.375	93.213	173.574	179.249	93.213	89.719	1.945	2.008	1.945	2.008	2.247		179.249	173.574	0.0945833
REZFUY	88.374	172.133	91.475	91.099	93.934	91.475	177.802	93.934	88.374	91.099	1.985	2.002	1.985	2.241	2.002		177.802	172.133	0.0944833
ATOCIV01	91.388	93.808	176.134	91.873	102.583	86.615	85.843	90.424	88.726	170.487	2.015	2.01	2.01	1.966	2.324		176.134	170.487	0.0941167
SARSAG	93.632	88.075	90.299	87.728	89.63	101.103	97.655	166.879	161.236	99.486	2.229	2.112	2.135	2.124	2.128		166.879	161.236	0.09405
PEMMIF	173.695	88.752	91.483	95.776	168.056	88.621	94.489	93.394	95.912	88.025	2.428	1.837	1.98	2.407	2.403		173.695	168.056	0.0939833
HUCWAF	91.24	87.408	93.218	94.665	91.726	166.479	95.972	172.115	97.536	87.771	2.382	2.122	1.853	2.124	2.358		172.115	166.479	0.0939333
TUTTAE	96.237	93.314	93.081	175.976	90.342	170.368	88.982	90.939	89.267	90.741	1.966	2.296	2.006	2.015	1.972		175.976	170.368	0.0934667
LULDOM01	101.095	157.373	89.451	162.963	89.389	101.531	98.022	86.974	87.525	99.012	1.979	2.042	2.029	2.025	2.021		162.963	157.373	0.0931667
QATBOF	88.283	93.546	173.396	90.992	94.287	97.755	90.273	89.077	93.033	167.807	2.395	2.514	1.734	2.406	2.002		173.396	167.807	0.09315
FAXPAY	89.34	94.613	90.953	89.34	94.613	88.179	176.358	170.775	88.179	90.953	1.951	2.023	1.951	2.023	2.222		176.358	170.775	0.09305
WETFUW	89.855	88.555	174.91	90.333	169.337	97.547	94.32	92.353	88.011	93.081	2.054	2.313	2.312	2.124	2.106		174.91	169.337	0.0928833
WUGKOA	100.272	95.874	92.851	94.079	91.219	86.077	88.162	83.118	170.28	175.853	2.248	1.451	2.077	1.791	2.12		175.853	170.28	0.0928833
BOMMEV	95.94	98.092	94.687	171.504	88.191	165.938	90.745	93.653	89.03	90.004	2.371	1.705	2.374	2.419	2.361		171.504	165.938	0.0927667
VAYBUS	161.247	83.378	103.49	91.454	99.562	86.064	84.139	93.022	166.757	104.01	2.379	2.311	2.319	1.952	2.37		166.757	161.247	0.0918333
CEPQET	167.143	92.265	89.889	92.718	172.645	87.708	102.933	86.93	94.592	91.453	2.442	1.824	2.039	2.43	2.41		172.645	167.143	0.0917
UKACAL	153.949	88.72	86.502	99.959	98.837	85.086	90.486	79.769	159.446	126.178	2.44	1.598	2.309	2.185	2.359		159.446	153.949	0.0916167
HAHKEH	172.225	94.257	87.987	166.734	99.62	92.154	87.258	87.995	93.283	95.272	1.92	1.955	1.977	1.961	2.218		172.225	166.734	0.0915167
SINFIG	101.167	93.926	89.571	93.337	174.258	88.538	168.782	91.764	87.485	89.602	2.429	1.992	1.808	2.412	2.41		174.258	168.782	0.0912667
QATWIT	88.707	157.629	82.312	94.899	100.764	94.265	163.077	100.432	88.83	100.837	2.709	2.308	2.754	2.664	2.692		163.077	157.629	0.0908
IBEFUT	85.05	91.695	164.274	96.295	99.494	158.832	87.331	98.707	90.458	101.674	2.37	2.379	2.363	2.13	2.387		164.274	158.832	0.0907
PAQFAQ	89.402	166.611	91.524	93.975	83.306	91.524	172.049	83.306	89.402	93.975	2.637	2.36	2.637	2.278	2.36		172.049	166.611	0.0906333
LOJBOD	157.442	92.781	103.501	97.427	162.866	86.198	98.936	90.011	98.344	84.778	2.353	1.758	1.848	2.457	2.473		162.866	157.442	0.0904
AFAFAQ	95.877	84.018	93.755	93.976	164.646	89.996	170.052	82.117	93.481	84.904	2.819	1.598	1.997	2.322	2.33		170.052	164.646	0.0901
EFIVEW	96.637	89.42	168.647	88.35	163.252	96.188	94.707	90.004	88.931	100.503	2.668	2.017	2.017	2.269	2.323		168.647	163.252	0.0899167
ATALEM	95.214	90.645	93.11	168.735	89.397	174.124	89.518	98.154	90.612	89.33	2.396	1.973	2.401	2.402	1.868		174.124	168.735	0.0898167
HIYGON	87.076	92.562	165.158	98.563	85.758	170.544	84.765	95.401	93.459	103.687	2.423	2.357	2.394	2.299	1.793		170.544	165.158	0.0897667
SERSUD	86.032	94.466	167.622	97.53	91.433	172.99	92.786	94.848	85.227	95.494	2.407	2.082	2.092	2.014	2.399		172.99	167.622	0.0894667
OYUCAO	96.894	87.855	91.055	89.611	89.955	92.876	94.205	167.552	172.915	95.453	2.799	2.021	2.007	1.986	2.012		172.915	167.552	0.0893833
CIFJUY	103.649	102.82	97.16	90.969	153.83	84.49	159.191	102.82	90.969	84.49	1.921	2.401	2.34	2.335	2.335		159.191	153.83	0.08935
POXFEP	156.266	83.544	89.128	103.519	94.76	95.726	84.264	107.315	161.62	96.397	2.317	2.323	2.229	2.301	2.227		161.62	156.266	0.0892333
JOHNID01	92.859	90.674	89.854	90.111	89.303	88.452	92.088	173.878	179.225	93.26	1.843	1.885	1.908	1.885	1.89		179.225	173.878	0.0891167
ADOJAH	92.79	92.358	90.493	86.51	170.448	92.796	175.778	90.684	84.413	96.099	2.037	1.8	1.785	1.926	1.947		175.778	170.448	0.0888333
DUYHUC	88.616	97.022	90.318	88.616	97.022	94.363	171.274	165.955	94.363	90.318	1.958	1.961	1.958	1.961	2.141		171.274	165.955	0.08865
KIHTUS	84.305	159.342	85.243	100.659	106.423	90.585	154.055	94.235	90.891	103.741	2.185	1.931	2.205	2.228	2.201		159.342	154.055	0.0881167
WUGKIU	88.148	88.154	94.696	177.806	92.075	172.524	86.494	87.396	87.337	94.245	2.354	1.452	2.201	1.794	2.11		177.806	172.524	0.0880333
SUCBUN	85.717	94.335	93.606	93.957	97.327	94.687	170.812	165.548	94.501	84.853	2.352	2.328	2.415	2.327	2.274		170.812	165.548	0.0877333
NAMPCU	89.799	168.456	88.216	101.632	91.197	92.679	163.22	77.373	92.58	94.176	1.965	1.996	1.947	2.338	2.007		168.456	163.22	0.0872667
SARSEK	100.818	101.987	101.369	88.822	89.657	86.691	87.519	97.355	156.597	161.827	2.118	2.195	2.131	2.136	2.126		161.827	156.597	0.0871667
GUYRUN02	92.67	174.886	86.868	95.17	92.557	86.868	169.66	92.557	92.67	95.17	1.978	1.935	1.978	2.141	1.935		174.886	169.66	0.0871
GUYRUN01	86.956	174.607	92.545	95.303	92.696	92.545	169.395	92.696	86.956	95.303	1.976	1.926	1.976	2.164	1.926		174.607	169.395	0.0868667
WABKOZ01	85.002	168.741	94.402	93.026	95.629	94.402	173.947	95.629	85.002	93.026	2.363	2.346	2.363	2.014	2.346		173.947	168.741	0.0867667
HABPEG01	91.832	87.738	91.815	174.207	91.603	179.41	86.015	90.946	93.593	88.807	1.962	2.236	1.953	1.958	1.951		179.41	174.207	0.0867167
IBEPIQ	98.864	82.432	93.075	91.475	173.171	89.099	168.002	91.192	91.307	89.476	2.388	1.288	2.003	2.353	2.348		173.171	168.002	0.08615
NIJSEE	88.912	94.163	90.856	88.912	94.163	91.596	176.807	171.674	91.596	90.856	1.92	2.042	1.92	2.042	2.251		176.807	171.674	0.08555
WABKOZ02	84.661	173.938	94.746	95.595	93.031	94.746	168.81	93.031	84.661	95.595	2.358	2.371	2.358	2.014	2.371		173.938	168.81	0.0854667
WABKOZ	95.528	95.671	93.233	173.899	84.736	168.8	84.583	92.868	94.722	94.764	2.36	2.016	2.37	2.368	2.359		173.899	168.8	0.0849833
XUWZEU01	107.081	105.737	104.62	152.26	90.088	147.169	89.175	103.11	81.738	83.446	1.902	1.806	1.99	1.94	1.915		152.26	147.169	0.08485
XEPPOX01	92.675	90.151	90.628	90.334	88.263	93.286	95.837	175.881	170.797	91.212	2.379	1.924	1.937	1.933	1.939		175.881	170.797	0.0847333
WEHZIU	93.052	86.21	93.76	91.04	168.056	85.687	173.137	83.446	95.592	88.909	2.486	1.518	2.007	2.305	2.345		173.137	168.056	0.0846833
AGUDIR	164.756	91.05	96.97	94.642	159.74	87.015	98.117	88.488	105.513	88.137	2.456	2.032	1.83	2.334	2.33		164.756	159.74	0.0836
JIKXUW	88.998	89.443	174.846	86.966	93.515	169.835	88.134	97.622	92.63	96.648	2.35	2.06	1.943	1.981	2.355		174.846	169.835	0.0835167
YIJVAP	87.327	177.762	87.392	107.265	68.433	91.462	172.795	109.366	93.651	69.998	2.308	2.1	2.093	2.287	2.102		177.762	172.795	0.0827833
AGABUH	89.664	92.555	90.343	89.664	92.555	89.928	179.856	174.89	89.928	90.343	1.934	2.029	1.934	2.029	2.238		179.856	174.89	0.0827667
WURQEG	101.425	88.605	94.097	89.233	91.379	90.318	88.729	86.125	177.264	172.302	1.995	2.469	1.998	1.994	2.005		177.264	172.302	0.0827
ZALQIP	86.253	87.961	90.426	88.825	92.884	96.43	89.384	178.774	173.849	92.768	2.551	1.905	1.903	1.91	1.891		178.774	173.849	0.0820833
LUCYEO01	94.645	97.676	89.49	92.54	170.309	88.932	175.229	91.997	88.157	89.697	2.434	2.005	1.819	2.405	2.406		175.229	170.309	0.082
ZZZALD01	92.24	89.158	100.84	88.565	91.008	90.59	89.023	92.607	170.002	174.917	1.948	2.245	1.949	1.947	1.935		174.917	170.002	0.0819167
ESEHUG	83.679	103.484	96.514	89.028	172.917	85.823	177.819	83.344	92.022	93.151	2.329	1.6	2.104	1.822	2.042		177.819	172.917	0.0817
ZIMFEG	110.057	109.125	110.743	135.844	79.602	140.726	80.937	113.38	87.841	82.7	2.082	1.687	2.084	2.036	2.08		140.726	135.844	0.0813667
TIYWUV	86.468	90.911	159.035	99.413	100.113	163.915	89.559	101.47	87.234	95.961	2.408	2.416	2.427	1.882	2.389		163.915	159.035	0.0813333
[truncated: 400 more rows]
